# Supplementary material for: Differential alternative splicing genes and isoform co-expression networks of Brassica napus under multiple abiotic stresses
Source: Front Plant Sci. 2022 Oct 13;13:1009998. doi: 10.3389/fpls.2022.1009998 (PMC9608124; doi:10.3389/fpls.2022.1009998)
Supplement: Supplementary file 7 [file Table_1.xlsx]

## Sheet: Sheet1
Table S1 Statistical summary of RNA-seq material and identified alternative splicing (AS) events
Sample	DataID	Type	Transcript number	A3SS	A5SS	ES	IR
control	CRR058110,CRR058111,CRR058112	PE	115196	1128	1132	268	2170
1 h_dehydration	CRR058114,CRR058115	PE	113207	977	988	248	1865
8 h_dehydration	CRR058116,CRR058117,CRR058118	PE	119257	1707	1557	447	3212
4 h_cold	CRR058131,CRR058132,CRR058133	PE	116645	1246	1207	323	2657
24 h_cold	CRR058134,CRR058135,CRR058136	PE	117740	1434	1377	381	2646
4 h_ABA	CRR058125,CRR058126,CRR058127	PE	115418	1169	1123	295	2141
24 h_ABA	CRR058128,CRR058129,CRR058130	PE	118121	1479	1426	378	2700
4 h_NaCl	CRR058119,CRR058120,CRR058121	PE	117188	1399	1315	361	2512
24 h_NaCl	CRR058122,CRR058123,CRR058124	PE	118982	1606	1489	394	3117
