# Supplementary material for: Differential alternative splicing genes and isoform co-expression networks of Brassica napus under multiple abiotic stresses
Source: Front Plant Sci. 2022 Oct 13;13:1009998. doi: 10.3389/fpls.2022.1009998 (PMC9608124; doi:10.3389/fpls.2022.1009998)
Supplement: Supplementary file 8 [file Table_2.xlsx]

## Sheet: Sheet1
Table S2 TPM values of 129760 isoforms in 26 samples
Transcript ID	control1	control2	control3	1h_de2	1h_de3	8h_de1	8h_de2	8h_de3	4h_cold1	4h_cold2	4h_cold3	24h_cold1	24h_cold2	24h_cold3	4h_ABA1	4h_ABA2	4h_ABA3	24h_ABA1	24h_ABA2	24h_ABA3	4h_NaCl1	4h_NaCl2	4h_NaCl3	24h_NaCl1	24h_NaCl2	24h_NaCl3
BnaA01g00010D	0.208161	0.0627	0.062634	0.063706	0.19031	0.369322	0.214615	0.0697	0.140686	0.063206	0.134922	0.063133	0.06676	0.068684	0.117799	0.137515	0.131678	0.207566	0.065903	0.13844	0.061096	0.066995	0.065889	0.288457	0.382695	0.155747
BnaA01g00020D	1.28006	1.77681	1.3537	1.20376	1.44534	0.660339	0.646887	0.481109	0.651124	0.879754	1.02626	0.661892	0.365877	1.03627	1.59521	1.28717	1.73459	0.847048	0.855835	0.928841	1.82313	0.592674	0.761982	1.39868	0.733941	1.27713
BnaA01g00030D	0	0.03642	0.005528	0	0.029114	0.103578	0.85048	0.575491	0.046527	0	0.020303	0.018442	0.101629	0.022959	0.060012	0	0	0.028869	0	0.6491	0	0.035776	0.048822	0	0.068205	0
BnaA01g00040D	0	0	0	0	0	0	0	0	0	0	0	0	0	0	0	0	0	0	0	0	0	0	0	0	0	0
BnaA01g00050D	46.0412	56.422	33.7312	19.1161	20.167	67.85	37.4352	47.8405	28.5938	59.7621	23.4015	29.1252	46.7745	36.7609	24.692	25.728	27.7212	47.492	53.6715	44.1343	42.2357	67.5231	52.5981	56.8002	47.788	44.5883
BnaA01g00060D	0.675125	0.712642	0.296213	2.13948	2.08226	3.34331	2.91151	2.91795	1.48283	1.2044	2.52318	0.660079	0.837778	0.933822	1.08061	1.75919	1.65278	0.800726	1.7165	1.03154	4.2474	3.09302	6.86187	0.784431	0.774908	1.22273
BnaA01g00070D	0	0	0	0	0	0	0	0	0.04741	0	0	0	0	0	0.05215	0.139341	0.171195	0	0	0	0	0	0	0	0	0
BnaA01g00080D	1.15134	1.07131	1.2714	15.6627	16.5999	25.0581	22.1014	15.453	1.68058	2.9129	1.24768	1.43269	1.08795	2.23919	3.10156	1.24542	2.80337	13.2075	9.26598	14.6433	8.74987	10.2935	12.2389	6.19913	8.60557	9.33779
BnaA01g00090D	0.026898	0	0	0.161214	0.028251	0.303381	0.469185	0.117736	0.027423	0.027682	0.02149	0.231596	0.057355	0.026906	0	0.052115	0	0	0.159068	0.018092	0.067579	0	0	0.037958	0.08232	0.042669
BnaA01g00100D	4.65464	4.56329	4.23063	3.47526	3.73778	7.81542	8.13896	8.754	3.83089	5.67844	4.25379	5.18546	5.61502	5.73522	5.22266	4.72471	3.76105	5.20078	6.96346	5.95643	4.88717	5.48299	4.76367	7.32638	6.03688	6.4538
BnaA01g00110D	0	0	0	0	0	0	0	0	0	0	0	0	0	0	0	0	0	0	0	0	0	0	0	0	0	0
BnaA01g00120D	2.78617	1.94604	2.00285	1.30781	2.12153	2.85446	1.23038	2.29278	1.91786	1.42169	0.909665	0.306932	0.205468	0.518421	1.46971	1.61377	2.16195	2.59098	2.32082	2.40658	1.33133	1.65437	0.600564	2.18694	2.35271	3.11648
BnaA01g00130D	1.66142	1.43386	0.731338	0.448106	0.598603	0.109231	0.040691	0	0.8389	0.814229	0.289183	0.381059	0.453057	0.16443	0.525104	1.18718	1.01046	1.81195	1.19879	1.26021	0.254611	0.642495	0.416408	0.239184	0.380623	1.13684
BnaA01g00140D	9.00952	9.00837	10.4045	2.8962	3.62802	0.194684	0.193651	0.172079	10.3881	15.051	4.68002	0.096148	0.244096	0.049988	2.32466	1.88916	3.19255	4.11772	4.3907	4.02237	1.9543	1.56517	0.607778	7.81282	4.30711	5.62332
BnaA01g00150D	0.390581	0.119217	0.422331	1.3069	0.811575	0.521351	0.904177	0.524421	0.105461	0.274515	0	0.983182	0.903977	0.806037	0.862326	0.748004	1.21415	1.71758	1.43754	0.99021	0.648278	0.933115	1.12627	1.04588	1.16644	1.50928
BnaA01g00160D	0.501741	0.685074	0.394492	0	0.100668	0.154418	0.111541	0	0.219966	0.51036	0.204819	0.21457	0.607906	0	0.300804	0.124033	0.132695	0.61629	0.161051	0.558253	0.119723	0.24749	0.061212	0.613907	0.148647	0.16933
BnaA01g00170D	691.301	623.074	755.425	689.391	663.568	100.651	247.382	226.831	437.921	466.76	469.219	294.323	270.345	302.747	677.464	543.558	605.208	326.827	306.652	248.379	656.708	527.945	620.056	463.896	395.918	440.715
BnaA01g00180D	0	0	0	0	0	0	0	0	0	0	0	0	0	0	0	0	0	0	0	0	0	0	0	0	0	0
BnaA01g00190D	2.62649	0.906795	5.24804	0.358468	1.61287	0.909572	0.44661	0.594525	3.85002	1.8375	1.33757	32.5523	38.3014	25.6718	0.595392	0.848318	0.408784	0.747545	0.955127	0.751555	0.992119	0.247326	0.500314	0.907485	0.687427	0.56363
BnaA01g00200D	8.31714	7.61749	7.16923	12.2635	11.7761	19.5821	18.0115	20.2845	6.03485	6.66469	8.40714	10.2068	8.72795	14.6995	10.8231	7.70059	9.67894	13.8141	12.5746	12.52	14.9186	14.0429	20.2322	10.7677	7.97733	9.31058
BnaA01g00210D	12.0796	9.96405	14.7054	21.7316	19.3923	33.7045	46.2529	35.9834	10.9239	8.60154	8.55438	14.1817	13.0782	16.3602	55.7884	65.4144	29.8952	6.13513	8.92273	8.04092	49.5694	53.6841	66.1164	22.1184	22.485	23.2104
BnaA01g00220D	0	0	0	0	0	0	0	0	0	0	0	0	0	0	0	0	0	0	0	0	0	0	0	0	0	0
BnaA01g00230D	0	0	0	0	0	0	0	0	0	0	0	0	0	0	0	0	0	0	0	0	0.113797	0	0	0	0	0
BnaA01g00240D	0	0	0	0	0	0	0	0	0	0	0	0	0	0	0	0	0	0	0	0	0	0	0	0	0	0
BnaA01g00250D	0	0	0	0	0	0	0	0	0	0	0	0	0	0	0	0	0	0	0	0	0	0	0	0	0	0
BnaA01g00260D	2.01023	4.03182	1.5912	2.73055	3.77703	4.6185	5.46538	4.01659	5.61261	8.4868	5.54476	8.30164	7.17189	7.69002	3.40362	4.91115	2.72834	5.76763	4.43635	5.38184	3.75995	5.36169	6.09036	2.15198	2.30813	2.50076
BnaA01g00270D	0.563584	0	0	0.4401	0.288467	0.114358	0.102743	0	0.069536	0	0	0	0.039095	0.07804	0	0	0	0	0	0	0	0	0.074145	0	0	0
BnaA01g00280D	40.1092	38.1926	37.5944	29.4974	26.8107	20.3649	30.9628	18.569	83.7961	104.091	66.3792	18.8356	20.8952	25.1287	31.0177	21.7277	28.1156	45.867	40.1701	42.7351	35.4776	39.4489	27.3881	45.9165	50.9402	47.3898
BnaA01g00290D	0.374376	0.271855	0.701342	0.028494	0.029653	0	0	0.130011	0.176731	0.072252	0.162049	0.051794	0.056599	0.120773	0.528732	0.303156	0.612453	0.162163	0.534919	0.347349	0.057188	0.088066	0.073201	0.692004	0.587199	0.616593
BnaA01g00300D	0.189052	0.080964	0.303578	0	0	0.167991	0.040978	0.282151	0.252674	0.191938	0.42095	0.12795	0.044285	0	0	0.04296	0.250615	0	0	0.065368	0.036267	0	0.043079	1.07052	0.369648	0.521761
BnaA01g00310D	0.60445	0.900681	0.891359	2.00812	3.42169	5.90279	4.01152	4.00996	0.465482	1.29596	0.597873	2.79514	3.12031	2.41217	1.018	0.965518	1.07912	0.974552	1.96743	1.35969	2.43243	1.19474	2.12847	0.983409	1.18932	1.62365
BnaA01g00320D	1.60895	0.652283	2.24282	1.21695	0.997475	1.89155	0.904182	1.52949	6.75858	5.42029	7.11952	6.02724	1.34955	1.33556	2.66189	1.78635	2.23618	0.459207	0.615077	0.772664	1.08715	1.32914	2.71179	2.30575	3.5804	2.02517
BnaA01g00330D	0.064862	0.604477	0.398815	0.597261	1.1791	2.5882	1.26694	0.772074	0.407261	0.367797	0.356993	0.24426	0.278598	0.403832	0.624518	0.60638	0.547481	0	0	0	0.974998	0.115557	0.325665	0	0.085612	0.066571
BnaA01g00340D	2.65166	3.06434	1.82531	1.35509	1.36504	0.692469	1.12835	1.02664	4.00302	4.91756	3.8248	3.13432	3.75406	3.80979	1.25554	1.67706	0.870008	1.30076	1.77422	1.52689	1.3907	1.68455	1.02162	1.41691	1.68905	1.72269
BnaA01g00350D	0.064862	0.732727	0.398815	0.597261	1.26213	3.31067	1.54565	0.999993	0.508377	0.367797	0.447677	0.261922	0.278598	0.403832	0.624884	0.853929	0.547481	0	0	0	1.3271	0.115557	0.325665	0	0.085612	0.066571
BnaA01g00360D	0.089096	0.192377	0.043508	0.652471	0.681335	1.17703	2.18541	0.369883	0.132617	0.213135	0.243132	0.30319	0.122968	0.087958	0.27908	0.104488	0.045185	0.619589	0.558496	0.045491	1.31478	2.2705	3.42483	0	0.421838	0.106916
BnaA01g00370D	0	0	0	0	0	0	0	0	0	0	0.095641	0	0	0	0	0	0	0	0	0	0.130795	0.212562	0.110675	0	0	0
BnaA01g00380D	8.04301	10.8323	8.79147	11.0822	7.75707	2.1124	5.03963	6.25205	12.2989	8.92813	11.2956	2.03877	1.34665	1.88731	10.9944	4.22236	9.4459	15.0275	10.5626	14.1398	8.58486	10.62	8.656	13.1618	18.8888	15.6794
BnaA01g00390D	6.98672	6.38021	8.99912	25.7387	19.7938	31.1924	39.5801	44.1139	12.0807	6.5796	8.54278	4.03992	2.60129	3.64522	39.1994	30.1456	31.2419	18.2467	14.6618	17.9755	33.6824	39.5402	38.1203	19.1861	29.6714	28.4788
BnaA01g00400D	2.21083	1.88769	2.82551	5.28954	4.80004	2.90446	7.01469	2.5115	5.71247	2.86693	4.55427	7.18458	8.24274	9.46569	10.2017	11.2614	5.40285	2.85519	1.47199	2.27227	10.0032	12.894	10.4768	1.76513	5.78131	2.60358
BnaA01g00410D	4.38773	2.49816	5.42981	5.69944	6.47618	2.16885	4.13812	1.84264	3.44626	2.58164	7.46149	8.33863	5.63118	10.6576	22.4089	22.4612	12.3354	8.15138	4.38012	5.35813	19.9796	23.8093	35.1678	0.900548	1.74832	2.05721
BnaA01g00420D	0.326472	16.019	18.4705	0.001134	5.09656	0.002129	0.000473	0.001166	0	0	0	2.12146	0	0	0	0.000684	2.38561	0	0	0.000223	0	0	6.69894	0	0	0.000937
BnaA01g00430D	0.236556	0.232946	0	0.272021	0.042874	0.56993	0.443642	0.181739	0	0.057768	0.194827	0.129188	0	0.355379	0.089771	0.260109	0.164038	0.053862	0	0.088001	0.149915	0.065556	0	0	0.043314	0.14936
BnaA01g00440D	2.20651	1.91457	1.56888	2.3786	2.38905	2.6603	4.52743	3.04431	2.31156	2.44715	2.77211	1.42581	1.85394	1.53613	1.32174	1.04082	1.60654	1.82964	1.93486	1.45867	2.32957	2.77652	2.70297	3.47759	2.76144	3.24483
BnaA01g00450D	2.24474	2.83675	2.7257	0.879392	1.07805	0.273673	0.629885	0.362628	1.36294	2.11342	1.81147	1.39111	0.73876	1.43354	1.7272	2.03224	3.85713	0.43101	3.28105	1.37443	0.640747	0.508682	0.775959	3.4781	2.38584	2.67169
BnaA01g00460D	1.82196	2.16009	1.92004	2.40901	2.83588	2.6185	1.84067	2.78763	1.1444	0.856817	1.77965	2.19995	1.99916	2.0322	2.52062	1.89604	2.53196	1.96291	3.06972	3.33665	3.64431	2.94019	2.43017	2.7085	2.32008	2.1815
BnaA01g00470D	0	0	0	0	0	0	0	0	0	0	0	0	0	0	0	0	0	0	0	0	0	0	0	0	0	0
BnaA01g00480D	0	0	0	0.035724	0	0	0.16432	0	0.304323	0.277719	0	1.48377	1.12515	0.54486	0.114821	0.134924	0	0.082074	0.148514	0.631318	0.402316	0.140128	0.405894	0.010934	0	0.028072
BnaA01g00490D	0	0	0	0	0	0	0	0	0	0	0	0	0	0	0	0	0	0	0	0	0	0	0	0	0	0
BnaA01g00500D	0.875426	1.47374	1.15547	1.05786	1.1025	3.64862	2.1056	2.07026	1.39828	1.03344	0.96176	2.59345	1.9194	2.94147	0.944974	1.01149	1.12841	1.53212	2.03129	1.09149	1.86368	1.17305	1.78131	2.02779	1.55356	1.86011
BnaA01g00510D	0	0	0	0	0	0	0	0	0	0	0	0	0	0	0	0	0	0	0	0	0	0	0	0	0	0
BnaA01g00520D	0.038656	0	0	0	0	1.53303	5.49707	0.068341	0	0	0.07229	0.141021	0.213768	0.208127	0	0	0	0.096353	0.038083	0.351824	0	0	0.01951	0	0	0
BnaA01g00530D	0	0	0	0	0	0	0	0	0	0	0	0	0	0	0	0	0	0	0	0	0	0	0	0	0	0
BnaA01g00540D	0	0	0	0	0	0	0	0	0	0	0	0	0	0	0	0	0	0	0	0	0	0	0	0	0	0
BnaA01g00550D	0	0	0	0	0	0	0	0	0	0	0	0	0	0	0	0	0	0	0	0	0	0	0	0	0	0
BnaA01g00560D	0	0	0	0	0	0	0	0	0	0	0	0	0	0	0	0	0	0	0	0	0	0	0	0	0	0
BnaA01g00570D	0	0	0	0	0	0	0	0	0	0	0	0	0	0	0	0	0	0	0	0	0	0	0	0	0	0
BnaA01g00580D	0.062795	0	0	1.14854	1.9271	1.562	6.57022	0.474255	0.093625	0.183979	0.231813	4.94008	2.70674	2.66022	0	0.232813	0	0	0.031165	0.063589	0.125053	0.127596	0.317048	0.031448	0	0
BnaA01g00590D	23.4548	23.984	25.2954	69.2805	57.7821	31.1715	38.3975	19.9711	17.7744	34.3141	19.892	5.00494	6.18829	10.697	26.4615	14.5549	28.2926	43.7719	40.5912	49.0963	43.0265	43.7528	32.839	54.7028	64.6656	62.4087
BnaA01g00600D	7.58687	8.64614	10.7192	7.28971	8.516	10.8196	19.8609	11.6331	5.23984	5.8619	7.38401	3.64864	1.55131	4.89142	18.6473	14.0255	13.7905	7.13636	8.52963	7.67088	53.9412	71.4029	85.9537	5.4985	10.7615	11.5533
BnaA01g00610D	19.5785	15.4881	25.539	24.2949	20.6053	80.601	81.0683	92.5573	18.6379	19.2244	20.4653	3.38522	3.35089	3.64635	44.7858	37.69	31.7879	9.04254	15.525	9.96363	59.1752	75.0551	67.6511	28.2241	41.1543	34.6328
BnaA01g00620D	0.061627	0	0	0.085901	0	0.062355	0.063182	0.060806	0	0	0	0	0	0	0.139348	0	0	0	0.035716	0	0	0	0.24042	0	0.185849	0.199166
BnaA01g00630D	2.45573	2.57904	2.29351	0	1.11069	0.167817	0.128095	0.546228	0.464766	0.125154	0.482619	6.40473	4.13531	5.51619	0.944387	3.03771	2.34708	4.87667	6.25565	5.56233	0.164148	0.377954	0.215367	1.05281	0.540576	0.669359
BnaA01g00640D	0	0	0	0	0.103181	0	0	0	0	0	0	4.08718	0.380166	0.202782	0	0	0	0	0	0	0	0	0	0	0	0
BnaA01g00650D	0	0	0	0	0	0	0	0	0	0	0	0	0	0	0	0	0	0	0	0	0	0	0	0	0	0
BnaA01g00660D	16.1869	0	15.7573	12.7305	0	0	0	16.375	0	12.4618	13.5457	11.6735	0	0	0	11.2654	11.6365	18.7177	16.8239	0	18.7691	0	0	21.3478	0	18.8266
BnaA01g00670D	0.145476	0	0	0	0.538296	0.23345	0.605021	1.55429	0	0	0	1.32842	0	0.227532	2.55368	1.70534	1.6888	1.33119	1.84292	1.55945	0.815614	0.230586	0.189628	1.17716	2.76146	0.619092
BnaA01g00680D	0.487985	0.608977	0.584589	0.024849	0.142703	0.237714	0.077803	0.087008	0.305166	0.16178	0.083337	0.099432	0.127634	0.188318	0.232287	0.399002	0.54422	0.45508	0.533529	0.237099	0.062402	0.127085	0	2.04226	1.16222	1.27343
BnaA01g00690D	0	0	0	0	0	0	0	0	0	0	0	0	0	0	0	0	0	0	0	0	0	0	0	0	0	0
BnaA01g00700D	1.33	1.3855	1.07716	1.95672	1.87527	2.2856	2.14103	2.02347	0.942278	1.15415	0.65054	2.50585	2.7451	2.97788	1.90839	1.89589	2.31592	1.98965	2.01498	2.78117	1.70131	1.69992	1.97908	1.08377	1.29461	1.98499
BnaA01g00710D	2.16534	2.14405	2.47508	3.93577	2.42902	8.80567	5.59489	6.70794	13.2451	12.0717	5.92965	1.80023	1.14137	4.46729	1.75761	1.45241	3.05335	8.69519	8.76532	12.7388	3.30813	3.91656	4.19786	3.2293	6.65633	5.64802
BnaA01g00720D	0	0	0	0	0	0	0	0	0	0	0	0	0	0	0	0.176525	0	0	0	0	0	0	0	0	0	0
BnaA01g00730D	0.046971	0	0	0	0	0	0.048156	0	0	0.047051	0	0	0.079462	0.102077	0	0	0	0.132205	0	0.211137	0	0	0	0	0	0
BnaA01g00740D	0.054336	0.636997	0	0	0.356238	0	0	0	0.266537	2.26041	1.39374	0.142999	0.166526	0.106719	0.092548	0.140392	0.044274	0.054633	0.053664	0	0	0.055112	0.054667	0	0	0.048286
BnaA01g00750D	0	0	0	0	0	0	0	0	0	0	0	0	0	0	0	0	0	0	0	0	0	0	0	0	0	0
BnaA01g00760D	0.426015	1.01258	0.447567	0.848379	0.339831	8.53637	5.96172	10.6174	0.498498	0.259493	0.127561	2.53659	2.84989	2.36723	0.80801	0.601875	0	0.435592	1.19651	0.657152	4.10691	2.69286	4.01666	0.687881	1.95494	1.03244
BnaA01g00770D	0.307596	0.327463	0.010038	0.007021	0	0.733755	0.620364	0.366533	0.489818	0	0.540595	0.724969	0.907365	0.928449	0	0.009894	0.00451	0.293165	0.438644	0.540107	0.351786	0.567157	0.006682	0.010119	0.011273	0.87799
BnaA01g00780D	3.71757	4.49068	5.23222	5.86174	6.87692	21.3199	23.8501	30.276	8.54179	6.59447	7.50703	10.8143	8.88121	13.7854	22.5059	25.5874	10.8688	4.44361	4.2434	4.48644	21.8483	17.2091	26.7022	2.9866	4.21414	4.55081
BnaA01g00790D	0.980286	0	0.811295	0	0	0.026589	0.011037	0.015371	0	0	0	0	0	0.026879	0	0	0.005129	0.020142	0.010319	0.010823	0.016468	0.020635	0.581759	0	0	0.006798
BnaA01g00800D	12.7637	14.6179	12.3069	11.5558	11.5043	11.7676	12.4497	12.7548	9.86383	9.84313	7.96267	8.97169	8.96793	12.2352	14.428	12.5237	11.2133	14.4236	10.5159	12.7122	13.3072	11.9117	13.325	11.5249	10.0295	9.57371
BnaA01g00810D	0	0	0	0.046442	0	0.046082	0	0.047762	0	0	0	0	0	0	0	0	0	0	0	0	0	0	0	0	0.136767	0
BnaA01g00820D	0	0	0	0	0	0	0	0	0.033062	0	0	0	0	0	0	0	0.035659	0	0	0	0	0	0	0	0	0
BnaA01g00830D	0	0	0	0	0	0	0	0	0	0	0	0	0	0.045579	0	0	0	0.238356	0	0.04816	0	0	0	0	0	0
BnaA01g00840D	0	0	0	0	0	0	0	0	0	0	0	0	0	0	0	0	0	0	0	0	0	0	0	0	0	0
BnaA01g00850D	1.69344	2.51958	1.60227	0.665358	0.738416	0.79124	0.79984	1.41345	0.400144	0.766141	0.978865	1.82349	2.09165	1.46295	5.39898	4.75893	3.85803	4.38203	3.07417	2.63468	1.34437	2.29653	1.75214	2.22964	1.80668	2.03426
BnaA01g00860D	0.503492	1.53008	0.731212	0.570743	0.318048	0.156871	0.315779	1.16962	1.33782	1.57719	0.636199	5.22473	9.10944	3.55591	0.340404	0.428288	0.378154	0.862339	0.691259	1.24116	0	0.629015	0	0.704599	0.793071	0.61598
BnaA01g00870D	0.481694	0.322967	0.308903	0.025761	0.125992	0.174228	0.153246	0.542206	0.017806	0.070489	0.183522	0.078154	0.026102	0	0.135819	0.455476	0.118052	0.23364	0.198221	0.307753	0.266575	0.506818	0.257802	0.826107	0.408346	0.661322
BnaA01g00880D	0.816589	0.573107	0.699208	0.642941	0.70975	0.652485	0.527934	1.00732	0.686997	0.377101	0.577155	1.12325	0.915047	1.13064	0.564637	0.84463	0.305595	1.04489	0.746823	0.868911	0.645773	0.606004	0.803937	1.19786	0.630183	0.866863
BnaA01g00890D	2.95545	3.3427	2.38142	2.65732	2.64426	4.15468	5.42164	6.19375	1.80284	4.32173	2.10225	10.3738	9.42313	12.1206	4.40611	4.25731	3.19111	7.13443	6.6388	6.49819	4.20685	4.81452	3.0894	5.58152	5.0715	4.70282
BnaA01g00900D	1.80885	1.66309	2.55652	10.0042	18.6484	364.786	157.549	192.378	5.1784	4.89612	1.87812	61.8302	79.1092	124.881	13.9449	31.8198	17.9649	82.4811	85.6291	87.6613	102.424	35.3869	55.3365	37.6688	40.5515	44.9528
BnaA01g00910D	0	0	0	0	0	0	0	0	0.035316	0	0	0	0	0	0	0	0	0	0	0	0	0	0	0	0	0
BnaA01g00920D	1.28051	1.00283	2.26836	8.65282	7.50414	20.0925	27.0743	20.7048	1.89883	1.53978	1.55768	10.0447	17.3634	13.1542	2.71504	7.28231	1.80484	5.5065	6.05453	4.97846	3.76906	2.89439	7.34559	2.26557	3.21455	3.61322
BnaA01g00930D	34.2104	34.8411	38.3937	44.2701	36.4828	24.8924	18.0341	23.9291	19.4342	24.2585	21.5052	23.7448	25.4789	35.2261	50.6939	51.7097	32.7215	38.2175	27.8375	35.5673	36.762	42.3659	52.1188	28.5502	28.1162	27.8257
BnaA01g00940D	0.188043	0.162459	0.033327	0.068434	0.127972	0.253834	0.203742	0.131968	0.086432	0.109786	0	0.118557	0.277021	0.354644	0.046225	0.154383	0.155845	0.344639	0.111569	0.145156	0.077335	0.262359	0.124674	0.207605	0.095516	0.145232
BnaA01g00950D	0	0	0	0	0	0	0	0.077884	0	0	0	0	0	0	0	0.21555	0	0	0	0	0.122758	0	0.081304	0	0	0
BnaA01g00960D	0	0	0.041014	0.441945	0.306803	0.314142	0.085821	0.267275	0	0.114418	0.085467	0.449907	0.824789	0.067205	2.85833	2.27349	1.82135	1.57964	0.787051	0.461421	0.069018	0	0	0.315217	0.080769	0.374625
BnaA01g00970D	1.84396	1.43604	1.77456	1.38698	1.02464	3.8923	3.01239	4.22483	1.90879	3.2651	2.03176	4.25144	5.0812	4.78761	1.65736	1.51063	1.50757	2.57212	2.08184	1.86206	2.23789	1.81475	1.69558	1.97864	2.65072	2.6411
BnaA01g00980D	6.01198	5.34932	5.82334	6.00784	5.64908	21.7986	21.729	17.9606	8.46002	8.70707	12.8968	6.44346	5.97223	5.59774	9.4511	9.38081	9.47293	9.03485	9.55014	8.70715	20.8697	21.2996	24.4486	9.42301	14.0352	12.7167
BnaA01g00990D	2.51575	2.54534	2.48084	1.56882	1.37459	2.20814	1.52288	1.49505	2.53116	2.6898	3.04986	2.73761	2.51056	2.88246	1.3995	1.50735	1.60152	2.62694	2.84343	2.6965	2.16644	3.07111	2.01471	1.52518	2.16153	2.36133
BnaA01g01000D	0.382808	0.7844	0.428135	0.276652	0.512973	86.3729	42.3854	41.9978	0.200607	0.382755	1.1608	0	0.153398	0.756354	0.27696	0.916087	0.391526	0	0	0	0.052023	0.213106	0.031341	0	0.349704	0.33729
BnaA01g01010D	0	0	0	0	0.124658	1.39777	3.12249	0.329611	0.05402	0.054531	0	0.081246	0.437622	0.336788	0.052984	0.164037	0	0	0	0	0	0	0	0	0	0
BnaA01g01020D	50.1368	45.4824	47.4542	23.6328	23.0876	8.37156	9.86355	8.29183	25.6716	24.7737	23.5193	3.54788	4.71007	5.79476	31.7438	28.3609	25.4094	16.8498	16.4033	16.9595	13.3441	16.8255	10.5224	14.9634	17.4768	15.7
BnaA01g01030D	1.59252	1.51722	1.40049	0.817261	0.821375	0.923486	1.47826	1.6322	1.15808	1.1895	1.08658	1.15614	1.0651	1.60882	1.09655	1.49694	1.23376	0.753461	1.58897	1.29491	2.13241	2.16295	2.29434	1.18871	1.60804	1.31063
BnaA01g01040D	7.17959	5.76312	7.70851	39.3975	37.4322	7.11306	14.9073	8.75343	3.83867	6.79393	4.79917	6.41212	7.38245	6.32717	8.11184	11.1049	7.71982	4.33393	9.94548	8.16205	11.968	21.6688	13.6942	11.658	10.9081	13.7749
BnaA01g01050D	0	0	0	0.082027	0	0	0.042805	0	0	0	0	0	0	0	0	0	0	0	0	0	0	0	0	0	0	0
BnaA01g01060D	0	0	0	0	0	0	0.069147	0	0	0	0	0	0	0	0	0	0	0	0	0	0	0	0	0	0	0
BnaA01g01070D	0	0	0	0.199021	0.07193	0	0	0.040331	0	0	0	0	0.042586	0	0	0.03992	0	0.015716	0	0	0	0.150561	0	0	0	0
BnaA01g01080D	6.28341	4.12223	5.51371	8.94744	11.8885	10.7033	36.1912	9.69577	14.6156	25.5635	32.2005	23.7102	30.7561	33.4062	7.15372	8.86215	6.70544	5.02365	5.77263	5.78139	29.1826	9.9758	22.2809	3.59829	4.98792	3.48008
BnaA01g01090D	0	0.059757	0	0.067352	0	0.069373	0	0	0	0.132007	0	0	0	0	0	0	0	0	0.135885	0	0	0	0	0	0.063409	0
BnaA01g01100D	5.13358	6.40104	5.93651	23.7421	24.4026	17.4077	15.1711	17.4928	15.2722	11.9754	11.8061	24.1934	21.6619	15.2368	16.255	13.9558	12.6418	12.8787	11.4773	13.5382	10.0498	11.1469	11.4695	10.7758	11.5229	12.1291
BnaA01g01110D	0.022821	0	0	0	0	0	0	0	0.084147	0	0.061791	0	0	0	0	0	0	0	0.061307	0	0	0	0	0	0	0
BnaA01g01120D	5.63105	6.88556	4.81464	1.51017	2.34742	1.35059	1.68853	1.27824	9.25323	8.56571	5.71517	7.62932	8.14102	8.99619	2.30879	2.45415	3.14085	6.66395	9.29639	8.99618	1.85959	1.81054	1.60467	3.40454	3.74745	4.89896
BnaA01g01130D	0	0	0	0	0	0	0	0	0	0	0	0	0	0	0	0	0	0	0	0	0	0	0	0	0	0
BnaA01g01140D	0	0	0.07804	0.03905	0.031015	0.072684	0.246516	0	0	0.177148	0.040724	0.131053	0	0.107327	0.03895	0	0	0	0.039657	0	0.092854	0	0	0	0.120686	0
BnaA01g01150D	13.619	16.6445	12.3217	4.51638	3.47263	2.37487	2.83338	3.12057	9.30698	9.26978	4.86491	3.89275	3.64913	2.87667	6.68701	8.27799	9.99876	15.541	16.1895	16.2676	4.42513	5.08041	1.21686	13.336	13.7073	14.0739
BnaA01g01160D	0.108367	0.1683	0	0	0	0	0.210352	0	0	0	0	0	0	0	0	0	0	0	0	0	0	0	0.679681	0.107638	0.175747	0
BnaA01g01170D	3.66296	2.85758	3.83643	2.91479	3.16529	6.74998	7.07283	8.94065	6.94145	5.69781	4.51613	5.25856	4.71192	4.70662	3.97075	2.58213	3.15813	5.11612	5.55242	5.66911	5.04656	5.45666	4.99478	5.0707	5.2141	5.63789
BnaA01g01180D	6.4188	5.34264	4.01286	3.6586	4.25288	12.2568	9.57878	10.8681	9.05062	4.03775	6.24176	6.70956	8.09224	5.85192	5.1957	5.83373	4.07036	6.23459	5.22894	6.7257	9.10067	6.90509	6.15599	6.42315	6.93168	7.42471
BnaA01g01190D	0	0	0	0	0	0	0	0	0	0	0.083059	0	0	0	0	0	0	0	0	0	0	0	0	0	0	0
BnaA01g01200D	1.1208	1.12528	0.792951	0	0.193291	0.602328	0.443915	0	0.686915	0.216227	1.21561	0	0.158309	0	0	0.148756	0.696167	0.512348	0.143083	0.345572	0	0.192492	0	0.521675	0.489859	1.50408
BnaA01g01210D	0	0.157724	0	0	0	0	0	0	0.78936	0.441306	0	0.191413	0	0	0	0	0	0	0	0	0	0.096215	0	0	0	0
BnaA01g01220D	0.117188	0.269624	0	1.28156	1.05168	0	0.341456	0.124675	0.768731	13.0525	1.7571	7.48204	5.18341	0.893946	0	0.512066	0.243512	0	0	0.17156	0.255664	0	0.408274	0	0	0
BnaA01g01230D	0.10941	0.050969	0.492246	2.38281	4.64748	0.224026	0.493338	0	2.61132	24.4824	8.76388	8.16479	2.47574	0.92951	1.05124	0.353905	0.352909	0.18361	0.308298	0	1.42419	0.189862	2.14841	0	0	0
BnaA01g01240D	1.81749	1.86426	1.81679	1.0765	0.751894	0.100303	0.214608	0.288191	2.36349	1.81739	1.94137	0.672556	0.127151	0.618822	1.23553	1.66997	2.07974	5.80551	2.72171	4.84564	0.901312	2.07905	0.968913	1.40261	1.39063	1.71132
BnaA01g01250D	0.31243	0	0.410976	0.101138	0.129241	0.260321	0.094472	0.281451	0.083759	0.10046	0.085665	0.208803	0.209094	0.216231	0	0.184766	0.048352	0.60213	0.460499	0.575927	0.251593	0.425515	0.6014	0.313241	0	0.491812
BnaA01g01260D	0	0	0	0	0	0	0.022567	0	0	0	0	0	0	0	0	0	0	0	0	0	0	0	0	0	0	0
BnaA01g01270D	0.301382	0.235381	0.355548	0.383678	0.253296	0.784132	0.687504	0.901626	0.3576	0.265705	0.259513	0.526783	0.390274	0.443871	0.26491	0.282041	0.363631	0.442946	0.611981	0.407719	0.512687	0.435936	0.26577	0.8539	0.437191	0.656811
BnaA01g01280D	0	0	0	0	0	0	0	0	0	0	0	0	0	0	0	0	0	0	0	0.11866	0	0	0	0	0	0
BnaA01g01290D	0	0	0	0	0.073748	0	0	0	0	0	0	0	0	0	0	0	0	0	0	0	0	0	0	0	0	0
BnaA01g01300D	2.83571	4.06868	3.22365	1.77161	2.0134	3.75441	1.88279	1.58856	4.44198	4.08438	5.30198	3.63089	2.23084	1.29881	3.04007	1.05753	0.55352	0.50527	0	0.504595	1.97467	2.29049	1.62273	2.74063	4.1396	1.49102
BnaA01g01310D	44.8959	48.6403	39.5478	21.6699	21.7333	12.822	17.0128	18.4656	37.9966	43.5582	37.9687	24.0354	25.1938	23.6829	22.8362	18.9648	19.9188	28.2562	23.0031	23.9246	15.702	16.996	10.5678	33.8696	29.62	33.3005
BnaA01g01320D	0	0.06423	0.034848	0.100723	0.081167	0	0.115138	0	0.165775	0.03629	0	0.207619	0.260987	0.236808	0	0	0.082752	0	0	0	0	0	0	0	0	0
BnaA01g01330D	0.432128	0.669759	0.395423	0.509256	1.16016	0	0	0.309022	0.581651	1.0801	0.085977	1.10404	1.76825	0.599954	0.419689	0	0.61592	1.00191	0.801612	0.931145	0.484753	0	0.328445	0.100314	0.03121	0.528505
BnaA01g01340D	0.987306	1.11957	1.20872	1.25948	0.972319	2.80577	2.80164	2.77563	0.902412	0.942313	0.983274	1.01734	1.12838	0.944036	0.993238	1.06558	0.985415	1.21966	1.45335	1.42947	1.62138	0.970308	1.5867	2.21738	1.22535	1.79225
BnaA01g01350D	0	0	0.05715	0.056538	0.125599	0	0	0	0.060959	0	0	0	0.191244	0	0	0	0	0	0	0	0	0	0	0	0	0
BnaA01g01360D	0	0	0	0.013792	0	0	0	0	0	0	0	0	0	0	0	0	0	0	0	0	0	0	0	0	0	0
BnaA01g01370D	0.968415	0.83447	0.82035	1.03841	0.47722	0.073911	0	0.119454	0.463117	0.319305	0.653188	0.251591	0.127226	0.074059	0.373427	0.300205	1.03574	0.670364	0.952755	0.516088	0.191799	0.531527	0.382005	1.47086	1.11932	0.89039
BnaA01g01380D	0.79476	1.13822	0.809996	1.05999	0.606903	1.41136	0.617987	1.63008	0.715368	0.458633	0.85516	0.069206	0	0	0.433199	0.694783	1.08159	0.353151	0.693081	0.652956	0.225784	0.540837	0.07518	2.13763	2.07018	2.23699
BnaA01g01390D	0	0	0	0	0	0	0	0	0	0	0	0	0	0	0	0	0	0	0	0	0	0	0	0.034858	0	0
BnaA01g01400D	0	0	0	0	0	0	0	0	0	1.52493	0	0	0	0	0	0	0	0	0	0	0	0	0	0	0	0
BnaA01g01410D	0	0	0	0	0	0	0	0	0	0	0	0.109981	0.011763	0	0	0	0	0.008813	0.033668	0	0	0	0.093644	0	0	0.035699
BnaA01g01420D	2.81566	3.60459	2.96738	0.110469	0.037014	4.46861	3.48369	4.78226	0	3.13102	0.049848	1.79573	0	1.44038	0.050772	0	2.17607	3.79812	0	0.140429	0.063958	0.128042	0.022602	5.18624	0	0
BnaA01g01430D	0.569708	0.431921	0.479285	0.349191	0.05352	0.088286	0.236068	0.303805	0.206881	0.450181	0.210614	0	0.086261	0.149926	0.161686	0.455494	0.359342	0.375608	0.551877	0.552608	0.119091	0.37495	0.253688	0.666627	0.403825	0.949821
BnaA01g01440D	0.273626	0.040466	0.554777	1.04359	1.52411	1.1712	0.80992	0.988892	0.27529	0.476098	0.112879	0.820937	0.696289	0.373877	0.227736	0.329286	0.441269	0.420789	0.455088	0.171781	0.795081	0.226127	0.358021	0.282577	0.44189	0.359015
BnaA01g01450D	0	0	0	0	0	0	0	0	0	0	0	0	0	0	0	0	0	0	0	0	0	0	0	0	0	0
BnaA01g01460D	0.176943	0.10191	0.203797	0.047387	0.053576	0.194772	0.067343	0.109761	0.052179	0.03946	0.140151	0.062855	0.068163	0.027276	0.063973	0.052845	0.128974	0.053047	0.242105	0.079694	0.102585	0.149424	0.131816	0.15097	0.217263	0.259669
BnaA01g01470D	13.7801	16.9403	9.01724	3.82945	6.70226	10.6372	9.09959	11.9822	9.95774	17.0756	10.6374	37.0229	61.8942	60.7602	5.60248	8.20116	5.62369	10.6573	12.7379	14.384	5.02064	5.74221	4.55765	8.86257	8.03544	11.4328
BnaA01g01480D	0.261164	0.237842	0.138912	0.08084	0.035985	0.09055	0.060962	0	0.163167	0.071475	0.275595	3.12081	3.05716	3.52997	0.22771	0.212774	0.283385	0.107975	0.450075	0.229684	0.406911	0.558142	0.166145	0.081793	0.068141	0.148819
BnaA01g01490D	0.369116	0.436946	0.95552	0	0.535577	0.120476	0.026856	0	0.231977	1.07504	0	7.46596	4.01779	4.55593	0.147565	0.239726	0	0.482484	0.235981	0.549992	0.440309	0.034218	0.278451	0	0.032716	0.122563
BnaA01g01500D	0.680187	0	0.051481	0	0.135642	0.408226	0	0.240387	0.299184	0.034262	0	0.49619	0.386693	0.527231	0.107355	0.046438	0.466709	0	0	0.162587	0.098784	0	0.175108	0.94622	0.151625	0
BnaA01g01510D	0	0	0	0	0	0	0	0	0	0	0	0.032272	0	0.021528	0	0	0	0	0	0	0	0	0	0	0	0
BnaA01g01520D	0.564013	0.673922	0.529095	0.448099	0.680592	0.960503	1.56334	1.03108	0.925094	0.869208	0.634227	1.32003	1.19449	1.07404	0.723681	0.559925	0.54057	0.942263	0.853078	0.970346	1.44608	1.40499	1.75445	1.15024	0.754085	1.00459
BnaA01g01530D	0	0	0	0	0	0	0	0	0	0	0	0	0	0	0	0	0	0	0	0	0	0	0	0	0	0
BnaA01g01540D	0.777527	0.674217	1.11952	2.30981	2.4793	1.94329	2.98855	2.737	0.537795	0.701629	0.611512	0.315182	0.412454	0.579557	0.586063	0.511319	0.694212	0.760475	1.28018	1.06764	1.21347	1.50923	2.0901	2.16827	1.54028	1.69464
BnaA01g01550D	4.80078	4.50465	9.02059	63.4753	54.8773	45.2531	43.2297	49.7217	6.6977	3.2499	7.04204	1.44429	0.617454	1.21918	15.2417	7.08232	17.9495	10.0923	11.5232	10.724	51.254	60.7088	57.6935	14.7311	25.3732	24.9677
BnaA01g01560D	0	0	0	0	0	0	0	0	0	0	0	0	0	0	0	0	0	0	0	0	0	0	0	0	0	0
BnaA01g01570D	0.041812	0.121105	0.10209	0.160048	0.170404	2.22091	4.5342	2.36886	17.5469	5.05389	18.6411	5.93445	6.38154	3.72949	0.100788	0.533989	0	0.042181	0	0	0.306741	0.133268	0.212513	0	0	0.041604
BnaA01g01580D	0.710015	0.665471	0.268951	0.601889	0.589922	2.28106	2.04503	4.38182	0.613641	0.485407	0.506332	0.062999	0.417346	0.129048	0.843601	0.927739	0.849954	1.03826	1.16341	1.48716	1.10955	0.453739	1.25553	1.46069	1.35351	1.4316
BnaA01g01590D	4.55097	6.5475	5.073	4.59487	2.12389	18.6217	18.246	16.7435	9.53484	5.71325	7.18506	16.3878	18.2455	18.8705	4.98501	4.8562	4.56989	13.419	13.4708	14.0889	9.90926	11.5647	12.2992	7.13315	11.4742	10.1154
BnaA01g01600D	1.67978	1.65809	1.91353	2.12285	2.05719	3.20144	2.57834	3.58335	1.28595	1.23906	2.0549	2.71093	1.06042	0.715299	1.66395	2.67544	3.76833	0.963709	1.87618	1.35822	1.33042	2.91063	2.7349	1.76463	0.949891	1.59836
BnaA01g01610D	0	0	0	0	0	0	0	0	0	0	0	0.169977	0	0	0	0.095454	0	0	0.059728	0	0	0	0	0	0	0
BnaA01g01620D	0.622653	1.15513	0.741706	0.398299	0.545182	1.27312	0.909954	1.40249	1.99317	1.01252	4.0994	4.72511	2.83499	1.30639	0.604107	0.686577	0.362302	0.415546	0.66678	0.920435	0.355487	0.642836	0.873144	0.713139	1.12282	0.009685
BnaA01g01630D	1.84255	2.3043	1.89609	1.05398	0.964998	3.42206	1.803	3.23855	1.58685	1.38483	1.51574	0.544554	0.361501	0.751146	0.760149	1.30933	1.22165	1.00953	1.59881	0.811776	0.91966	0.876757	0.514726	2.90543	2.82903	3.03185
BnaA01g01640D	0.073343	0	0.037438	0.056967	0.204068	1.57775	0.638303	1.31875	0	0.066698	0.074635	0.32697	0.069515	0.107559	0.208183	0.211222	0.068146	0	0	0.102368	0.072665	0.556889	0.403574	0.399108	0.383492	0.490592
BnaA01g01650D	2.96484	2.48364	2.85959	1.90595	2.61309	3.9516	3.6175	3.41346	2.70329	2.21198	2.67938	6.01941	7.50633	6.8287	2.64043	2.78545	2.62519	3.07486	3.50048	3.17416	3.74334	3.04696	3.23777	2.56115	2.1753	2.53984
BnaA01g01660D	1.69228	1.74893	1.70056	0.373143	0.480383	1.62321	0.73099	1.60827	0.673945	1.11027	0.359624	0.538694	0.626602	0.556312	0.806375	1.68823	0.504214	0.139217	1.2041	0.770576	0.751342	0.294766	0.765448	2.4447	1.4759	1.36166
BnaA01g01670D	11.483	13.431	14.3028	28.4537	26.7657	97.6146	94.6766	73.7467	47.1021	34.501	47.5627	48.6297	40.2326	51.6662	22.4086	20.3634	19.3555	19.3041	17.8175	23.8069	51.365	35.1333	55.8269	14.4933	18.4923	19.7007
BnaA01g01680D	0.972924	1.56459	1.27068	0.94227	1.05502	1.56076	1.60499	1.8779	1.33567	1.48683	0.676171	3.44549	4.0094	3.87073	1.06628	1.46645	0.801369	1.18373	1.8713	2.36659	0.59438	0.65387	0.498058	1.01642	0.903104	1.18975
BnaA01g01690D	0.878752	0.625595	0.334045	1.8314	1.63054	3.01221	2.14915	2.19755	1.00552	0.537225	0.635813	1.01335	0.995403	1.51028	0.61458	1.24129	1.40281	0.803181	0.724467	0.798531	1.25687	1.40369	1.33687	0.938515	1.17742	1.21644
BnaA01g01700D	0.049492	1.14436	6.60398	1.56552	0	13.055	7.13282	7.60398	6.70386	0	0.210282	2.73654	2.11924	1.80128	5.4882	0.604483	5.62127	0.971954	3.83707	13.7406	7.66753	7.11545	11.3722	5.67753	0	0
BnaA01g01710D	0	0	0	0	0	0	0	0	0	0	0	0	0	0	0	0	0	0	0	0	0	0	0	0	0	0
BnaA01g01720D	0	0	0	0	0	0	0	0	0	0	0	0	0	0	0	0	0	0	0	0	0	0	0	0	0	0
BnaA01g01730D	0	0	0	0	0	0	0	0	0	0	0	0	0	0	0	0	0	0	0	0	0	0	0	0	0	0
BnaA01g01740D	0	0	0	0	0	0	0	0	0	0	0	0	0	0	0	0	0	0	0	0	0	0	0	0	0	0
BnaA01g01750D	0.131361	0.041173	0.144826	0.496687	0.696248	1.64685	1.26363	0.14964	0.160142	0.154817	0.118954	0.438847	0.471755	0.488823	0.23206	0.185564	0.180675	0.301291	0.701698	0.859255	0.796471	0.454589	0.389437	0.872332	0.460277	0.27693
BnaA01g01760D	0	0	0	0	0	0	0	0	0	0	0	0	0	0	0	0	0	0	0	0	0	0	0	0	0	0
BnaA01g01770D	0.189831	0.399271	0.716682	0.821095	0.45698	0	0	0.400051	0.234959	0	0	0.442674	0	0.104998	4.20477	2.59726	5.10661	4.26565	3.96145	7.50072	0.442339	1.71527	0.203988	0.734306	1.90209	1.8563
BnaA01g01780D	17.3629	17.0722	31.257	145.607	120.172	1035.87	839.061	808.521	57.3319	56.7644	90.353	3.52112	1.99521	6.03699	334.894	221.155	174.784	71.3316	53.2869	75.0537	389.301	331.14	1416.3	60.2601	86.0674	53.831
BnaA01g01790D	6.04147	7.33497	3.86045	6.21169	5.90108	15.0621	12.6323	17.7928	4.76221	5.18701	4.02795	3.3249	2.78681	3.99065	6.23261	7.92247	8.85051	6.33453	6.54425	6.99174	3.33614	7.94156	12.6092	5.99971	5.31863	4.8793
BnaA01g01800D	2.29191	2.38232	3.0222	3.48536	2.93437	44.8594	36.1903	45.9442	3.96845	2.05801	3.47622	6.2793	3.876	4.62685	5.7166	4.00505	2.05992	3.22919	4.70767	4.58438	24.8796	34.6371	52.2361	4.00892	3.62874	3.47115
BnaA01g01810D	1.1605	1.02862	1.24338	1.8342	1.3354	1.66166	1.73721	2.14661	0.931749	1.14197	0.573031	1.38647	0.780048	0.771226	1.36967	1.73694	1.54498	1.02628	1.21568	1.14393	0.618143	0.417557	0.493851	1.32774	1.07666	0.721247
BnaA01g01820D	0	0	0	0	0	0	0	0	0	0	0	0	0	0	0	0	0	0	0	0	0	0	0	0	0	0
BnaA01g01830D	0	0	0	0	0	0	0	0	0	0	0	0	0	0	0	0	0	0	0	0	0	0	0	0	0	0
BnaA01g01840D	0	0	0	0	0	0.149067	0	0	0	0	0	0	0	0	0	0	0	0	0	0	0	0	0	0	0	0
BnaA01g01850D	0	0	0	0	0.130798	0.653843	0.83285	0.440311	0	0	0	0	0	0	0.063	0	0.079442	0	0	0	0.111317	0.06434	0.084725	0.194176	0.049452	0
BnaA01g01860D	0	0	0	0	0	0.120575	0	0.022955	0	0	0	0	0	0	0	0	0	0	0	0.051095	0	0.046337	0	0	0.105456	0
BnaA01g01870D	0.247444	0.263685	0.294656	0.069271	0.19196	0.13297	0.374298	0.475095	2.92491	0.761893	2.26247	1.16029	1.89029	0.580716	0.349789	0.119387	0.114803	0.144441	0.193527	0.164066	0.3003	0.22358	0.791108	0.071644	0.143117	0.029854
BnaA01g01880D	0.243438	0.363564	0.081006	0.052634	0.104803	0.243327	0.5691	0.519654	0.265848	0.351203	0.217372	0	0	0	0.191216	0	0.108695	0	0.040938	0	0.254007	0.148547	0.162263	0.407551	0	0.248006
BnaA01g01890D	0	0.134691	0	0.358258	0	0	0.144808	0	0	0.139372	0.190926	5.20077	0.531596	0.95844	0	0.288614	0	0	0.186967	0	0	0	0.185139	0	0	0
BnaA01g01900D	8.64245	6.88352	8.15384	6.07923	6.74047	11.1049	8.07906	11.2292	7.59506	11.1905	7.58865	26.2081	22.0596	25.3433	7.54427	12.2001	7.106	11.2688	15.4339	16.0929	6.19569	10.17	6.22872	10.367	7.27757	9.52041
BnaA01g01910D	1.08234	0.848375	0.541785	2.58584	2.06084	1.11538	3.13366	1.63408	0.710654	1.76714	0.845454	1.84061	2.76702	2.02242	0.437793	0.623642	0.903535	0.437218	1.06596	0.483942	0.600538	0.380276	0.193023	2.71942	2.65213	2.02037
BnaA01g01920D	0.637437	0.500208	0.59049	0.505246	0.726925	0.603266	1.26725	1.03425	0.766963	0.741588	0.489302	1.40644	1.48588	1.67337	0.808988	0.653594	0.944817	1.02461	1.1935	1.22462	0.795667	0.726091	1.20198	0.422717	0.629548	0.780112
BnaA01g01930D	0.26511	0.223112	0.054848	0	0	0	0	0.144213	0.055727	0	0.226105	0.332808	0.319062	0.694063	0.072468	0.317643	0.170695	0.165794	0.083568	0.19929	0	0	0.113758	0.168278	0	0
BnaA01g01940D	0.936585	0.393476	0.467929	0.258073	0.735751	0.739767	0.615941	1.21273	0.373849	0.150702	0.291878	1.27439	1.76086	0.98816	0.309722	0.524129	0.797636	0.768245	1.13297	1.07622	0.961485	0.953314	0.823231	0.598485	0.521113	0.680194
BnaA01g01950D	0.628479	0.782688	0.850169	0.980166	0.629577	1.25306	1.83709	0.94788	0.317611	0.739762	0.75891	1.34259	1.5165	1.3313	1.1219	0.810134	0.615063	1.12467	1.20533	0.910068	1.01738	0.837413	0.945603	1.14796	1.4875	0.622062
BnaA01g01960D	0.087678	0.081874	0.543764	0.596586	0.580814	1.59404	1.611	1.89866	0.261015	0.087535	0.085653	0	0.177119	0.045557	0.47902	0.350991	0.310671	0.12	0.249647	0.268007	1.12448	1.33633	1.46656	0.924662	1.0838	1.72439
BnaA01g01970D	2.51559	2.73892	2.76966	14.0615	13.8762	12.9603	26.0167	14.6206	0.996881	1.55871	1.118	15.0446	13.246	7.18255	9.27343	5.16785	8.00897	6.34248	5.75044	7.43553	7.47578	9.99122	9.27247	7.35804	9.37102	7.71122
BnaA01g01980D	9.53058	7.60088	6.98586	8.60834	8.9779	9.40433	10.8196	4.92437	10.5543	7.38373	9.20993	4.53752	6.08907	8.12164	11.3157	7.10241	10.6362	19.7435	21.1107	14.2917	8.1473	7.27086	11.606	14.1768	22.9795	10.4346
BnaA01g01990D	10.8687	10.7158	10.4681	5.77607	5.65956	2.04929	3.06252	2.02527	9.40071	12.8151	8.83112	3.17235	2.63004	3.00868	6.19773	3.99097	5.54799	8.59073	8.15636	8.71268	5.21382	6.58549	4.61745	6.39323	8.71336	8.1987
BnaA01g02000D	0	0	0	0	0	0	0	0	0	0	0	0	0	0	0	0	0	0	0	0	0	0	0.05495	0	0	0
BnaA01g02010D	0	0	0	0	0	0	0	0	0	0	0	0	0	0	0	0	0	0	0	0	0	0	0	0	0	0
BnaA01g02020D	0.005178	0.112519	1.21698	0.152645	0	0.649222	0.223038	0.640569	0.058677	0.198618	0.789373	0.104913	0.092831	0	0.042784	0.295524	0.012522	0	0	0.126695	0	0.377424	0	0.00233	0.003421	0.13441
BnaA01g02030D	0	0	0	0	0.064862	0.15824	0.112478	0.032157	0	0	0	0	0.079715	0	0	0	0	0	0	0	0.058009	0	0	0	0	0
BnaA01g02040D	0	0.016839	0	0	0.011675	0	0.011709	0.010632	0.066532	0.044883	0.192389	0.695198	0.500231	0.347638	0.044462	0.011497	0.022743	0.034487	0.025362	0.05489	0.03315	0.011584	0.078547	0	0	0
BnaA01g02050D	15.6564	12.3338	15.3647	15.0312	14.9201	14.2598	17.0793	16.2047	12.1709	10.9705	11.8273	15.9089	15.3604	14.3234	10.1243	7.95602	9.72288	17.6371	16.567	18.5398	15.8497	16.5001	16.747	13.2504	15.6164	14.2855
BnaA01g02060D	9.64577	12.1993	11.5325	10.6913	11.4846	37.7176	26.0059	32.8923	7.57229	8.05045	7.42553	9.67437	2.99895	4.41952	8.86538	10.9211	16.619	3.48293	10.6431	5.05719	8.64295	3.3335	5.8757	16.6296	15.5735	21.7459
BnaA01g02070D	2.02719	1.69616	1.20243	0.556217	0.382941	0.961228	1.01508	1.48761	1.70772	1.58464	0.457514	0.842152	1.02273	1.53295	1.22553	1.77946	1.26261	1.88011	2.0172	1.74057	0.98616	1.1099	1.03544	3.44614	2.4448	2.47179
BnaA01g02080D	10.5715	11.568	7.52616	1.61862	2.85972	0.38805	0	0	10.6575	12.8111	5.38945	9.12027	11.9519	10.3947	6.10771	11.1292	13.2028	9.19439	8.16943	5.95875	0.135034	0.06889	0.205228	9.94109	5.7711	3.58711
BnaA01g02090D	8.92266	7.8883	8.11276	12.1244	10.4895	18.6521	14.0992	23.8361	47.2304	37.1434	60.1095	42.253	45.592	22.3775	52.6112	87.793	30.5247	6.77256	9.61467	8.25601	22.2383	21.1221	29.6444	10.5601	9.58146	9.08818
BnaA01g02100D	1.93233	2.19977	1.82316	1.09443	1.23154	2.43071	2.02917	4.12022	5.56154	3.51729	3.85525	18.6721	19.5231	12.9594	3.0564	4.90872	1.97311	4.03262	4.13576	4.72224	2.18211	2.2127	2.1287	4.1791	3.2692	4.55277
BnaA01g02110D	0.781553	0.792638	0.685551	0.265414	0.15424	0.384234	0.301043	0.741727	1.2968	0.772184	1.10026	0.337692	0.251898	0.678542	0.753443	1.39757	0.301835	0.289762	0.5065	0.547788	0.687615	0.658042	0.436294	1.03242	0.524864	1.56643
BnaA01g02120D	0.802874	0.410708	0.581499	0.209743	0.342152	0.707609	0.56082	1.63672	1.96755	1.45413	1.3057	0.247888	0.380799	0.352686	0.773935	1.07297	0.624028	0.700853	0.398126	0.639162	0.591802	0.626704	0.579679	1.4392	1.14778	1.10693
BnaA01g02130D	0.167895	0.236546	0.187297	0.319593	0.178081	1.19307	0.741825	1.16998	0.211074	0.241557	0	0.080848	0.086727	0.210144	0.108698	0.292957	0.271853	0.383318	0.909264	0.504949	0.490577	0.551749	0.374743	0.53574	0.437172	0.348841
BnaA01g02140D	0	0	0	0	0	0	0	0	0	0	0	0	0	0	0	0	0	0	0	0	0	0	0	0	0	0
BnaA01g02150D	0	0	0	0	0	0	0	0	0	0	0	0	0	0	0	0	0	0	0	0	0.302777	0	0	0	0	0
BnaA01g02160D	0.059575	0.025281	0.10133	0.143151	0.093566	0.457782	0.070454	0	0.043651	0.02366	0.228843	0.569635	0.497977	0.357725	0.112439	0.09564	0.044296	0.258471	0.08468	0.159076	0.061842	0.417513	0.096477	0.248231	0.115374	0.279009
BnaA01g02170D	2.88224	3.70111	3.7849	3.8354	3.20437	7.14435	6.04948	7.52546	3.39429	3.60006	3.67716	4.19778	4.66933	3.67669	3.91757	3.32151	3.83662	4.22394	6.50887	5.55212	5.1837	7.03883	6.30982	4.99652	5.20496	5.82255
BnaA01g02180D	1.96081	2.47967	1.94759	2.09149	2.55526	3.98093	7.96216	1.96343	1.81075	1.71379	1.65292	8.77693	9.37829	7.88527	4.45522	3.95766	4.06973	3.02141	1.94433	2.64782	3.20295	2.12979	3.43669	2.05157	1.9267	2.06803
BnaA01g02190D	4.28858	4.98083	3.91435	5.45636	8.17642	7.88125	13.3596	6.48666	6.04917	6.4976	9.02448	23.2101	26.6078	24.9865	10.3948	9.25673	10.2368	16.5756	10.3733	14.0195	9.14409	10.0202	11.5596	4.40792	5.28934	4.50697
BnaA01g02200D	0.302029	0.57879	0.360256	0.099728	0	0	0.086737	0.177777	2.31456	1.7017	1.35164	0.152193	0.841061	0	0.039524	0.122639	0.233409	0	0.085512	0	0.257346	0.502847	0.143475	0.159043	0.559595	0.301311
BnaA01g02210D	0.586564	0.833707	0.77253	0.06896	0.11939	0	0.095854	0.13765	1.10841	0.631003	0.673942	0.119589	0.198017	0.148556	0.318334	0.093315	0.362821	0.047321	0.537388	0	0.41696	0.540953	0.263164	0.492972	0.839183	0.172111
BnaA01g02220D	7.44034	7.95244	5.56528	2.9229	3.28298	0.89608	2.12798	1.82923	6.19408	7.15318	8.57255	0.756383	1.82426	1.40763	2.83006	5.48707	3.38353	2.26333	4.89809	2.97985	2.17095	2.48499	2.16737	7.19699	5.57758	7.61686
BnaA01g02230D	0	0	0	0	0	0	0	0	0.019952	0	0.020461	0	0	0	0	0.019769	0.020395	0	0	0	0	0	0	0	0	0
BnaA01g02240D	4.10321	6.10758	3.17408	4.29452	5.1032	1.00612	1.96753	1.30951	15.2369	22.1313	13.5362	5.83486	5.124	4.58257	4.28238	1.94515	3.49885	5.78727	6.57481	7.34913	2.53311	4.72428	4.78811	7.49179	7.27129	8.00227
BnaA01g02250D	0	0	0	0	0	0.62513	0.080559	0	0	0	0	0.45174	0.163353	0.222571	0.187995	0	0	0.158539	0.155729	0	0.044646	0	0	0.420713	0.841256	1.54188
BnaA01g02260D	2.49728	2.85228	2.39698	2.75267	3.07611	5.57299	5.38034	6.40418	3.33131	2.54193	2.19833	5.89431	5.6953	7.80527	3.72584	4.98023	2.89223	7.12545	7.33481	6.66226	5.03856	4.03343	4.63991	5.59926	4.42269	6.01081
BnaA01g02270D	3.11665	1.77311	4.41005	1.11598	0.785691	3.93265	6.79292	5.24279	5.94335	3.72866	6.84368	2.80372	4.88598	4.41341	28.9328	36.3325	7.68191	0.276164	0.759453	0	6.3228	5.88305	2.70421	0	1.43109	1.30299
BnaA01g02280D	0	0.037808	0	0	0	0	0.056831	0	0.083365	0.030213	0.111636	0	0.031723	0.031661	0.073985	0	0	0.025254	0.030292	0	0.060776	0	0.027978	0	0	0
BnaA01g02290D	1.87562	1.97324	1.34378	0.590944	0.619472	2.55103	3.60387	3.17011	2.00682	2.13116	1.49635	7.95653	14.3805	8.58709	1.05089	0.966556	0.709678	2.12479	1.7415	2.11875	1.36664	1.28531	1.72174	1.57795	1.39034	1.86375
BnaA01g02300D	1.73618	1.69522	1.7106	7.60518	10.4278	37.5782	51.4754	28.2211	1.7842	1.37605	1.02078	27.1843	21.6988	31.5116	5.96857	5.36313	5.84128	7.63877	5.16237	6.08689	38.2235	17.8847	43.9089	3.04901	3.90972	3.60704
BnaA01g02310D	0	0	0	0	0	0.12429	1.0901	0	0	0	0	0.238577	0	0	0	0	0	0	0	0	0	0	0	0	0	0
BnaA01g02320D	0	0	0	0	0	0	0	0	0	0	0.037569	0	0	0	0	0.046539	0	0	0	0	0	0	0	0	0.11413	0
BnaA01g02330D	0.584366	0.713584	0.779888	0.913007	0.224545	0.266133	1.16406	0.166605	0.86417	1.47376	1.08378	2.0935	1.63794	1.58671	0.0828	1.10164	0.855514	1.02736	1.3299	0.580893	0.8649	0.512603	1.52799	1.39373	2.02854	1.15443
BnaA01g02340D	45.1846	44.1143	42.5967	25.6954	22.5413	16.1344	12.5214	16.2586	21.8794	16.7107	10.3445	34.2373	38.4753	34.7514	21.275	36.9448	35.0133	23.974	38.4363	28.1264	8.49029	10.2369	4.94542	27.1641	18.419	32.8496
BnaA01g02350D	0	0.030012	0.060245	0	0.031635	0.123886	0	0.146237	0	0	0	0.244993	0.259305	0.774812	0.02786	0.129019	0.170803	0.638733	0.180445	0.685552	0	0.242497	0.161187	0.029087	0	0.031747
BnaA01g02360D	0	0	0	0	0	0	0	0	0	0	0	0	0	0	0	0	0	0	0	0	0	0	0	0	0	0
BnaA01g02370D	29.2594	32.9139	10.7485	8.18281	8.7273	6.10553	9.06737	7.70225	16.6465	24.0905	17.8877	3.27212	3.15585	2.59586	7.72567	5.47191	8.31111	11.3192	10.4338	10.8724	6.7559	7.69288	5.82334	22.1457	20.7846	22.0224
BnaA01g02380D	0.136778	0	0	0	0	0	0.149723	0	0	0.203409	0	0	0	0	0	0	0	0	0	0	0	0	0	0	0	0
BnaA01g02390D	0	0.522599	0	0	0	0	0	0	0	0	0	0	0	0.168839	0	0	0	0	0	0	0	0	0	0	0	0
BnaA01g02400D	0	0	0	0	0	0	0	0	0	0	0	0	0	0.177128	0	0	0	0	0	0	0	0	0	0	0	0
BnaA01g02410D	0	0	1.37878	0	0	0	0	0	0	0	0	0	0	0	0	0	0	0	0	0	0	0	0	0	0	1.27488
BnaA01g02420D	2.86912	2.64051	2.20589	0.046442	0.288696	0	0	0	0.41097	0.645015	1.13315	0.083474	0	0	0.982565	0.675498	1.07097	0.09539	0.093699	0	0.163549	0.190532	0	0.616149	0.28515	0.462314
BnaA01g02430D	0.648914	1.15688	1.43381	1.02951	0.90659	1.26114	1.85341	2.21842	0.899227	2.09917	2.40078	2.29309	2.57222	1.71537	0.994921	1.3303	0.496872	0.115782	0.211571	0.550129	0.865023	0.946745	1.44873	0.350647	0.154205	0.803374
BnaA01g02440D	16.8497	17.7401	17.6523	6.41984	5.66821	1.56247	3.14761	3.64629	33.2629	40.7056	29.9983	12.691	20.7477	12.0216	12.578	8.76122	8.92245	5.34448	6.06855	5.73424	5.54411	5.72781	4.75273	10.9888	10.5472	12.1165
BnaA01g02450D	0	0	0	0	0	0	0	0	0	0	0	0	0	0	0	0	0	0	0	0	0	0	0	0	0	0
BnaA01g02460D	9.69943	7.99691	7.67885	3.37968	3.79794	0	2.91765	0	4.39457	4.70947	5.01473	0	0	0	3.68401	5.17474	2.46256	1.58165	1.28446	0	3.1057	3.58995	1.23446	5.03681	2.30821	2.68371
BnaA01g02470D	0.434097	0.742738	0.281596	0.638769	0.321404	0.917686	0.458222	0.393322	0.205639	0.314934	0.095301	0.306832	0.516382	0.220473	0.140159	0.438934	0.892776	0.137596	0.493564	0.346259	0.373849	0.431851	0.649386	0.513742	0.402629	0.956566
BnaA01g02480D	1.17017	1.61117	1.00832	0.572463	0.724232	0.25885	0.393808	0.483894	1.82329	3.80118	4.10034	0.912677	0.778328	1.44039	0.681392	1.33831	0.7376	0.75703	1.61489	1.33921	0.156457	0.752647	0.936096	1.47269	1.65853	1.51006
BnaA01g02490D	5.98491	4.55177	4.80612	1.35133	2.73298	3.99325	5.54572	5.47316	4.60192	7.10286	4.68243	13.9268	20.5328	18.9977	2.41608	2.75665	2.3266	3.17776	5.94224	4.46971	1.8681	2.30477	1.17244	7.4658	6.0365	7.1517
BnaA01g02500D	1.76136	1.90672	2.144	1.42094	2.46834	2.26568	3.28134	1.99561	3.16444	2.42038	2.99562	4.24225	5.11811	3.62274	1.2523	2.02677	2.22566	2.82834	2.76919	2.84727	2.42183	2.09587	1.54255	1.92715	2.00415	1.84707
BnaA01g02510D	0.371591	0.176239	0.240413	1.75922	3.15848	12.0658	11.3658	12.7107	5.26217	4.37365	3.174	16.3184	12.2391	10.3805	0.613746	0.488873	0.497843	1.95002	2.0416	1.37059	1.97666	0.53837	1.0456	1.58556	1.58734	1.64532
BnaA01g02520D	0.477696	0.632518	0.412411	1.62234	1.19383	1.94715	1.34884	1.45444	0.271895	0.535195	0.551865	1.14383	1.26018	1.58674	0.870179	1.33892	1.6126	3.7759	2.00347	2.01543	1.0048	0.678073	0.747576	0.908709	1.08983	0.68462
BnaA01g02530D	0.206691	0	0	0	0	0	0	0	0	0	0	0	0	0	0	0	0	0	0.239677	0	0	0	0	0.472149	0	0
BnaA01g02540D	37.0866	56.2963	32.55	10.7459	8.38156	5.9534	5.91167	4.65396	20.8678	25.2079	16.5461	2.02956	4.29056	2.45487	11.8747	11.0091	12.7913	8.51389	11.0383	10.0215	2.90483	4.9372	3.03946	22.4414	26.5911	36.1502
BnaA01g02550D	0.262816	0.487439	0.157842	0	0	0	0	0	0.728159	0.120763	0.401574	0.358244	0	0	0	0	0.697008	0	0	0	0	0.935029	0.80239	0	0.121189	0
BnaA01g02560D	0	0	0	0	0	0	0	0	0	0	0	0	0	0	0	0	0	0	0	0	0	0	0	0	0	0
BnaA01g02570D	4.60744	7.71177	3.70056	29.4029	50.9903	67.636	54.2274	49.2079	6.44993	11.3651	6.01151	82.4577	90.3535	89.0601	24.088	17.9082	28.7734	116.226	66.8237	96.0853	31.226	39.9957	35.218	33.7082	30.5407	37.3446
BnaA01g02580D	0	0	0	0	0	0	0	0	0	0	0	0.020357	0.021067	0	0	0.019263	0	0	0	0	0	0	0	0	0	0
BnaA01g02590D	1.80188	1.83123	1.58811	0.661555	1.01624	0.958284	0.820283	1.1594	1.08318	1.30523	0.928109	1.45208	1.83712	1.54606	1.07529	0.976949	0.906215	1.90802	2.06951	1.78408	0.800498	0.540823	0.32867	1.65125	1.50123	1.71223
BnaA01g02600D	2.18731	1.91456	2.06967	1.93494	1.60435	4.07452	2.43452	1.9333	0.309819	0.976662	0.537969	1.51084	1.13468	2.24505	1.56282	0.470317	1.54747	1.06213	1.37402	1.27187	1.09831	1.54151	1.92655	2.09254	0.988	2.4879
BnaA01g02610D	1.72448	1.16803	1.24938	0.60653	0.255109	0.056194	0	0	0.789871	0.437406	1.03018	0	0.057246	0	0.613101	1.11967	0.630621	0.219225	0.931163	0.481306	0.388868	0.39394	0.366291	1.06187	0.943471	1.48616
BnaA01g02620D	8.67077	4.29698	9.57291	1.35726	3.83603	6.79913	2.99905	5.37471	1.51908	1.46368	2.0424	1.22569	0.488514	0.987739	9.70291	10.7564	10.0102	2.75255	5.31682	3.32177	8.28737	10.5738	7.03901	7.22663	10.7769	13.6398
BnaA01g02630D	0.925316	0.69913	1.09029	0.451491	0.170721	0.419798	1.24588	0.88226	0.428934	0.760596	0.401151	0.680529	0.289262	0.077245	0.650879	0.830089	0.914736	0.335324	0.513771	0.075906	0.333003	0.529516	0.538	1.15803	0.55543	0.928614
BnaA01g02640D	0	0	0	0.958713	0.023519	0	0	0	0.401053	0	0	0	0	0	0	0.001345	0	0	0	0.147096	0	0	0.00069	0	0	0.332447
BnaA01g02650D	1.4866	1.31185	5.9209	0.803874	0.292603	2.26071	0.168359	0.421202	0.90717	7.91387	4.78069	1.80365	0.100241	0.101965	0.84276	0.577325	4.25099	0.993248	1.75175	1.53269	0.413899	1.06477	0.539589	0.098224	13.8142	0.777198
BnaA01g02660D	6.17596	7.23977	4.51394	7.62905	8.024	18.768	15.5691	13.1309	11.9002	11.7821	15.9104	25.2543	23.7623	23.3905	7.63511	9.15354	8.44148	12.5784	10.6742	12.7634	13.873	11.9413	14.3778	7.03244	6.68509	7.49544
BnaA01g02670D	10.8916	11.5183	9.63014	11.7692	11.2152	19.6684	19.3701	21.5581	12.8923	14.653	13.6879	25.0853	26.2423	24.2529	10.0198	10.9803	10.0887	20.9233	23.274	21.9115	15.3947	17.5354	14.2725	15.9286	14.1653	14.6448
BnaA01g02680D	0	0	0	0	0	0	0	0	0	0	0	0	0	0.020208	0	0	0	0	0	0	0	0	0	0	0.028812	0
BnaA01g02690D	0.913379	0.862445	0.718621	0.742658	0.903996	2.48547	2.11902	2.22872	0.715054	1.09893	0.889518	1.93299	1.74753	1.35755	0.653118	0.724123	0.888951	1.21741	1.23803	1.52299	1.19256	1.44671	1.38082	1.41287	1.26616	1.49265
BnaA01g02700D	0	0	0	0	0	0	0	0	0	0	0	0	0	0	0	0	0	0	0	0	0	0	0	0	0	0.057719
BnaA01g02710D	0	0	0.109994	0.109583	0	0.185134	0	0.25438	0.222606	0.136355	0.092321	0.043771	0	0	0.319422	0.314247	0	0	0.135462	0.046751	0.042172	0	0.069321	0.181236	0.21761	0
BnaA01g02720D	0.462063	1.22798	0	3.20705	2.41926	0.536286	4.38056	1.11884	0.347887	0.495418	1.08743	1.10291	0.560169	0.141002	0.059487	0.135359	0.96685	0.596611	1.32978	0.818361	0	0	0.33193	0.071383	0.036864	0
BnaA01g02730D	0	0	0	0	0	0	0	0	0	0	0	0	0	0	0	0	0	0	0	0	0	0	0	0	0	0
BnaA01g02740D	4.21815	4.92072	4.12786	5.03193	5.72867	6.5219	6.46027	6.93311	7.05935	9.11627	10.5578	10.8568	9.36476	7.62626	4.29781	4.76737	4.29532	6.0717	5.61725	6.68915	7.03766	6.11866	8.27643	5.61465	6.08589	5.56729
BnaA01g02750D	1.55594	1.81723	1.35222	1.23959	1.96685	1.87509	2.21288	2.45981	1.70623	3.47709	5.0312	4.49857	3.59827	3.51366	1.59038	2.49622	2.15634	2.01607	2.06299	2.58958	1.91447	1.28521	2.36153	2.21589	3.42912	2.17672
BnaA01g02760D	0	0	0	0	0	0	0	0	0	0	0	0	0	0	0.018644	0	0	0	0	0	0	0	0	0	0	0
BnaA01g02770D	3.29021	2.28758	3.43125	3.73359	3.49568	7.34245	7.08089	8.98616	3.3909	3.96589	3.84178	4.86832	4.45538	3.98825	2.49787	2.36512	2.41973	4.12866	4.88518	4.71491	4.94713	6.34852	6.60283	4.88633	5.36734	6.51839
BnaA01g02780D	21.7544	19.7599	19.7816	36.9358	35.4371	7.31357	16.0654	9.93209	29.6435	26.663	28.0276	26.6833	26.9785	19.0171	23.211	15.8	19.0339	45.0095	34.4408	37.2889	16.5312	21.4413	12.7646	26.7176	21.3747	19.3633
BnaA01g02790D	1.3569	1.40568	1.07855	1.26576	1.27002	1.46752	2.5563	2.05025	1.29587	1.25797	1.07526	1.48091	1.33676	1.70172	1.1865	1.16377	1.38249	1.37093	1.40741	0.924315	0.710422	1.30581	1.31396	1.53788	1.62468	1.44863
BnaA01g02800D	0	0.006736	0.020787	0	0	0.020979	0	0	0	0.006259	0	0.060758	0.011053	0	0	0	0.043862	0.014952	0	0	0	0	0.005638	0.310591	0.012812	0.088128
BnaA01g02810D	21.5612	29.0162	19.4194	11.1444	10.1497	7.27062	8.2751	8.98787	12.5292	15.4314	8.58131	4.60956	7.1407	6.06418	11.4985	8.75758	11.0364	11.5512	7.83438	13.447	3.83779	6.68907	4.40439	14.5377	17.6793	18.4125
BnaA01g02820D	0.591505	0.889919	0.15654	0.769819	1.1341	2.10404	2.38118	3.21516	0	0.446463	0.839825	2.0787	0.435246	1.15853	0.487021	0.979146	0.356228	1.25194	2.16951	0.492002	1.61269	1.24178	0.671531	1.46215	1.66241	0.790016
BnaA01g02830D	3.60522	2.89697	3.17715	3.29433	2.96931	6.75927	9.1852	4.29106	2.48126	3.31967	3.00575	5.80981	7.02919	4.93287	1.66465	2.22791	1.9439	3.35008	2.6831	1.92156	1.35764	2.84908	1.98956	3.82582	5.07754	3.95949
BnaA01g02840D	1.85372	1.04586	1.08615	1.21603	1.03421	2.223	1.92954	3.42263	1.74636	1.01863	2.16189	2.00918	1.71027	1.62934	1.14333	0.878404	1.87651	2.18785	1.51702	1.94528	1.27333	1.23624	1.50726	2.1711	1.48344	2.04142
BnaA01g02850D	0.714084	0.750019	0.537452	0.344245	0.195847	0.476891	0.724628	0.651382	0.589097	0.450541	0.481095	0.373473	0.89476	0.865161	0.66425	1.17486	0.387238	0.720188	0.466534	0.777169	0.254444	0.685963	0.310377	0.589944	0.804536	0.66531
BnaA01g02860D	20.2786	23.2	17.4603	9.30833	9.03268	1.18082	3.14582	2.44983	14.2288	17.6138	18.4229	1.88144	1.60142	1.38551	12.2083	10.1675	10.634	2.62665	4.52093	2.73399	5.1451	6.32443	2.21235	15.737	14.6941	18.0018
BnaA01g02870D	0.082965	0.040775	0	0.040749	0	0	0	0.041908	0	0	0.042213	0	0.043047	0.042964	0.11049	0.328919	0	0.031526	0	0	0	0	0	0.147668	0	0
BnaA01g02880D	44.9648	52.1444	34.2708	25.2422	25.8304	7.25229	8.9324	8.35827	78.5266	53.0494	51.2169	25.26	30.7314	29.8604	18.4396	12.6358	19.1709	43.0986	29.9364	40.3818	16.8719	18.2123	10.8366	30.8068	27.6496	27.4976
BnaA01g02890D	0	0	0	0	0.302762	0.045431	0.08286	0.054433	0	0.048575	0.109293	0	0.165503	0.083428	0	0	0	0	0	0.054273	0	0.053557	0	0	0	0
BnaA01g02900D	3.09593	4.08072	2.77213	9.76833	14.0208	6.90013	10.6812	5.09731	6.59588	6.5907	5.43784	11.0888	11.7913	11.7313	1.78713	2.04609	1.78465	4.75436	5.92821	5.31112	6.09239	6.79136	5.04254	3.39823	4.11055	1.85672
BnaA01g02910D	11.0836	9.08973	8.75618	1.56224	1.39635	0.400542	0.688597	0.335471	4.31963	6.12716	4.17328	0.502435	0.478481	0.46117	2.45567	1.22341	3.68049	4.28517	5.3944	4.18376	4.14351	8.90521	4.65748	9.39836	11.4179	11.4655
BnaA01g02920D	0.046483	0	0.012699	0.01308	0	0	0.000536	0.01527	0.04794	0.019105	0.258549	0	0	0	0	0.32009	0	0.026768	0	0.044758	0.000245	0.020133	0	0	0.043764	0.054531
BnaA01g02930D	0.061783	0.031759	0	0	0.099091	0.03017	0.066251	0	0.099422	0.226341	0.049319	0.064582	0.060843	0.033576	0.057182	0.032526	0.028354	0	0	0	0	0	0.032616	0.048355	0.031397	0.167504
BnaA01g02940D	215.721	262.009	227.751	221.733	219.322	134.23	157.405	163.381	195.361	206.093	152.826	112.504	130.127	163.692	282.275	228.797	260.601	157.988	135.015	146.985	182.475	190.899	154.088	198.861	210.213	239.502
BnaA01g02950D	9.01793	9.50442	9.12673	9.24588	10.9259	14.9231	15.2259	14.2199	7.62918	7.5167	7.1472	20.4405	18.516	25.4858	13.0775	15.2615	14.3888	23.0528	15.0664	17.8406	11.8213	13.2597	13.6275	11.7596	10.4511	9.81202
BnaA01g02960D	0	0.232678	0	0	0	0.044857	0	0	0	0.115012	0	0	0	0.059658	0	0	0	0	0	0.058624	0	0	0	0	0	0
BnaA01g02970D	0.115186	0.256909	0.197254	0.07038	0.210371	0.047756	0.052877	0.064262	0.220367	0.311754	0.053177	1.03268	1.01461	1.12903	0	0.083693	0	0.197968	0.180143	0.320381	0.099003	0.078468	0	0.120243	0.124257	0.400996
BnaA01g02980D	2.42747	1.78348	1.52083	2.67146	4.54424	3.19219	2.26292	2.56919	14.0028	12.1948	45.6272	11.7644	5.1024	3.64665	2.49438	4.06944	1.99582	1.69192	1.76601	1.32296	2.91657	2.74555	3.8189	2.58084	2.62702	2.73081
BnaA01g02990D	0.320271	0.377103	0.042772	0.11585	0.077442	0.344691	0.261141	0.330074	0.175499	0	0.151405	0.326282	0.193388	0.38323	0.138671	0.132825	0.169286	0.321874	0.17728	0.372186	0.275892	0.277384	0.246284	0.242468	0.213241	0.320411
BnaA01g03000D	0.08367	0.038577	0.082778	0.08402	0.089632	0.182908	0.117877	0.095135	0.092805	0.045168	0.099419	0.095137	0.088711	0.09632	0.093413	0.083009	0.070384	0.079066	0.093711	0.105717	0.121399	0.075379	0.045096	0.071849	0.109639	0.099184
BnaA01g03010D	3.96401	2.7877	4.11031	2.4415	2.94822	3.61833	5.79583	3.57081	34.1458	22.0127	46.218	14.3083	10.658	5.4807	3.82758	4.85121	2.01262	2.3057	4.63598	3.62446	3.82045	3.37599	3.93536	2.5919	2.87019	2.96438
BnaA01g03020D	0.197514	0.192588	0.144807	0.798528	1.98378	4.80091	8.54119	1.02984	0.097605	0.37348	0.272467	15.8436	11.1359	11.8879	0.268374	0.199096	0.100437	0.848174	0.392757	0.508012	0.343728	0.220822	0.284943	0.237108	0.253493	0.456628
BnaA01g03030D	0	0	0	0	0	0	0	0	0	0	0	0	0	0	0	0	0	0	0	0	0	0	0	0	0	0
BnaA01g03040D	0	0.141495	0	0	0	0	0	0.212079	0	0	0	0.502804	0.260917	0.18599	0.413541	0.325804	0	0	0	0.25651	0.244097	0	0	0	0.144703	0
BnaA01g03050D	11.4554	11.9149	10.5821	9.36675	9.74982	11.0259	13.0427	15.7832	12.3008	14.2457	14.4788	8.24479	8.40457	8.2106	11.2314	9.24535	10.1729	15.2319	14.4479	16.8423	9.7462	13.1686	11.6904	11.6904	10.7434	13.6155
BnaA01g03060D	3.57235	3.92997	3.56842	4.5948	6.06903	6.88876	9.52194	6.38973	6.2869	5.64166	6.3011	6.50464	7.20438	5.98066	3.96825	4.58101	4.32372	6.35538	7.41894	6.3239	6.64055	6.14663	6.33589	4.2097	4.549	5.07211
BnaA01g03070D	0.407059	0.186925	0.345659	0.502807	0.482152	1.25554	1.30337	1.64158	0.640712	0.294794	0.21005	0.26954	0.186352	0.574244	0.53031	0.440082	0.321934	0.494424	0.421942	0.459516	0.945046	0.597176	0.732007	0.636342	0.339232	0.620773
BnaA01g03080D	0	0	0	0	0	2.75705	1.91803	1.87813	0.324029	0.750787	1.31639	0	0	0	0	0.271922	0	0	0	0.166245	0.380972	0	0	0	0.228684	0.110472
BnaA01g03090D	0.180168	0.182876	0.183212	0.028408	0.154815	0	0.029649	0.029216	0.171992	0.106798	0.188834	0	0	0.037566	0	0	0.029235	0.014587	0.130487	0	0.057304	0.058665	0	0.054269	0.029071	0.116095
BnaA01g03100D	2.07134	2.00856	1.17524	0.460427	1.33794	1.51804	1.89767	1.56352	1.04873	1.26	1.10115	2.45701	2.92864	2.88031	0.412764	1.06662	2.86117	2.10008	2.79572	2.29146	1.46768	1.6406	1.0582	3.41734	3.40598	3.25801
BnaA01g03110D	0.743135	0.558631	1.06761	2.04608	1.00646	1.36271	0.759005	0.749596	1.01855	0.671375	0.718067	2.69854	2.72975	2.85233	1.57499	1.58651	1.57504	3.40864	2.03462	2.66119	1.37233	2.10535	2.23783	1.75404	2.18362	1.52303
BnaA01g03120D	1.5673	2.00095	1.48678	0.904173	0.642322	1.69708	1.34526	2.27903	0.933786	1.06867	1.34489	1.68798	2.05358	2.09906	1.62698	1.45517	1.39996	1.68698	1.85204	2.56892	1.20779	0.821617	1.18471	2.1928	1.36284	1.26284
BnaA01g03130D	0.283346	0.579195	1.24207	1.51899	1.43328	1.62217	2.815	2.06783	1.50558	0.531072	1.52315	2.29357	2.33365	1.83628	1.0685	1.4465	0.900135	1.48204	2.24984	1.93148	1.50553	0.906336	1.54695	0.866603	0.812951	1.03029
BnaA01g03140D	0	0	0	0	0	0	0	0	0	0	0	0	0	0	0	0	0	0	0	0	0	0	0	0	0	0
BnaA01g03150D	12.2189	21.9572	9.34629	6.80995	7.27601	4.77472	5.35064	4.32966	11.9725	10.8479	6.76879	40.8484	51.5061	37.8926	3.43446	7.07345	4.61239	17.6985	14.7136	9.82114	3.47755	4.18676	2.4985	5.26529	4.93048	8.2757
BnaA01g03160D	0	0	0	0	0	0	0	0	0	0	0	0	0	0	0	0	0	0	0	0	0	0	0	0	0	0
BnaA01g03170D	0	0.09433	0.056586	0	0	0	0	0	0	0	0	0	0	0	0	0	0	0	0.094078	0	0	0	0.024218	0	0	0
BnaA01g03180D	0	0.062818	0	0	0	0	0	0	0	0	0	0	0	0.097156	0	0	0	0	0	0	0	0	0	0	0	0
BnaA01g03190D	0	0	0	0	0	0	0	0	0	0	0	0	0	0	0	0	0	0	0	0	0	0	0	0	0	0
BnaA01g03200D	100.075	128.082	74.1968	8.49094	7.44671	2.76251	2.89188	8.83664	13.1568	12.6041	7.76856	1.12502	0.051636	1.59689	28.2337	19.7128	71.2945	19.1849	26.1257	6.76345	3.25955	8.44697	2.22336	46.87	24.0736	22.8189
BnaA01g03210D	1.96773	2.46295	1.20935	1.14825	1.84306	3.43762	1.83006	3.72061	2.60876	1.25442	1.15645	5.74289	4.48567	8.80068	2.82815	3.31571	3.78632	7.90373	8.41202	9.43461	2.73999	3.53643	4.80122	1.85728	3.09497	2.08663
BnaA01g03220D	0.292982	0.057739	0.183772	0	0.044388	0.666415	0	0.248365	0.004834	1.23536	0.002961	0.700259	0.025534	1.00306	0.117087	0.291592	0.045228	0	0.282574	0.035745	0.207338	0.044739	0.805404	0.001515	0.335788	0.692028
BnaA01g03230D	3.53354	3.3485	3.53228	2.76756	2.86474	3.75638	2.84324	4.00603	2.689	2.72945	2.61275	2.16568	2.14196	2.89318	3.07378	2.74778	2.82934	3.96376	2.69722	3.39353	3.14711	2.59893	3.69366	2.26806	2.36614	2.55574
BnaA01g03240D	0.22742	0.517558	0.088733	0.183169	0.019498	0.062258	0.140313	0.013696	0.14923	0.216041	0.087908	0.034775	0.058777	0.014023	0.046805	0.050581	0.052894	0.320329	0.2649	0.306862	0.063603	0.051091	0.082075	0.316362	0.0792	0.115294
BnaA01g03250D	0	0	0	0	0	0	0	0	0	0	0	0	0	0	0	0	0	0	0	0	0	0	0	0	0	0
BnaA01g03260D	0	0	0	0	0	0	0	0	0	0	0	0	0	0	0	0	0	0	0	0	0	0	0	0	0	0
BnaA01g03270D	7.84742	9.96346	7.69609	18.874	22.3075	26.1237	25.9453	22.4379	6.74301	9.27739	6.5852	108.801	102.947	91.6394	10.3412	8.66774	11.6128	36.2972	21.6054	30.2248	17.0829	14.6048	17.6957	10.9827	12.1225	12.7794
BnaA01g03280D	0.022798	0.021493	0.112244	0.018322	0.006914	1.08666	0.931966	0.262696	0.207069	0.97683	0	0.019755	0.507798	0.520165	0.143611	0.026951	0.021895	0.518766	0.753504	0.482403	0.571173	0.334023	0.171029	0.158139	0.335095	0.647808
BnaA01g03290D	0	0.061962	0.020522	0.162226	0.063009	0.051794	0.638763	0	0.039046	0	0	0.082596	0.039933	0	0	0	0	0	0	0	0.041445	0	0	0	0	0
BnaA01g03300D	31.0808	54.862	45.8845	388.497	314.069	86.5357	101.502	57.9001	9.21938	19.3635	18.3089	13.9944	7.07516	9.10684	80.5071	40.7879	147.827	57.2768	46.9102	41.1349	71.2779	72.3756	51.6837	51.3109	82.6049	81.8005
BnaA01g03310D	3.30944	3.73519	3.16201	7.03392	4.78901	5.34958	5.99098	4.1068	1.89647	0.355374	0.230928	0.215835	0.464706	1.56469	5.8895	6.11013	6.77491	6.72613	7.59258	5.94693	1.29373	2.31093	1.88034	7.18616	7.28883	8.18577
BnaA01g03320D	2.43948	2.41985	2.29737	2.23165	2.85803	4.27554	5.42453	4.1172	2.44854	2.8077	2.42158	6.51487	5.74143	6.29651	2.64353	2.67535	1.88032	4.63776	3.44034	3.6403	3.73324	3.41258	4.18757	2.71808	2.62008	2.48628
BnaA01g03330D	8.24841	12.2443	7.92774	6.84601	5.19076	7.15776	4.28883	5.35686	4.93681	6.56126	5.82324	2.27858	1.33213	2.78223	4.60108	5.99844	9.47999	5.76356	6.46781	5.91768	3.79891	3.03689	3.42167	10.8782	11.2003	11.5002
BnaA01g03340D	0	0	0	0	0	0	0	0	0	0	0	0	0	0	0	0	0	0	0	0	0	0	0	0	0	0
BnaA01g03350D	0.193802	0.241936	0.43663	0.544831	0.49288	4.73702	4.58456	4.03768	0.515449	0.174807	0.196122	1.18553	0.858902	1.91271	0.547667	0.473875	0.37829	1.44974	2.38768	1.92261	2.37997	2.25563	3.34405	1.47927	1.49587	1.32494
BnaA01g03360D	0.253787	0.047372	0.130492	0.781721	0.042029	0.74938	0.091306	0.285654	0.916646	0.698679	0.447507	0.70271	2.58231	1.06079	0.061504	0.079232	0.387759	0.083986	0.383854	0.039522	0	1.72644	0.042198	0.24405	0.479288	0.523541
BnaA01g03370D	1.10178	1.148	1.1726	4.71249	4.38091	77.8178	67.8938	62.5281	1.1558	2.50843	0.766571	8.59043	11.6246	14.9034	4.9723	4.99817	4.73256	15.8696	8.94326	16.3013	22.6832	19.0014	33.2001	6.23646	9.95208	7.92619
BnaA01g03380D	5.69888	7.30612	5.85785	6.62011	6.78087	3.65021	4.52846	0.615243	4.24986	5.94882	1.68719	5.0976	4.14827	3.53848	4.4895	4.63292	3.05515	6.16393	5.18449	3.45252	2.14165	5.65334	5.41406	6.03767	3.76628	4.21962
BnaA01g03390D	2.87195	3.26923	2.44136	0.668598	0.878487	0.804748	1.24019	1.12854	2.76289	3.62175	3.4229	0.90217	1.07476	1.0623	0.991473	0.732612	0.962396	1.86113	1.46313	1.75798	0.844626	1.01434	0.760454	2.37243	1.8834	1.88743
BnaA01g03400D	16.7383	19.1846	13.0035	10.4338	12.7007	22.4123	21.5497	21.3799	16.9833	18.3724	14.8747	24.9007	27.8505	25.7721	12.2515	13.8816	10.6725	10.0116	9.95471	9.04142	12.6308	11.021	12.1892	13.3897	12.059	13.5053
BnaA01g03410D	0.596552	0.701151	0.877926	0.687643	0.526059	0.623241	0.426931	3.14923	0.772954	0.847324	0.477658	0.334483	0.106579	0.28871	0.854846	0.813917	1.04724	0.471949	0.508232	0.462461	1.45348	0.877727	0.494935	1.20038	0.532315	0.918746
BnaA01g03420D	0.301052	0.531969	0.349196	0.177254	0.0598	0.403343	0.340488	0.405969	0.187957	0.157553	0.078325	0.860742	0.886661	0.947307	0.13276	0.412477	0.284991	0.503706	0.490663	0.363196	0.278241	0.307794	0.429158	0.178292	0.129986	0.371199
BnaA01g03430D	2.79989	2.59472	3.87534	3.85315	3.99485	5.93583	6.4237	8.18529	2.39759	1.86736	1.61868	2.99785	1.9154	2.48594	7.11736	12.8069	6.75833	0.988029	2.67865	1.70028	7.59204	5.06033	7.60435	1.86588	2.24288	2.18159
BnaA01g03440D	2.80806	3.05984	2.39251	2.12218	1.6423	2.29846	3.66673	4.27353	2.34156	1.35381	1.22421	1.1228	0.863562	1.65285	3.19037	2.81001	2.94214	2.74086	2.49293	2.71045	2.98583	2.34982	2.57232	2.69282	2.43362	3.28101
BnaA01g03450D	0	0	0	0	0	0	0	0	0	0	0	0	0	0.027362	0	0	0	0	0	0	0	0	0	0.106674	0	0
BnaA01g03460D	2.61726	4.29763	4.18178	2.51081	2.38616	0.868546	1.0745	1.78465	2.81749	2.99395	2.19074	0	0.195889	2.13532	1.68011	1.04419	2.80763	2.2497	1.9301	2.26532	1.03419	1.09231	2.34375	2.83019	4.55757	6.33647
BnaA01g03470D	0.359338	0.079392	0	43.1084	38.7642	133.153	83.1006	34.8882	0.307237	1.5002	0.102989	1.32054	0.859226	5.57634	0.422157	0.607383	0.412764	2.60231	0.599643	1.65215	2.00581	0.770069	1.20923	0.355438	0.771001	1.11726
BnaA01g03480D	8.91306	11.1524	8.44979	10.9815	12.8885	5.95614	7.39749	10.1878	4.35593	3.38216	4.90722	7.56115	6.86451	6.96743	12.8018	12.3207	13.5802	11.1335	10.1157	11.5767	11.8826	10.6904	9.80387	7.76393	8.80106	7.63963
BnaA01g03490D	0	0	0	0	0.144914	0	0.073154	0	0	0	0	0	0	0	0	0	0	0	0	0	0	0	0	0	0	0
BnaA01g03500D	0.296092	0.52122	0.178804	0.210083	0.728339	0.955918	0.865235	0.516836	0.128667	0.150268	0.461502	0.857589	0.93283	0.714825	0.149515	0.198825	0.259324	0.699529	0.756158	0.614991	0.358407	0.369861	0.684624	0.405463	0.406962	0.560265
BnaA01g03510D	3.24011	3.33632	3.08441	6.38696	6.57926	6.74222	7.05372	5.62424	8.79965	9.73734	14.8544	6.40912	5.96786	5.10545	4.32629	4.73482	4.12875	5.33947	5.04076	5.79578	6.41693	6.43866	8.56911	3.94557	3.73493	3.64259
BnaA01g03520D	0	0.09433	0	0.160399	0.264718	0.962582	2.09223	0.898084	0.04256	0.043979	0	0.32884	0.148716	0.099561	0	0.144909	0	0	0	0	0.238015	0.048668	0.266402	0.117232	0.188277	0.098288
BnaA01g03530D	0.445218	0.453107	0.672151	0.472749	0.331612	1.72284	1.03479	1.60191	0.629966	0.817055	0.387866	0.37057	0	0.662083	0.743295	0.924819	0.989544	0.289233	0.48109	0.365697	0.916729	0.832591	0.67396	0.57224	0.940934	1.1868
BnaA01g03540D	0.482696	0.545797	0.328156	0.332356	0.18422	0.72937	1.07538	0.801055	0.133397	0.564579	0.144564	0.911194	1.39127	1.03573	0.412849	0.180762	0.298942	0.24607	0.317033	0.163237	0.816009	0.897431	0.684655	0.585998	0.363465	0.555664
BnaA01g03550D	0.016879	0	0.004177	0.033642	0.015431	0.003504	0.040886	0.019148	0.001385	0	0.004544	0.003126	0	0	0.033791	0	0.00455	0	0	0.004032	0.011514	0	0	0	0.009913	0.031784
BnaA01g03560D	5.00378	5.0836	3.88713	2.76956	2.57278	5.40757	4.94228	4.6893	3.17961	3.7188	2.56231	2.19313	1.1674	2.68078	2.23948	2.64517	3.19067	5.89681	6.36118	4.63866	3.20488	3.63643	2.51709	5.85377	5.26495	4.52843
BnaA01g03570D	0.492684	0.403269	0.369201	0.915886	0.665201	1.02379	1.33464	0.561497	0.467921	0.349567	0.346349	0.502643	0.254841	0.242018	0.620007	0.472283	0.602688	0.815416	1.04857	0.663207	0.696687	0.432789	0.493058	1.14179	0.713521	0.743565
BnaA01g03580D	1.35837	1.40429	0.955503	2.31584	2.48244	0.897851	0.936852	1.48482	0.930996	1.0228	1.60381	12.8551	14.8292	7.69363	2.95311	2.91541	3.2558	1.44988	1.71671	1.74827	3.01108	1.86353	2.09723	2.20845	3.03588	2.09654
BnaA01g03590D	0.253128	0.188444	0.320445	0.177303	0.403657	0.154096	0.582105	0.066048	0.08273	0	0.220902	0	0	0	0.183792	0.250052	0.13478	0.120938	0.202977	0.004456	0.44664	0.049651	0	0.623069	0.033703	0.125932
BnaA01g03600D	10.7732	12.3439	11.0142	7.26052	7.71754	11.0131	7.44068	11.3335	9.34358	12.4755	6.85267	21.3009	23.9438	25.2595	5.90234	6.98313	6.74977	12.6876	15.4984	14.6578	6.55658	8.37123	5.69459	13.5783	14.4571	15.0518
BnaA01g03610D	0	0	0	0	0	0	0	0	0	0	0	0	0	0	0	0	0	0	0	0	0	0	0	0	0	0
BnaA01g03620D	0	0	0	0	0	0.037678	0	0	0	0	0	0	0	0	0	0	0	0	0	0	0	0	0	0.033611	0.025454	0.068644
BnaA01g03630D	1.35493	0.252024	0.490757	0.294944	0.370239	0.415945	0.259289	0.286703	0.676691	0.628306	0.454124	0.527363	0.253436	0.319296	0.28694	0.38922	0.225795	0.444501	0.273404	0.494728	0.407585	0.34937	0.394016	1.39858	0.358485	0.499486
BnaA01g03640D	0	0.110396	0	0	0	0	0.109436	0.182966	0	0	0.084194	0	0	0	0	0	0	0.011956	0.012282	0.074166	0	0.004772	0	0	0	0.114204
BnaA01g03650D	3.43388	3.28733	2.68185	3.04329	3.94108	6.90002	4.37758	5.11515	4.05945	4.28265	3.39841	8.65743	5.74286	7.17235	3.03003	3.91357	3.93232	7.82372	5.92078	7.38141	5.94306	6.03874	7.28036	4.39325	3.88995	3.67884
BnaA01g03660D	0.106816	0.085887	0.123625	0.057286	0.039877	0.013419	0.039992	0.029556	0.038514	0.210543	0.148656	0.860124	0.776995	0.739851	0.066187	0.127489	0.029674	0.245556	0.105912	0.146255	0	0.06515	0.029532	0.029254	0.048949	0.020076
BnaA01g03670D	0.446508	0.511499	0.374863	0.813725	0.578753	1.17759	1.50666	1.25254	0.259012	0.33893	0.228568	2.42443	2.04276	1.58367	0.785654	0.820048	0.929689	0.904403	1.00362	0.488815	0.877805	0.494709	1.36895	0.563238	0.531296	0.282357
BnaA01g03680D	0.029618	0	0	0.663714	0.678491	1.16139	2.11505	11.2521	0.030022	0	0	0.87849	0.797356	0.590194	0.618931	0.454671	0.427118	0.750094	0.5991	0.677073	0.863033	0.568266	0.966568	0.747078	0.376427	0.624695
BnaA01g03690D	0	0	0	0	0.07825	0	0	0	0	0	0	0	0	0	0	0	0	0	0	0	0	0	0	0.077561	0	0
BnaA01g03700D	0	0	0	0	0	0	0	0	0	0	0	0	0	0	0	0	0	0	0	0	0	0	0	0	0	0
BnaA01g03710D	0	0	0	0	0	0	0	0	0	0	0	0	0	0	0	0	0	0	0	0	0	0	0	0	0	0
BnaA01g03720D	0	0	0	0	0	0	0	0	0.02105	0	0	0	0	0	0	0	0	0	0	0	0	0	0	0	0	0
BnaA01g03730D	0.270116	0.338659	0.241733	0.143126	0.075907	0.448441	0.221783	0.397826	0.147038	0	0.07556	0.442943	0.659581	0.276927	0.164613	0.372742	0.20084	0.519864	0.292849	0.324698	0.368405	0.250709	0.213871	0.321744	0.246317	0.17817
BnaA01g03740D	0	0	0	0	0	0.056137	0	0	0	0	0	0	0	0	0	0	0	0	0	0	0	0	0	0	0	0
BnaA01g03750D	0	0	0	0	0	0	0	0	0	0	0	0	0	0	0	0	0.052005	0	0	0	0	0	0	0	0	0
BnaA01g03760D	0	0	0	0	0	0	0	0	0.095618	0.035121	0.04398	0	0	0	0	0	0	0	0	0	0.103841	0	0	0	0	0
BnaA01g03770D	0	0.067314	0	0	0	0	0.070827	0	0	0	0	0.180952	0.198017	0.166052	0	0	0	0	0	0	0	0	0	0	0	0
BnaA01g03780D	0.124651	0.417211	0.15455	0.229746	0	0.128261	0.143176	0.335314	0.101681	0.06349	0.147844	0.256121	0.86104	0.438006	0.301658	0.178652	0.174865	0.128774	0.328275	0.482839	0.115721	0.192004	0.249099	0.181473	0.394813	0.612835
BnaA01g03790D	7.73114	7.78262	7.59371	8.58235	8.23176	22.1081	16.3363	19.2253	6.46413	5.92728	5.78023	9.72055	10.038	10.0796	6.25174	6.52339	7.14618	11.9999	10.0351	10.7762	10.4007	8.6251	13.3101	8.65572	6.93294	8.49778
BnaA01g03800D	0	0	0	0	0	0	0	0	0	0	0	0	0	0	0	0	0	0	0	0	0	0	0	0	0	0
BnaA01g03810D	0.902836	0.855198	1.80456	0.589755	0.783956	0.941775	0.51567	1.85066	1.16795	5.22614	4.76013	8.85471	1.44289	1.12451	1.63593	1.11548	1.48733	7.08593	1.41369	1.59631	1.48735	1.05987	0.648801	1.08712	1.77748	1.7692
BnaA01g03820D	0.577269	0.351133	0.30815	0.807515	1.32736	0	0.278318	0.158585	1.84589	4.18232	12.4878	4.31742	0.980825	0.178773	0.570489	0.632549	0.405635	0.045644	0.244797	0.089941	0.307003	0.344409	0.856131	0.090484	0.205573	0.134334
BnaA01g03830D	2.773	2.35152	0.570802	2.97511	2.70785	1.96202	0.642381	1.50655	2.8254	1.13134	0.312709	9.90189	10.3154	11.534	1.00775	1.99267	2.33073	22.4798	13.1178	16.4685	0.670015	1.16309	1.79989	3.25593	1.42819	2.9664
BnaA01g03840D	0	0	0.010043	0	0	0	0	0	0	0	0	0	0	0	0	0	0	0	0	0	0	0	0	0	0	0
BnaA01g03850D	0	0	0	0	0	0	0	0	0	0	0	0	0	0	0	0.046565	0	0	0	0	0	0	0	0	0	0
BnaA01g03860D	450.572	440.016	389.224	346.502	311.633	191.988	236	384.949	464.484	512.139	384.004	393.152	341.673	288.979	483.431	297.574	388.288	729.983	580.478	693.298	380.288	348.771	261.11	517.285	530.368	513.967
BnaA01g03870D	0.188311	0.085717	0.112026	0.62772	0.434258	0.182543	0.442961	0.147233	0.274653	0.16616	0.205159	0	0.13079	0.062828	0.033827	0	0.13428	0.081599	0.092676	0.139706	0.047112	0.14347	0	0.010268	0.200525	0.021465
BnaA01g03880D	2.6408	3.15651	3.01228	7.04547	6.90854	18.5461	19.0828	13.9131	1.86274	1.70226	3.93332	4.61699	4.74785	7.84727	7.97752	6.17663	7.65711	6.20495	4.43891	6.03966	10.4781	11.0497	14.5401	5.95029	5.81897	7.67448
BnaA01g03890D	0	0	0	0	0	0	0.030203	0	0	0	0	0.033453	0.064223	0	0	0	0	0.05931	0	0	0	0	0	0	0	0.031887
BnaA01g03900D	0.419157	0	0	0	0.441689	0.500674	0.215198	0.602031	0.207603	0.351942	0.336062	0.912764	1.61451	2.70948	0	0	0.718862	0.632066	0	1.4909	0.217341	0.757238	1.03938	0.338094	0	0
BnaA01g03910D	1.71849	1.42375	1.41268	0.541992	0.946977	0.225394	0	0.26085	2.08342	1.36258	0.930235	3.82057	5.8681	6.57557	1.01064	0.572511	0.513007	5.18784	2.72876	5.75966	0.826126	1.07349	2.16334	0.077036	0	0.413258
BnaA01g03920D	1.36086	0.531672	0.394261	0	0.365219	0	0	0	1.02152	0.878456	0.15294	1.14077	0	0.518692	0.749668	0	0	0.652663	0.911716	1.20013	0.600282	0.933861	1.02577	0	0	0
BnaA01g03930D	0	0	0	0	0	0	0	0	0	0	0	0	0.863387	0.592338	0	0	0	0	0	0	0	0	0	0	0	0
BnaA01g03940D	0	0.032504	0.03165	0	0	0	0	0	0.073502	0.062272	0	0.551013	0.166998	0.681075	0	0	0	0.403868	0	0.196076	0	0	0	0	0	0
BnaA01g03950D	0	0	0	0	0	0	0	0	0	0	0	0	0	0	0	0	0	0.036943	0	0	0	0	0	0	0	0
BnaA01g03960D	0.07382	0.007604	0	0	0.02723	0	0.009662	0	0.038384	0.1482	0	0.301313	0.446376	0.321347	0.108613	0.04873	0	0.202667	0.13995	0.085614	0.060257	0.065194	0	0	0.040033	0
BnaA01g03970D	0	0	0	0	0	0	0	0	0	0	0	0	0	0	0	0	0	0	0	0	0	0	0	0	0	0
BnaA01g03980D	0	0	0	0	0	0	0	0	0	0	0	0	0	0	0	0	0	0	0	0	0	0	0	0	0	0
BnaA01g03990D	0	0	0	0	0	0	0	0	0	0	0	0	0	0	0	0	0	0	0	0	0	0	0	0	0	0
BnaA01g04000D	18.9641	16.7429	25.5257	49.1882	46.8868	31.3262	32.5163	36.9108	14.5803	13.5299	13.2507	28.257	10.0257	30.4784	91.5785	47.8473	64.8455	62.953	38.9368	76.8022	69.9208	92.0354	149.13	21.0475	31.5056	33.5256
BnaA01g04010D	0.020084	0.28979	0.063512	0.198918	0.239579	0.232152	0.141632	0.100522	0.063057	0.113528	0.083708	0.076565	0.071837	0.022381	0.095534	0.091476	0.232774	0.131607	0.086454	0.151582	0.062655	0.04024	0.396484	0.142356	0.113635	0.08434
BnaA01g04020D	0.409283	0.697713	0.353435	7.94034	11.0412	6.17623	6.49954	6.37232	2.72123	3.88891	1.49246	4.4598	3.25313	5.97467	0.420354	0.313503	0.692118	3.23816	1.75917	3.1509	2.01634	2.14723	1.61585	1.72604	1.81685	2.24117
BnaA01g04030D	2.75265	2.95185	2.87986	1.37509	1.71122	2.07028	1.91431	3.73856	2.24658	2.81651	1.85095	6.22801	5.73093	6.99645	1.69344	2.35306	1.23808	2.4196	4.48036	4.24258	1.12929	2.23255	1.4466	3.13941	2.4244	3.15139
BnaA01g04040D	0.748237	0.732202	0.581884	0.649548	0.223088	1.07175	0.617432	0.383904	0.62407	0.944955	1.4534	0.590658	0.868475	0.444548	0.352336	0.415313	0.468504	0.791047	0.486671	0.602501	0.413318	0.627512	0.534346	0.920187	0.686477	0.430614
BnaA01g04050D	0	0	0	0.089914	0.188398	0.225274	0.326382	0.51531	0	0	0	0.163594	0	0	0.148278	0.246536	0.031155	0	0	0	0.121115	0.258993	0	0.306727	0.242744	0.150495
BnaA01g04060D	0	0	0	0	0.105075	0	0	0	0	0	0	0	0	0	0	0	0	0	0.154352	0.005086	0	0	0.152207	0	0	0
BnaA01g04070D	2.11986	2.82941	2.31429	1.86826	1.72381	0.196757	0.425667	0.640458	3.25865	3.61621	1.27029	1.28009	1.77507	2.80509	0.343426	0.350468	0.63706	1.995	1.66358	1.50294	0.502364	0.655735	1.2142	4.00856	3.42521	1.69858
BnaA01g04080D	0.188253	0.475638	0.703066	0.707145	0.084026	13.8997	15.9992	12.7546	0.394004	0.193552	0.575714	1.07154	0.092174	2.14641	0.375479	0.194178	0.201703	0.23104	1.10286	1.59307	0.639818	0.876713	3.1673	0.198847	0.322171	1.10943
BnaA01g04090D	0	0	0	0	0	0	0	0	0	0	0	0	0	0	0	0	0	0	0	0	0	0	0	0	0	0
BnaA01g04100D	0	0	0	0	0	0	0	0	0	0	0	0	0	0	0	0	0	0	0	0	0	0	0	0	0	0
BnaA01g04110D	0.27109	0.163723	0.066218	0.058166	0	0.168988	0.198687	0.085163	0.128953	0.169733	0.086013	0.386119	0.280201	0.306841	0.049492	0.24076	0.154733	0.168603	0.229329	0.294483	0.084248	0	0.068441	0.050509	0.064861	0.052342
BnaA01g04120D	0.124042	0.057456	0.139817	0.219925	0.267999	0.256087	0.223103	0.354113	0	0.108711	0	0	0.03718	0.082003	0.198739	0.313923	0.461493	0.058968	0.211607	0.20394	0.275327	0.237148	0.235625	0.173983	0	0.171476
BnaA01g04130D	0	2.07763	2.24856	0	0	0	0.005131	0	0	2.24922	0	0	2.43303	0	0	0	2.12139	0	0	0	0.03807	0	0	0	0	0
BnaA01g04140D	0	0	0	0	0	0	0	0	0	0	0	0	0	0	0	0	0	0.032546	0	0	0	0	0	0	0	0.034834
BnaA01g04150D	0	0	0	0	0	0	0	0	0	0	0	0	0	0	0	0	0	0	0	0	0	0	0	0	0	0
BnaA01g04160D	0.439979	0.308525	0.360249	0.326354	0.280895	0.292669	0.080719	0.298271	0.23425	0.481605	0.210607	0	0.039081	0.204542	0.210217	0.348596	0.556741	0.119272	1.0853	0.080398	0.441215	0.498127	0.374064	1.44996	1.01185	1.22373
BnaA01g04170D	0.07001	0.325704	0.050474	0.000785	0	0.147851	0.156413	0.154108	0	0.128772	0	0.19567	0.310035	0.206798	0.000773	0.064702	0.067665	0.12992	0.279518	0.283866	0.154283	0	0.028568	0.075424	0.069498	0.252344
BnaA01g04180D	0	0	0	0	0	0	0	0	0	0	0.03638	0	0	0.052329	0	0	0	0	0	0	0	0	0	0	0	0
BnaA01g04190D	0	0	0	0	0	0	0	0	0	0	0	0	0	0	0	0	0	0	0	0	0	0	0	0	0	0
BnaA01g04200D	4.05659	4.2448	4.43613	7.07074	6.47353	14.7186	19.9692	14.3829	5.07299	7.27407	7.14528	11.0741	9.12788	10.0407	4.87724	4.0066	4.23916	5.88342	5.74456	6.83045	10.5423	13.9937	12.3543	8.35354	10.4994	9.21658
BnaA01g04210D	0.676441	0.275317	0.461245	0	0.052276	1.01314	0.885874	0.990686	0.185867	0.111524	0	0.084301	0.386291	0.29462	0.109423	0.703658	0.228451	0.184702	0.207167	0	0.263843	0.114032	0.392847	0.801981	0.283105	0.285241
BnaA01g04220D	0.031551	0.070881	0.207765	0.015194	0	0.178605	0.278932	0.096045	0.020849	0.047654	0.074511	0.041294	0.172823	0.042719	0.072589	0.144366	0.063448	0.065531	0.07929	0.128519	0.205579	0.189589	0.127682	0.21992	0	0.075804
BnaA01g04230D	0.199848	0.350952	0.111747	0.087975	0.025244	0	0	0.150704	0.284904	0.267198	0.099845	0.521174	0.922552	0.950343	0.087165	0.083551	0.045267	0.460871	0.405672	0.377367	0.082674	0.142067	0.138488	0.316742	0.275197	0.29817
BnaA01g04240D	0	0	0	0	0	0	0	0	0	0	0	0	0	0	0	0	0	0	0	0	0	0	0	0	0	0
BnaA01g04250D	0	0	0	0	0	0	0	0	0	0	0	0	0	0	0	0	0	0	0	0	0	0	0	0	0	0
BnaA01g04260D	0	0.200285	0	0	0	0	0	0	0	0.11097	0	0	0	0.047289	0	0	0	0	0	0	0	0	0	0	0	0
BnaA01g04270D	0.749382	0.49822	0.560393	0.191501	0.05251	0	0	0	0.643311	0.213583	0.354211	0.088381	0.092386	0.051238	0	0.443298	0	0.197439	0.041905	0.089397	0	0.06667	0	0.21797	0.154525	0.158689
BnaA01g04280D	1.18035	0.687591	1.31666	0.253209	0.349504	0	0	0	0.338089	0.6799	0.59118	0.365562	0.47662	0.116501	0.197949	0.565105	0.708331	0	0	0	0.269601	0.229505	0	0.279026	0.586709	0.480098
BnaA01g04290D	0.063479	0.232005	0.077839	0.084603	0.018336	0.140371	0.204993	0.159793	0.133028	0.195303	0.095038	0.179616	0.10713	0.082642	0.203041	0.084608	0.070536	0.175229	0.204822	0.155369	0.341628	0.274381	0.22236	0.106459	0.132338	0.103917
BnaA01g04300D	32.539	45.2134	31.5989	4.59213	4.72831	0.730837	1.19161	1.44439	27.9097	22.8054	20.994	7.24403	9.07656	7.76707	3.76033	13.403	7.45152	7.97741	13.2938	9.9427	3.83626	2.97645	1.80814	2.22919	3.12225	3.36535
BnaA01g04310D	3.17272	3.15671	2.17436	3.02831	2.69723	5.45794	6.33235	5.60022	2.41208	2.57249	2.98909	3.8018	3.58022	4.3253	1.65363	2.57647	2.22901	3.50557	4.42503	4.034	3.4783	3.26593	5.2949	2.88364	3.82815	3.15128
BnaA01g04320D	0	0	0	0	0	0	0.023376	0	0	0	0	0	0	0	0	0	0	0	0	0	0	0	0	0	0	0
BnaA01g04330D	0	0.032311	0	0	0	0	0.013481	0	0	0	0	0.039423	0.013645	0	0.038329	0	0	0.042602	0	0.124436	0.011175	0.03321	0.06911	0.012688	0	0
BnaA01g04340D	2.37206	1.70137	0.607831	0.544068	0.927202	2.44242	1.31733	1.77445	1.34814	0.217904	2.68346	4.3775	3.35766	2.03427	1.27668	1.91553	2.1367	2.67999	2.19071	3.56594	3.36815	1.06969	0	0.861478	2.43624	2.46722
BnaA01g04350D	0	0	0	0	0	0	0	0	0	0	0	0	0	0	0	0	0	0	0	0	0	0	0	0	0	0
BnaA01g04360D	8.59944	7.37202	7.60785	6.18179	7.80333	9.78647	10.0169	11.2313	9.82283	10.0922	9.03168	19.7433	18.2288	19.7825	7.16614	7.83729	6.91073	16.9463	15.3996	15.2981	9.45429	9.1161	10.8148	10.426	8.55203	7.80856
BnaA01g04370D	0	0	0	0	0	0	0.298895	0	0	0	0	0	0	0	0	0	0	0	0	0	0.031229	0	0	0	0	0
BnaA01g04380D	0	0	0	0	0	0	0	0	0	0	0	0	0	0	0	0	0	0	0	0	0	0	0	0	0	0
BnaA01g04390D	0	0	0	0.057979	0	0.101727	0.128599	0.079733	0	0	0.101441	0	0.175436	0.061891	0	2.14227	0.926999	0	0	0.373266	0	0	0	0	0.170272	0
BnaA01g04400D	0	0	0	0	0	0	0	0	0	0	0	0	0	0	0	0	0	0	0	0	0	0	0	0	0	0
BnaA01g04410D	0.089977	0	0.528434	0.398773	0	0.502389	0.628452	0.272393	0.22396	0	0	0.179845	0.751648	0.13822	0.262718	0.162976	0.457232	0.455371	0.089459	0	0.479519	0.320177	0.360877	0.1658	0.090448	0.185852
BnaA01g04420D	7.2767	7.18191	6.35856	9.22557	6.49987	12.8479	15.9067	13.8957	9.31406	12.3945	9.80492	18.0287	22.1193	16.4581	6.23077	5.40098	5.05224	6.75169	8.34315	7.62162	8.7078	10.5989	11.3328	11.112	8.60147	11.0704
BnaA01g04430D	1.1971	1.73721	1.01723	0.318632	0.766189	2.94766	2.01732	1.53524	0.507109	0.784141	0.121736	2.88163	3.53243	4.17004	0.786123	0.835309	0.987419	1.55231	1.82015	2.0788	0.655454	1.18711	0.65952	0.718739	0.927341	1.20143
BnaA01g04440D	5.36496	4.70784	5.63434	5.43485	4.31866	8.3865	12.3646	9.57653	10.3281	8.21316	12.8668	5.54811	6.06935	6.06591	7.97753	9.04304	4.32591	3.19367	2.6784	3.84463	9.73861	7.11938	10.3239	3.88234	4.49124	5.07263
BnaA01g04450D	0	0	0	0	0	0.296848	0	0	0	0	0	0	0	0	0.261095	0	0	0	0	0	0	0	0	0	0	0
BnaA01g04460D	2.20149	2.12579	2.37324	0.61504	0.808567	1.4719	0.951073	1.70139	0.747421	0.718566	0.740792	0.260119	0.2914	0.201428	1.1809	0.971763	1.61346	0.969183	2.15604	1.06978	0.815143	1.03543	0.731862	5.31002	3.85392	3.032
BnaA01g04470D	0.651601	0.764188	0.801973	1.07238	0.530354	1.89655	1.51462	1.96617	0.568702	0.633414	0.988028	1.60232	1.39739	1.85504	1.10056	0.726907	0.868368	1.75596	1.27537	1.03153	1.87606	1.29584	1.278	1.54632	0.834135	1.12952
BnaA01g04480D	3.04761	3.11181	2.94706	2.37128	2.39322	7.36591	6.86552	6.40449	3.47096	3.77086	2.87515	4.47906	4.87869	4.95283	2.65651	2.8456	2.90009	3.93662	4.17817	3.85786	5.06316	3.87887	5.06136	4.23297	3.60931	4.06016
BnaA01g04490D	0	0	0	0	0	0	0	0	0.045683	0	0	0	0	0	0	0	0	0	0	0	0	0	0	0	0	0
BnaA01g04500D	0	0	0	0	0	0	0	0	0	0	0	0	0	0	0	0	0	0	0	0	0	0	0	0	0	0
BnaA01g04510D	16.0787	18.4142	16.9841	9.57519	12.8215	16.492	16.1973	13.883	14.7455	12.8547	10.7027	20.385	19.1056	20.3084	15.2577	17.8397	14.234	19.8264	18.3617	16.9743	14.5499	12.31	13.1204	15.9338	13.8058	14.3835
BnaA01g04520D	0	0.056264	0.054602	0.011183	0.026308	0.040871	0.013813	0.028756	0	0.021384	0	0.292187	0.195287	0.331051	0.023607	0.046812	0	0.077505	0.04231	0.029067	0.014148	0.0179	0.014367	0.014184	0.041089	0.004156
BnaA01g04530D	0	0	0.021481	0.062153	0	0	0.034257	0	0.021826	0.039437	0	0.283018	0.225737	0.328641	0	0	0	0	0	0	0	0	0.033304	0	0	0.02264
BnaA01g04540D	24.9438	27.2302	20.4221	18.9852	18.6763	26.9901	31.4407	16.5334	23.9458	27.1116	20.8151	38.1087	47.2785	59.776	12.0727	16.0927	13.1029	32.8238	24.3766	27.1872	24.7307	21.4646	22.087	21.7295	22.5422	15.8852
BnaA01g04550D	0.595399	1.08411	0.366003	0.227591	0.205121	0.486514	0.218332	0.738129	0.039822	0.040064	0.183357	0.099865	0.13106	0.145959	0.117044	0.429023	0.359689	0.080969	0.237009	0.122803	0.09973	0.09606	0	1.13482	0.571756	0.553659
BnaA01g04560D	0.447497	0.388772	0.499969	0.813956	0.55052	1.20031	1.75358	0.993764	0.200945	0.095006	0.159563	0.83106	0.852188	0.419462	0.338794	0.202362	0.084582	0.312645	0.631902	0.567784	0.595951	0.648783	0.280137	0.728417	0.640522	0.882958
BnaA01g04570D	0.488854	0.287896	0.309392	0.616253	0.630949	1.15582	0.89002	1.05773	0.290997	0.057389	0.172168	0.693732	0.84694	0.567215	0.814846	0.910221	0.780951	0.746045	0.679468	0.449497	0.536048	0.437626	0.644873	0.94416	0.663899	1.02358
BnaA01g04580D	0.327199	0.250916	0.113358	0.023269	0.04843	0.023967	0.04857	0.09564	0.339964	0.369436	0.227785	1.34108	1.59521	1.5579	0.087914	0.209995	0.126457	0.444789	0.293329	0.289538	0.056355	0.059343	0.047822	0.214436	0.071354	0.036248
BnaA01g04590D	2.17329	2.33974	1.82928	0.774675	0.74829	1.34338	1.74517	2.32026	1.9725	1.96129	1.57424	5.69615	8.24985	4.70736	1.72231	1.46703	1.29376	2.78281	3.27121	2.63143	1.63407	1.94507	1.33956	2.85238	2.79587	2.65131
BnaA01g04600D	0	0	0	0	0	0	0	0	0	0	2.70565	0	0	0	0	0	0	0.004417	0.004734	0	0.004926	0.005196	0	0.005209	0	0
BnaA01g04610D	2.45393	1.91007	1.95596	0.721698	1.05892	1.11706	0.968546	1.30029	4.67115	3.52705	2.91133	10.4088	15.9077	10.0083	0.866114	1.02297	0.933659	1.24868	1.80416	1.44682	1.11961	0.706483	0.978304	1.37609	1.61918	2.6597
BnaA01g04620D	17.0529	18.3446	14.7653	10.1772	14.1871	16.0099	15.3536	19.5477	17.0807	14.9259	14.3218	43.7931	39.5355	37.5984	10.8645	13.3021	13.148	24.2305	24.9501	24.2408	13.7829	15.8419	14.4818	16.0662	15.6218	17.2232
BnaA01g04630D	0.049921	0	0	0	0	0	0.143178	0	0	0	0	0	0	0	0	0.139414	0	0.176186	0	0	0.068627	0.244198	0.047682	0.028945	0	0
BnaA01g04640D	1.32499	0.83581	1.27106	0.53064	0.608818	1.45444	1.39874	1.52358	1.92314	1.19194	1.64507	2.03321	1.68529	1.82963	2.40957	2.03785	2.195	1.81404	1.68343	1.57419	1.32902	1.43772	1.53661	1.05492	1.43929	0.841831
BnaA01g04650D	1.48763	1.227	2.85852	0.557447	0.594938	2.41171	2.74483	8.21989	6.46588	2.88115	4.03049	3.36792	3.70748	3.51551	19.4419	28.4858	7.2564	0.718224	1.3181	1.61399	9.47101	10.4009	18.9294	0.394987	0.843583	0.963424
BnaA01g04660D	3.84701	3.1736	3.82843	1.66641	1.68557	2.04289	1.45141	2.37725	2.63019	3.86288	3.26332	2.40494	2.17601	3.38102	3.35202	3.50643	3.16622	4.85284	5.1059	5.26351	3.22344	4.03573	2.90406	4.47162	3.5595	4.55434
BnaA01g04670D	0	0	0	0	0	0	0	0	0	0	0	0	0	0	0	0	0	0	0	0	0	0	0	0	0	0
BnaA01g04680D	0.271749	0.187921	0.264818	0	0	0.144432	0.052783	0.206497	0.069891	0.278459	0.1404	0	0	0	0.8888	0.667622	0.195291	0.111659	0	0.17721	0.175204	0.128807	0.18155	0.720043	0.597652	0.774254
BnaA01g04690D	0	0	0.061565	0	0	0	0	0	0	0	0	0	0	0	0	0	0	0	0.216548	0	0	0	0	0	0	0
BnaA01g04700D	0.021349	6.10435	0.009835	0	0	5.61951	4.19727	4.93976	7.88863	8.22585	8.16949	0.026698	2.12703	0	6.51945	7.64219	4.24323	7.69782	0	10.3554	4.4869	0.013413	6.15207	6.45552	0.012569	0
BnaA01g04710D	0.486023	0.062233	0.216423	0.576668	0.321939	0.189191	0.0351	0	0	0.115412	0	0.063275	1.69158	0.559025	0	0.640957	0	0.194382	0	0.12909	0.186503	4.43545	0.208776	0.383442	0.139205	1.37205
BnaA01g04720D	1.00104	1.31851	0.956526	0.77341	0.750073	3.10172	2.68407	4.62053	0.618452	0.953322	1.22379	1.25662	0.967459	1.04404	1.16706	1.22994	1.00858	1.6678	1.73809	2.13516	2.18156	2.3085	2.29784	1.26776	1.23516	1.4514
BnaA01g04730D	3.25733	3.18021	3.14771	4.93029	4.7562	10.9498	18.66	6.23795	3.00432	3.42256	2.91872	5.61044	4.24704	7.93688	2.23491	1.70355	2.90498	4.18412	3.61016	4.6935	6.08514	4.45641	5.61071	4.18031	3.66286	4.1962
BnaA01g04740D	544.318	500.263	625.79	618.013	592.059	158.295	262.8	286.88	431.068	303.535	292.084	185.142	167.772	216.902	644.517	504.814	676.891	341.432	382.668	294.82	433.777	451.403	408.945	398.417	409.069	462.204
BnaA01g04750D	34.2354	35.9917	31.8956	58.6142	52.1802	2.89203	9.26164	3.18924	56.7653	69.5187	51.3115	26.1844	22.5519	20.8963	11.6648	3.82558	21.3916	54.7442	46.875	42.8878	20.5515	39.7773	11.5215	40.2901	46.3133	42.2567
BnaA01g04760D	3.38467	3.99342	2.90915	3.9582	3.04646	5.56497	5.72371	6.00172	5.40644	4.55275	4.94226	3.64495	2.65876	2.03163	2.79785	2.55959	2.58663	4.50768	5.66609	5.01095	5.29228	5.77211	6.07156	5.33076	5.29246	3.75843
BnaA01g04770D	0	0	0	0	0	0	0	0	0	0	0	0	0	0	0	0	0	0	0	0	0	0	0	0	0	0
BnaA01g04780D	2.77589	2.45285	2.57758	5.8934	5.61484	12.4644	9.21147	12.2803	4.26366	3.35312	3.05358	17.6814	17.6527	22.062	4.893	6.24131	5.77511	10.5706	9.99958	12.7246	14.7371	13.5784	17.4959	6.1761	7.50661	6.32341
BnaA01g04790D	0.494412	0.476335	0.797059	0.466443	0.732589	1.23379	1.10513	1.17214	1.03636	0.490192	0.6204	1.41514	1.82105	1.09272	0.693539	0.473119	0.59547	0.938232	0.691525	0.900105	0.848713	0.720347	1.14061	1.63299	1.15881	0.916592
BnaA01g04800D	3.89863	4.54084	3.29272	1.93212	1.66838	2.30487	2.34405	1.87433	2.08711	3.08996	2.93522	2.35055	2.09904	1.63702	2.51314	2.07972	2.84199	2.39229	3.1591	2.99644	1.79975	1.74518	1.68277	3.42802	3.20625	2.98394
BnaA01g04810D	1.12203	0.368759	0.795393	0.40415	0.906051	0.089203	0.096156	0.56345	0.186137	0.553669	0.572006	0.187466	0	0.385957	0.445767	0.557672	0.614225	0.758827	1.15864	0.287323	0.95532	0.279994	0.64253	0.281351	0.093966	0.987287
BnaA01g04820D	0	0	0	0	0	0	0	0	0	0	0	0	0	0	0	0	0	0	0	0	0	0	0	0	0	0.103455
BnaA01g04830D	0	0	0	0	0	0	0	0	0	0	0	0	0	0	0	0	0	0	0	0	0	0	0	0	0	0
BnaA01g04840D	0	0	0	0	0	0	0	0	0	0	0	0	0	0	0	0	0	0	0	0	0	0	0	0	0	0
BnaA01g04850D	1.08941	1.84975	1.19986	6.51327	4.46695	3.41067	7.86916	4.19761	1.43695	1.22062	2.01517	2.74368	2.21745	1.56641	1.84633	3.60122	3.04257	0.874379	1.61653	1.15033	3.90935	2.94681	1.28117	1.16583	1.20797	1.44522
BnaA01g04860D	0.740285	0.687884	0.599834	0.780865	0.735116	2.07188	3.91552	2.17794	0.832581	1.52105	1.01538	7.9835	9.29995	7.29634	0.443964	1.18147	0.496507	1.29804	2.61502	1.92543	0.770459	1.14713	0.786573	1.10435	1.07455	0.795613
BnaA01g04870D	0.058159	0.646725	0.696531	2.55407	2.15002	3.07776	2.38161	4.52566	1.26194	2.46304	1.43107	0.74189	1.08045	0.111989	1.27852	0.986542	0.650783	1.51247	3.45788	1.67839	2.46135	3.37112	3.79811	2.03755	2.85351	0.920911
BnaA01g04880D	2.39514	2.08507	2.11426	8.02973	7.82562	6.55749	8.53267	4.89931	3.68409	5.21893	5.40965	10.7009	7.74666	7.61662	3.64285	5.43301	4.92153	3.9558	3.83479	4.15109	6.37324	8.93659	9.13654	2.16326	2.28166	2.63241
BnaA01g04890D	30.2054	30.2684	21.8021	22.7659	24.1198	17.1256	21.3586	17.0885	53.1967	45.4657	63.6955	53.4016	55.6369	36.7641	30.6732	31.0255	34.2764	32.0237	30.4121	33.0725	26.2371	34.3738	32.1026	18.7204	21.6047	22.9302
BnaA01g04900D	0.04107	0.120975	0.119533	0	0	0	0	0	0.101479	0	0	0	0	0	0	0.064416	0	0	0.032261	0	0	0.041657	0	0	0	0
BnaA01g04910D	8.87937	10.9546	8.30213	7.84156	4.46666	9.04672	7.09055	11.3753	4.67201	7.15092	3.41201	5.08071	4.32467	5.52478	8.34536	9.13484	10.0375	9.09434	8.64509	8.91686	5.73327	7.16683	6.94387	10.1062	4.25896	7.95185
BnaA01g04920D	7.71821	8.57174	3.57119	4.80456	0.072522	15.1448	13.8254	13.5653	12.6959	12.1843	7.84789	19.4414	28.1459	33.9799	6.70815	6.6221	4.64789	15.528	11.3805	19.7041	6.03934	8.67584	6.12959	18.0384	17.3212	16.8206
BnaA01g04930D	0.071256	0.199272	0.204538	0.236854	0.236228	0.707129	0.369378	0.370593	0.142844	0.061248	0.073242	0.424072	0.070457	0.65089	0.208055	0.269339	0.139656	0.516742	0.28434	0.217311	0.242556	0.142598	0.681989	0.288081	0.350423	0.638625
BnaA01g04940D	0	0	0	0	0	0	0	0	0	0	0	0	0	0	0	0.016222	0	0	0	0	0	0	0	0	0	0
BnaA01g04950D	0.022355	0	0	0.076528	0.017503	0	0	0	0	0	0	0	0.01606	0.020278	0	0.01129	0.013953	0	0	0.022904	0.022296	0.02275	0	0	0	0
BnaA01g04960D	0	0	0	0	0	0	0	0	0	0	0	0	0	0	0	0	0	0	0	0	0	0	0	0	0	0
BnaA01g04970D	0.918113	0.980244	0.752063	0.068296	0	0	0	0	0.022997	0.262982	0.035374	0.018869	0	0.031308	0.042658	0.087952	0.195833	0.023379	0.12835	0	0.023037	0.018858	0.04632	0.788653	0.254976	0.377152
BnaA01g04980D	0.153575	0.279095	0.246205	0.067412	0.174607	0.197076	0.069631	1.64836	0.363727	0.121059	0.024984	0.119067	0.184326	0.206796	1.15138	0.244212	0.256677	0.094912	0.141492	0.281445	0.301252	0.245395	0.151197	1.07991	0.467366	0.240015
BnaA01g04990D	0.262086	0.166326	0.282715	0.038988	0.078578	0.525407	0.077178	0.120424	0.572788	0.529832	0.137591	0.291943	0.186577	0.322811	0.263067	0.252112	0.404454	0.220488	0.164794	0.529727	0.193063	0.436515	0.173481	0.326761	0.090435	0.279171
BnaA01g05000D	0	0	0	0	0	0.073996	0.267706	0.097187	0	0	0	0.147158	0	0	0	0	0	0	0	0	0.146372	0.149349	0.283898	0.347337	0	0
BnaA01g05010D	0	0	0	0	0	0	0	0	0	0	0	0	0	0	0	0	0	0	0	0	0	0	0	0	0	0
BnaA01g05020D	1.09098	0.759949	0.607629	0.278983	0.316143	0.066374	0.080065	0.10046	0.457991	0.607823	0.238143	0.37801	0.24285	0.080884	0.931857	1.68026	1.69961	0.157567	1.1737	0.311015	0.154744	0.230499	0	0.919636	0.390683	0.962211
BnaA01g05030D	0	0	0	0.510292	0	1.36684	0	1.05089	0	0	0.152237	0	0.161192	0	0	0	0	0	0.240351	0	0.173396	0	0	0	0.101751	0.306674
BnaA01g05040D	0.488335	0.738558	0.213492	0.756161	1.42207	5.51791	5.4103	3.01337	0.374292	0.509055	0.302044	2.56624	3.2812	4.05716	0.768444	0.604513	0.7738	1.49051	1.57388	1.26709	1.08042	0.566887	0.612694	0.906732	0.592422	0.485407
BnaA01g05050D	0	0	0	0	0.053151	0	0	0	0	0	0	0.073612	0	0	0	0	0	0	0	0	0	0	0	0	0	0
BnaA01g05060D	0	0	0	0	0	0	0	0	0	0	0	0	0	0	0	0	0	0	0	0	0	0	0	0	0	0
BnaA01g05070D	1.85728	2.04307	1.18171	0.87116	1.14048	2.2917	2.49985	1.65457	2.33849	2.6289	1.31906	6.12812	7.65577	6.59508	0.363372	0.940455	0.119148	1.684	1.91254	1.40858	0.970635	0.597322	1.07245	1.64555	0.961439	1.71435
BnaA01g05080D	7.73365	8.43416	8.07735	4.5179	8.39202	6.29309	5.97945	6.89518	7.28843	11.6486	7.9432	9.48861	11.0805	8.98718	5.03477	4.62822	4.79261	5.87094	6.54024	6.65541	5.60029	3.80675	5.06152	8.0473	6.02099	6.67741
BnaA01g05090D	1.82595	1.98988	1.70937	3.00291	6.08353	7.89884	10.9121	8.03647	4.59303	4.91333	3.68095	9.35248	10.9636	10.66	2.52183	2.25412	2.17643	2.93857	3.80498	3.87519	4.02345	3.36387	4.72189	3.15327	1.85158	2.37031
BnaA01g05100D	4.77976	4.2841	3.94563	3.41469	4.56995	7.78317	5.12525	5.21862	5.29517	5.00377	3.80973	6.56156	7.25421	5.47756	3.84112	5.71203	3.85538	6.52006	9.56225	5.99841	3.34654	5.25601	3.90499	5.58274	6.03237	6.52662
BnaA01g05110D	5.4643	5.32308	5.84734	5.20198	6.31649	13.9628	12.0437	11.9659	4.41406	5.4496	5.71137	8.16161	8.03484	10.1372	8.02125	5.65202	6.10657	6.30637	9.12792	9.0341	6.52654	10.2727	9.23135	11.2345	13.67	11.4003
BnaA01g05120D	0	0	0	0	0	0	0	0	0	0	0	0	0	0	0	0	0	0	0	0	0	0	0	0	0	0
BnaA01g05130D	5.70118	8.04547	6.01134	2.3132	2.03888	4.0788	3.8004	6.73098	7.37875	8.97627	7.21864	21.7531	35.9891	35.0811	2.46858	3.66636	2.39959	8.91712	8.11763	7.93375	2.56803	3.34877	2.17978	8.34933	5.87721	5.58084
BnaA01g05140D	0.974211	1.11817	0.758132	0.538131	0.282782	1.55431	1.40882	1.88834	0.927071	0.892094	0.779106	2.08071	1.36578	2.07577	0.857911	0.968829	1.04143	2.87989	2.88958	3.14032	2.03627	1.58831	2.11413	1.95454	1.39151	1.90886
BnaA01g05150D	0	0	0	0	0	0	0	0	0	0	0	0	0	0	0	0	0	0	0	0	0	0	0	0	0	0
BnaA01g05160D	0	0	0	0	0	0	0	0	0	0	0	0	0	0	0	0	0	0	0	0	0	0	0	0	0	0
BnaA01g05170D	1.14134	0.822678	0.573011	0.118855	0.119083	0	0	0	0.819527	0.433631	0.260892	0	0.115624	0.126316	0.17032	0.295538	0.276715	0.217014	0.589392	0.103065	0	0.306434	0.095832	0.230493	0.144216	0.056223
BnaA01g05180D	0	0	0	0	0	0	0	0	0	0	0	0	0	0	0	0	0	0	0	0	0	0	0	0	0	0
BnaA01g05190D	21.9279	19.8184	22.047	1.71537	0.9023	0.137606	0.755487	0	11.0141	8.27624	20.5501	1.54856	1.92924	3.49317	8.62058	8.27435	7.4428	1.79801	1.59812	0.548801	3.95054	8.44569	1.91261	8.66335	8.46221	7.91616
BnaA01g05200D	0	0	0	0	0	0	0	0	0	0	0	0	0	0	0	0	0	0	0	0	0	0	0	0	0	0
BnaA01g05210D	0.039886	0	0	0.039312	0.017455	0	0.367895	0	0.039712	0	0	0	0.122372	0	0	0	0	0.015745	0	0	0.055429	0.078746	0.134254	0	0	0
BnaA01g05220D	2.17161	2.41362	1.7347	0.458138	0.960591	1.01065	0.94207	2.04587	1.94779	3.23873	1.7235	13.648	14.8389	14.6428	0.994828	1.52323	0.720659	2.22628	3.77729	3.33835	1.30182	1.20958	0.484619	2.29703	1.82114	1.75507
BnaA01g05230D	0	0	0	0	0.797243	0.976314	2.26871	0.583576	0	0	0	0	1.36389	0	0.980852	0	0	0	1.41473	0	0	1.84649	0	0	0	0
BnaA01g05240D	1.07788	0.997413	1.02366	0.336893	0.158576	0.016873	0.066623	0.050543	0.205587	0.267001	0.29449	0	0	0.05147	0.097278	0.251144	0.269514	0.227121	0.214776	0.291831	0.016578	0.059202	0	0.391655	0.160207	0.376275
BnaA01g05250D	0	0	0	0	0	0	0	0	0	0	0	0	0	0	0	0	0	0	0	0	0	0	0	0	0	0
BnaA01g05260D	0	0	0	0	0	0	0	0	0	0.032519	0.03199	0	0	0	0	0	0	0	0	0	0	0	0	0.041214	0	0
BnaA01g05270D	0	0.374222	0.184385	0.210805	0.098083	0.241689	0.171175	0.366974	0.5027	0.375093	0.473838	0.336654	0.456024	0.174814	0.451229	0.249971	0.402467	0.516828	0.258512	0.209174	0.149526	0.236144	0.152378	0.544157	0.612982	0.393741
BnaA01g05280D	0	0	0	0	0	0	0	0	0	0	0	0	0	0	0	0	0	0	0	0	0	0	0	0	0	0
BnaA01g05290D	0.098951	0.36478	0	0	0	0	0	0.306112	0	0	0.202877	0.116365	0.064955	0	0	0.163297	0.065672	0	0	0	0	0	0	0.020906	0	0.065705
BnaA01g05300D	9.43099	8.87829	8.16752	6.6051	4.71257	10.6113	14.2504	12.5182	8.76157	9.57567	9.05365	13.5269	10.8554	14.5355	7.93129	7.02258	6.99756	12.0995	8.47878	10.6525	14.1702	10.0382	11.8785	10.3354	8.21195	9.02102
BnaA01g05310D	0	0	0	0	0	0	0	0	0	0	0	0	0	0	0	0	0	0	0	0	0	0	0	0	0	0
BnaA01g05320D	5.32709	7.35137	6.40214	28.4525	28.2658	122.233	107.271	91.6876	23.4098	16.3463	25.7839	27.8366	20.2996	37.6927	17.5175	23.9319	14.0307	9.01847	9.76255	11.703	27.6676	28.4351	91.4752	9.23909	11.2959	10.1897
BnaA01g05330D	0	0	0	0	0	0	0	0	0	0	0	0	0	0	0	0	0	0	0	0	0	0	0	0	0	0
BnaA01g05340D	0	0.018225	0.026214	0.065952	0.088346	0	0.292885	0	0	0.010709	0.011412	0.011058	0	0	0	0	0	0	0	0	0	0	0	0	0.011273	0
BnaA01g05350D	0	0	0	0	0	0	0	0	0	0	0	0	0	0	0	0	0	0	0	0	0	0	0	0	0	0
BnaA01g05360D	0.008445	0	0	0.067688	0.079799	0.371103	0.888895	0.030286	0.034846	0.099626	0.30595	0	0	0.172784	0	0	0	0	0.298936	0	0.172852	0	0.607676	0.043199	0	0
BnaA01g05370D	0.777284	1.23788	0.915212	1.87795	1.27482	1.7359	1.84616	0.953825	1.96594	2.51145	1.38428	5.84324	5.17542	1.70454	0.397101	0.453938	0.683527	2.45385	1.54526	2.92344	1.75667	3.89784	5.48576	0.290394	1.39331	0.237066
BnaA01g05380D	0.467134	8.06754	0.174521	1.29319	0.717272	0.205016	7.24775	5.31645	4.93767	4.52667	6.97044	4.24785	7.15262	0.200609	4.20957	4.33355	0.077552	0.3578	2.55861	8.35377	0.033094	6.29913	0.097453	9.00738	6.60042	0.283361
BnaA01g05390D	1.53846	3.17058	1.4124	0.432854	0.739035	0.516846	0.409573	0.360696	1.38665	3.69865	1.16038	6.6854	11.8482	10.7404	0.292509	0.975615	0.405544	2.99987	1.54672	2.15211	0.41441	0.579283	0.351973	2.25942	1.9155	1.67237
BnaA01g05400D	0.308414	0.561945	0.066645	0.146731	0	0	0	0	0.540109	2.40045	0.636436	0	0	0	0.497327	0.374834	0	0	0	0	0.150621	0	0.138284	0	0	0
BnaA01g05410D	3.06428	4.1442	4.22246	0.949857	0.887527	12.8037	8.03929	10.6049	45.7257	22.3001	41.6225	10.3821	12.2	7.63822	6.25009	6.8995	2.96825	0.304925	0.242376	0	4.83533	6.9465	7.00963	1.50445	1.09885	1.30394
BnaA01g05420D	0	0.107664	0	0	0.097756	0	0	0	0	0	0	0	0.132734	0	0	0	0	0	0.107665	0.077019	0	0	0	0	0	0
BnaA01g05430D	0.179084	0.23711	0	0	0.184397	0	0	0	0	0.285292	0.123833	0	0	0	0	0	0.421942	0	0	0	0	0	0	0.174758	0	0
BnaA01g05440D	0	0	0	0	0	0	0	0	0	0	0	0	0	0	0	0	0	0	0	0	0	0	0	0	0	0
BnaA01g05450D	0.458826	0.224515	0.420323	0.160287	0.154767	0.159936	0.067596	0.261178	0.491185	0.419488	0.179755	0.49135	0.182383	0.502362	0.374997	0.729432	0.783736	0.446246	0.630032	0.334414	0.356266	0.171028	0.060155	0.512865	0.513604	0.355598
BnaA01g05460D	0	0	0	0	0.34213	0.189506	0.286283	0.330912	0	0.114335	0	0.12594	0	0	0	0	0.114728	0	0.10683	0	0	0	0	0	0	0
BnaA01g05470D	0	0	0	0	0	0	0	0	0	0	0	0	0	0	0	0	0	0	0	0	0	0	0	0	0	0
BnaA01g05480D	0.983031	1.29706	0.90153	0.574024	0.54649	0.444091	0.426322	0.840368	1.66742	1.58309	2.27005	1.63539	1.53338	1.64595	1.17438	1.50397	0.730946	1.22298	0.988051	0.811209	0.764427	0.451845	0.645841	1.53312	1.51894	1.59584
BnaA01g05490D	0	0	0	0	0	0	0	0	0	0	0	0	0	0	0	0	0	0	0	0	0	0	0	0	0	0
BnaA01g05500D	0.232031	0.206971	0.147269	0	0	0.188455	0	0	0.378781	0.64386	0.10105	0.188208	0.230639	0.282775	0	0.096425	0.125175	0.045124	0.06166	0.190622	0.061648	0.133584	0	0.147151	0.060673	0.280748
BnaA01g05510D	0	0	0	0.001633	0	0.000492	0.002322	0.00034	0.048772	0	0.067795	0	0.00224	0.001324	0	0	0	0	0	0	0	0.000816	0	0	0	0.001335
BnaA01g05520D	0.038272	0.03762	0	0	0	0	0.078476	0.038665	0	0	0	0	0	0	0.11175	0	0	0	0.037926	0	0	0	0	0	0.07002	0.027051
BnaA01g05530D	10.3049	12.6798	9.24299	8.36474	11.6004	12.6208	14.7808	16.2335	9.00052	5.26749	7.20196	22.587	20.353	20.3144	8.11926	7.84362	6.96874	26.6501	22.2257	19.7544	9.11726	15.6922	11.4602	13.2714	13.681	12.7848
BnaA01g05540D	0.628242	0.246132	0.184701	0.011828	0.10356	0.025617	0.00716	0	0.212124	0.841461	0.353975	0.03372	0	0.015331	0.010757	0.034032	0.206752	0	0.213231	0.122543	0.134208	0.010897	0.067827	0.362095	0.685519	0.395268
BnaA01g05550D	0.985986	1.4268	0.364412	0.423521	0.874788	0.156782	0.979816	0.197893	0.268475	0.620104	0.480194	0.377306	0.068692	0.441894	0.276058	0.299876	0.413043	0.22255	0.692961	0.282749	0	0.280482	0	0.754368	0.766389	1.33702
BnaA01g05560D	1.06361	1.14012	0.905825	1.41701	1.2208	1.85397	2.51377	1.98728	1.03285	0.628416	0.819445	1.72616	1.59762	2.90233	1.05866	1.09316	0.48685	2.17545	1.61464	1.49154	1.71784	2.85146	2.13325	2.30125	1.90365	1.72839
BnaA01g05570D	0.559643	0.644067	0.411499	0.442448	0.369936	1.00987	0.727217	1.10185	0.13683	0.380446	0.574366	0.642591	0.649145	0.781631	0.507645	0.521626	0.740303	0.787211	1.18168	0.622405	0.808258	0.920206	0.938434	0.512394	0.7479	0.674356
BnaA01g05580D	0	0	0	0	0	0	0	0	0	0	0	0	0	0	0	0	0	0	0	0	0	0	0	0	0	0
BnaA01g05590D	0	0	0	0	0.021699	0	0	0	0	0	0	0	0	0	0	0	0	0	0	0	0	0	0	0	0	0
BnaA01g05600D	0	0	0	0	0	0	0	0	0	0	0	0	0	0	0	0	0	0.050843	0	0	0	0	0	0	0	0
BnaA01g05610D	0	0	0	0.295914	0.197398	0.464986	0	0	0	0	0.405139	0.36512	0.757128	0	0	0	0	0	0	0	0	0.17772	0	0.144196	0	0
BnaA01g05620D	4.63565	5.60521	5.6242	1.3783	1.67525	3.42617	3.6071	3.51866	2.90484	4.18986	4.03005	0.56655	0.418486	0.865748	2.58719	1.56633	2.30616	2.86587	3.75589	3.13018	2.04844	1.70169	1.85117	7.29296	8.28454	6.61394
BnaA01g05630D	0.056059	0.088716	0.059166	0.098009	0.357348	0	0	0	0.026125	0.030751	0.13256	0.124973	0.251193	0.191412	0.131841	0.045634	0.174561	0.419747	0.129793	0.260469	0.178295	0.031137	0	0.117775	0.06172	0.04069
BnaA01g05640D	0	0	0	0	0	0	0	0	0	0	0	0	0	0	0	0	0	0	0	0	0	0	0	0	0	0
BnaA01g05650D	0	0	0	0	0	0	0	0	0	0	0	0	0	0	0	0	0	0	0	0	0	0	0	0	0	0
BnaA01g05660D	0.384141	0.004958	0.461956	0	0.250045	0.232689	0.569715	0	0	0	1.01904	1.80389	0.63928	1.22769	1.52361	2.53541	0.295811	0	0	0	0	0.898128	1.14835	0	0	0
BnaA01g05670D	14.8294	12.1173	12.5255	9.96916	8.93654	21.813	18.5746	19.5245	11.6234	10.8841	10.5669	17.509	13.1473	21.3535	19.6463	20.1473	17.921	20.3965	14.8908	20.4953	22.8671	21.6698	28.5165	12.069	15.1325	12.7621
BnaA01g05680D	0	0	0	0	0	0	0	0	0	0	0	0	0	0	0	0	0	0	0	0	0	0	0	0	0	0
BnaA01g05690D	5.92016	6.12686	6.68147	4.45086	4.35529	9.58871	10.5026	9.2661	3.49571	4.98266	3.71678	4.05576	3.98201	5.32805	4.3936	4.63219	3.85491	4.73533	5.16679	5.30469	6.02931	6.06173	4.65225	10.4259	9.62291	9.79813
BnaA01g05700D	0	0.254436	0	0	0	0.587393	0.295356	0.304801	0	0.065944	0.108324	0.215404	0.076774	0.310936	0.046769	0	0.035126	0.282676	0.172017	0.295391	0.16563	0	0.285629	0.282902	0.034674	0.310586
BnaA01g05710D	0	0	0	0	0	0	0	0	0	0	0	0	0	0	0	0	0	0	0	0	0	0	0	0	0	0
BnaA01g05720D	4.9462	6.88081	4.845	3.53475	1.57675	0	0.651112	0.508011	2.96936	4.97375	1.72382	0.328338	0.37415	0.475203	2.47846	3.45138	3.06973	1.77588	3.32908	1.05795	2.43681	1.70361	0.747319	3.27478	2.92155	5.76025
BnaA01g05730D	0.182066	0.305364	0.238887	0	0	0	0.101712	0.066966	0.093184	0.241249	0.121641	0.230759	0.056405	0	0.033333	0.066505	0.107799	0.055503	0	0	0.091591	0.229935	0.051202	0.098319	0.474872	0.125545
BnaA01g05740D	0	0	0	0	0	0	0	0	0	0	0	0	0	0	0	0	0	0	0	0	0	0	0	0	0	0
BnaA01g05750D	0	0	0	0	0	0	0	0	0	0	0	0	0	0	0	0	0	0	0	0	0	0	0	0	0	0
BnaA01g05760D	0	0	0	0	0	0	0	0	0	0	0	0	0	0	0	0	0	0	0	0	0	0	0	0	0	0
BnaA01g05770D	0.291459	0.291968	0.256981	0.141598	0.07247	0.07366	0.093685	0.071996	0.134143	0.23343	0.253095	0.283688	0.333897	0.179861	0.200588	0.233521	0.052989	0.260926	0.167277	0.329817	0.115063	0.194498	0.150984	0.377635	0.351715	0.239647
BnaA01g05780D	2.79615	3.88111	3.25121	2.91319	2.12052	5.78172	4.99824	7.79322	6.21347	6.25856	4.69611	6.55601	5.33307	8.64407	4.19501	3.76527	3.40832	5.55187	7.63544	8.37002	5.92969	5.93077	5.00441	6.17632	7.0483	5.61682
BnaA01g05790D	0	0	0	0	0	0	0	0	0	0	0	0	0	0	0	0	0	0	0	0	0	0	0	0	0	0
BnaA01g05800D	0.447655	0.476164	0.501471	0.308933	0.726576	1.2482	1.24028	1.39871	0.206559	0.190556	0.334798	0.652299	0.917681	0.787983	0.637617	0.609076	0.260917	0.60056	0.810418	0.554462	0.385795	1.16731	0.972994	0.528227	0.502542	0.687193
BnaA01g05810D	1.47449	1.25093	1.24646	1.72905	1.21569	3.77789	3.84498	3.28904	1.29369	0.935749	1.38936	2.77768	2.15501	2.76933	1.34596	0.938457	0.811279	2.15617	1.77101	1.95701	2.67941	2.1336	2.61012	2.48351	1.72114	2.49173
BnaA01g05820D	3.6041	3.92748	4.41158	5.04023	7.26441	20.0205	20.6866	20.7049	6.2745	7.31828	5.08049	9.53038	9.09855	8.82028	4.70617	4.21613	4.78496	7.38118	8.07591	6.80437	11.2967	10.775	11.1286	9.22602	9.47545	8.69411
BnaA01g05830D	2.58539	1.71242	2.41049	1.87638	2.27583	2.88705	2.91195	2.57297	1.6363	2.22872	2.39067	3.76678	3.22381	3.12442	2.10574	1.38637	1.70712	2.85659	2.13488	2.76983	2.9737	2.07144	3.14696	2.36458	2.25377	2.69331
BnaA01g05840D	64.2214	56.8583	60.8202	78.2254	70.736	53.571	92.6845	72.7762	54.8032	62.3132	55.2197	64.0081	54.3308	75.8275	55.1945	39.7345	39.4694	60.5651	47.2345	57.0696	93.064	90.0538	92.9559	58.6128	59.5179	57.2508
BnaA01g05850D	0	0	0	0	0	0	0	0	0	0	0	0	0	0	0	0	0	0	0	0	0	0	0	0	0	0
BnaA01g05860D	0.079646	0	0	0.171758	0	0	0	0	0	0	0	0	0	0	0	0	0	0	0	0.163299	0.638025	0	0.223295	0	0.093198	0.0791
BnaA01g05870D	0	0	0	0	0	0	0	0	0	0	0	0	0	0	0	0	0	0	0	0	0	0	0	0	0	0
BnaA01g05880D	0	0	0	0	0	0	0	0	0	0	0	0	0	0	0	0	0	0	0	0	0	0	0	0	0	0
BnaA01g05890D	0.906217	1.94209	1.21825	0.216641	0.452199	0.157161	0.220046	0.319383	0.532349	0.411386	0.449059	0	0.262366	0	1.1289	2.09219	2.00746	1.59668	0.893404	1.05686	0.155874	0.160542	0.127822	1.2666	1.56681	1.09442
BnaA01g05900D	0.868274	0.605892	0.870059	0	1.10491	0	0	0	0.576014	0	0	0.600011	0	0.678313	0.466651	1.0169	0.727721	1.90975	0.90454	0.012402	1.06685	1.04322	0.776182	0.976658	0.054837	0.905932
BnaA01g05910D	0.024468	0	0	0.038358	0.102278	0	0.154291	0	0	0.050362	0.102152	0.100492	0	0	0	0	0.025158	0	0	0	0.040482	0	0	0	0	0
BnaA01g05920D	11.1864	11.3406	11.2361	33.3929	63.6117	35.5323	43.9971	29.3037	11.7344	15.1835	11.2797	59.1473	63.7224	48.8729	12.1731	12.4419	12.4256	30.3417	26.4117	28.7048	29.2364	25.0636	25.4629	16.9649	17.4765	18.4409
BnaA01g05930D	0	0	0	0	0	0	0	0	0	0	0	0	0	0	0	0	0	0	0	0	0	0	0	0	0	0
BnaA01g05940D	0	0	0	0	0	0	0	0	0	0	0	0	0	0	0	0	0	0	0	0	0	0	0	0	0	0
BnaA01g05950D	7.88948	6.99382	7.40982	4.83544	6.20114	10.1173	9.25402	8.3615	6.63579	5.01627	4.72591	5.67296	6.47458	8.58021	7.17634	6.21897	6.8302	7.25577	7.87885	8.54864	4.43652	4.23298	5.41909	6.40057	6.51837	7.59209
BnaA01g05960D	0.048916	0.356769	0.142846	1.04512	0.406715	3.85672	9.25437	2.54773	0.388323	0.171007	0.298333	0.421731	0.596954	0.558483	0.047609	0.232601	0	0.095406	0.339311	0.149855	0.241346	0.470346	0	1.31234	1.12719	1.37778
BnaA01g05970D	0.039078	0.001287	0.020885	0.095125	0.032611	0.040881	0.072741	0.05021	0.011429	0.012237	0.012482	0.155935	0.170731	0.234107	0.025451	0.088026	0.043782	0.08134	0.043261	0.033196	0.049605	0.05831	0.059787	0.09232	0.030785	0.005683
BnaA01g05980D	0.520105	1.36566	0.550795	1.13931	0.660069	8.20468	7.03119	7.04864	1.57983	1.67079	3.4232	3.26496	1.90717	2.33562	1.73189	1.87309	1.57143	1.85082	1.94701	2.2552	3.54977	2.55118	6.98685	1.22168	0.982459	1.81474
BnaA01g05990D	0.026474	0	0	0	0	0	0	0	0.067813	0	0	0.000714	0	0	0	0	0.040518	0.001008	0	0	0	0	0	0.005357	0	0
BnaA01g06000D	1.82309	2.8044	2.23519	1.4273	1.5805	4.13033	3.51497	4.42935	1.7268	2.46581	1.43186	4.58889	4.72446	4.87671	1.94593	1.54028	1.53486	3.32051	3.98641	3.55509	2.61213	2.74041	3.10812	2.94596	2.52733	2.69814
BnaA01g06010D	10.5547	10.4535	8.80526	8.95417	9.70083	20.4259	17.5001	21.0026	11.3797	11.5403	10.867	29.631	30.92	36.0048	7.86648	11.1693	8.43263	16.6206	16.2775	17.7567	11.5989	12.46	11.2301	12.2088	10.9671	12.3703
BnaA01g06020D	8.40361	10.5539	7.37667	12.7971	11.1304	17.3768	18.061	13.438	22.3951	25.7458	32.5796	21.1676	26.6904	21.0885	12.9373	14.9981	8.85609	20.452	18.6762	21.2914	18.9826	15.1932	19.6652	13.8794	12.8131	12.1026
BnaA01g06030D	2.51719	2.23171	2.11499	4.77968	6.74618	2.96537	3.17617	3.79893	11.734	11.6014	6.84511	24.423	25.8659	18.9243	1.78283	1.4445	3.09925	3.76901	4.77901	3.95541	3.68087	2.36917	3.73068	5.03611	3.75884	4.33761
BnaA01g06040D	4.8695	6.26964	6.05657	5.84241	4.96138	4.58884	4.04318	4.57691	4.90983	5.71704	5.9704	4.05995	3.82894	4.06557	7.25884	8.16652	7.39625	7.97818	8.63327	10.535	11.6133	10.2616	13.9125	5.83011	5.19985	4.73361
BnaA01g06050D	0	0	0	0	0	0	0	0	0	0	0	0	0	0	0	0	0	0	0	0	0	0	0	0	0	0
BnaA01g06060D	0	0	0	0	0	0	0	0	0	0	0	0	0	0	0	0	0	0.026078	0.030623	0.037608	0	0	0.016961	0	0	0.02186
BnaA01g06070D	0	0	0	0	0	0	0	0	0	0	0	0	0	0	0	0	0	0	0	0	0	0	0	0	0	0
BnaA01g06080D	0	0	0	0	0	0	0	0	0	0	0	0	0	0	0	0	0	0	0	0	0	0	0	0	0	0
BnaA01g06090D	0.09179	0.263876	0.183657	0.075435	0.040411	0.14524	0.151544	0.082783	0.05674	0.363349	0.064711	0.196101	0.506292	0.578344	0.181572	0.170421	0.044057	0.147805	0.061334	0.284308	0	0.02673	0.103059	0.144605	0.189499	0.152732
BnaA01g06100D	0	0.107522	0	0	0	0	0	0	0	0	0.322461	0	0	0.122298	0	0	0	0	0.178161	0	0	0	0	0	0	0
BnaA01g06110D	0	0.18173	0.059534	0	0	0.110932	0.110281	0.072306	0.13747	0.349113	0.060335	0	0	0.075982	0	0	0.097346	0.211299	0.362686	0.304933	0.182163	0	0.066005	0.545049	0.069866	0.751519
BnaA01g06120D	0	0	0	0	0	0	0	0	0	0	0	0.004455	0.000383	0	0	0	0	0	0.002729	0	0	0	0	0	0	0
BnaA01g06130D	3.91887	5.18919	4.48032	1.03921	1.61558	1.2138	0.994467	1.69753	5.90108	6.14985	3.74184	3.42246	2.6867	1.97655	2.90739	4.93231	3.19158	5.55117	9.90264	8.18346	2.0118	2.79899	1.02789	5.62071	4.91831	6.11628
BnaA01g06140D	0.297963	0.35721	0.201285	1.14973	0.476773	1.69152	0.423515	0.624842	0	1.79521	1.9404	0.243179	0	0	0.804091	0.742019	0.996972	0.521892	0.47548	0.65427	0.963614	1.33888	0.861124	3.2688	2.40719	4.56856
BnaA01g06150D	0.845893	0.981435	1.59517	1.03907	0.958883	1.95193	1.77738	0.749047	0.368098	0.54355	1.04321	0.312061	0	0.347869	1.05926	0.732807	1.557	0.361192	1.19992	0.931159	0.969019	1.53394	0.958826	3.10881	4.58371	2.53975
BnaA01g06160D	5.97735	7.38037	5.71312	4.91337	2.97598	6.74733	3.64755	4.80925	3.11083	4.7679	4.15651	1.91023	1.22527	2.22515	5.28425	5.08964	5.40067	8.16432	5.46014	6.09647	5.16989	5.88866	4.57491	7.22159	7.38656	5.66676
BnaA01g06170D	0.912248	1.66827	0.432289	0.884282	1.56776	2.25286	4.01653	3.79823	0.253247	1.34298	0.475746	4.08001	2.93015	3.99039	0.909745	1.06364	0.793722	6.19368	2.62382	7.00492	1.76176	1.51388	0.939755	2.24319	1.90117	2.48608
BnaA01g06180D	0	0	0	0	0	0	0	0	0	0	0	0	0	0	0	0	0	0	0	0	0	0	0	0	0	0
BnaA01g06190D	32.7198	33.3679	33.6044	18.2099	17.7225	1.91816	4.80795	4.18122	22.0753	23.3078	23.5223	8.3988	8.05219	9.02389	16.4635	13.2561	18.6486	17.5785	19.1858	16.3122	14.5457	14.7325	7.66231	32.9993	27.3808	29.2007
BnaA01g06200D	0	0	0	0	0	0	0	0	0	0	0	0	0	0	0	0	0	0	0	0	0	0	0	0	0	0
BnaA01g06210D	2.25467	2.6802	1.68027	0.455792	0.513461	1.24742	1.10038	1.24482	1.96222	2.40646	1.04469	11.2995	15.9456	14.3601	0.56541	1.4005	0.501842	3.26011	2.71552	3.31931	0.530626	1.11671	0.586874	1.58643	1.43058	1.70631
BnaA01g06220D	19.7162	19.5705	21.5248	15.8921	16.3536	12.6274	13.4175	15.6938	12.8398	12.8145	10.4398	8.91228	8.68408	11.2199	20.1253	18.7344	19.1577	13.1632	14.3194	12.9088	16.7995	13.1471	12.4052	13.8207	14.0891	14.8228
BnaA01g06230D	0.63469	1.08329	0.817385	0.498361	0.448325	2.32283	2.39809	0.990506	0.800207	0.9702	0.519871	0.80018	0.745979	1.24655	0.336238	0.669349	0.771242	0.814179	1.28422	0.800241	1.27663	1.7851	1.05589	1.39217	0.775779	1.67537
BnaA01g06240D	0.356307	2.08287	1.71884	0.199749	0.261769	1.34671	0.393737	0.334546	2.96086	0.272304	0.441651	0.252851	4.56101	3.64544	4.38454	0.27631	0.487612	0.246442	7.75166	0.220401	0.338004	3.99029	0.29873	5.61094	5.83128	0.352052
BnaA01g06250D	0	0	0	0	0.011711	0	0	0.035897	0.010748	0.000221	0.009306	0.005817	0	0	0.008515	0	0	0.012889	0	0	0.00157	0.003412	0	0	0	0
BnaA01g06260D	0	0	0	0.08409	0	0	0	0	0	0	0	0	0	0	0	0	0.130241	0	0	0	0	0.129949	0	0	0	0
BnaA01g06270D	0.351708	0.242948	0.768552	2.34157	3.48683	0.479217	0.856962	0.314992	0.763079	0.965617	1.77416	1.84527	0.681144	0.861066	0.253417	0.82794	0.522393	0.504741	0.496273	0.421832	0.366794	0.476206	0.685581	0.829035	0.334701	0.845757
BnaA01g06280D	0	0	0	0	0	0	0	0	0	0	0	0	0	0	0	0	0	0	0.278307	0.191062	0	0	0	0	0	0
BnaA01g06290D	0.373827	0.093317	0.084831	0.288413	0.317118	0	0	0	0.117411	0.103952	0.089535	0.112281	0.086763	1.11284	0.148979	0	0.085812	0.103661	0.141333	0.112103	0	0.65589	0	0.816644	0	0.503254
BnaA01g06300D	0	0	0	0	0	0	0	0	0	0	0	0	0	0	0	0	0	0	0	0	0	0	0	0	0	0
BnaA01g06310D	4.4928	5.49664	5.15048	2.66798	2.06146	2.55318	2.59448	3.10014	2.86094	2.67705	2.2426	0.329363	0.489656	0.606971	2.36509	2.24355	1.9385	2.59873	2.73931	2.52226	2.18353	1.93527	1.2731	5.59305	4.53012	4.82661
BnaA01g06320D	0.041129	0.038945	0	0	0	0	0.036284	0.164539	0	0	0	0	0	0	0	0.039608	0	0	0	0	0	0	0.13563	0	0	0
BnaA01g06330D	14.0878	14.9523	13.5719	9.03854	10.1679	16.6657	14.9095	14.9171	8.84062	9.22635	7.60123	5.69986	3.73398	7.33895	9.70428	9.98714	12.0069	15.1534	14.366	17.3711	10.5624	10.4057	9.91765	10.4349	11.3813	12.511
BnaA01g06340D	0	0	0	0	0	0	0	0.442509	0	0	0	0	0	0	0	0	0	0	0	0	0	0	0.467533	0	0	0
BnaA01g06350D	2.13222	2.10019	3.33581	8.74411	8.59291	4.24307	8.82879	4.87767	3.5526	3.74058	6.25603	2.58507	1.21025	2.1852	4.1739	2.0989	3.85925	4.45409	3.85558	4.04657	6.34337	6.82241	6.84379	2.93032	3.26029	3.47797
BnaA01g06360D	0	0	0	0.274792	0.342735	0	0.087323	0	0.009115	0.043914	0	0	0	0	0.113375	0.289586	0.094438	0	0	0	0	0	0	0	0	0
BnaA01g06370D	0	0	0	0	0	0	0	0	0	0	0	0	0	0	0	0	0	0	0	0	0	0	0	0	0	0
BnaA01g06380D	0.703696	0.721283	0.397407	0.22252	0.290584	0.675372	0.390475	0.327679	0.451856	0.827253	0.384786	0.88731	1.17462	1.05977	0.25316	0.327444	0.330003	0.553046	0.593069	0.603316	0.438325	0.251522	0.345342	0.892121	0.547093	0.50838
BnaA01g06390D	0	0	0	0	0	0	0	0	0	0	0	0	0	0	0	0	0	0	0	0	0	0	0	0	0	0
BnaA01g06400D	0	0	0	0	0	0	0	0	0	0	0	0	0	0	0	0	0	0	0	0	0	0	0	0	0	0
BnaA01g06410D	0.025119	0.044407	0.050713	0.37122	0.146648	0.118333	0.463021	0.795336	0.105285	0.038644	0.057227	3.92989	0.407231	0.142735	0	0	0.057041	0.078455	0.03766	0.365782	0.078823	0	0.072474	0.194347	0.138764	0.193844
BnaA01g06420D	0	0.689358	1.46842	1.14868	0.89136	0.819004	2.23395	1.22033	0	1.63099	0.772418	0	0	0	1.12062	0.942075	0.916995	0.296045	1.00243	1.42277	2.12152	0	0.902454	0	1.42708	2.13287
BnaA01g06430D	0.16647	0.193737	0.43343	0.104914	0.084927	0.071613	0.064252	0	0	0.130032	0.141989	0.146856	0	0.037105	0.046259	0.059667	0.144143	0	0.033102	0.024227	0.035494	0.02342	0.060073	0.152814	0.155058	0.249884
BnaA01g06440D	0.089659	0	0	0	0	0	0.097729	0	0	0.307622	0.01545	0.127567	0.102821	0	0	0	0	0	0.162126	0	0	0.072019	0	0	0	0
BnaA01g06450D	1.10614	0.65119	0.673659	0.818046	1.2151	1.37932	1.34	2.00918	1.77616	0.382443	1.60822	0.633506	0.676433	0.467258	1.43783	0.857731	0.719188	1.25078	1.03548	1.83527	1.69069	0.566027	0.733205	1.55569	1.70701	1.55418
BnaA01g06460D	3.45761	2.92477	2.15856	2.23223	2.54836	2.17676	2.55013	2.12159	2.23549	3.3871	2.71428	8.23277	14.1173	8.84113	2.36603	2.53743	2.10085	3.93877	3.1938	3.96358	1.35429	1.06365	0.960028	4.82507	3.3526	4.00037
BnaA01g06470D	0	0	0.127867	0	0	0.088312	0.089484	0.172532	0	0	0.044409	0.169371	0.157977	0.353888	0	0	0	0	0	0	0	0	0	0.065458	0.087739	0.111404
BnaA01g06480D	0	0	0	0.155433	0.193562	2.53831	0.723038	0	0	0	0	0.253361	0	0	1.60789	0	0	0	0	0	0.207961	0	0.233703	0	0.222676	0.525009
BnaA01g06490D	2.77455	5.04944	2.45958	18.5257	17.6018	91.3201	53.7801	87.0051	58.2991	42.3407	41.2742	205.265	207.238	195.371	16.3165	40.3782	9.62781	5.52548	7.79641	6.56515	99.0991	31.3483	89.5131	2.88606	4.15209	3.18451
BnaA01g06500D	0.066515	0.051386	0.053316	0	0.061066	0	0	0.04919	0.088505	0.066628	0.493171	0.13295	0.06697	0	0	0	0	0	0.052756	0.067923	0.051699	0	0.067143	0	0.266311	0
BnaA01g06510D	0	0	0	0	0.049545	0	0	0	0	0	0	0	0	0	0	0	0	0	0	0	0	0	0	0	0	0
BnaA01g06520D	1.38773	2.09995	0	1.98088	1.81692	1.95517	0	3.23072	1.91264	2.21188	2.1249	3.00997	1.81874	3.57033	0	1.7394	2.8326	0	6.3039	4.64696	3.02499	4.6658	5.11419	3.16334	0	0
BnaA01g06530D	11.761	11.7385	10.2516	9.19755	15.5849	22.9924	29.0296	19.1461	32.9333	27.8699	33.3475	23.2482	23.7378	17.0641	9.66814	12.2995	11.4741	20.6773	21.8506	17.3386	22.0401	15.4137	17.1789	17.2169	14.1711	17.6348
BnaA01g06540D	36.959	41.7733	40.1066	42.2654	84.7985	26.5604	27.8917	18.7732	81.0187	85.8412	63.0666	44.897	47.5227	49.5943	26.5246	30.1803	35.2011	58.1554	48.1417	49.9339	33.2649	19.4964	14.6593	25.7766	20.1919	21.148
BnaA01g06550D	0.247657	0.175742	0.078716	0.137641	0.081849	0.114307	0.172227	0.208294	0.049556	0	0	0.167995	0	0.110884	0.116293	0.187503	0.120479	0.275234	0.130349	0	0	0.116761	0.190927	0.57893	0.561361	0.34554
BnaA01g06560D	0	0	0	0	0	0	0	0	0	0	0	0	0	0	0	0	0	0	0	0	0	0	0	0	0	0
BnaA01g06570D	0.534849	0.146924	0.284414	0.064714	0.340335	0.894944	1.30092	0.776791	0	0	0	0	0	0	0.218584	0.596894	0.184262	0.344916	0.576155	0.377516	0.293451	0.265756	0.637297	0.672715	0.674018	1.07188
BnaA01g06580D	0	0	0	0	0	0	0	0	0	0	0	0	0	0	0	0	0	0	0	0	0	0	0	0	0	0
BnaA01g06590D	0	0	0	0	0	0	0	0	0	0	0	0	0	0	0	0	0	0	0	0	0	0	0	0	0	0
BnaA01g06600D	0.672382	0.233699	1.2146	1.33003	1.12467	0.504382	0.716716	1.32644	0.281019	4.82848	0.164628	0.789215	1.38556	1.33143	0.412528	0.763635	0.443411	1.44171	2.19031	2.30094	2.10405	0.90852	0.661656	1.15409	1.64128	2.40522
BnaA01g06610D	14.1062	14.0703	11.6249	18.9119	19.5829	23.8468	24.6787	23.2986	14.3464	20.1062	14.2876	40.9804	37.2196	25.5783	32.092	24.9563	29.6659	42.7184	37.7348	38.868	18.6097	18.8172	23.1411	19.5367	24.003	22.8537
BnaA01g06620D	0.073942	0	0.144433	0	0	0.262729	0.678724	0	0.142649	0	0.393787	0.955978	1.37141	0.527597	0.071485	0.406529	0.368728	0	0.141312	0.07576	0	0	0.344497	0	0.147415	0
BnaA01g06630D	0	0	0	0	0	0	0	0	0	0	0	0	0	0	0	0.03285	0	0	0	0	0	0	0	0	0	0
BnaA01g06640D	0.82206	0.507942	0.755248	0	0	1.16229	0.247311	0.601395	0.064018	0.061489	0.130201	0	0	0	0.12516	0.175716	0.229135	0	0.063501	0	0.064559	0.065653	0.049006	0.860415	0.444414	0.990315
BnaA01g06650D	0	0	0	0	0	0	0.356712	0.077379	0	0	0	0	0	0	0	0	0	0	0	0	0	0	0	0	0	0
BnaA01g06660D	2.16828	2.56362	2.1692	1.1689	0.928651	2.68615	3.59645	1.95865	2.68702	2.21445	1.73911	4.64508	4.85986	4.18192	1.44613	1.87468	2.38597	3.25336	3.2347	4.56603	1.80905	4.15545	3.91852	2.40193	2.856	3.38551
BnaA01g06670D	0	0	0	0	0	0	0	0	0	0	0	0	0	0	0	0	0	0	0	0	0	0	0	0	0	0
BnaA01g06680D	1.27736	1.65864	0.913056	0.63254	0.358857	0.413621	0.668572	0.439812	3.76547	3.5569	3.33587	3.71923	3.59809	1.85376	0.743481	1.10867	0.501916	0.657315	0.819237	0.612412	0.814223	1.01979	0.583828	0.617722	0.458696	0.610092
BnaA01g06690D	0	0	0	0	0	0	0	0	0	0	0.186775	0	0	0	0.05607	0	0	0	0	0	0	0	0	0	0	0
BnaA01g06700D	2.99024	4.24692	2.55675	1.12225	0.890658	3.29335	2.31607	3.99303	1.41896	1.66483	1.775	1.28415	0.793918	1.8626	2.81382	3.28897	2.86634	4.02105	4.17755	3.64182	2.30853	2.82614	2.11427	5.80886	4.84726	5.35516
BnaA01g06710D	0.376655	0.322737	0.254903	0	0	0	0.117018	0	0.798867	0.842624	0.338376	0	0.285053	0	0	0.090004	0	0	0	0	0	0	0	0	0.093318	0.058743
BnaA01g06720D	0	0	0	0	0	0	0	0	0	0	0	0	0	0	0	0	0	0	0	0	0	0	0	0	0	0
BnaA01g06730D	2.35345	3.50955	0.553374	2.86542	2.83044	0	0.938281	0	2.39397	3.17853	8.89837	1.26493	0.167157	0.059777	3.05422	4.45336	1.45144	1.31594	0.078359	0.226738	0.213858	0	0.671052	0	0	0
BnaA01g06740D	0	0.141485	0.101397	0.650615	1.68913	0	0.306763	0	0.477434	2.95155	3.07827	11.8587	11.977	0.801013	5.45524	15.8999	2.61178	0.294086	0.104037	0.798084	0	0.059648	0.081254	0.058805	0	0
BnaA01g06750D	0.150692	0.376016	0.048725	2.47117	1.25737	55.9524	42.2309	40.5556	9.12211	10.7506	13.2359	37.4278	35.3528	10.1722	50.0616	42.2733	18.6315	6.87133	3.64953	4.75272	3.37894	2.50849	5.15349	3.46196	4.56684	4.77122
BnaA01g06760D	3.44081	2.75599	2.09662	3.10365	3.64186	2.80342	3.12527	3.73251	5.17655	4.74244	5.60665	7.48407	7.60156	4.79605	2.97919	2.62376	3.34345	3.31284	3.73842	2.46288	2.06685	2.24706	1.21748	2.61008	3.40152	3.7231
BnaA01g06770D	0.075056	0.174457	0.036652	0.085467	0.262326	0.075815	0.115424	0	0.107809	0.571643	0.048754	1.51605	0.707733	0.201309	0.145857	0.037148	0.167224	0.167211	0.070482	0.09732	0.109197	0.231457	0	0.47863	0.311434	0.094032
BnaA01g06780D	2.84535	4.58818	2.80932	3.93246	3.46969	6.19414	8.16663	4.35074	6.26688	5.51135	6.48829	14.2305	13.072	8.63172	6.08527	5.519	5.64336	6.58054	6.61551	5.88209	5.15252	4.88258	7.67527	3.68508	4.49685	3.31148
BnaA01g06790D	0.564955	0.285529	0.41302	0	0	0	0	0	0.165435	0.241335	0.113015	0.43813	0.610528	0.42784	0	0.105403	0.066506	0	0.08361	0	0.131874	0	0	0.228713	0	0.235437
BnaA01g06800D	9.43315	7.75465	2.44974	7.09863	6.95334	0.586946	0.830127	0.696651	6.98908	3.43526	3.08934	4.34883	2.22454	2.53008	6.24861	4.80903	2.02338	4.06204	3.70626	2.21268	1.2705	7.10638	1.18446	1.20839	6.57008	10.4532
BnaA01g06810D	4.18392	4.32461	4.75868	12.3156	9.90988	7.14405	8.5535	5.78801	1.64122	2.37626	2.27272	2.19674	1.91134	2.12423	3.3887	1.70734	3.06697	3.56448	3.51619	3.14122	8.13433	10.9495	9.48515	4.38779	6.13319	5.27482
BnaA01g06820D	85.622	81.3398	77.0996	37.2142	37.7911	41.1789	57.4218	31.4786	99.0148	99.9349	98.8045	71.8474	77.519	70.861	38.6539	32.5454	35.249	62.6284	52.1371	59.8562	71.2023	62.0303	56.672	55.898	50.8148	52.2917
BnaA01g06830D	0	0	0	0	0	0	0	0	0	0	0.045038	0	0	0	0	0	0	0.040607	0	0.156676	0	0	0	0	0	0
BnaA01g06840D	0	0	0	0	0	0	0	0	0	0	0	0	0.10591	0	0	0	0	0	0.132826	0	0	0	0	0	0	0
BnaA01g06850D	0	0.020354	0	0	0	0.129331	0	0	0	0	0	0	0	0	0	0	0	0	0	0	0	0	0	0	0.028714	0.147145
BnaA01g06860D	0.579444	0.493592	0.240057	0.028881	0.04052	0.193601	0.062221	0.204374	0.199725	0.198045	0.162836	2.66904	3.57778	2.18751	0.235355	0.351292	0.040628	0.341005	0.697123	0.577599	0.080406	0.122873	0.109049	0.406059	0.309579	0.309957
BnaA01g06870D	0.279624	0.230055	0.078539	0	0.14474	0	0	0.047956	0	0.047709	0	0	0	0	0.126235	0.142497	0.143594	0.096096	0.368679	0	0	0.048308	0	0.556897	0.410147	0.29366
BnaA01g06880D	0.340528	0.288087	0.604496	0.136747	0.095723	0	0	0.197708	0.097254	0.042208	0	0	0	0.194612	0.423173	0.08892	0.041156	0.139176	0	0.246379	0	0.14818	0	0.372967	0.165664	0.192769
BnaA01g06890D	0.355373	0.296771	0.182764	0.047505	0.143877	0	0	0	0.065332	0.076372	0.064481	0.17466	0.052746	0.040666	0	0.022943	0.165817	0	0.06296	0.051558	0.243001	0.101131	0.102189	0	0.102103	0.02616
BnaA01g06900D	0.115502	0.114555	0	0.064209	0	0	0	0	0.188184	0.237861	0.357903	0.116992	0	0.121244	0	0.176633	0.078366	0	0.037765	0	0	0	0	0	0.039225	0.040166
BnaA01g06910D	0	0	0	0	0	0	0	0	0	0	0	0	0	0	0	0	0	0.155861	0	0	0	0	0	0	0	0
BnaA01g06920D	0	0	0	0	0	0	0	0	0	0	0	0	0	0	0	0	0	0	0	0	0	0	0	0	0	0
BnaA01g06930D	0	0	0	0	0	0	0	0	0	0	0	0	0	0	0	0	0	0	0	0	0	0	0	0	0	0
BnaA01g06940D	0.527989	0.555387	0.416283	0	0.528551	0	0.467261	0	0	0.302021	0.51635	0.443893	0	0	0.279537	0.317015	0.930011	0.242719	0.673521	0.253615	0.820213	0.194974	0.648101	1.7372	0.700062	0.739112
BnaA01g06950D	0	0	0.082627	0.082968	0	0	0	0	0.041976	0.291949	0.141047	0.281134	0.087647	0.087917	0.037054	0.042583	0.050772	0.161451	0.083835	0.151044	0	0	0	0	0	0
BnaA01g06960D	0	0	0	0	0	0	0	0	0	0	0	0	0	0	0	0	0	0	0	0	0	0	0	0	0	0
BnaA01g06970D	0.994272	1.25422	1.10202	0.178367	0.092965	0.141528	0.236401	0.417813	0.170329	0.587354	0.23094	0.151164	0.219987	0.282983	0.789804	0.657906	0.585724	0.272984	1.05676	0.851671	0.208723	0.301925	0.181762	2.05077	1.0589	1.55076
BnaA01g06980D	0	0	0	0	0	0	0	0	0	0	0	0	0	0	0	0	0	0	0	0	0	0	0	0	0	0
BnaA01g06990D	4.89673	6.54084	2.9088	2.51026	7.35307	14.5943	10.9536	13.9354	7.37577	3.09543	4.52701	12.2157	12.8925	12.7881	5.01229	4.45566	4.54514	9.91847	11.3378	12.1813	8.09564	7.52362	9.7246	3.0404	8.86497	7.85052
BnaA01g07000D	0	0	0.048187	0	0	0	0	0	0	0	0	0	0.162211	0	0.012664	0	0	0	0.055927	0	0.005961	0	0	0.021365	0.279584	0
BnaA01g07010D	0.883219	0.859399	0.364829	0.23119	0.264684	1.3443	0.818135	1.14282	0.272958	0.680934	0.390889	0.48508	0.946373	0.597773	0.560887	0.405169	0.407885	0.564158	0.90089	0.762454	0.410357	0.418635	0.399932	0.967852	0.981028	0.530987
BnaA01g07020D	0.036533	0	0	0.251209	0.145148	0.036964	0	0	0	0.330942	0.036745	0.098092	0	0.113893	0	0.147105	0	0.090839	0.390364	0.241743	0	0.037054	0.339031	0.433496	0.073448	0.150418
BnaA01g07030D	0	0	0	0	0	0	0	0	0	0	0	0	0	0	0	0	0	0	0	0	0	0	0	0	0	0
BnaA01g07040D	0	0	0	0	0	0	0	0	0	0	0	0	0	0	0	0	0	0	0	0	0	0	0	0	0	0
BnaA01g07050D	2.49072	2.94215	3.74518	3.23579	4.47637	10.8916	11.0773	11.6054	1.20429	1.66651	1.73158	9.33544	5.81892	13.2424	3.4774	1.64793	4.41027	5.74569	3.11993	5.25161	5.72047	3.51983	5.93142	3.97572	5.34942	4.43595
BnaA01g07060D	4.19904	3.81325	2.70236	2.30762	2.92409	6.63019	6.60433	8.7234	4.81414	4.72624	5.51894	6.30712	4.90372	6.25038	3.05812	4.40569	3.1247	6.24248	6.63251	6.35638	3.72467	3.97645	3.97988	5.00515	6.27339	5.04669
BnaA01g07070D	0	0	0	0	0	0.039776	0	0	0	0	0	0.060622	0.094419	0	0	0	0	0	0	0	0	0	0	0	0	0
BnaA01g07080D	0	0	0	0	0	0	0.052126	0	0	0	0.118089	0.058182	0.060212	0	0.054395	0	0	0.117462	0.165983	0	0.230136	0.383421	0.381204	0	0.058522	0.059725
BnaA01g07090D	0.923478	0.587035	0	16.2083	14.9362	6.41265	10.7998	5.9792	10.158	5.23422	7.35504	2.89849	1.65739	4.29904	15.3047	8.06912	7.04345	2.28362	1.06242	3.76015	16.3716	9.30197	12.6769	3.11278	3.4412	4.46188
BnaA01g07100D	0.002591	0	0	0.532085	0.034143	0	0.725067	0.004749	0	0	0	0	0	0	0.238023	0.013026	0.003445	0	0.357398	0	0.048824	0	0.004892	0.015787	0.354904	0.110931
BnaA01g07110D	2.13913	2.70968	2.2526	0.867337	0.681575	0.821036	0.904966	1.20521	1.17112	1.19349	1.40465	1.00826	0.390186	0.468414	1.23019	2.78364	1.19782	0.826966	1.77598	1.79737	1.18914	0.228467	0.972058	2.18917	2.56208	2.72757
BnaA01g07120D	0.428045	0.380949	0.239382	0.41981	0.297318	1.11696	0.58809	1.69785	0.523235	0.531732	0.415744	0.659939	0.39963	0.784945	0.438899	0.537249	0.332677	0.515712	0.787004	0.98836	0.445559	0.247773	0.699462	0.843635	1.16355	0.882326
BnaA01g07130D	0.819053	0.541497	0.660553	0.510148	1.57917	9.57591	5.47174	6.85971	1.75188	0.959887	1.29249	2.52067	2.10443	4.55318	1.58778	3.03868	0.524565	1.26882	1.61658	2.24911	2.92288	3.48552	2.88805	1.59215	1.3321	2.74223
BnaA01g07140D	5.56035	3.98432	5.69768	2.87035	1.83544	14.4532	14.2478	15.5211	11.5292	7.39778	11.0885	6.65576	6.97586	9.01825	9.61387	11.4891	5.49608	2.42855	2.20447	3.21096	10.2235	8.07489	12.0798	2.42361	2.76686	3.3633
BnaA01g07150D	3.09982	4.03861	2.04939	0.939618	0.834414	3.07572	2.17111	2.18076	2.93231	1.90916	1.76458	2.13389	3.03905	3.48792	1.8788	2.38881	2.01545	2.75255	3.26234	4.37069	1.47013	1.16034	0.969388	2.47877	1.77632	3.25771
BnaA01g07160D	0.374841	0.631243	0.684467	1.12692	0.477392	3.12915	2.86853	3.20559	0.369828	0.640544	0.796492	2.08539	1.48535	1.991	0.927475	0.52371	0.222214	2.23469	1.77986	1.51683	1.76332	2.55748	2.3575	1.4258	1.54474	1.34862
BnaA01g07170D	3.94519	4.064	3.16431	2.93482	3.23913	3.44413	2.66176	3.90326	9.43784	7.85502	16.4838	6.79065	7.39896	4.31686	2.91718	4.52689	3.15023	4.43242	5.44235	5.19654	4.40036	3.8363	7.27266	3.54006	2.7879	2.93058
BnaA01g07180D	0.055665	0.120704	0.144865	0	0	0	0.113253	0	0.036515	0.079027	0	0.216562	0.770242	0.149124	0.053617	0.055448	0.104899	0.119384	0	0	0.143327	0	0.039819	0.039444	0	0.037426
BnaA01g07190D	0	0.015175	0.019179	0.184741	0.130299	0.007097	0.255539	0.181279	0	0.140187	0.530353	0.016391	0.044691	0.472277	0.368789	0.007836	0.021309	0.090467	0.262049	0.037052	0.067903	0.440361	0.118994	0.002715	0.013223	0.008411
BnaA01g07200D	0.526924	0.566217	0.96152	0.583619	1.24857	1.67702	1.34243	1.0148	0.425281	0.714587	0.737147	1.2101	0.505522	0.577279	1.06989	0.694265	1.2018	0.926232	1.05135	1.16051	0.414406	0.937153	1.14155	0.765664	0.636575	0.54572
BnaA01g07210D	0	0	0	0	0	0	0	0	0	0	0	0	0	0	0	0	0	0	0	0	0	0	0	0	0	0
BnaA01g07220D	0	0	0	0	0	0	0	0	0	0	0	0	0	0	0	0	0	0	0	0	0	0	0	0	0	0
BnaA01g07230D	0	0	0	0	0	0	0	0	0	0	0	0	0	0	0	0	0	0	0	0	0	0	0	0	0	0
BnaA01g07240D	0.701558	0.60617	2.43777	0.364931	0.280302	4.29361	0.477848	1.83221	0.080393	0	0.130859	0.128518	0.11936	0.108243	0.188574	0.218918	0.085507	0.216073	0	0.174652	0.605781	0.043477	0.053078	0.258175	0.086179	0.17649
BnaA01g07250D	0	0	0	0	0	0	0	0	0	0	0	0	0	0	0	0	0	0	0	0	0	0	0	0	0	0
BnaA01g07260D	0	0	0	0	0	0	0	0	0	0	0	0	0	0	0	0	0	0	0	0	0	0	0	0	0	0
BnaA01g07270D	8.76426	7.54091	6.51733	20.0519	26.6934	25.8698	23.2668	16.6752	36.3033	48.2278	37.0314	45.1824	37.5567	44.912	11.9832	16.1675	11.4434	43.6593	31.6259	42.106	22.1596	15.7181	15.0627	8.78892	9.67645	8.97763
BnaA01g07280D	5.49521	7.75749	6.14893	7.19986	8.82055	18.1123	22.3752	16.3134	7.82896	7.85251	6.99192	12.7794	13.2724	16.0447	11.433	16.4675	7.9272	6.32313	6.32912	8.03926	12.9983	9.41253	15.9604	7.02106	6.09477	6.7098
BnaA01g07290D	3.29554	5.27219	2.7912	3.53652	2.40793	5.68524	11.0072	4.72522	3.53972	3.14068	1.85988	7.07477	11.5057	8.27333	2.86295	4.66897	3.17425	5.61648	6.19249	8.63101	4.00216	5.7348	2.75966	5.06599	4.80599	5.12803
BnaA01g07300D	0	0	0	0	0	0	0.213117	0	0	0	0	0	0	0	0	0	0	0	0	0	0	0	0	0	0	0
BnaA01g07310D	0	0	0	0	0	0.534379	0.138779	0.426502	0	0	0	0	0	0.050384	0	0	0	0.065776	0.067068	0	0	0	0	0	0	0
BnaA01g07320D	0.646166	0.510499	0.431452	0.548756	0.844998	0.930443	1.04674	0.848098	0.209836	0.56724	0.817866	1.27597	1.01308	1.03945	0.291855	0.371859	0.25403	0.594921	0.736157	0.525322	0.349733	0.33919	0.704766	0.513311	0.512371	0.567486
BnaA01g07330D	1.2654	1.09811	1.26805	0.603006	0.906323	0.148523	0.08818	0.226553	0.762575	0.489731	0.399003	2.37263	3.19458	3.23965	0.898065	2.06728	1.16793	0.618527	2.5772	1.95999	0.767363	1.22211	0.804226	0.745918	0.665058	0.848917
BnaA01g07340D	1.81078	1.09518	1.75728	0.785815	0.868974	2.86622	2.18674	2.84692	5.36744	2.74338	2.78899	9.78779	13.4576	10.5573	0.8982	2.61266	0.522566	1.37009	1.34047	2.05165	2.92237	0.906683	1.83304	0.822639	0.407333	0.801014
BnaA01g07350D	5.8221	6.75423	8.691	8.18689	8.62537	30.2556	23.7029	27.7902	7.21447	5.14273	6.08126	10.7914	7.87829	9.83899	9.70036	9.54449	10.4549	11.9898	15.4934	12.3897	17.7548	15.6381	19.6084	11.1404	8.72555	11.9715
BnaA01g07360D	6.22125	8.3919	7.05841	4.5763	4.79974	4.46983	3.37596	4.59114	7.21625	4.65619	3.72206	6.86306	9.19577	10.1967	2.99051	6.1408	4.84654	8.60961	6.05755	6.97494	5.65505	3.79691	4.27821	4.36873	4.59371	5.65277
BnaA01g07370D	0	0	0	0	0	0	0	0	0	0	0	0	0	0	0	0	0	0	0	0	0	0	0	0	0	0
BnaA01g07380D	0	0.095925	0	0	0	0	0	0	0	0	0	0.057409	0.402031	0.80316	0	0	0	0	0	0	0	0	0.09884	0	0	0
BnaA01g07390D	0	0	0	0	0	0	0	0	0	0	0	0	0	0	0	0	0	0	0	0	0	0	0	0	0	0
BnaA01g07400D	0	0	0	0	0	0	0	0	0	0	0	0	0	0	0	0	0	0	0	0	0	0	0	0	0	0
BnaA01g07410D	0	0	0	0	0	0	0	0	0	0	0	0	0	0	0	0	0	0	0	0	0	0	0	0	0	0
BnaA01g07420D	0	0	0	0	0	0	0	0	0	0	0	0	0	0	0	0	0	0	0	0	0	0	0	0	0	0
BnaA01g07430D	3.95759	4.02692	1.90077	1.20473	0.544513	1.49233	1.00987	3.09689	2.02422	3.08	0.992877	8.07803	7.38151	10.5601	1.66512	2.84592	2.27083	3.51792	3.58614	3.26633	0.81629	2.06819	0.770841	2.60116	1.41185	3.09193
BnaA01g07440D	0.422527	0.704682	0.528655	0.82816	0.734871	0.620017	2.02043	1.50537	0.527894	0.654273	0.616777	0.965226	0.949172	1.37156	0.4335	1.06045	0.534151	1.45078	0.717531	0.743813	0.727124	0.813498	0.922647	0.979414	0.897158	0.739359
BnaA01g07450D	10.5116	12.6402	6.03864	3.76744	5.15767	7.28884	4.88359	5.8634	9.25155	10.9264	7.91794	24.1595	35.6009	38.7192	2.87426	4.16896	3.3403	10.8933	7.88531	12.616	2.65741	2.78521	3.15109	9.97557	7.23817	7.43214
BnaA01g07460D	4.96177	5.91273	4.4162	3.04411	3.21317	3.47748	2.79798	5.61943	1.47531	3.10126	1.54047	3.15511	5.32838	5.76016	2.5569	4.2509	3.24102	3.59829	4.60299	5.27517	1.84217	1.9384	2.52404	2.43684	1.92236	2.13443
BnaA01g07470D	4.75197	6.16944	2.89048	1.30121	1.6342	3.15714	1.98955	2.74654	5.52364	4.92152	2.66033	9.53223	11.7089	19.8432	3.09385	2.55105	2.11058	3.93233	6.32949	6.51495	0.694738	2.36336	1.04695	6.58779	8.30946	10.1607
BnaA01g07480D	0	0	0	0	0	0	0	0	0	0.086439	0	0	0	0	0	0	0	0	0	0	0	0	0	0	0	0
BnaA01g07490D	0	0	0	0	0	0.030735	0	0	0	0	0	0	0	0	0	0	0	0	0	0	0	0	0	0	0	0
BnaA01g07500D	0	0	0	0	0	0	0	0	0	0	0	0	0	0	0	0	0	0	0	0	0	0	0	0	0	0
BnaA01g07510D	0	0	0	0	0	0	0	0	0	0	0	0	0	0	0	0	0	0	0	0	0	0	0	0	0	0
BnaA01g07520D	0	0	0	0	0	0	0	0	0	0	0	0	0	0	0	0	0	0	0	0	0	0	0	0	0	0
BnaA01g07530D	0	0	0	0	0	0	0	0	0	0	0	0	0	0.328388	0	0	0	0	0	0.071977	0	0.050775	0	0	0	0
BnaA01g07540D	0	0	0	0	0	8.12914	6.66058	0	0.092453	0.126057	0.52807	0.092585	0.048504	0.0578	0	0	0	0	0.085194	0	0.065332	0	0	0	0	0.295653
BnaA01g07550D	0.738935	1.10135	0.611556	0.214485	0.177521	0	0	0.18429	0	0.248113	0.218428	0.045273	0	0.189568	4.15646	3.08012	3.82064	2.8946	2.27588	1.83415	0.218028	0.730341	0.368779	1.07637	0.769611	0.463538
BnaA01g07560D	0	0	0	0	0	0	0.147216	0	0.426993	0	0.092262	0.143507	0	0	0	0	0	0	0	0	0	0	0	0	0	0
BnaA01g07570D	0	0	0	0	0	0	0	0	0	0	0	0	0	0	0	0	0	0	0	0	0	0	0	0	0	0
BnaA01g07580D	0	0	0	0	0	0.146013	0	0	0	0	0	0	0	0	0	0	0	0	0	0.146872	0	0	0	0	0	0
BnaA01g07590D	0	0	0	0	0	0	0	0	0	0	0	0	0	0	0	0	0	0	0	0	0	0	0.131872	0	0	0
BnaA01g07600D	0.269872	0.146922	0.364768	0.27978	0.165001	0.234685	0.382329	0.348611	0.078179	0.365469	0.332421	0.101528	0	0.478782	0.053875	0.195981	0.211593	0.291012	0.542421	0.237573	0.347329	0.269081	0.120979	0.245831	0.284975	0.579739
BnaA01g07610D	14.8907	16.0328	14.6097	13.2053	12.7371	7.18853	8.03858	7.61383	10.6359	11.9891	11.7877	6.36381	5.08306	8.07825	14.7912	11.6944	17.5234	21.7085	17.8434	17.9396	10.3229	11.9314	6.19515	19.5192	17.6348	17.8361
BnaA01g07620D	0	0	0	0	0	0	0	0	0	0	0	0	0	0	0	0	0	0	0	0	0	0	0	0	0	0
BnaA01g07630D	0	0	0	0.207253	0	0	0.009131	0	0	0	0	0	0	0	0	0.026431	0	0.040841	0.027229	0	0	0	0.022427	0.065469	0.019561	0.125193
BnaA01g07640D	0.036792	0.168986	0.312216	0.666685	1.05225	0.300297	1.80717	0.384122	1.07579	1.28184	0.693032	1.20365	1.04514	0.455662	0.519577	0.278532	0.260141	0.105008	0.601137	0.108546	0.93766	1.06256	1.95441	0.003474	0.182362	0.455786
BnaA01g07650D	0	0	0	0.054254	0.028783	0	0	0	0	0	0	0	0	0.027507	0	0.027046	0.027871	0	0.066529	0	0	0	0.021917	0.07278	0	0.082362
BnaA01g07660D	0.021901	0.221056	0.04399	0.36441	0.135996	0.183964	0.165588	0.090631	0.456601	0.27456	0.656552	0.109372	0.220472	0.354654	0.211287	0.384591	0.075818	0.279902	0.104808	0.044232	0.254166	0.040337	0.21274	0.411558	0.204716	0.221308
BnaA01g07670D	0.931956	0.281397	0.580605	0	0.07169	0	0.065826	0	0.192436	0.121815	0.339216	0	0	0.187459	0.220174	0.145069	0.195194	0.526842	0.102154	0.324403	0	0	0.066071	0.250313	0.133737	0.311928
BnaA01g07680D	0	0.972806	0.447229	0.151928	0	0	0	0.308766	0.154745	0.408414	0.157392	0	0	0.161221	0.6703	0.290533	0.295262	0.156511	0	0.121697	0	0	0	0.259613	0.733529	0
BnaA01g07690D	0	0	0	0	0.082098	0.074718	0	4.33859	0	0.210624	0	7.02276	2.40259	0	1.07151	0	0.041703	0.090499	0	0	5.93379	5.56971	0	0	13.1964	0.484618
BnaA01g07700D	0	0	0	0	0	0	0	0	0	0	0	0	0	0	0	0	0	0	0	0	0	0	0	0	0	0
BnaA01g07710D	0	0	0	0	0	0	0	0	0	0	0	0	0	0	0	0	0	0	0	0	0	0	0	0	0	0
BnaA01g07720D	1.11996	1.51724	0.663003	1.4724	1.53134	5.65215	4.1142	5.39535	0.780503	0.920763	0.765871	0.349536	0.174358	0.495149	0.937216	1.05112	0.837955	0.229247	1.78125	0.200777	1.68948	0.63774	0.704306	1.76165	3.35332	3.16002
BnaA01g07730D	0	0	0	0	0	0.152138	0.0515	0.152073	0	0	0	0	0	0	0	0	0	0	0	0	0	0.05095	0	0	0	0
BnaA01g07740D	0	0	0	0	0	0	0	0	0	0	0	0	0	0	0	0	0	0	0	0	0	0	0	0	0	0
BnaA01g07750D	11.3974	13.2406	9.31312	4.34424	4.60119	10.4155	10.4759	10.0245	7.00506	9.2116	6.11512	3.37463	4.35744	4.38166	5.10535	4.20702	5.04285	8.30121	7.06666	7.53419	4.70328	4.45257	3.7495	9.89392	9.09539	10.3789
BnaA01g07760D	0	0	0	0	0	0	0	0	0	0	0	0	0	0	0	0	0	0	0	0	0	0	0	0	0	0
BnaA01g07770D	0	0	0	0	0	0	0	0	0	0	0	0	0	0	0	0	0	0	0	0	0	0	0.037517	0	0	0
BnaA01g07780D	0	0	0	0	0	0	0	0	0	0	0.088504	0.093129	0.048188	0	0	0	0	0	0	0	0	0	0.047033	0	0	0
BnaA01g07790D	3.85656	0	3.69239	2.81275	0.163134	5.49741	5.20468	5.20638	4.63116	7.16719	0.016592	0	0	7.79679	2.61255	2.39705	2.82924	5.10202	5.79034	0	0.04679	4.91812	0	5.34821	4.48272	5.10491
BnaA01g07800D	0	0	0	0	0	0	0	0.016428	0.009051	0	0	0.004558	0.001449	0	0	0	0	0.011502	0	0.009457	0	0.012856	0	0	0.019161	0
BnaA01g07810D	0.548109	0.491286	0.489338	0.450436	0.139617	0	0	0	0.537831	0.945279	0.611265	0	0	0	0.534656	0.184331	0.325569	0.171466	0.758521	0	0.487726	0.279052	0.319691	2.89506	0.691411	1.02737
BnaA01g07820D	0	0	0	0	0	0	0	0	0	0	0	0	0	0	0	0	0	0	0	0	0	0	0	0	0	0
BnaA01g07830D	0	0	0	0	0	0	0	0	0	0	0	0	0	0	0	0	0	0	0	3.88388	0	0	0	0	0	0
BnaA01g07840D	0.033522	0.031272	0	0.03282	0	0	0	0	0.100555	0.156397	0.132012	0.156606	0	0.171882	0.022342	0	0.033889	0.062251	0.031341	0	0	0	0	0	0	0
BnaA01g07850D	0.034627	0	0	0	0	0	0	0	0.162886	0.151865	0.125386	0.472773	0.449012	0.609531	0	0.09874	0.045158	0.099283	0.326324	0.063661	0	0.04734	0.2271	0	0	0
BnaA01g07860D	18.4181	21.4249	18.2438	14.8664	16.6926	56.1227	42.0276	48.9911	23.7413	19.6966	17.8585	45.6187	53.2022	53.9836	18.4457	21.138	18.5523	26.6126	29.4913	29.0574	32.8984	24.8537	27.9666	20.6483	20.2177	22.0108
BnaA01g07870D	0	0	0	0	0	0	0	0	0	0	0	0	0	0	0	0	0	0	0	0	0	0	0	0	0	0
BnaA01g07880D	0	0	0	0	0	0	0	0	0	0	0	0	0	0	0	0	0	0	0	0	0	0	0	0	0	0
BnaA01g07890D	0	0	0	0	0	0.149816	0.103179	0	0	0	0	0.084199	0	0	0	0	0	0	0	0	0	0	0	0	0	0
BnaA01g07900D	0	0	0	0	0.158172	0.797947	0.919419	0.523659	0	0.173541	0	0	0	0	0	0	0.142506	0	0	0	0.371117	0.144884	0.236262	0.273208	41.6269	0.564223
BnaA01g07910D	5.62035	6.58665	5.67124	11.243	11.1261	158.623	138.603	123.759	5.22884	4.26093	3.863	26.6993	19.0265	39.4354	13.3392	14.1709	13.5438	32.7701	21.5653	31.8874	77.4986	50.0441	113.934	16.8398	17.9709	20.2863
BnaA01g07920D	0.564291	0.695834	0.679645	1.85633	2.52674	2.71905	3.0512	2.90565	2.00828	1.94955	1.72224	3.18672	4.06806	2.69297	0.398584	0.755724	0.542305	1.37903	2.17286	1.55188	2.32812	3.72865	3.04327	1.52119	1.64051	1.67633
BnaA01g07930D	2.88656	1.94602	2.35073	1.61233	2.1875	2.62476	2.8777	3.77732	3.19393	3.97012	3.32147	10.4895	10.8925	9.49066	1.77517	2.24354	1.82901	4.67247	5.05089	5.43752	2.55338	2.28655	2.71962	3.43469	5.73696	4.66244
BnaA01g07940D	3.33794	3.06209	3.84006	4.64223	5.04966	9.03975	10.19	6.69789	4.73576	4.48205	3.58585	6.11371	5.43242	6.83461	3.40466	2.84029	2.44144	6.04187	5.62233	6.40313	10.0467	8.17626	11.4665	3.68146	4.35724	3.52221
BnaA01g07950D	0	0.148903	0.44303	0.049603	0.049556	0.043428	0.146336	0.07652	0	0.400772	0.205538	0	0	0	0.049146	0.050324	0.253698	0.04347	0.150114	0.047439	0	0.051216	0	0.100985	0.05076	0.103781
BnaA01g07960D	0.537262	0.422192	0.265577	0.032358	0.074947	0.537218	0.191503	0.539959	0.104739	0.026432	0.170548	0.079115	0.081099	0.068554	0.268426	0.429038	0.212959	0.144948	0.224332	0.119057	0.337643	0.159608	0.063795	0.356322	0.374277	0.371888
BnaA01g07970D	0.095572	0	0	0	0	0.130861	0	0.334303	0.164643	0.143651	0.155401	0.181615	0.086088	0.411738	0	0	0	0.055918	0	0	0.101082	0	0.235253	0	0.046877	0
BnaA01g07980D	2.49315	2.73122	2.43153	1.58846	4.02513	5.14991	3.249	3.80853	3.23943	3.33213	1.99835	3.03781	3.19335	3.25038	2.01579	2.28767	2.14089	4.05973	4.61993	3.5817	3.96434	3.87004	2.33898	3.64738	3.56306	3.73317
BnaA01g07990D	0	0	0	0	0	0	0	0	0	0	0	0	0	0	0	0	0	0	0	0	0	0	0	0	0	0
BnaA01g08000D	3.48818	4.10513	3.06811	3.23906	2.54043	10.2095	6.72049	7.48142	3.79601	3.11666	2.54814	4.25046	4.10395	5.61742	3.91033	3.82691	3.99271	7.21976	5.93357	7.05384	6.04136	6.42434	8.59215	5.51678	4.67957	3.29576
BnaA01g08010D	0.436855	0.158457	0.061295	0.089453	0.394537	0.046691	0	0.02331	0.045029	0.391526	0.203646	3.41373	5.97905	2.2916	0.179505	0.220192	0.22904	0.474229	0.182914	0.399607	0.179668	0.276152	0.064595	0.063371	0	0
BnaA01g08020D	0.772407	1.18485	0.49308	1.48721	1.00887	2.84554	2.20371	3.27896	2.09004	1.49714	3.52853	1.66888	1.53653	1.59304	1.55953	2.70097	1.571	1.04407	1.99315	1.97431	2.49424	2.4458	4.71211	1.05201	1.30314	1.75664
BnaA01g08030D	0	0	0	0	0	0	0	0	0	0	0	0	0.068317	0	0	0	0	0	0	0	0	0	0	0	0	0
BnaA01g08040D	0	0.104178	0	0	0	0	0	0	0	0	0.051746	0	0	0	0	0	0	0.191031	0.0557	0.177713	0	0.131506	0	0	0	0
BnaA01g08050D	0	0.05463	0.180278	0	0	0	0	0	0	0	0	0	0	0	0.11913	0	0	0	0	0	0	0	0	0	0.092776	0
BnaA01g08060D	0.071662	0.294268	0.100802	0	0.008008	0.035312	0	0.736946	0	0.0173	1.18645	0	0	0.296854	0	0	0	0	0	0.797077	0.009705	0	0	0.092678	0	0.014119
BnaA01g08070D	0.072953	0	0	0	0	0	0	0	0	0	0	0.055457	0.032677	0	0	0	0	0	0.051165	0	0	0	0	0	0	0
BnaA01g08080D	0	0	0	0	0	0	0	0	0.126205	0	0	0.14363	0	0	0	0	0	0	0	0	0	0.064499	0	0	0.060088	0
BnaA01g08090D	0	0	0.028324	0	0	0	0	0	0	0	0	0	0	0	0.032481	0	0	0	0	0	0	0	0	0	0	0
BnaA01g08100D	0	0	0	0	0	0	0	0	0	0	0	0	0	0	0	0	0	0	0	0	0	0	0	0	0	0
BnaA01g08110D	0	0	0	0	0	0	0	0	0.145788	0	0	0	0	0	0	0	0	0	0	0	0.102746	0	0	0	0	0
BnaA01g08120D	26.3523	35.2561	26.3753	2.93905	2.0907	0.637436	0.22835	0.691348	8.67271	9.89444	6.37544	1.50957	0.477743	1.36192	16.1536	20.7082	14.9147	3.8445	4.60507	3.38576	1.69548	1.82695	0.563967	13.5385	9.68409	8.4614
BnaA01g08130D	7.42101	8.18479	7.12308	8.55158	9.48863	17.348	12.8334	13.2047	6.98302	7.13634	6.02828	10.5149	9.45568	12.1147	9.98494	10.3153	10.647	13.9439	11.4237	11.8464	12.4574	14.4145	16.2689	6.97179	9.49105	10.8584
BnaA01g08140D	1.8207	1.48774	1.85273	0.463101	0.763972	0.589699	0.755935	0.791424	1.65257	0.989662	1.78252	1.73206	2.64288	1.62896	1.86608	0.9261	0.922939	1.15298	1.57326	2.11435	1.71605	0.524053	1.71652	1.12016	1.00045	1.94185
BnaA01g08150D	204.428	232.085	228.372	256.337	240.483	74.645	92.7792	139.005	139.064	138.823	164.092	32.099	30.3393	34.0387	267.887	293.623	347.75	69.5232	107.05	73.0291	236.617	200.281	204.898	148.762	133.691	101.182
BnaA01g08160D	19.122	21.3365	25.0764	16.0468	14.1914	21.639	24.8227	18.9354	13.7043	17.615	13.2534	16.4301	19.0071	16.5048	18.6404	11.1418	16.6587	10.5551	11.1103	12.7896	18.2079	7.7212	10.2641	19.6972	16.4466	16.6078
BnaA01g08170D	0	0	0	0.831896	0.033157	0.187121	0.024381	0.110257	0.036384	0	0.084106	0.053066	0	0.063256	0	0	0	0	0	0.085894	0.281344	0.165487	0.188031	0.036663	0	0.054736
BnaA01g08180D	0	0	0	0	0	0	0	0	0	0	0	0	0	0	0	0	0	0	0	0	0	0	0	0	0	0
BnaA01g08190D	0	0	0	0	0	0	0	0	0	0	0	0	0.212946	0	0	0	0	0	0	0	0	0	0	0	0	0
BnaA01g08200D	6.68574	5.89408	7.0708	6.13128	6.11449	4.92485	6.28888	5.51095	5.88447	7.12243	7.28985	1.88727	2.23855	2.42231	6.91338	7.20883	6.31816	3.70801	4.06966	3.87526	7.39658	6.3976	8.39913	5.11859	4.32337	4.09493
BnaA01g08210D	0.107976	0.964208	0.694221	1.2347	1.70773	3.81193	1.96409	3.40894	0.325072	0.545197	0.166119	0.601012	0.113568	1.1312	0.630549	1.36183	1.02838	1.61473	2.39421	1.21774	0.6884	0.66416	1.31128	1.77802	0.990484	0.721492
BnaA01g08220D	0	0	0	0.049976	0	0	0	0	0	0	0	0	0	0	0	0	0	0	0	0	0	0	0	0	0	0
BnaA01g08230D	0	0	0	0	0	0	0	0	0	0	0	0	0	0	0	0	0	0	0	0	0	0	0	0	0	0
BnaA01g08240D	0	1.633	1.15729	0.091335	0	0	0	0	0	0.216622	0.417594	0.008174	0.004103	0	0.171957	0	0.251188	0	0	0.475852	0.305784	0.139481	0	0	0	0
BnaA01g08250D	0	0.030062	0	0.03076	0	0	0.062282	0	0.03091	0	0.09026	0.031086	0.032495	0	0	0	0	0	0	0	0	0	0	0.060536	0	0
BnaA01g08260D	50.9201	62.2539	52.1522	31.9105	30.2526	10.117	16.0845	10.4204	33.2648	39.2616	29.0849	11.0154	13.4778	13.1997	29.5711	22.1588	29.8924	20.8753	18.7735	19.8231	16.1042	13.2599	9.10117	36.6816	32.1294	35.5823
BnaA01g08270D	0	0	0	0	0	0.017755	0	0.011403	0	0	0	0	0	0	0.001155	0.05667	0	0.000443	0	0	0	0	0	0	0	0.001807
BnaA01g08280D	3.52553	2.85533	4.53676	3.28816	2.68973	6.27542	7.29633	5.01812	2.07253	2.21344	2.14667	3.69311	3.93489	3.77556	1.53885	2.33678	3.77177	2.99026	4.06997	3.26746	2.51314	3.39545	3.41435	4.71264	4.89931	4.16245
BnaA01g08290D	0.706059	0.846418	1.18301	0.435943	0.521259	0.650474	1.15034	1.38203	0.601686	0.879228	0.575743	0.416951	0.276722	0.304084	0.816267	0.485163	0.214122	0.5242	1.24457	0.87723	0.652444	0.98013	0.511506	1.41203	1.30856	0.923915
BnaA01g08300D	2.87331	1.77981	2.73404	3.23342	2.73536	3.34294	3.50035	3.5289	3.52333	3.62835	5.03102	3.74152	4.79567	4.60112	3.09836	1.8165	2.56531	4.07522	3.24444	3.72129	2.95814	3.35225	2.81057	2.66959	2.41592	3.05
BnaA01g08310D	3.48392	3.69096	2.85676	2.29144	2.47318	3.79105	4.37384	4.02163	6.14661	8.3143	4.88833	6.13496	6.0655	5.38017	3.29266	2.89759	2.64218	5.12879	4.98181	5.16633	3.19108	3.89712	4.35765	3.92656	3.36616	3.97418
BnaA01g08320D	0.107066	0	0.021311	0.085739	0	0.022078	0.131095	0	0.185348	0.949126	0.139593	0.101041	0.070799	0.255174	0	0.22493	0	0.55781	0.442978	0.725067	0	0.057691	0	0.09295	0	0.222659
BnaA01g08330D	0.063262	0.038134	0.060836	0.047311	0.089197	0.829204	0.176881	0.184113	0.042818	0.426564	0	0.10586	0.050336	0.067404	0.094571	0.042784	0.127401	0.101458	0.037746	0.289198	0.113063	0.089439	0.149417	0.051339	0	0.10958
BnaA01g08340D	0	0	0.223745	0	0	0	0	0.105528	0	0	0.049631	0	0	0	0.056042	0	0	0.39234	0.250997	0.31611	0	0	0	0.049729	0	0.106233
BnaA01g08350D	0.386705	0.101747	0.049145	0.141633	0.333896	0.819032	0.686685	0.051532	1.05036	0.272281	0.942899	1.01251	0.200649	0.777676	0.151176	0.221645	0.275007	0.265815	0.129783	0.962557	0.297843	0.257638	0.82987	0.754632	0.778814	0.192875
BnaA01g08360D	1.3702	0.942009	0.989551	0.804159	0.630218	0.316277	0.230138	0.243303	0.898306	1.01993	0.585557	0.484994	3.76659	4.20451	0.585453	0.823677	0.582875	1.54134	1.14615	0.596466	0.259315	0.625328	0.53088	1.04629	0.263464	0.000101
BnaA01g08370D	0.82529	0.720067	0.822054	0.594759	0.694438	2.39614	2.21616	4.39178	0.410781	1.11885	1.16875	0.490007	0.616053	0.192729	0.483211	1.03977	1.30699	0.47907	1.27596	0.564369	0.802386	0.732812	1.19345	1.84662	1.88113	2.67359
BnaA01g08380D	3.66249	2.11344	2.70872	11.0047	10.3985	10.6681	14.0461	6.44681	6.76625	7.38495	12.8816	19.9816	13.8219	19.6871	8.67649	12.122	7.38349	11.4722	7.00635	9.79703	34.5137	23.2541	45.0089	1.34368	2.65823	3.34865
BnaA01g08390D	1.34749	0	2.76373	7.84836	5.13673	5.12607	6.05648	3.82796	4.8605	6.37037	5.527	10.5123	5.1544	10.6282	5.27215	6.33563	5.52545	4.75593	5.17823	6.13013	13.6993	10.8761	20.0202	1.83808	1.58196	2.69028
BnaA01g08400D	0	0	0	5.38821	3.58579	3.09111	2.65573	2.64172	0	0	3.79566	8.04918	4.34682	4.77644	2.95809	3.07254	0	1.25144	0	2.6658	7.56845	8.76159	3.39288	0	0	0
BnaA01g08410D	2.8167	1.63731	1.79618	0	0	5.56205	8.82785	3.34701	0.13137	0.018178	2.80747	0	2.30211	10.5645	2.39339	4.2414	0.086795	8.28673	5.77906	5.30654	16.4916	4.97198	38.7232	1.60279	3.08738	3.23686
BnaA01g08420D	0	0	0	0	0	0	0	0	0	0	0	0	0	0	0.315746	0	0	0	0	0	0	0	1.57228	0	0	0
BnaA01g08430D	0	0	0	0	0	0	0	0	0	0	0	0	0	0	0	0	0	0	0	0	0	0	0	0	0	0
BnaA01g08440D	5.54577	5.27243	4.98718	3.68917	3.75604	10.0951	8.02994	7.48311	4.50883	5.28282	4.77407	10.3951	11.0265	12.5255	3.60016	4.37165	3.81671	7.86737	7.84948	8.68907	6.16588	4.57529	6.01966	5.46045	4.32278	4.5578
BnaA01g08450D	6.96727	9.92458	6.88656	6.35032	5.03757	11.396	7.04486	8.44233	6.47796	8.49406	5.41877	9.63709	9.30957	11.4233	5.76007	3.6528	4.05455	8.17274	8.21798	7.23724	7.19597	7.56501	7.31145	9.48474	10.238	6.77037
BnaA01g08460D	0.45677	0.126685	0.2154	0.04239	0.060213	0.246076	0.181873	0.168745	0.127727	0.110274	0	0	0.055098	0	0.276499	0.152041	0.405071	0.032685	0.294924	0.15186	0.141514	0.045452	0.06562	0.181635	0.128397	0.116578
BnaA01g08470D	0	0	0	0	0	0	0	0	0	0	0	0	0	0	0	0	0	0	0	0	0	0	0	0	0	0
BnaA01g08480D	3.51694	3.05807	3.20186	1.91561	1.2043	1.72246	1.27938	2.01755	2.72771	1.86252	1.77962	2.57164	1.57378	2.74851	1.54723	1.58276	1.41029	2.45185	2.47868	3.02169	2.86588	2.38336	2.91015	2.01908	2.01244	1.87677
BnaA01g08490D	0.156267	0.091666	0.115945	0.019309	0	0	0	0	0.098696	0.049093	0.03524	0	0.010165	0	0.14259	0.019787	0.11516	0	0.014609	0	0.016706	0.033911	0	0.050413	0.019693	0.133032
BnaA01g08500D	0.5625	0.713467	0.54208	0.078153	0.21293	0.037692	0.178519	0.218705	0.389845	0.560257	0.314195	2.82667	3.71018	3.11495	0.253623	0.208267	0.112918	0.546326	0.66311	0.652354	0.184377	0.118604	0.095549	0.564419	0.290995	0.36
BnaA01g08510D	1.12891	0.553207	0.302966	3.78345	1.60202	0.494167	2.55527	0	24.5065	10.803	22.6011	25.8133	30.0408	6.42771	0.236411	1.26463	0.863994	1.38681	0.707377	0.279196	0.653996	0	0	0.784411	0.544505	0.187718
BnaA01g08520D	1.34324	0.956737	1.09367	0.733554	0.336461	1.00834	0.879218	1.27067	0.887872	0.75438	0.610058	1.30466	1.96735	1.53335	0.773436	0.947638	0.723127	0.970948	1.2561	1.12325	0.399881	0.342538	0.2719	1.49455	1.6039	1.3242
BnaA01g08530D	8.60083	8.9558	8.12436	11.1014	10.1596	22.8907	21.5294	17.806	12.5769	11.3772	10.131	19.7883	16.4286	17.8335	8.59217	10.7814	9.63324	17.9265	13.0113	16.7227	16.8845	14.725	19.8998	12.9939	12.5433	14.3111
BnaA01g08540D	2.90566	4.48743	3.26363	4.09075	6.07146	13.467	13.1008	10.9917	3.51811	5.25316	3.51076	13.2912	13.6488	15.7575	2.92978	2.93606	2.77076	5.59876	3.34653	5.29623	5.97616	4.43448	5.74701	6.0175	5.176	5.32502
BnaA01g08550D	9.76483	13.2275	5.77262	0.571989	1.52831	0.609369	2.11023	0.395365	5.85542	5.26419	5.25148	30.4104	70.0119	21.9162	3.17181	5.85435	5.08262	4.09145	4.82503	4.23983	2.03467	1.27719	2.97131	3.02454	1.90709	2.96479
BnaA01g08560D	15.9766	14.8762	18.5921	9.52656	12.0829	14.4604	11.8988	11.3277	15.3011	14.5818	18.2758	21.3504	14.1189	17.4928	10.1672	11.4417	8.77803	13.6514	11.8226	11.7183	11.1848	9.23775	12.1288	14.0026	11.6903	15.9356
BnaA01g08570D	0	0	0	0	0	0	0	0	0	0	0	0	0	0	0	0	0	0	0	0	0	0	0	0	0	0
BnaA01g08580D	0	0	0	0	0	0	0	0	0	0	0	0	0	0	0	0	0	0	0	0	0	0	0	0	0	0
BnaA01g08590D	0	0	0	0	0	0	0	0	0	0	0	0	0	0	0	0	0	0	0	0	0	0	0	0	0	0
BnaA01g08600D	0	0	0	0	0	0	0	0	0	0	0	0	0	0	0	0	0	0	0	0	0	0	0	0	0	0
BnaA01g08610D	0	0.226588	0.564314	0.192545	0.250919	0.652975	0.777849	0.430002	0.425222	0.280922	0.115143	2.75883	2.24176	1.21082	0.647392	0.145948	0.499741	1.1165	1.50595	0.478725	0.171331	0.346993	0.284597	0.929077	0.706019	1.13358
BnaA01g08620D	0.105797	0.140538	0.132143	0.680899	0.493137	0.669314	0.263505	0.136777	0.048165	0.295688	0.740547	0.507475	0.465327	0.449425	0.259254	0.339297	0.260925	0.108427	0.185709	0.137838	0.123703	0.118784	0.211527	0.282455	0.088539	0.142984
BnaA01g08630D	4.46649	6.21795	4.63958	10.3071	8.59671	6.81351	5.06205	6.97881	6.7523	9.3402	5.77036	9.03014	9.74187	6.52416	4.00261	3.54363	4.97599	9.95595	11.6198	10.3476	2.90795	5.83795	3.53099	18.5438	16.0935	14.9966
BnaA01g08640D	3.48639	2.56353	2.95233	7.04137	5.17071	3.56499	4.43378	3.33134	3.17752	3.53819	3.82574	2.67808	3.18645	4.45425	3.6096	2.54173	2.95868	5.75177	5.28406	5.75587	5.33327	4.56207	4.75494	5.32684	6.79843	4.75003
BnaA01g08650D	1.64857	0.171944	0.15376	0.093348	0.601719	0.143508	0.990741	1.05316	0	0	0.061581	0.920417	0.218321	0	0.698962	0.467836	0.522696	0.214627	0.280627	0.217253	0.397594	0.382183	0.283483	0.490713	0.248556	0.894942
BnaA01g08660D	0	0	0.135566	0	0	0	0	0	0	0	0	0	0	0	0	0	0	0	0	0	0	0	0	0	0	0
BnaA01g08670D	0	0	0	0	0	0	0	0	0	0	0	0	0	0	0	0	0	0	0	0	0	0	0	0	0	0
BnaA01g08680D	2.61895	3.51829	2.83301	3.14245	2.65206	5.48389	5.0723	5.06749	2.77267	2.48918	3.05972	3.16151	2.05169	4.07103	3.43035	3.28577	3.7286	2.61441	3.56444	3.51792	6.64432	5.07594	8.40233	4.24816	3.13393	4.25019
BnaA01g08690D	0.129916	0	0.064517	0.024659	0	0	0	0	0	0.066171	0.009635	0.06602	0	0	0	0.050983	0.028588	0	0	0	0.002627	0.247015	0.258065	0	0	0
BnaA01g08700D	2.80916	0	2.37538	0	0	0	0	0	0	2.38547	1.70339	0.59765	0	0	2.72242	2.97477	2.53901	0	4.37646	4.72331	0	2.11799	3.29927	3.17284	0	2.5864
BnaA01g08710D	2.61692	1.10859	2.13136	9.64974	7.92764	27.595	31.0566	26.0909	4.69971	2.48009	3.32223	12.5606	14.4538	19.9934	2.99863	3.37247	4.12365	16.5706	13.8434	21.9372	20.2008	21.7598	30.8853	4.28433	5.15717	5.01524
BnaA01g08720D	0	0	0	0	0	0	0	0	0	0	0	0	0	0	0	0	0	0	0	0	0	0	0	0	0	0
BnaA01g08730D	0	0	0	0	0	0	0	0	0	0	0.025704	0	0	0	0.015645	0	0	0	0	0	0	0	0	0	0	0
BnaA01g08740D	0	0.104419	0	0	0	0	0.114644	0	0	0	0	0	0	0	0	0	0	0	0	0	0	0	0	0	0	0
BnaA01g08750D	0	0	0	0	0	0	0	0	0	0	0	0	0	0	0	0	0	0	0	0	0	0	0	0	0	0
BnaA01g08760D	0.41706	0.415395	0.521774	0.140311	0.288634	0.397146	0.283057	0.247733	0.48133	0.434948	0.235264	1.33815	0.743724	1.10066	0.339607	0.26019	0.376875	0.994123	1.45638	1.33412	0.379618	0.230165	0.290275	0.416002	0.776826	0.883928
BnaA01g08770D	1.0765	1.3397	1.05122	2.50577	1.79105	4.77637	5.72429	3.1431	1.62971	1.1543	1.02912	7.57046	7.96432	6.49617	1.31524	1.17485	1.77056	1.03463	1.57838	1.45084	4.97594	4.64689	7.04234	1.67953	1.39402	2.1531
BnaA01g08780D	0.561504	0.409675	0.51158	0.185163	0.203613	0.347959	0.128619	0.353771	0.222585	0.125667	0.323525	0.334064	0.053683	1.14873	0.66881	0.379501	0.668741	0.443069	0.506399	0.165751	0.673303	0.468087	0.355816	0.742835	0.643815	1.05226
BnaA01g08790D	0	0	0	0.065516	0	0	0	0	0	0	0	0	0	0	0	0	0	0	0	0	0	0	0	0	0	0
BnaA01g08800D	0	0	0	0	0	0	0	0	0	0	0	0	0	0	0	0	0	0	0	0	0	0	0	0	0	0
BnaA01g08810D	0.467243	0.583061	0.700165	0.235104	0.331323	0.766634	1.78098	1.74217	0.510104	0.712516	0.224795	0.837047	1.10743	0.958844	0.378588	0.86638	0.51	0.222359	0.584879	0.846118	0.280294	0.420952	0.255102	1.23125	1.07807	1.52923
BnaA01g08820D	1.94633	1.79895	2.19151	1.44508	1.01076	4.66078	3.91324	3.95807	1.50356	1.37022	0.976457	2.66802	3.12665	3.93133	1.78818	1.96325	1.8163	3.3138	3.14381	3.58261	1.79834	2.98343	2.34797	4.08997	2.88414	2.98155
BnaA01g08830D	0	0	0	0	0	0	0	0	0	0	0	0	0	0.20524	0	0	0	0	0	0	0	0	0	0	0	0
BnaA01g08840D	0	0	0	0	0	0	0	0	0	0	0	0	0	0	0	0	0	0	0	0	0	0	0	0	0	0
BnaA01g08850D	3.1779	3.98157	2.78523	1.4515	1.36778	1.18557	1.43898	1.21047	2.33469	3.02743	1.29114	0.715062	0.947445	0.714803	1.41789	1.49503	0.980653	2.42109	2.69939	2.81367	1.51969	1.97293	1.57981	3.32212	3.27672	3.62869
BnaA01g08860D	2.2013	1.73062	2.18245	1.24557	2.01462	0.84233	2.22073	2.14613	14.0843	14.0856	23.1582	9.76295	9.09593	4.46699	6.27185	6.11682	2.52777	2.12751	1.5975	1.9432	1.78317	1.54144	2.15132	2.01651	0.315382	0.969987
BnaA01g08870D	0.319844	0.486301	0.646079	0.182717	0.411257	0.02251	0.766867	0.74454	3.25703	2.6451	3.95198	2.1568	3.06839	1.30875	1.28163	1.8514	0.628716	0.893576	0.218882	0.155697	0.297633	0.514547	0.418724	1.20969	0.356197	0.368316
BnaA01g08880D	0.064994	0.030057	0.04084	0.154734	0	0.121537	0	0.038744	0.223086	0.320899	0.622201	0.31737	0.304444	0.280675	0.084822	0.191294	0.229504	0.060019	0.164553	0	0.053698	0	0.446945	0.047306	0	0
BnaA01g08890D	0	0	0	0	0	0	0	0	0	0.676068	0	0	0	0	0	0	0	0	0	0	0	0	0	0	0	0
BnaA01g08900D	0.076362	0.734143	0.111682	0.023513	0.028411	0.551419	0.133691	0	0.962211	1.12857	1.00845	0.271411	0.143092	0.000978	0.083977	0.061394	0.374808	0.017617	0.311959	0.035028	0.003635	0.080465	0	0.06282	0.026153	0.107393
BnaA01g08910D	8.21348	8.78833	7.9469	7.24121	10.4378	17.019	18.449	15.3051	11.0429	9.96462	8.18113	13.3682	13.313	11.6544	6.75754	7.13711	6.04184	10.128	12.6289	9.81251	11.566	9.09316	10.9251	9.72431	9.26271	11.8376
BnaA01g08920D	3.37244	6.34631	1.94698	1.56025	3.34098	2.18438	2.52694	3.26744	3.54225	6.08557	3.25085	18.9973	31.3484	25.3658	2.89249	3.00247	3.19065	4.94932	5.99294	4.74694	1.37793	2.62272	1.71853	3.43364	3.11467	5.22942
BnaA01g08930D	0	0	0	0	0	0	0	0	0	0	0	0	0	0	0	0	0	0	0	0	0	0	0	0	0	0
BnaA01g08940D	6.05635	5.48155	5.04577	3.24442	2.45353	1.67649	2.89329	2.9933	7.76303	11.1029	4.59478	3.54982	3.20042	2.45059	2.55078	2.32337	2.77954	5.84686	6.03972	6.01733	2.41532	3.56846	2.70146	6.40101	5.82625	6.13991
BnaA01g08950D	0.012213	0	0.000738	0.05324	0.02618	0.118064	0.056538	0.142086	0.001326	0.00346	0.008934	0.0373	0.014464	0.02851	0.029413	0.018923	0.009683	0.017753	0.048923	0.042108	0.07679	0.049237	0.094162	0.032541	0.023724	0.012598
BnaA01g08960D	0	0.107024	0.102759	0.256951	0.24353	0.376759	0.212872	0.45514	0	0.043914	0	1.05283	1.02662	0.8138	0	0.21389	0.185869	0.385357	0.278174	0.374254	0.201466	0.399742	0.341195	0.122969	0.298933	0.045125
BnaA01g08970D	0	0	0	0	0	0	0	0	0	0	0	0	0	0	0	0	0	0	0	0	0	0	0	0	0	0
BnaA01g08980D	0	0	0	0	0	0	0	0	0	0	0	0	0	0	0	0	0	0	0	0	0	0	0	0	0	0
BnaA01g08990D	0.616929	1.22445	0.819676	0.427822	0.344244	0.299221	0.150932	0.201413	0.54924	0.12792	0.250685	0.224102	0.4808	0.298523	0.386992	0.578796	0.262487	0.073169	0.521214	0.486797	0.444007	0.131889	0.228359	0.711693	0.628091	0.835623
BnaA01g09000D	0	0	0.053064	0	0	0	0	0	0	0.160215	0.307061	0.119719	0	0	0	0	0	0.021875	0	0	0.039782	0.121772	0.040397	0	0	0
BnaA01g09010D	0	0	0	0	0.11036	0	0	0	0	0.105933	0.352543	0	0	0	0	0	0	0	0	0	0	0	0.088426	0	0	0
BnaA01g09020D	0.248497	0.37824	0.065521	0.499005	0.235287	0.422703	0.835196	0.854381	1.5365	1.05614	1.46649	0.484402	0.267904	0.201814	0.176884	0.197811	0.0747	0.049642	0.145959	0.050249	0.837755	0.67761	0.988148	0.407905	1.10818	0.462105
BnaA01g09030D	1.56312	2.08594	2.67929	1.11451	1.53659	4.47683	4.07648	2.77145	2.3048	1.56535	0.524037	2.89245	2.98619	2.92678	1.23505	1.60691	0.785131	2.44525	2.15137	3.60156	1.78333	4.6481	3.80577	1.73368	2.42218	1.67418
BnaA01g09040D	0.463077	0.350751	0.631799	0.552779	0.265675	1.49084	1.18267	1.5184	0.34423	0.153231	0.356269	0.388152	0.271355	0.271437	0.619676	0.869482	0.330925	0.1441	0.218217	0.438125	0.81195	0.556155	0.658293	1.10766	0.931402	0.860472
BnaA01g09050D	0	0	0	0	0	0	0	0	0	0	0	0	0	0	0	0	0	0	0	0	0	0	0	0	0	0
BnaA01g09060D	1.07937	0	0	1.07328	1.04965	0	0.318323	0	0	0.117916	0	1.88292	2.14112	0.648358	0.605375	0	0.890603	0	0.165516	1.43111	0	0.789869	0.730791	0.753512	0	0.167241
BnaA01g09070D	0.163943	0.198879	0.179018	0.529878	0.1846	0.387594	0.223967	0.139609	0.315515	1.43401	1.53084	1.67266	5.14597	0.606172	0.379449	0.312923	0.33728	0.21783	0.070213	0.281418	0.519754	0.09539	0.231464	0	0.096469	0.039842
BnaA01g09080D	0	0	0	0	0	0	0	0	0	0	0	0	0	0	0	0	0	0	0	0	0	0	0	0	0	0
BnaA01g09090D	0	0	0	0	0	0	0	0	0.064133	0	0	0	0	0	0	0	0	0	0	0	0	0	0	0	0	0
BnaA01g09100D	0	0	0	0	0	0.052892	0	0	0	0	0	0	0	0	0	0	0	0	0	0	0	0	0	0	0	0
BnaA01g09110D	19.7534	25.0218	23.9439	14.5154	12.5357	2.96519	3.02385	4.74028	16.0719	17.1736	12.5539	1.96778	1.73316	4.18025	20.8929	18.6643	20.322	15.8952	13.0086	16.1687	13.6628	9.88189	7.847	18.9932	21.6097	18.7234
BnaA01g09120D	4.45195	5.89427	6.90707	9.36182	6.38723	28.8763	19.1085	18.6322	5.89852	7.4512	8.27515	21.7641	21.1641	24.3447	6.78113	6.69806	9.17707	14.2948	14.1993	17.9548	14.2244	13.1552	15.1286	8.37529	12.387	12.6542
BnaA01g09130D	0.811038	0.621032	0.923268	0.461036	0.18406	0.547132	0.322671	0.743195	0.271438	0.470536	0.319828	0.263944	0.187955	0.49887	0.548729	0.973658	0.639754	0.288345	0.532308	0.171737	0	0.294069	0.057134	0.373169	0.658915	0.560622
BnaA01g09140D	0	0	0	0	0	0	0	0	0	0	0	0	0	0	0	0	0	0	0	0	0	0	0	0	0	0
BnaA01g09150D	1.03188	0.723138	0.526443	0.28437	0.066162	0.309314	0.112797	0.247762	0.496612	0.881565	0.043768	1.02513	0.863032	0.468432	0.653399	0.389956	0.309678	0.282512	0.068007	0.877536	0.058022	0.531995	0.313844	0.948249	0.320286	0.461639
BnaA01g09160D	7.12274	5.82799	7.09078	5.30596	5.71936	30.4747	18.0296	33.014	0.365599	9.0808	7.77154	12.5096	21.488	17.5962	15.0683	14.3828	7.96859	9.64671	13.9446	11.7515	26.995	29.4529	31.9168	15.9494	14.3471	16.3631
BnaA01g09170D	0	0	0	0	0.138763	0	0	0	0	0	0	0	0	0	0	0	0	0	0	0	0	0	0	0	0	0
BnaA01g09180D	1.54314	2.61775	0.907111	0.755489	1.12844	2.75127	3.5801	3.58184	1.38598	1.44562	0.878446	1.26404	1.62115	1.5855	2.072	2.0658	2.63099	0.677526	2.92267	1.09163	1.65068	1.29632	0.412462	4.01982	3.7934	4.07735
BnaA01g09190D	0	0	0	0	0	0.198465	0.163549	0	0.111455	0.397855	0.331289	0.77599	1.25	1.10628	0.079215	0.178611	0.205558	0.433528	0.747643	0	0.165049	0	0.246475	0	0.31908	0.204416
BnaA01g09200D	13.6828	13.5315	3.87035	18.1904	15.769	24.4326	10.249	13.7049	49.3765	58.3204	49.5512	84.5612	133.512	73.0447	12.6436	22.9074	15.2267	22.7504	23.5285	23.3688	4.42118	3.70302	9.96599	6.73779	7.23246	19.4198
BnaA01g09210D	0.08573	0.323028	0.073403	0.084215	0.174696	2.91136	0.739771	1.5096	0.15483	0	0.162266	0.234189	0	0	0.250319	0.140959	0.347535	0	0.489898	0.189389	0.31475	0.388395	0.387989	1.23073	1.36593	1.64283
BnaA01g09220D	0	0	0	0	0	0	0	0	0	0	0	0	0	0	0	0	0	0.590019	0	0	0	0	0	0	0	0
BnaA01g09230D	0	0	0	0	0	0	0	0	0	0	0	0	0	0	0	0	0	0	0	0	0	0	0	0	0	0
BnaA01g09240D	0.13522	0	0	0	0	0	0	0.037639	0.061525	0	0	0	0	0.04383	0.069171	0.042459	0	0	0	0.086141	0	0.04278	0	0.251224	0	0.043415
BnaA01g09250D	0.687171	0.107746	0.095093	0.05002	0.107897	0.612404	0.61804	1.89227	0.090738	0.64449	1.52899	0.429874	0.644013	0.095354	0.063929	0.598241	0.224696	0.136265	0.49079	0.562267	0.101635	0.091846	0.420167	0.202218	0.038706	0.391716
BnaA01g09260D	1.01931	0.855378	0.881142	0.327038	0.33525	1.46139	0.953816	1.45147	0.643332	0.616183	0.374197	0.532014	1.07814	0.70682	0.563966	0.693079	0.2914	0.920025	1.4904	1.57467	0.856825	0.661669	0.741866	0.744198	1.05637	1.13391
BnaA01g09270D	165.105	172.817	155.959	75.6956	74.2446	13.0066	19.2274	20.786	94.1981	95.9955	83.8723	22.0353	24.3232	30.6186	70.579	64.4922	83.7221	58.7938	56.2503	46.3193	39.1621	45.9514	19.7949	81.4314	75.2854	74.1108
BnaA01g09280D	1.1949	1.09725	1.10134	1.26503	1.20146	0.68566	0.752683	0.622857	1.64424	0.652916	0.816903	0.76368	1.12967	0.731798	0.625746	1.04884	0.973654	1.53488	0.884708	1.68869	0.799846	0.881371	1.21755	1.08652	0.81034	1.04935
BnaA01g09290D	24.6878	24.3364	21.617	16.16	14.3189	22.6129	22.6308	22.0586	26.401	31.5615	23.4432	26.4135	28.4491	24.5138	13.6838	13.334	14.284	20.8483	17.1845	19.8637	15.2012	18.2394	18.1077	19.3692	18.2966	23.4479
BnaA01g09300D	0	0	0	0	0	0	0	0	0	0	0	0	0	0	0	0	0	0	0	0	0	0	0	0	0	0
BnaA01g09310D	0	0	0	0	0	0	0	0	0	0	0	0	0	0	0	0	0	0	0	0	0	0	0	0	0	0
BnaA01g09320D	0	0	0	0	0	0	0	0	0	0.133735	0	0	0	0	0	0	0	0	0	0	0	0	0	0	0	0
BnaA01g09330D	0	0	0	0.033266	0	0	0.021998	0	0.028989	0	0	0	0	0	0	0	0	0	0.02491	0.022059	0.021041	0	0	0	0	0
BnaA01g09340D	0	0	0	0	0	0	0	0	0	0	0	0	0	0	0	0	0	0	0	0	0	0	0	0	0	0
BnaA01g09350D	0	0	0	0	0	0	0	0	0	0	0	0	0	0	0	0	0	0	0	0	0	0	0	0	0	0
BnaA01g09360D	0	0	0	0	0	0	0	0	0	0	0	0	0	0	0	0	0	0	0	0	0	0	0.031038	0	0	0
BnaA01g09370D	5.23443	5.06202	4.09715	0.974434	0.631761	1.42491	1.55035	1.60613	0.558665	0.630622	0.603485	1.04058	1.37117	1.33244	4.29842	4.57822	4.48017	4.56279	4.41497	3.88653	2.50305	3.84986	1.55286	4.77431	4.31221	3.90629
BnaA01g09380D	4.81468	5.56821	4.99877	5.43706	2.97066	10.2146	9.40005	11.0071	4.27899	4.61065	3.56649	23.5433	23.4179	28.4256	4.36651	4.11959	5.50274	19.6726	16.4888	18.4413	8.90943	10.7615	12.9635	4.69549	6.17307	7.27907
BnaA01g09390D	0.205739	0.188455	0.084361	0.047023	0.017544	0.575396	0.114417	0.068834	0.230956	0.132631	0.127371	0.291343	0.081458	1.21419	0.068717	0.309895	0.224391	0.084444	0.420781	0.123288	0.108369	0.31333	0.093523	0.215662	0.132037	0.270705
BnaA01g09400D	3.33094	2.0521	2.04123	1.87154	2.11617	4.51482	2.13564	3.4507	2.9518	3.84819	2.42345	4.3385	3.46739	3.19279	2.60809	3.42621	4.13068	5.57032	5.46583	5.97395	2.92307	2.98457	3.07283	3.89898	4.12486	2.95059
BnaA01g09410D	0	0	0	0	0.092326	0.1162	0.112788	0	0	0	0.113084	0.166034	0.151187	0.096942	0.093327	0	0.113093	0.112483	0.059295	0	0.332511	0.056545	0	0.09291	0	0
BnaA01g09420D	0	0.014968	0.000144	0	0	0	0	0	0	0	0	0	0	0	0	0	0	0	0.450667	0	0	0	0	0	0	0
BnaA01g09430D	0.64384	0.687562	1.12834	0.55177	0.531265	1.19616	1.08791	1.11677	0.592093	0.598177	0.752666	0.632603	0.561684	0.654751	0.633029	0.900569	0.581392	0.997423	0.031375	1.23279	1.03105	1.09135	1.31239	1.39594	1.19355	0.857568
BnaA01g09440D	0	0.096245	0	0	0	0	0	0	0	0	0	0	0	0	0	0	0	0	0	0	0	0	0	0	0	0
BnaA01g09450D	0	0	0	0	0	0	0	0	0	0	0	0	0	0	0	0	0	0	0	0	0	0	0	0	0	0
BnaA01g09460D	0	0	0	0	0	0	0	0	0	0	0	0	0	0	0	0	0	0	0	0	0	0	0	0	0	0
BnaA01g09470D	6.93778	7.6059	5.20274	3.28275	2.89823	2.43879	2.437	3.69561	2.17723	4.81089	2.15974	3.6662	3.85052	4.79368	3.29519	2.32913	4.15482	4.20227	5.91585	3.98653	4.49413	4.93293	4.98519	9.30313	7.74619	6.03389
BnaA01g09480D	0.817074	0.974761	1.01755	0.475645	0.799603	1.67491	1.43037	1.83948	0.843663	0.938375	0.619442	1.67037	1.12613	1.92879	0.7424	1.01701	1.64384	1.3196	1.33059	1.27036	1.67328	1.36853	1.17	1.99817	1.86229	1.69751
BnaA01g09490D	0	0	0	0	0.041081	0	0.164526	0	0.171482	0.320194	0	0.501756	0	0.325454	0	0	0	0	0	0	0.079895	0	0	0.079807	0.080793	0
BnaA01g09500D	0	0	0	0	0	0	0	0	0	0	0	0	0	0	0	0	0	0	0	0	0	0	0	0	0	0
BnaA01g09510D	0.360372	0.83878	0	0	0.533935	0	0	0.069416	1.16295	0.399679	0.413685	0.332344	0.170164	0.07923	0.564208	0	0.211891	0.079458	0.45877	0.481622	0.55208	0	0.115187	0.228205	0.297262	0.113611
BnaA01g09520D	0	0	0	0	0	0	0	0	0	0	0	0	0	0	0	0	0	0	0	0	0	0	0	0	0	0
BnaA01g09530D	9.29213	9.59162	8.71598	3.45492	3.108	9.08802	7.67812	7.78302	17.0522	16.7418	14.7533	17.8824	16.9956	12.9928	6.22991	6.71274	6.00082	7.61266	10.9948	7.84663	8.44939	9.79963	7.51215	10.9465	12.0763	10.9954
BnaA01g09540D	13.9011	12.1666	7.87915	2.81367	3.93678	2.7743	3.38538	5.06034	8.8218	12.4225	7.96613	37.7563	59.3662	51.3	3.87204	4.75365	4.89683	10.9537	12.0382	12.2272	1.16312	2.06886	1.69241	12.0982	8.18861	11.2187
BnaA01g09550D	10.2293	10.2202	10.1333	3.85044	1.45	0.631257	1.50536	1.51368	5.77532	5.2968	2.58226	0	1.24386	0.781335	6.84782	6.54247	5.1039	10.3454	4.42149	9.84021	2.75681	2.86425	0.994624	15.5163	9.58292	13.3512
BnaA01g09560D	0.870635	1.07558	0.357293	0.504418	0.544879	0.078442	0.186168	0.044051	0.384289	1.05968	0.543517	2.46319	3.4031	2.68282	0.371091	0.480311	0.397899	1.37574	1.15112	1.17086	0.181022	0.45591	0.233211	1.04282	0.467892	0.401439
BnaA01g09570D	0.981769	1.96715	0.953755	0.166476	0.06695	0.120755	0.19149	0.132777	0.177496	0.200692	0.091085	2.79072	4.01654	1.98125	1.14764	0.608815	0.956165	2.23235	1.83975	1.15977	0.265303	0.312309	0.345307	2.11364	1.19716	0.966345
BnaA01g09580D	0	0	0	0	0	0	0	0	0	0	0	0	0	0	0	0	0	0	0	0	0	0	0	0	0	0
BnaA01g09590D	0	0	0	0	0	0	0	0	0	0	0	0	0	0	0	0	0	0	0	0	0	0	0	0	0	0
BnaA01g09600D	0	0	0	0	0	0	0	0	0	0	0	0	0	0	0	0	0	0	0	0	0	0	0	0	0	0
BnaA01g09610D	0	0	0	0	0	0	0	0	0	0	0	0	0	0	0	0	0	0	0	0	0	0	0	0	0	0
BnaA01g09620D	1.38519	1.98816	1.03921	1.40238	1.00144	2.17937	3.48121	2.63228	3.60614	3.06603	2.69748	8.43214	5.77786	7.53737	1.90885	3.08184	2.14213	3.63475	2.64941	3.55897	2.34354	2.36292	2.28928	2.5529	2.27729	1.45639
BnaA01g09630D	0	0	0	0	0	0	0	0	0	0	0	0	0	0	0	0	0	0	0	0	0	0	0	0	0	0
BnaA01g09640D	108.479	98.7037	107.226	90.8924	87.0101	19.214	36.2197	33.3252	91.3611	80.6711	77.4196	50.1837	52.5083	60.4658	75.9265	61.5468	90.7679	119.811	108.385	103.638	85.0915	93.6048	64.1102	129.981	124.62	114.272
BnaA01g09650D	0	0	0	0	0	0	0.115013	0	0	0	0	0	0	0	0	0	0	0	0	0	0	0	0	0	0	0
BnaA01g09660D	0.176966	0.057983	0.05742	0.173645	0.118193	1.8763	0.965619	1.11102	0.175021	0	0.351759	0.101203	0.044686	0.327955	0.330506	0.237131	0.242919	0.517334	0.292076	0.572254	0.795528	0.446537	0.661953	0.491346	0.286802	0.640587
BnaA01g09670D	0	0	0	0	0	0	0	0	0	0	0	0	0	0	0	0	0	0	0	0	0	0	0	0	0	0
BnaA01g09680D	0.111889	0.391145	0.373015	0.071213	0	0.074879	0	0.093607	0.286267	0.420221	0.681897	0	0.077314	0	0.893301	0.543076	0.25819	0.027756	0.22487	0	0	0.074918	0.049105	0.041977	0.451739	0.212093
BnaA01g09690D	0	0	0	0	0	0	0	0	0	0	0	0	0	0	0	0	0	0	0	0	0	0	0	0	0	0
BnaA01g09700D	1.05837	0.622449	0.95946	0.728951	0.835138	0.899293	1.22738	1.7455	2.10898	0.865837	1.75627	0.476553	0.25301	0.244542	1.49914	2.12015	1.79111	0.709568	1.46157	1.10702	1.31921	1.40428	1.54363	1.51371	1.12227	1.35541
BnaA01g09710D	0	0	0	0	0	0	1.98017	0.197799	0.172379	0	0	0	0	1.98579	0	0	0	0.244128	0	0	0	0	0	0	0	0.000153
BnaA01g09720D	1.43589	2.07359	1.83476	0.912721	0.758423	2.24723	4.34941	2.88232	1.32347	1.77614	2.94598	0.580427	0.859086	0.343079	2.13153	1.26622	0.669239	0.048811	0.517818	0.782304	1.40636	1.35726	1.2383	1.64836	2.08996	1.948
BnaA01g09730D	2.18358	5.86592	0.057708	0.090172	0.03544	0.02654	0.099314	0	0.021289	0.032509	0.014146	3.59251	0.022611	1.42304	0.020327	0.024121	0	6.1613	0.045545	0	0.056959	0.01144	0.019018	0	0.017297	0
BnaA01g09740D	0.992623	0	1.70535	0	2.46775	0	0.024685	0	0	1.47049	2.87106	0.018469	0.049134	0	2.91047	0	0	1.02901	0	1.15117	0.917072	0.828017	0	0.46099	0.520664	0
BnaA01g09750D	0	0	0	0	0	0	0	0	0	0	0	0	0	0	0	0	0	0	0	0	0	0	0	0	0	0
BnaA01g09760D	0	0	0	0.080173	0.075712	0	0	0.055837	0	0	0	0	0	0	0.049311	0	0	0	0	0.05644	0	0	0	0	0	0
BnaA01g09770D	10.1603	9.26553	10.6155	8.10336	8.53763	8.96215	8.77928	9.79902	7.16174	7.8065	7.75456	3.20871	1.95025	2.97894	9.84764	9.49536	10.7786	12.029	13.5573	13.9803	10.2088	10.8699	10.4595	11.5793	11.8458	12.9362
BnaA01g09780D	0.083847	0.398446	0	0.156986	0	1.14672	0.707327	0.861233	0.133558	0.229823	0.150026	0.614993	0.476528	0.270816	0	0.218399	0.258002	0.415739	0.126359	0.649336	0	0	0.273186	0	0.140302	0.318996
BnaA01g09790D	0	0	0	0	0.155203	0	0.101681	0	0	0	0.057732	0	0	0	0	0.057111	0	0.057234	0	0	0	0	0	0	0	0
BnaA01g09800D	1.39	1.15539	1.32367	1.32771	1.2571	2.21068	2.68029	2.69456	0.481819	0.885474	0.956559	12.6504	4.03969	4.099	0.574816	1.14977	0.249058	1.44117	0.496867	4.47687	0.505438	1.14645	1.45535	2.61128	0.349821	3.61716
BnaA01g09810D	2.45232	2.86671	2.27688	3.12026	2.92125	1.39024	2.41904	1.31246	1.48174	1.44859	1.04238	4.03247	2.70583	2.58667	3.82995	2.79638	3.05945	4.8976	3.75272	5.2682	1.88685	0.842414	1.17911	1.60476	1.39367	1.92262
BnaA01g09820D	1.24361	1.47629	1.58328	0.485224	0.777238	0.724933	0.543753	0.839713	0.661494	1.16494	0.546283	0.098881	0.068961	0.043973	1.24127	1.33144	0.787813	0.945607	0.823554	0.471727	0.363297	0.238307	0.095081	1.92	1.38926	1.53853
BnaA01g09830D	3.03916	3.11952	3.47303	5.37735	4.70752	14.2249	14.6984	13.4916	4.95293	4.69805	6.36904	7.31581	5.19398	7.72232	6.66566	5.88854	5.56381	18.6807	11.3527	15.9933	11.7258	13.8109	19.0199	6.36565	8.87506	6.64073
BnaA01g09840D	0	0	0	0	0	1.19293	1.07856	2.6161	0	0	0	0.500821	0	0	0	0	0.216889	0	0	0.281264	0	0	0.639833	0	1.29381	1.05544
BnaA01g09850D	1.57912	1.4026	1.48782	1.47455	1.28933	1.8478	1.32112	2.1975	1.16003	1.45575	2.40514	1.15565	0.552831	0.968377	1.45342	1.69387	1.84224	0.774973	2.25909	0.785834	1.77375	1.92323	1.50231	1.34561	1.33728	2.08479
BnaA01g09860D	0	0.03828	0.057868	0	0.071922	0.117131	0	0.114233	0.012891	0.081045	0.100012	0	0	0	0.111437	0	0.117412	0	0.050507	0.045959	0	0	0	0.132061	0	0.077907
BnaA01g09870D	0.069564	0	0	0	0	0.111944	0.349665	0.572067	0.000169	0.000221	0.058386	0	0	0	0.47974	0.000345	0	0	0.30749	0	0	0	0.152122	0.189332	0	0.351138
BnaA01g09880D	8.49911	9.77182	10.3504	10.9315	9.30717	25.9731	18.341	21.128	14.6641	11.0278	11.7877	9.5894	13.2452	13.1492	8.21637	10.7602	10.5595	13.0272	17.5614	16.2768	17.8405	20.8541	16.1938	15.8728	17.8502	14.7112
BnaA01g09890D	0.000645	0.043548	0	0.001668	0.046225	0.061406	0.086098	0.095521	0.000326	0	0.00037	0.000828	0.000233	0.052787	0.019896	0.101293	0.047899	0.141522	0.002813	0.068616	0.128033	0.020745	0.134493	0.059138	0.08594	0.070974
BnaA01g09900D	340.619	194.808	493.92	512.511	431.497	105.797	191.73	288.4	107.902	79.7549	137.453	14.3996	9.67733	25.0215	631.267	385.633	444.666	390.949	417.911	446.915	949.214	1332.56	1074.03	268.718	393.565	341.379
BnaA01g09910D	3.14872	1.98649	2.5191	1.07868	1.51796	1.61792	1.82345	2.34607	2.6918	2.60607	2.60103	2.55608	3.06299	2.81206	3.45574	2.58007	2.18335	2.07822	2.56141	2.49672	2.20078	3.52849	2.5569	1.75612	2.01832	1.95113
BnaA01g09920D	1.18308	0.866963	0.890503	1.35577	0.671275	3.64928	2.13612	3.41858	2.06324	2.05277	1.84786	3.29882	2.60257	2.75857	2.05315	1.72348	0.592222	0.433477	0.94438	0.472091	2.13516	2.06554	1.96478	1.34177	0.902644	1.3454
BnaA01g09930D	1.12072	3.38451	2.43745	3.8251	3.95566	10.7724	10.7699	10.5815	3.90063	4.80628	1.26587	2.695	7.41492	8.75073	2.79762	2.01086	2.74593	1.17599	1.27927	5.67115	6.43393	3.91804	1.43642	5.90721	5.92741	6.43769
BnaA01g09940D	1.06418	2.94549	0.553927	0.844049	3.51582	1.78003	1.14793	0.284704	7.76649	4.67955	4.5215	7.58758	6.34762	4.65617	0.382142	1.74995	1.57892	1.69797	0.64936	2.56483	0.194947	1.77713	3.46388	0.156754	0.203723	0.594663
BnaA01g09950D	0.094865	0	0	0	0	0.164839	0.028272	0.134173	0.075309	0	0	0	0	0.037067	0	0	0.057733	0.076434	0	0	0.036715	0	0.114531	0.074097	0.333512	0.025027
BnaA01g09960D	0	0	0	0	0	0	0	0	0	0	0	0	0.056215	0	0	0	0	0	0	0	0	0	0	0	0	0
BnaA01g09970D	4.10858	0.146113	0.218275	0.212543	0.151801	6.18827	0.23074	0.246401	0.095347	0.306802	0.378965	3.96105	0.55742	3.78815	0.272469	0.316303	0.172743	0.414713	0.282512	3.6602	0.245366	0.406199	0.091458	5.81043	0.382121	0.158999
BnaA01g09980D	1.08379	1.08166	1.09759	0.692815	0.82756	2.4804	2.64498	2.28828	1.69768	0.567683	0.904199	0.536503	1.3189	0.718867	2.15799	2.33746	2.07517	0.900593	0.695026	1.15425	1.22491	1.43611	2.73914	0.797261	1.49869	0.641948
BnaA01g09990D	0.588413	0.205286	0.711239	0.441762	0.430972	0.343736	0.611242	0.85969	0.797329	1.0962	0.478828	0.656121	0.41745	0.800822	0.891063	0.372766	0.45612	0.705902	0.557413	0.148293	0.494939	0.413939	1.86099	0.196895	0.522359	0.322951
BnaA01g10000D	9.10364	7.10351	8.96687	29.5197	24.1443	20.7882	26.6203	14.3449	4.6877	8.69154	14.9033	16.4243	10.6744	12.8525	35.0132	17.8512	27.3656	13.3939	8.65631	10.3876	82.6965	131.328	234.251	5.76285	9.01038	7.23353
BnaA01g10010D	0	0	0	0	0	0	0	0	0	0	0	0	0	0	0	0	0	0	0	0	0	0	0	0	0	0
BnaA01g10020D	3.92057	5.21305	5.22273	2.30836	1.64199	0	0	0.750879	2.97144	5.221	5.96807	1.73749	1.05859	0	2.37347	0.793264	1.86702	0	1.69129	1.69818	1.16732	1.97412	0	1.15161	6.27577	4.11907
BnaA01g10030D	0.396198	0.141371	0.410341	0.076714	0.159402	0.078753	0.151456	0	0.687633	0.672882	1.12316	0.349913	0.357251	0.446077	0.22207	0.039307	0	0.117913	0.309418	0.279116	0	0.22535	0.157533	0.030455	0.116184	0
BnaA01g10040D	1.10836	1.08905	1.18451	0.618958	0.492983	0.914551	0.901516	1.08111	0.824374	1.42166	1.21581	0.273198	0.268179	0.305641	0.784197	1.11254	0.849045	1.03708	1.31849	1.31581	0.981198	1.52579	0.776185	1.91868	1.85166	1.65157
BnaA01g10050D	0.067787	0.037993	0.024873	0.086117	0.049161	0.238983	0.283634	0.070285	0.096482	0.030878	0	0.105394	0.098915	0.05817	0.073745	0.121129	0.161083	0.051866	0.054436	0.111926	0.091825	0.061568	0.06293	0	0.111594	0.023303
BnaA01g10060D	1.08464	1.98198	2.06042	1.88735	2.12237	6.24582	4.66269	5.05657	1.53826	2.54502	1.96915	1.9184	1.77355	1.68869	1.78018	1.56846	2.05196	3.26076	3.784	4.44744	4.24451	4.18011	3.96712	5.44242	6.89126	5.98504
BnaA01g10070D	0.13182	0.127195	0.088585	0	0	0	0	0.036838	0.032487	0.045428	0.042242	0.133714	0	0	0.088132	0.180845	0.094374	0	0.04479	0	0	0	0	0.29723	0.044001	0.073267
BnaA01g10080D	0	0	0	0	0	0	0	0	0	0	0	0	0.036076	0	0	0	0	0	0	0	0	0	0	0	0	0
BnaA01g10090D	0.230299	0.687366	0.251787	0.124341	0.0916	0.414693	0.690354	0.869703	0.061933	0.279944	0.118349	0.806865	0.562144	0.474741	0.508015	0.295691	0.075518	0.438079	0.707902	0.471141	0.47439	0.572705	0.375722	0.458045	0.304384	0.703991
BnaA01g10100D	2.31647	1.7911	1.72126	1.98365	2.10641	4.44746	4.76627	3.89715	3.93303	3.71137	3.41554	4.2713	4.82352	3.93679	2.34697	2.70637	1.38542	2.28738	2.39932	2.36675	4.57064	3.06399	3.84179	2.24169	2.13725	2.05388
BnaA01g10110D	15.4604	17.5775	14.2778	14.4142	12.6828	23.9487	21.9883	17.9149	22.2946	23.5929	22.1422	23.3585	27.5349	27.8069	11.7537	12.0444	8.05349	20.066	18.1841	15.7145	14.8329	14.6034	15.4006	17.3282	16.7234	20.7925
BnaA01g10120D	0	0	0	0	0	0	0	0	0	0	0	0	0	0	0	0	0	0	0	0	0	0	0	0	0	0
BnaA01g10130D	0.078412	0	0.076071	0	0	0	0	0	0	0	0	0	0.162739	0	0	0.157605	0	0	0	0.057918	0	0	0	0.078146	0	0.080712
BnaA01g10140D	0.648309	0.655427	0.481826	0.146445	0.476567	1.11262	0.904554	1.5779	0.288128	0.302419	0.511334	1.0232	1.63348	1.65251	0.300957	0.413721	0.717781	0.745011	1.22393	1.41777	0.526907	0.44636	0.43313	1.9424	0.776841	0.963796
BnaA01g10150D	0	0	0	0	0	0	0	0	0	0	0	0.126827	0.197316	0.112394	0.059547	0	0	0	0	0.040877	0	0	0	0	0	0
BnaA01g10160D	0	0.000327	0.000721	0.000699	0.134424	0.001028	0.000676	0	0.00971	0.094993	0.000555	0.000686	0.060676	0.150981	0.03424	0.097994	0	0.007675	0.009981	0.000706	0	0	0.002121	0.001127	0	0.077225
BnaA01g10170D	0	0.116494	0	0.20976	0	0	0	0.103932	0	0	0	0	0	0	0	0.064009	0	0.507374	0.236321	0.570343	0	0	0.151066	0	0	0
BnaA01g10180D	0	0	0	0	0	0	0	0	0	0	0	0	0	0	0	0	0	0	0	0.136876	0	0	0	0	0	0
BnaA01g10190D	0	0	0	0	0	0	0	0	0	0	0	0	0	0	0	0	0	0	0	0	0	0	0	0	0	0
BnaA01g10200D	1.43096	1.59764	1.1436	0.335392	0.186972	1.33557	0.728227	1.44694	0.565177	0.683795	0.687184	1.06751	0.663811	1.30273	0.930033	0.932788	0.782512	1.52678	0.89572	1.46076	0.980132	0.632841	0.855703	1.17563	1.31204	1.39281
BnaA01g10210D	0.102016	0.064581	0.023807	0.025771	0.076768	0	0.228354	0.103364	0.169737	0.061995	0	0.44687	0.523125	0.399177	0.112866	0.024353	0.019035	0.133101	0.038072	0.053745	0.139631	0.259416	0.273995	0.024105	0.050039	0.14526
BnaA01g10220D	4.2856	4.76739	4.28645	2.87204	2.53846	4.13519	4.01225	3.68851	4.72661	4.35865	7.26347	2.65219	2.43728	2.29163	3.34327	4.40795	3.41455	3.82455	4.38775	4.25732	4.4937	4.82018	4.56951	4.46048	4.3409	4.5193
BnaA01g10230D	0	0	0	0	0	0	0	0	0	0	0	0	0	0	0	0	0	0	0	0	0	0	0	0	0	0
BnaA01g10240D	0	0	0	0	0	0	0	0	0	0	0	0	0	0	0	0	0	0	0	0	0	0	0	0	0	0
BnaA01g10250D	0.216311	0.236512	0.24667	0.073839	0.17126	0.631699	0.639441	0.784324	0.166241	0.143969	0.135331	0.181957	0.349496	0.102108	0.371127	0.386458	0.257975	0.255532	0.28009	0.263481	0.157874	0.33597	0.188645	0.464473	0.389878	0.490901
BnaA01g10260D	1.18744	1.07407	0.411057	0.447658	0.289909	0.240292	0	0.208965	1.41293	0.768124	1.3418	0.338792	0.548912	0.534444	0.236606	1.18897	1.24912	0.603703	1.28964	2.20904	0.528841	0.641004	0.05516	0.272303	0.230396	0.42019
BnaA01g10270D	6.63038	5.91074	8.28416	14.9144	16.3925	27.7851	22.8386	24.9528	5.32172	4.47345	5.4545	11.6474	7.32651	14.4409	13.2296	12.1871	14.9671	13.5067	13.3888	14.5809	30.4014	25.0888	38.9729	10.0763	12.5866	11.258
BnaA01g10280D	4.76489	4.5274	3.59018	3.11885	3.29481	6.06902	7.02665	8.32507	4.487	5.55086	3.92978	12.3254	12.4058	10.046	3.31195	3.03456	2.78334	6.91657	7.74193	7.78597	4.73367	5.16653	4.99623	7.22975	4.96125	5.91678
BnaA01g10290D	0.31721	0.32518	0.105084	0	0.039756	0.039349	0.117088	0.073338	0	0.270742	0.079017	0.390996	0.46585	1.06503	0.052991	0.083518	0.16725	0.069311	0.22403	0.109475	0.246643	0	0.120127	0.15555	0.096951	0.032291
BnaA01g10300D	0	0.50826	0.201403	0.119926	0	0.188088	0	0.123336	0	0.017206	0.095401	0.189934	0.253378	0.214911	0	0	0	0	0	0.158963	0.011327	0	0.026859	0	0.122314	0
BnaA01g10310D	0	0	0	0	0	0	0	0	0.041783	0.00218	0.062136	0.042444	0	0	0	0	0	0	0	0	0	0	0	0	0	0
BnaA01g10320D	0	0	0	0	0	0	0	0	0	0	0	0.046384	0.053665	0	0	0	0	0	0	0	0	0	0	0	0	0
BnaA01g10330D	0.668188	1.62153	0.13113	0	0	0	0	0	0	0.35237	0	0	0	0	0	0	0	0	0	0	0	0	0	0	0.012147	0
BnaA01g10340D	0.622652	0	1.17291	0.419921	0.36158	0.323519	0.140475	0	0.69235	0.583239	0.723879	0.201086	0	0.689173	0.743361	0.950828	0	0	1.07509	0.457259	0.854242	0.563109	0	0	0.86359	0.682452
BnaA01g10350D	0	0	0	0	0	0	0	0	0	0	0	0	0	0	0	0	0	0	0.075104	0	0	0	0	0	0	0
BnaA01g10360D	0.258662	0.272317	0.263378	0.167121	1.08805	0.318138	0.154188	0.937662	0.230985	0.296818	0.192633	0.298051	0.689007	6.3375	0.210737	0.196094	0.346689	0.323376	0.25601	0.386694	0.321489	0.263606	0.153301	0.247827	0.547408	0.205771
BnaA01g10370D	19.0026	18.5294	18.5675	14.7511	16.7033	44.8549	39.2251	40.7129	12.7525	18.9867	13.3838	15.9025	19.7133	24.4162	18.2065	18.6418	15.725	22.8097	17.8818	17.9872	24.869	21.6929	20.704	24.8451	20.6394	17.4369
BnaA01g10380D	0.037864	0	0	0	0	0.183736	0.162415	0.160355	0	0	0	0	0	0	0	0	0.130121	0	0.026942	0.072847	0.103443	0	0	0	0	0.222536
BnaA01g10390D	0	0.037323	0.030984	0	0.125847	0.34605	0.203989	0.30212	0.056519	0.077569	0.072007	0.149263	0.155757	0	0.086848	0.056963	0.166569	0.037774	0	0	0.098264	0.175136	0.18566	0.035311	0.068258	0.165361
BnaA01g10400D	0.406066	0.276728	0.43446	0.154746	0.137817	0.320792	0.606975	0.512539	0.27387	0.255827	0.164114	0.368487	0.403739	0.263606	0.473118	0.279342	0.197518	0.629657	0.434962	0.382971	0.434063	0.656305	0.853211	0.62754	0.783899	0.68648
BnaA01g10410D	0.296336	0.464529	0.226623	0.194685	0.172638	0.678026	0.418108	0.618714	0.203984	0.239063	0.249306	0.558676	0.571561	0.544656	0.417076	0.428429	0.285325	0.326042	0.443381	0.466949	0.472414	0.508202	0.310781	0.589234	0.457667	0.390874
BnaA01g10420D	2.32281	1.11462	1.73541	5.51326	4.34401	1.70069	2.91592	2.5283	5.80666	5.30012	11.3334	7.05626	4.31534	4.76685	2.31756	1.98574	2.23938	1.92352	5.30153	3.52885	6.0353	7.96762	16.7357	0.954085	1.84459	1.44419
BnaA01g10430D	0	0	0.014058	0	0.026169	0	0	0	0	0	0	0	0	0	0.033904	0	0.015457	0	0	0.032915	0.080657	0.026752	0.059674	0	0	0
BnaA01g10440D	0.048964	0.034961	0.017368	0	0	0.017994	0	0.035932	0.017647	0.017814	0.018097	0	0.034079	0.036838	0.033232	0	0.069025	0.017941	0.105735	0.036199	0.03512	0	0	0.088676	0.066382	0
BnaA01g10450D	0	0	0	0	0	0	0	0	0	0	0	0.030446	0.04095	0.015995	0	0.017138	0	0.033892	0.032617	0	0.016924	0	0.034372	0	0	0
BnaA01g10460D	4.54762	5.23502	3.77745	1.39306	1.3674	0.429722	0.582179	0.894086	3.23866	4.55663	1.37915	3.298	4.40316	3.48299	1.79026	2.50035	2.82689	5.12027	7.79986	4.30949	0.349921	0.537132	0.227294	9.0561	6.81536	4.47751
BnaA01g10470D	0	0	0.287872	0	0	0	0	0	0	0.049127	0	0.073111	0	0.049772	0.047893	0.090154	0.149733	0.074297	0.218614	0.050249	0	0	0	0.098081	0.09893	0.049976
BnaA01g10480D	2.71708	1.91491	2.97819	1.14683	1.43781	0.707579	0.915894	0.697769	1.17935	2.57218	1.12722	0.29507	0.452561	0.383712	5.32272	4.92832	4.20501	0.193032	0.758731	0.064615	0.994875	0.840429	1.2801	1.19796	1.32386	1.05707
BnaA01g10490D	3.40882	3.89241	2.54653	2.53254	2.61769	5.97973	6.85941	4.88342	3.01647	2.95516	3.48243	5.45287	4.84662	5.62095	2.96372	2.33187	2.58585	5.84363	5.3046	5.21976	3.39323	5.48653	4.90284	4.16002	3.71138	5.54962
BnaA01g10500D	7.79254	6.81375	8.03182	4.85685	4.58493	3.63145	4.66664	3.02611	5.6744	7.11502	4.35685	16.2932	15.9196	15.9887	4.40099	2.88308	4.8231	12.4057	11.0404	11.7057	7.04484	8.62563	7.85346	10.6156	9.15497	8.21331
BnaA01g10510D	0.989035	0.98196	0.859097	1.70123	1.2649	3.45733	3.44459	2.59721	0.592277	0.816322	0.770302	1.55378	1.23555	2.84389	1.19841	0.886201	1.18504	2.0358	1.49942	2.35741	1.73975	1.74691	2.22861	2.12444	2.22095	2.11725
BnaA01g10520D	5.24737	4.94441	8.87593	19.8381	16.4305	90.8615	61.6195	56.5113	5.29327	6.50509	3.03649	2.53971	1.74906	4.4293	20.6227	12.8046	11.9427	15.9655	11.9609	18.223	26.5758	29.5822	42.4096	27.9947	33.7367	37.2911
BnaA01g10530D	0	0	0	0.039836	0.032173	0	0	0	0	0	0	0	0.014367	0.040424	0.147471	0	0.186675	1.13558	0	0	0.016768	0.019373	0.014979	0	0	0
BnaA01g10540D	0.121949	0.100042	0.163138	0.086926	0.261302	0.979307	0.333624	0.755543	0	0.144867	0.442094	0.443455	0.172236	0.211229	0.084247	0.180637	0.321104	0.467488	0.272502	0.558076	0.296319	0.425598	0.285184	0.449902	0.15698	0.502386
BnaA01g10550D	0	29.2278	0	0	0	0	0	0	103.148	94.5706	0	0	0	0	0	0	0	0	0	0	0	0	0.014102	0	0	0
BnaA01g10560D	0	0	0	0	0	0	0	0	0	0	0	0	0	0	0	0	0	0	0	0	0	0	0	0	0	0
BnaA01g10570D	0	0.158664	0.068315	0	0.079481	0	0.067299	0.155733	0	0	0.227201	0	0	0	0	0.324984	0	0	0.079844	0.148681	0	0.094241	0	0.144997	0.242175	0.20769
BnaA01g10580D	5.73715	4.95551	5.46104	10.6063	7.89459	15.3124	18.6267	15.1978	7.23163	7.63338	10.0898	5.73482	4.44134	7.53202	7.19101	5.39172	8.527	6.76887	6.93119	8.43915	12.8891	15.0234	16.6761	10.1437	13.4484	11.2782
BnaA01g10590D	0.923134	0	1.24808	0	0.679521	0.682859	1.03489	0.660346	1.123	0.501885	1.1906	1.00252	1.73787	1.41387	0.243329	0.215528	0.210297	0.692462	2.1857	0.854643	1.7309	1.10685	0.646851	0.101436	0.71705	0.732544
BnaA01g10600D	9.87362	7.98539	8.84007	10.8887	10.1407	28.3086	28.0068	28.0375	12.0907	10.7575	9.94547	22.871	20.2185	25.6149	17.1625	18.3908	13.5396	16.3359	18.3408	21.8916	24.2421	22.2117	29.9654	11.334	12.0222	11.1144
BnaA01g10610D	0	0	0	0	0	0	0.126452	0	0	0	0	0	0	0	0	0	0	0	0.117776	0	0.118194	0	0	0.118814	0.060262	0.065307
BnaA01g10620D	0.185733	0.239345	0.068364	0.081939	0.021318	0.018427	0.021379	0.021067	0.03104	0.041777	0.125979	0	0	0.065011	0.131857	0.145896	0.168859	0.042075	0.133974	0.10626	0	0.123874	0.042101	0.124834	0.062394	0.04293
BnaA01g10630D	7.05165	6.87061	5.38805	2.836	2.54449	6.26588	4.0589	6.7956	5.96662	6.92826	5.40558	10.1968	13.3842	15.7193	4.3698	5.17207	2.65821	6.2914	7.5552	7.22219	1.93357	4.50404	1.96884	9.66361	9.663	8.17183
BnaA01g10640D	0	0	0	0	0	0	0	0	0	0	0	0	0	0	0	0	0	0	0	0	0	0	0	0	0	0
BnaA01g10650D	1.6759	1.35875	0.748248	1.13437	0.906676	1.70699	1.89898	1.69933	3.15277	2.80789	2.25004	6.96534	8.05252	7.10517	0.809042	0.602367	0.463568	0.733603	1.04738	0.617246	1.77458	0.80379	0.99387	1.40217	1.18713	1.64041
BnaA01g10660D	0.432636	0.581324	0.879494	0.166367	0.097146	0.19786	0.298293	0.134208	0.692261	0.774922	0.466497	2.2527	2.54034	2.16034	0.217133	0.394178	0.121272	0.365692	0.657862	0.437726	0.103005	0.188461	0.040141	0.259832	0.245041	0.259813
BnaA01g10670D	7.13783	6.69535	4.12066	2.00586	1.53941	2.23797	1.63376	2.30922	3.48488	3.05806	3.3412	1.98961	2.24375	2.45581	1.9491	2.84021	3.47063	3.86644	3.27416	3.07484	2.37612	1.12383	1.66943	2.90555	3.07727	2.47476
BnaA01g10680D	0.202454	0.469497	0.296768	0.240121	0	0.273276	0.164973	0.17866	0.109652	0.093335	0	0.690767	0.518756	0.63267	0.096406	0.203344	0.299242	0.363563	0.294526	0.320973	0.161058	0.153014	0.284809	0.162331	0.312926	0.057315
BnaA01g10690D	0.206671	0.286863	0.271811	0.746856	0.362491	0.1557	0.39644	0.253633	0.397318	0.874354	0.919674	0.498751	0.792982	0.400514	0.067002	0.111847	0.321079	0.118716	0.170884	0.240237	0.26408	0.188087	0.363891	0.289665	0.106834	0.204646
BnaA01g10700D	0	0	0	0	0	0	0	0	0	0	0	0	0	0	0	0	0	0	0	0	0	0	0	0	0	0
BnaA01g10710D	0	0	0	0.035887	0.033861	0	0	0	0	0	0	0	0	0	0.035557	0.052713	0	0	0	0	0.036074	0.017663	0.036878	0	0	0
BnaA01g10720D	0	0	0	0.035955	0.007982	0	0	0	0	0	0	0	0	0	0	0	0	0	0	0	0	0	0	0	0	0
BnaA01g10730D	0	0	0	0	0	0	0	0	0	0	0	0	0	0.012224	0	0	0	0	0	0.015002	0	0	0	0.019161	0	0
BnaA01g10740D	4.99616	4.37582	2.91886	2.48671	2.3566	6.88088	6.12884	5.76651	4.25102	10.1348	4.59411	1.9443	2.8885	2.01824	3.16466	2.39851	2.93026	8.02536	9.7438	10.6405	3.31282	4.05274	2.67835	9.72539	8.66086	10.1592
BnaA01g10750D	12.9773	10.4725	4.79989	42.5418	21.7719	17.0134	16.5294	11.7923	242.004	292.423	380.176	75.6993	89.2529	81.6365	13.1498	14.2889	6.3731	28.1676	9.44294	11.9237	40.4063	10.9732	47.4765	20.4152	24.2907	16.1157
BnaA01g10760D	0.018733	0.059191	0.083887	0.117391	0.095607	0.330899	0.124727	0.119384	0.037807	0.017054	0.209191	0.062281	0.200929	0	0.022081	0.061185	0.026252	0	0.034674	0.017694	0.041949	0.129166	0.083988	0.230938	0.148347	0.062592
BnaA01g10770D	0	0.070276	0	0.035351	0.88061	0	0	0	0.020831	0.212687	0.057536	1.17223	0.636316	0.670912	0	0	0.021658	0	0	0	0	0	0	0	0	0
BnaA01g10780D	4.78526	6.86763	5.24133	3.01624	3.80546	3.68441	2.80653	3.53363	4.6192	7.08469	5.42039	2.44851	2.12369	1.62762	4.252	4.67837	3.81341	3.86993	3.72268	4.36332	1.37211	2.42305	1.36869	7.18293	7.90166	7.55824
BnaA01g10790D	0.784399	1.18522	0.212977	1.04996	1.12626	2.80977	2.17454	3.22111	4.92609	4.51394	3.58541	1.72041	1.44977	2.34526	0.537937	0.694715	0.522062	1.03364	1.25126	1.28894	1.58005	1.64291	1.89552	0.412378	0.555273	0.607703
BnaA01g10800D	1.20833	1.73882	1.35349	0.762298	1.63681	3.1753	3.20845	3.60348	3.18381	2.5157	2.76155	4.94123	4.65876	3.70302	1.31484	2.05024	0.965614	1.7409	2.29099	1.64235	1.26323	1.11267	1.14817	1.09182	0.853518	1.07279
BnaA01g10810D	0.470716	0.553001	0.391408	0.379487	0.37779	0.266685	0.175469	0.895897	0.426449	0.446398	0.478456	0.337717	0.242059	0.473038	0.173733	0.257119	0.285477	0.381583	0.427755	0.552608	0.150344	0.179735	0.091778	0.838886	0.342215	0.540661
BnaA01g10820D	0.043121	0	0	0	0	0.02899	0.083737	0	0	0	0.029253	0	0.029633	0.074485	0	0	0	0	0	0	0	0	0.029019	0	0	0
BnaA01g10830D	0.148569	0.204293	0.137298	0	0.037567	0.062457	0.119447	0.248159	0.051216	0.223074	0.138236	0.305827	0.396159	0.508263	0.089751	0.064445	0.05235	0.308504	0.390412	0.279196	0.229334	0.206239	0.135321	0.178423	0.211859	0.180751
BnaA01g10840D	1.3085	1.56458	1.41407	0.923239	0.663625	1.04383	0.58667	0.865701	0.229191	0.346708	0.238877	0.589935	0.737433	0.570242	0.885195	1.08336	1.02797	0.744996	1.13558	0.8601	0.472927	0.594858	0.343612	1.44761	1.6321	1.46622
BnaA01g10850D	0	0	0	0	0	0	0	0	0	0	0	0	0	0	0	0	0	0	0	0	0	0	0	0	0	0
BnaA01g10860D	0	0	0	0	0	0	0	0	0	0	0	0	0	0	0	0	0	0	0	0	0	0	0	0	0	0
BnaA01g10870D	0	0	0	0	0	0	0	0	0	0	0	0	0	0	0	0	0	0	0	0	0	0	0	0	0	0
BnaA01g10880D	0.054747	0.053814	0	0.844519	0.909741	11.762	6.53299	8.16474	0	0.05484	0	9.96424	7.7245	19.9731	0.053285	0	0.110875	0.165691	0	0.223252	1.51276	0.055529	0.428669	0.383208	0.164918	0.450639
BnaA01g10890D	0	0	0	0	0	0	0	0	0	0	0	0	0	0	0	0	0	0	0	0	0	0	0	0	0	0
BnaA01g10900D	0	0	0	0	0	0	0	0	0	0	0	0	0	0	0	0	0	0	0	0	0	0	0	0	0	0
BnaA01g10910D	0	0	0.077847	0	0	0	0	0	0	0	0	0	0	0	0	0	0	0	0	0	0.071839	0	0	0	0	0
BnaA01g10920D	0	0	0	0	0	0	0	0	0	0	0	0	0	0	0	0	0	0.061506	0	0	0	0	0	0	0	0
BnaA01g10930D	0	0	0	0	0	0	0	0	0	0	0	0	0	0	0	0	0	0	0	0	0	0	0	0	0	0
BnaA01g10940D	0.187799	0.22289	0.184263	0.154639	0.187318	0.137129	0.181992	0.12963	0.305534	0.288243	0.22025	0.168597	0.148709	0.151906	0.160975	0.168849	0.175106	0.190396	0.211135	0.185069	0.156621	0.185615	0.17341	0.230068	0.184224	0.231276
BnaA01g10950D	0	0	0	0	0	0	0	0	0	0	0	0	0	0	0	0	0	0	0	0	0	0	0	0	0	0
BnaA01g10960D	0.549197	1.03297	0.611294	0.378313	0.406295	1.28989	0.924453	1.29706	0.588697	0.947521	0.636637	1.0489	0.860681	1.56802	0.469323	0.449518	0.375433	1.03484	0.664173	1.16143	1.11897	0.802183	0.995739	0.989154	1.0518	1.12004
BnaA01g10970D	0.317361	0.426928	0.158795	0.341092	0.242179	0.486498	0.273424	0.39391	0.096244	0.234454	0.14799	0.70316	0.619961	1.14374	0.078225	0.164002	0.267359	0.37659	0.175862	0.629414	0.25534	0.165242	0.374959	0.471452	0.346298	0.465858
BnaA01g10980D	0	0.066467	0	0.030595	0	0.160235	0.08515	0.047686	0.059376	0.019343	0.042258	0	0	0	0.070596	0.020693	0.046113	0.040916	0.020575	0.020991	0.081323	0	0	0.092534	0.031308	0.13602
BnaA01g10990D	2.17392	1.70493	1.6465	1.00311	1.53111	2.69014	2.7168	2.07314	2.47285	2.05184	2.34923	2.69879	3.17418	3.71809	1.35799	1.06576	1.20674	2.03001	1.98026	2.69468	0.85363	1.04614	1.24515	1.93264	1.32246	3.24376
BnaA01g11000D	3.02377	4.63667	2.97776	3.30473	2.04516	5.58936	6.18568	3.75992	2.67521	2.72265	2.77054	3.7504	3.63667	3.96901	3.13815	3.06387	3.96639	6.14898	5.68902	5.36584	4.27112	3.99839	3.07735	4.56816	4.41913	4.19705
BnaA01g11010D	0	0	0	0	0.009444	0	0	0	0.004584	0.006169	0	0.027667	0	0.0128	0	0	0	0	0	0	0	0	0	0	0	0
BnaA01g11020D	5.7629	7.06044	6.71793	9.2716	7.72233	15.8667	14.954	16.0629	7.06474	7.32911	6.71181	11.8946	9.35418	11.0243	6.12892	7.98834	7.65109	12.5731	12.0348	11.8196	10.7554	12.837	10.9053	13.5673	15.2239	11.1105
BnaA01g11030D	1.13201	0.918122	1.13999	0.09828	0.313104	0.871113	0.660569	1.26329	0.511488	0.650482	0.316832	2.24054	3.81844	3.86083	0.407678	1.01279	0.523361	0.682294	1.70206	1.06198	0.194135	0.274122	0.332067	1.3331	0.430715	1.28056
BnaA01g11040D	0	0	0	0	0	0	0	0	0	0.156243	0	0	0	0	0	0	0	0	0	0.145442	0	0	0	0	0	0
BnaA01g11050D	0	0	0	0	0	0	0	0	0	0	0	0	0	0	0	0	0	0	0	0	0	0	0	0	0	0
BnaA01g11060D	0	0	1.29508	0	0.826929	0.79556	0	0	1.98149	0.722328	0	0	0.099143	0	0	0	0.701567	0	0	0	0	0	0	0.000709	0	1.61113
BnaA01g11070D	0.010065	0.00541	0.007526	0	0.047836	0.001807	0.084571	0.001962	0.002766	0.00966	0.011573	0.02216	0.024079	0.000404	0.02322	0.007001	0.041058	0.026941	0.022981	0	0.02491	0.037354	0.008981	0.015277	0.00392	0.005324
BnaA01g11080D	0.39684	0.274123	0.235835	0.114547	0.146285	0.149772	0.068203	0.315721	0.113264	0.025108	0	0.180327	0.064983	0.076754	0.052344	0.156447	0.104798	0.31428	0.666571	0.285733	0.081855	0.14967	0.162866	0.474058	0.431071	0.467504
BnaA01g11090D	5.34422	7.76484	6.37638	4.41634	4.09798	4.51446	4.27053	5.79011	2.8431	3.42633	3.64774	5.96954	5.35025	5.34817	4.71482	6.2351	6.5411	4.90253	6.58438	5.66868	4.39548	4.23154	4.96669	3.62677	4.51632	4.06355
BnaA01g11100D	9.82786	9.50258	8.49141	5.71029	3.8257	6.7969	4.83097	9.6234	7.68	8.38251	5.78446	1.60607	1.28658	1.3434	5.62958	5.82343	6.67238	7.19384	8.24816	8.62506	5.37889	5.7087	4.48953	13.2043	11.2966	10.6257
BnaA01g11110D	0	0	0	0	0	0	0	0	0	0	0	0	0	0	0	0	0	0	0	0	0	0	0	0	0	0
BnaA01g11120D	0	0	0	0	0	0	0	0	0.167777	0	0	0.181927	0.118094	0	0	0	0	0	0	0	0	0	0	0	0	0
BnaA01g11130D	23.8358	25.8292	22.6158	10.1645	10.6885	15.6377	15.2809	18.2493	20.9718	24.716	19.2867	26.1767	29.4032	29.6815	13.091	13.291	11.4443	22.1607	19.7672	20.4713	13.8613	14.4754	12.9816	19.2301	18.5849	20.1398
BnaA01g11140D	0.685815	0.879281	1.28581	0	0.478978	0.97973	0.394542	0.749766	3.19471	0.356856	4.46188	8.28403	3.53117	8.75473	1.01319	1.81234	0	0.970491	0.554377	0.53776	0.633142	0.576174	1.54079	0.226816	0.098945	0.523287
BnaA01g11150D	0	0	0	0	0	0	0	0	0	0	0	0	0	0	0	0	0	0	0	0	0	0	0	0	0	0
BnaA01g11160D	0	0	0	0	0	0	0	0	0	0	0	0.299443	0.265342	0	0	0	0	0	0	0	0	0	0	0	0	0
BnaA01g11170D	0	0	0	0	0	0	0	0	0	0	0	0	0	0	0	0	0	0	0	0	0	0	0	0	0	0
BnaA01g11180D	0	0	0	0	0.039882	0	0.036183	0	0.03542	0.034848	0	0	0.070291	0	0	0	0	0	0	0	0	0	0.106873	0.035096	0.046524	0
BnaA01g11190D	544.75	710.567	566.415	345.205	287.885	66.8234	106.436	89.5592	199.921	258.25	211.639	21.0642	17.984	24.9265	484.335	455.688	548.95	235.875	203.881	213.723	225.039	188.086	171.802	352.304	342.946	301.969
BnaA01g11200D	0.234237	0.287922	0.523708	0.082985	0.28295	0.498951	0.595076	0.725356	0.15671	0.150795	0.184764	0.721624	0.417387	0.58003	0.414362	0.064626	0.430194	0.33509	0.746845	0.358562	0.220624	0.239807	0.383543	0.672464	0.76353	0.596996
BnaA01g11210D	0.767914	2.61341	0.418203	1.68379	2.20401	0.944444	1.02584	1.98471	0.374007	0	1.80923	0.753308	0	0.772948	1.76594	1.41406	1.67594	1.35748	0.705951	0.740007	1.88066	1.76406	2.12832	1.05822	0.602649	1.41127
BnaA01g11220D	0.083898	0	0.099053	0	0.044082	0	0	0	0.128013	0.160897	0.579148	0.28005	0.257563	0.066692	0	0.104965	0	0.065471	0.139339	0	0	0.021942	0.054593	0.042975	0	0
BnaA01g11230D	0.478617	0.611036	0.448224	0.958364	1.21962	0.0825	0.98135	0.141022	0.386521	1.14196	1.19793	3.93955	4.37857	2.52733	0.410306	0.701104	0.393666	0.362586	0.235887	0.417361	2.19667	1.43626	1.68255	0.197718	0.20596	0.517354
BnaA01g11240D	0	0	0	0	0	0	0	0	0	0	0	4.56113	0.052316	0	0	0	0	0	0	0	0	0	0	0	0	0
BnaA01g11250D	0	0.057894	0	0	0	0	0	0	0.058446	0	0	0	0	0	0.057325	0.029646	0	0	0.029182	0.045109	0	0	0	0	0	0
BnaA01g11260D	0	0.076722	0	0.137635	0.294313	0.388399	0.195465	0.258858	0.173317	0	0.083333	0	0	0	0	0.096284	0.048669	0.158774	0.06847	0	0.094761	0	0.096873	0	0.084249	0.179454
BnaA01g11270D	0.613034	0.582791	0.644137	0.650052	0.569308	0.412731	0.610597	0.613756	0.87119	1.0337	0.775057	0.310897	0.526132	0.400084	0.728398	1.13174	0.4799	0.372455	0.351478	0.294095	0.241859	0.241759	0.268636	0.650932	0.704926	0.363798
BnaA01g11280D	3.24784	3.23305	2.46111	8.90768	9.98735	5.73975	9.13412	5.08401	6.3109	12.3631	5.29418	6.35459	6.7737	3.97984	8.61522	5.21163	6.86617	14.7998	9.77962	10.6132	6.37566	6.66265	6.94988	3.85446	3.16798	2.98517
BnaA01g11290D	10.1256	13.2796	8.09184	5.27569	4.85972	1.05531	0.975285	0.765872	5.64278	7.26285	3.61749	0.595232	0.353939	0.268062	5.01095	3.89654	6.08293	1.15311	1.06848	0.838831	0.615416	0.43083	0.374097	3.23399	4.14398	4.77261
BnaA01g11300D	0	0	0	0	0	0	0	0	0	0	0	0	0	0	0	0	0	0	0	0	0	0	0	0	0	0
BnaA01g11310D	11.8479	12.4434	13.9999	25.7131	26.1671	48.0746	39.9269	45.4999	19.2228	18.9011	25.9702	17.3623	14.182	18.714	19.1731	19.3763	17.7075	29.4019	31.2308	32.0626	43.3497	39.3294	47.1178	22.3763	28.4212	25.6017
BnaA01g11320D	4.28769	5.32207	4.64241	6.24396	4.78165	4.04106	5.25315	4.2632	4.05819	3.44329	3.43773	3.62979	3.66441	5.09582	3.97334	3.8199	5.67676	5.01789	4.41062	4.31029	5.2114	3.89299	4.63591	4.41849	4.6479	4.6089
BnaA01g11330D	0.037153	0.036888	0	0.08851	0.038255	0	0.153771	0.113232	0	0	0.111622	0	0.024599	0	0.054788	0.113082	0.035127	0	0.136755	0.065659	0.148723	0.110638	0.302365	0.075051	0.075448	0.033607
BnaA01g11340D	0	0	0	0	0	0	0	0	0	0	0	0	0	0	0	0	0	0	0	0	0	0	0	0	0	0
BnaA01g11350D	0.514969	1.56057	0.710581	2.56284	3.10935	1.01374	1.7296	0.610554	0.142391	0.294543	0.238978	0.995429	1.01102	1.18233	0.665865	1.00898	1.01435	1.02439	1.24186	1.1246	1.389	0.815791	0.960517	0.143681	0.79433	0.662242
BnaA01g11360D	1.44764	1.1752	1.64228	0.896076	0.379334	0.939919	0.862053	1.09355	0.702097	0.857049	0.607443	0.435739	0.72497	1.1087	0.848482	0.581303	0.876838	0.889627	2.16099	1.64273	0.315195	0.610912	0.271144	1.66033	0.875335	1.32502
BnaA01g11370D	0.140741	0.097823	0.060201	0.047287	0.066243	0.230416	0.431555	0.151996	0.105595	0.18943	0.198433	0.687952	0.453563	0.211094	0.060235	0.075263	0	0.260767	0.183214	0.14752	0.284482	0.286477	0.157231	0.110977	0	0.038479
BnaA01g11380D	0.464348	0.176058	0.389485	0.143843	0.150006	0.498616	0.378018	0.374917	0.112668	0.051935	0.067873	0.039551	0	0.02754	0.256371	0.275554	0.179841	0	0.197314	0.128289	0.177381	0.012458	0.242205	0.400863	0.136354	0.198177
BnaA01g11390D	1.05592	0.517671	0	1.62125	5.54669	0.763063	0.630753	0.4564	0.497668	1.04562	0.790324	0.790787	1.66522	0	0.262374	0.574785	0.697553	1.34799	0.59016	0	0	1.13296	0	0.386209	0.897276	0
BnaA01g11400D	2.54208	3.2204	2.66894	8.87156	25.6918	4.62328	4.47706	10.471	6.88791	7.7412	3.52038	17.4709	17.5053	13.5604	1.77456	4.5727	2.43212	2.22183	7.33315	4.05978	6.85125	3.0721	2.59282	2.53532	3.15847	2.70689
BnaA01g11410D	0.170862	0	0.023748	0.046329	0.100096	0	0.099048	0.055395	0.46541	0.173114	0.199776	0.284925	0.296697	0.371224	0.092599	0.221448	0.04883	0.041158	0.048352	0.041328	0.048667	0.172308	0	0	0.04216	0
BnaA01g11420D	0	0	0	0	0	0	0	0	0	0	0	0	0	0	0	0	1.04124	0.753618	0.924287	0	0	0	0	0	0	0
BnaA01g11430D	0.03332	0.205713	0.206891	0.048301	0.042797	0.859901	0.053358	0.057418	0.027196	0.022661	0.471683	0.005015	0.030914	0.042823	0.049522	0.047301	0.635594	0.005228	0.34506	0.126204	0.406605	0.030579	0.331106	0.254571	0.120771	0.022203
BnaA01g11440D	0.007621	0.070044	0.020055	0.014199	0.004019	0.009649	0.033741	0.019995	0.00348	0.003055	0.012981	0.0021	0.001955	0.123693	0.037635	0.001507	0.007204	0.001089	0.058275	0.062551	0.070671	0.015837	0.00736	0.007843	0.014874	0.003888
BnaA01g11450D	0.141557	0.052155	0	0	0	0	0.058916	0	0	0	0	0.085764	0	0.059518	0.055558	0	0	0.171793	0	0.088023	0	0.313968	0.116017	0.057079	0	0.221621
BnaA01g11460D	0	0	0	0	0	0	0	0	0	0	0	0	0	0	0	0	0	0	0	0	0	0	0	0	0	0
BnaA01g11470D	0	0	0	0	0	0	0	0	0	0	0	0	0	0	0	0	0	0	0	0	0	0	0	0	0	0
BnaA01g11480D	0.140059	0.075556	0.093277	0	0.175251	0.025867	0.257369	0.181223	0.134225	0.126501	0.089285	0.025635	0.024932	0.185524	0.111096	0.087729	0.22774	0.130807	0.144969	0.07762	0.15231	0.216964	0.136125	0	0.036185	0.063896
BnaA01g11490D	1.32912	0.664276	1.28289	2.00705	0.968081	0.295017	1.22515	1.52229	1.56435	0.507	1.58703	1.75166	5.34731	3.64768	0.051195	1.73216	0.791713	1.04253	2.03168	0.894331	0.576948	0.903666	1.10401	2.2962	0.541852	1.05733
BnaA01g11500D	0.02213	0.099064	0.041066	0	0.022929	0.085534	0.022995	0.025522	0.021589	0.067196	0.056985	0.218257	0.162986	0.103269	0	0.067736	0	0.055965	0.022226	0.045732	0.021999	0.07917	0.037684	0.095796	0.213969	0.043403
BnaA01g11510D	0	0	0	0	0	0.225379	0.960304	0.056731	0	0	0.057144	0.242726	0.202306	0.092934	0	0	0.028479	0	0	0	0	0	0	0	0	0.030631
BnaA01g11520D	0	0	0	0	0	0	0	0	0	0	0	0	0	0	0	0	0	0	0	0	0	0	0	0	0	0
BnaA01g11530D	2.03911	0	2.68981	2.59551	0	2.8708	5.573	0	0	4.50566	0	0	3.55033	5.50176	0	2.62679	0	2.48451	0	0	0	0	0	2.57294	3.08407	2.9366
BnaA01g11540D	0.643852	0.425058	0.514738	0.226399	0.241786	0.979575	0.797643	0.619258	0.155684	0.53491	0.320775	0.149705	0.800539	0.532533	0.322534	0.900652	0.319866	0.626469	0.97122	0.667276	0.508889	0.697292	0.714797	0.65853	0.553705	0.912417
BnaA01g11550D	1.5119	1.84619	1.66898	1.99269	3.42074	2.65679	4.22492	2.48803	3.56986	3.74739	3.99444	6.69969	10.546	1.72406	5.38672	3.16109	3.22963	4.01067	4.16301	5.07883	0.84531	2.15809	1.59703	2.13347	2.36916	2.48842
BnaA01g11560D	0	0	0	0.101386	0	0	0	0	0	0	0	0	0	0	0	0	0	0	0	0	0	0.052887	0	0	0	0
BnaA01g11570D	0	0	0	0	0	0	0	0	0	0	0	0	0	0	0	0	0	0	0	0	0	0	0	0	0	0
BnaA01g11580D	1.62913	1.76066	0.917224	0.038049	0.184607	0.213149	0.140643	0.103913	1.54746	1.23752	1.76616	0.721296	1.22392	0.58026	0.369674	0.267564	0.482855	0.431785	0.285077	0.215922	0.845114	0.639017	0.406757	0.127038	0.457876	0.220867
BnaA01g11590D	0.030022	0	0.050787	0	0	0	0	0	0	0.039793	0	0	0	0	0.281379	0.223645	0.152105	0	0	0	0	0	0	0	0	0
BnaA01g11600D	5.10438	6.54058	5.8783	3.91778	3.19758	2.1332	3.30732	3.42466	2.84179	3.95723	2.3098	1.38998	3.56349	2.84707	4.01615	3.44287	5.58422	4.76746	4.47476	4.77313	2.14561	3.16499	2.21046	9.14683	6.14483	6.06704
BnaA01g11610D	0	0.490354	0	0	0	0	0	0.419419	0.316268	0.166569	0	0.139597	0.140924	0	0	0.166279	0	0	0.400416	0	0	0	0	0.304841	0	0
BnaA01g11620D	0.429576	0.283323	0.5956	0.623531	0.170847	1.77201	1.38819	1.63975	0.08799	0.3091	0.189249	0.026347	1.05991	0.380955	0.319062	0.130428	0.257349	0.562905	0.333381	0.532832	0.682481	1.00051	1.01267	1.65996	0.355231	0.617511
BnaA01g11630D	0.023074	0.968898	0.000176	1.14951	0.119804	0.012166	0.009259	0.077432	0.006416	0.076113	0.720441	0.842808	0.160857	1.48624	0.000449	0.027383	1.57938	0.611561	0	0.078253	0.141756	0.322595	0.086578	0.135375	0	0.003838
BnaA01g11640D	6.90602	6.35981	6.47633	8.293	8.9523	14.402	19.0754	10.1801	5.47151	4.76244	6.98883	12.4782	10.2328	11.8298	8.68745	8.29811	7.11237	14.8062	13.0461	15.354	14.7499	14.7669	14.5383	10.3635	12.8812	11.1927
BnaA01g11650D	0.027937	0.036862	0	0.044453	0.023105	0	0.069464	0.043734	0.014985	0.015127	0	0	0.01238	0	0	0.140713	0.07628	0.015234	0.029879	0	0	0.015317	0.04563	0.092238	0.045541	0.132074
BnaA01g11660D	25.4833	24.3402	22.9182	22.4699	20.3733	25.7568	26.122	24.5099	11.3156	12.8341	8.24207	6.31182	6.4246	8.25576	20.001	20.3912	24.893	23.9516	22.1735	19.3172	20.5953	15.711	15.5599	29.5934	24.9814	22.908
BnaA01g11670D	2.93236	3.44317	2.79449	1.4471	1.66878	1.16322	0.823307	0.793107	1.91007	3.04821	1.9777	1.88562	0.766463	1.0007	3.28034	3.00642	3.23791	2.78826	2.42739	3.01563	1.2918	1.04533	0.951318	1.68584	2.98816	3.40733
BnaA01g11680D	0.39525	0.160032	0.304341	0.179204	0	0.174929	0.141359	0.104548	0.04581	0.436692	0.093486	1.54449	1.35839	1.58232	0.044632	0.249209	0.046786	0.19739	0.353165	0.270832	0.06876	0.046824	0	0.110523	0.179594	0.174982
BnaA01g11690D	0.144067	0.127442	0.081145	0.104836	0	0	0	0.066673	0.064755	0.063668	0	0.118052	0.095503	0.135674	0.028816	0.104638	0.053683	0.082796	0.137098	0.133609	0	0	0	0.16956	0.035567	0.087144
BnaA01g11700D	0.29896	0.44891	0.137511	0.069155	0	0.050217	0.142667	0	0.901477	0.070519	0.530362	0.689965	0.88201	0.208742	0.034259	0.90451	0.10687	0.666169	0.836096	2.30142	0.069514	0.414048	0.847557	0.031208	0	0.249276
BnaA01g11710D	0	0	0.035279	0	0	0.054336	0.055366	0.081743	0	0	0	0	0	0.018769	0	0	0	0	0	0	0	0	0	0	0	0
BnaA01g11720D	0.017729	0.115714	0	0	0	0.085178	0.013632	0.026866	0.035186	0	0	0	0.119954	0.004606	0	0.035695	0	0.071542	0	0.108627	0	0	0.071587	0	0	0.016911
BnaA01g11730D	0	0	0	0	0	0.053649	0.039111	0.051348	0	0	0	0	0	0.013234	0	0	0	0	0	0	0	0	0.068562	0	0	0.047657
BnaA01g11740D	0.357085	0.297656	0.234195	0.227173	0.059668	0.36477	0.495487	0.43073	0.390622	0.336176	0.19491	0.815012	1.06486	1.07988	0.532358	0.47635	0.128275	0.33944	0.698496	0.726827	0.722201	0.342954	0.178183	0.128124	0.602475	0.387881
BnaA01g11750D	0	0	0	0	0	0	0	0	0	0	0	0	0	0	0	0	0	0	0	0	0	0	0	0	0	0
BnaA01g11760D	1.3389	0.275797	0.623546	12.7048	24.8558	75.8073	51.5177	47.5025	2.53386	2.22621	0.351248	40.6499	45.1173	124.143	4.72544	3.31121	2.56148	41.1203	19.0983	27.8817	52.3046	29.3417	36.5063	8.43845	13.7034	11.3751
BnaA01g11770D	8.20104	12.8461	7.05672	39.7008	37.6882	9.45619	8.76628	6.29005	8.23976	10.276	6.80664	10.2389	11.1533	15.4344	14.3114	9.99054	21.1535	62.3988	69.9986	75.2185	9.06323	23.1242	7.87479	37.3481	31.8734	36.7411
BnaA01g11780D	0	0.029718	0	0	0.009822	0	0	0	0	0	0	0	0	0	0	0.060161	0	0.030501	0	0	0	0	0	0	0.015196	0
BnaA01g11790D	0	0	0	0	0	0	0	0	0	0	0	0	0	0	0	0	0	0	0	0	0	0	0	0	0	0
BnaA01g11800D	141.557	109.759	107.191	126.057	127.917	32.9828	50.166	223.564	55.5546	55.4049	27.1087	30.944	11.6006	18.2218	226.151	597.284	468.095	429.972	1116.86	457.438	75.4094	241.222	111.392	1892.3	1387.7	1275.37
BnaA01g11810D	0	0	0	0	0	0	0	0	0	0	0	0	0	0	0	0	0	0	0	0	0	0	0	0.093518	0	0
BnaA01g11820D	0	0	0	0	0	0	0.128416	0.207524	0	0	0.126611	0	0	0	0	0	0	0	0	0	0	0	0	0.411436	0.062955	0.435782
BnaA01g11830D	1.32192	0.986785	1.11844	1.33653	1.98345	2.44735	1.84998	1.40008	0.594772	1.08354	0.750736	0.687925	0.703181	0.68017	0.96875	1.31304	1.986	1.32411	0.942293	1.57246	2.33687	2.25078	2.30932	1.48394	1.46032	1.35798
BnaA01g11840D	33.249	29.3626	16.8124	2.16679	10.3662	3.81122	1.00388	2.09361	101.363	310.448	174.776	13.0321	17.0411	14.2971	5.79523	7.77184	10.0953	31.9869	42.152	32.9999	10.5017	8.57255	4.76751	22.6171	22.2672	21.1244
BnaA01g11850D	0.457407	0.524339	0.523166	0.300568	0.368681	0.966899	0.932963	1.05467	0.402616	0.260309	0.40811	1.33907	0.944584	1.03392	0.626904	0.661438	0.557615	0.830447	0.876952	1.1857	0.838939	1.01779	0.599827	1.42682	0.852313	0.771543
BnaA01g11860D	0.005011	0.004725	0.005241	0.005573	0.005238	0.036638	0.006731	0.030886	0.004569	0.004365	0.005432	0.004793	0.006566	0.0553	0.005732	0.004886	0.00476	0.004918	0.005191	0.005243	0.005856	0.065735	0.005187	0.005034	0.00518	0.005603
BnaA01g11870D	2.08207	3.61956	1.27778	0.274365	0.678329	0.205829	0.415759	0.356409	3.37745	8.91243	8.88326	0.771209	0.95155	0.553124	4.90459	6.13166	4.2122	0.506389	0.314144	0.361173	0.602706	1.43424	1.06838	1.1075	0.850133	0.530033
BnaA01g11880D	0	0	0	0.033816	0	0.045028	0.137181	0	1.12129	0.71414	2.20613	1.12796	0.345971	0.74473	0	0	0	0	0	0	0.177248	0	0.427893	0	0	0
BnaA01g11890D	0	0	0	0	0	0	0	0	0	0	0	0	0	0	0	0	0	0	0	0	0	0	0	0	0	0
BnaA01g11900D	0	0	0	0	0	0	0	0	0	0	0	0	0	0	0	0	0	0	0	0	0	0	0	0	0	0
BnaA01g11910D	0	0.101747	0.217234	0.073225	0	0	0	0	0.331647	0.06831	0.290502	0	0	0	0.069067	0.539578	0.096717	0	0.34133	0	0.165409	0.139791	0.184373	0	0	0.109094
BnaA01g11920D	0.08726	0.205018	0.186672	0.023568	0.024444	0.061215	0	0.004716	0.041885	0.072097	0.054873	0.062289	0.04971	0.024932	0	0.171717	0.133598	0.048407	0.167552	0.024499	0.051483	0.024334	0	0.172521	0.035161	0.098782
BnaA01g11930D	0.729727	0.529626	0.450488	0.12274	0.114904	0.046451	0.188033	0.175623	0.894263	0.913217	0.420141	1.00442	1.04302	0.863299	0.156388	0.148118	0.646428	1.57606	2.10075	1.31245	0.066857	0.046486	0.229936	0.908508	0.637495	0.585574
BnaA01g11940D	3.33386	3.06975	2.4353	1.80427	1.81421	3.24465	3.5541	3.3209	3.10124	2.34177	1.78292	4.50423	3.31086	5.67886	2.14816	2.20892	1.96204	4.22399	4.73978	3.35195	1.95127	3.22435	2.48372	3.77706	3.50056	4.00371
BnaA01g11950D	3.72603	3.84368	3.4211	3.52382	2.72334	4.58197	3.44641	2.56061	4.51781	3.5193	3.10913	11.8913	9.66102	13.1356	3.66513	5.12256	4.29187	9.0312	7.67366	7.95253	5.06395	4.16466	6.73078	3.39007	3.80188	3.69261
BnaA01g11960D	2.67057	1.53317	1.27503	0.890394	0.566226	0.352408	0.3016	0.404402	1.07106	1.33407	0.473493	0.087324	0	0.161806	0.747133	1.59238	1.07486	0.123013	1.48003	0.445203	0.44661	0.767561	0.475191	0.757317	0.756766	1.65781
BnaA01g11970D	0	0	0	0	0	0	0	0	0	0	0	0	0	0	0	0	0	0	0	0	0	0	0	0	0	0
BnaA01g11980D	0	0	0	0	0	0	0	0	0	0	0	0	0	0	0	0	0	0	0	0	0	0	0	0	0	0
BnaA01g11990D	0	0.028328	0	0	0	0	0	0	0	0	0	0	0	0	0	0	0	0	0	0	0	0	0	0	0	0
BnaA01g12000D	0	0	0	0	0	0	0	0	0	0	0	0	0	0	0	0	0	0	0	0	0	0	0	0	0	0
BnaA01g12010D	20.775	22.0429	24.6355	16.0673	12.7021	6.51473	8.29798	4.60456	34.068	24.0707	28.0323	5.01652	4.87578	5.68607	19.657	20.0894	18.8739	10.8396	19.2521	16.9696	15.252	17.7263	12.1313	23.6103	28.2043	23.9712
BnaA01g12020D	21.4907	20.6672	21.7336	14.1881	13.1438	3.07382	3.68588	3.25291	21.9271	19.7966	13.4508	11.4048	11.8678	10.9491	9.25493	5.21462	16.3714	28.2841	29.9446	31.6588	8.23856	13.7485	6.62541	32.6892	28.6965	30.1375
BnaA01g12030D	0	0	0	0.039934	0	0	0	0	0	0.063361	0.061332	0	0	0	0	0	0	0	0	0	0	0	0	0	0	0
BnaA01g12040D	8.10196	7.45632	7.50192	8.31437	8.1175	10.6687	11.9052	10.4884	9.86378	6.16073	5.62749	7.42547	8.29752	10.6112	8.51969	8.22323	5.86386	9.07	8.89923	10.1658	8.37976	8.27419	9.36065	9.79353	11.0523	9.71056
BnaA01g12050D	0	0	0	0	0	0	0	0	0	0	0	0	0	0	0	0	0	0	0	0	0	0	0	0	0	0
BnaA01g12060D	30.8599	25.7703	32.9847	33.9771	35.7443	161.638	122.525	201.87	26.6037	23.9084	16.1537	95.818	92.3721	101.235	33.4611	31.6259	24.1413	33.5704	45.0558	38.9507	61.9818	48.7159	48.8495	39.1304	33.4416	36.3493
BnaA01g12070D	0.169512	0	0	0.141433	0.283048	0	0	0.05843	0	0.09245	0	0	0	0.095909	0.057789	0.092908	0.166943	0	0.234739	0	0.155355	0.174428	0	0.235334	0.184934	0.285002
BnaA01g12080D	3.39794	3.38258	3.81133	4.39165	4.35471	51.5007	38.94	47.8005	5.42491	4.01874	3.33769	25.1787	26.2352	28.9425	12.0847	14.6499	7.32536	9.08952	7.54763	11.9573	23.2366	14.7853	27.6158	3.81991	5.90131	5.45818
BnaA01g12090D	5.60784	2.95781	5.81403	23.2551	34.7911	30.1056	34.4509	30.4048	17.7303	14.7498	13.2816	128.011	119.061	112.333	29.0412	21.6239	18.8033	56.9252	34.742	49.7747	19.6225	19.761	20.0445	21.1124	19.585	20.8269
BnaA01g12100D	3.50351	3.83499	3.8721	0.92639	0.790106	1.04516	1.31059	2.05646	1.46344	1.70995	1.89231	0.821107	0.928621	0.899042	1.62079	2.65138	2.99916	2.62327	5.08886	4.29413	1.30156	1.50339	0.838129	5.81751	4.83575	4.46798
BnaA01g12110D	0.720618	0.893164	0.525183	0.714138	0.372056	1.11394	0.122201	1.31691	0.716587	0.364567	0.571275	1.00026	0.652437	0.565107	1.28377	2.08894	2.48933	1.08741	2.16811	1.42529	1.05974	0.457125	0.539142	2.37736	2.44177	1.60527
BnaA01g12120D	0.463382	0.502971	0.429688	0.172465	0.472957	1.68654	1.97761	0.738437	0.973217	0.630625	0.327717	0.305503	0.302444	0.57777	1.17667	2.57424	0.89027	0.311475	0.692221	0.453381	0.993668	0.699428	1.26011	0.406442	0.563678	0.195538
BnaA01g12130D	0.135719	0.079271	0.095963	0	0.070025	0.154926	0.177029	0.147168	0.134024	0.156809	0.206234	0.262276	0.611813	0.659912	0.23903	0.123108	0.073832	0.174048	0.067697	0.027979	0.124473	0.295724	0.383973	0.229777	0.160055	0.154824
BnaA01g12140D	0.644763	1.22324	0.969671	0.463537	0.425587	1.55754	0.473704	1.01819	2.43526	1.81404	2.26551	1.36876	1.60013	1.36456	0.906186	1.09592	0.874748	1.55187	0.844613	0.602166	1.40844	1.25628	1.72333	2.18624	1.30576	0.971242
BnaA01g12150D	0.676533	1.00454	1.07824	1.0419	0.305746	0.483625	1.28315	0.357441	0.873842	0.867384	0.688	0.495603	0.471325	0.468221	1.72785	1.01285	0.315921	0.698439	0.815459	1.28761	0.380617	1.17499	1.44621	0.561654	1.25729	2.20135
BnaA01g12160D	0	0	0	0	0	0.349838	0	0	0	0	0	0	0	0	0	0	0	0	0	0	0	0	0	0	0.516549	0
BnaA01g12170D	0.745427	0.589555	1.14505	0.504277	0.61274	2.09145	1.48286	3.18637	0.749237	0.82351	1.13813	0.315026	0.556318	0.711845	0.874068	1.15573	1.01862	0.395699	1.0122	0.298552	0.871083	0.531587	0.703554	1.72397	1.20436	0.913752
BnaA01g12180D	0.271022	0.303085	0.081445	0	0	0.373447	0.368337	0.239885	0.060255	0	0.346954	0	0.332093	0.256317	0.039208	0.10754	0.307951	0	0.115253	0.062007	0.22384	0	0	0	0.075244	0.148774
BnaA01g12190D	8.44271	10.321	4.25281	2.96223	5.29941	4.33936	3.74893	5.13557	13.1446	12.5026	5.88944	24.86	27.0191	30.4277	4.71016	6.64438	4.84837	11.5977	11.5024	11.2127	4.28253	6.3409	3.54123	8.91233	9.22353	12.2519
BnaA01g12200D	9.79945	11.872	10.5668	14.9033	12.0861	32.8396	31.387	30.9807	10.0697	10.1304	10.8858	6.16539	5.44408	7.71451	17.3818	14.7029	13.6739	15.5844	22.6291	17.8982	18.4945	21.3249	18.5913	24.0249	26.2474	25.4019
BnaA01g12210D	0.541265	0.693312	1.12138	0.952944	0.388178	1.39409	1.86466	3.64983	0.344231	0.90513	0.443068	0.082336	0.496133	0.072756	0.638179	1.65388	0.567998	0.707547	2.99963	1.42329	0.683209	2.32864	0.247432	1.89389	1.47236	1.29692
BnaA01g12220D	0	0	0	0	0.062084	0	0	0	0	0	0	0	0	0	0	0	0	0	0	0.037444	0	0	0	0	0	0
BnaA01g12230D	0	0	0	0	0	0	0	0	0	0	0	0	0	0	0	0	0	0	0	0	0	0	0	0	0	0
BnaA01g12240D	0	0	0	0	0	0	0	0	0	0	0	0	0	0	0	0	0	0	0	0	0	0	0	0	0	0
BnaA01g12250D	0	0	0	0	0	0	0	0	0	0	0	0	0	0	0	0	0	0	0	0	0	0	0	0	0	0
BnaA01g12260D	0	0	0	0	0	0	0	0	0	0	0	0	0	0	0	0	0	0	0	0	0	0	0	0	0	0
BnaA01g12270D	0.660602	0.541874	0.771195	2.56013	2.58778	1.01446	1.50675	1.64347	2.2414	1.05572	2.90888	3.15489	2.81061	1.3301	1.21833	1.71754	1.26328	0.383851	0.834995	0.435899	2.06485	1.18772	1.6867	0.888866	0.788702	0.611435
BnaA01g12280D	0.214091	0.863084	2.70953	0.105735	0	1.77221	0	0.329465	1.16723	1.60625	0.242119	0.26984	0.193236	0.290398	0.920743	0.102728	0	0.062259	0.425007	1.05045	2.04521	0.18856	2.78458	0.167065	0.284565	1.28265
BnaA01g12290D	0	0	0	0	0	0	0	0	0	0	0	0	0	0	0	0	0	0	0	0	0	0	0	0	0	0
BnaA01g12300D	0	0	0	0	0	0	0	0	0	0	0	0	0	0	0	0	0	0	0	0	0	0	0	0	0	0
BnaA01g12310D	7.74798	7.18683	5.19174	1.23537	1.19763	1.10929	1.09806	1.23814	6.69197	9.31832	6.7627	2.11094	3.6875	3.12751	2.16861	3.35225	1.86305	3.74953	6.6167	5.10031	1.32751	2.09743	1.55121	5.73835	5.31399	4.85774
BnaA01g12320D	2.30174	1.92883	2.52293	1.4713	1.49067	0.39747	1.78212	0.272828	3.96078	5.76357	6.10299	5.16187	5.89783	5.07706	0.944687	0.867383	1.65732	4.59415	1.59645	1.75355	0.470741	0.712961	1.43867	0.931452	0.684545	0.703095
BnaA01g12330D	0.035071	0	0	0	0	0	0	0	0	0	0	0	0.036152	0	0	0	0	0	0	0	0	0	0	0	0	0
BnaA01g12340D	4.83942	5.28929	2.89211	5.97895	5.19917	0.129153	2.01499	0	3.38828	11.2579	6.86726	6.89328	6.27235	2.08031	0.310034	0.597736	0.643887	0.215578	0.423512	0.346526	0.581191	0.630289	0.215136	0.042451	0.085924	0.260141
BnaA01g12350D	0.082658	0	0	0	0	0	0	0	0	0	0	0	0	0	0	0	0	0	0	0	0	0	0	0	0	0
BnaA01g12360D	9.64196	11.7751	7.98424	18.2792	17.0354	35.7572	37.3918	34.6803	6.83222	7.23991	5.46105	9.31263	5.70517	9.52995	15.7121	12.937	14.2589	31.1846	30.1982	29.8547	20.5816	28.8696	28.8598	20.0111	27.5932	28.7777
BnaA01g12370D	0	0	0	0	0	0	0	0	0	0	0	0	0	0	0	0	0	0	0	0	0	0	0	0	0	0
BnaA01g12380D	0	0	0	0	0	0	0	0	0	0	0	0	0	0	0	0	0	0	0	0	0	0	0	0	0	0
BnaA01g12390D	0.111332	0	0	0.080536	0.891337	0	0	0	0	0	0	0	0.031049	0.078651	0	0	0	0	0	0	0	0	0	0	0	0
BnaA01g12400D	1.72706	1.86188	1.4095	0.562697	0.709964	3.98535	2.69835	3.76636	0.828104	1.42936	0.968412	0.750895	1.20101	1.46467	1.38608	1.43629	1.72712	3.05609	2.76619	2.24002	1.67449	2.10198	1.86801	2.33433	2.14454	2.10063
BnaA01g12410D	0	0	0	0	0	0	0	0	0	0	0	0	0	0	0	0	0	0	0	0	0	0	0	0	0	0
BnaA01g12420D	0	0	0	0	0	0	0	0	0	0	0	0	0	0	0	0	0	0	0	0	0	0	0	0	0	0
BnaA01g12430D	0.563313	0.440803	0.755687	0.830162	0.813455	0.259367	0.560185	0	0	0.263917	0.153506	0.395016	0.53429	0.338277	0.604143	0.371391	0.286738	1.01625	0.572566	0.855817	0.636273	0.353971	0.304436	0.194809	0.82286	0.29061
BnaA01g12440D	0.099492	0	0	0	0	0.113468	0	0	0.095888	0.071115	0.050935	0.3204	0.305371	0.168639	0	0	0	0	0.127084	0.331052	0	0	0	0	0.034937	0.105119
BnaA01g12450D	2.32571	1.92423	1.45023	2.30796	2.5975	1.62301	1.23456	2.51125	1.83005	2.393	1.97794	1.72802	1.79689	0.984649	2.66625	3.37126	2.91925	4.10719	6.01724	4.15911	0.609072	0.927137	1.17579	2.2587	2.02373	3.72605
BnaA01g12460D	1.84321	0	1.36417	1.99045	2.49867	0.797165	1.03603	0.570856	14.1275	9.26563	12.6336	7.82179	3.72242	6.04541	0.888781	0.985722	1.87342	3.17746	4.09052	3.54468	0	1.65333	1.04165	2.48089	1.65958	2.34781
BnaA01g12470D	0.919654	0.622969	0.73482	0.232044	0.437054	1.17913	0.711735	1.01303	0.878625	1.22234	0.831863	1.02063	0.530704	0.759657	0.596338	0.731603	0.538995	1.23782	1.32596	0.93508	0.413585	0.839174	0.38304	1.18677	0.746892	1.63321
BnaA01g12480D	0.081525	0.251439	0.422505	0.101164	0.103133	0.424569	0.230941	0.480116	0.82713	1.70667	0.182915	0.398039	0.285238	0.523836	0.389066	0.166878	0.248418	0.51064	0.22671	0.477185	0.201645	0.127874	0.293036	0.337026	0.625131	0.752776
BnaA01g12490D	0	0.063841	0.063009	0.030594	0	0.07049	0.364365	0.163022	0.355919	0.451284	0.536023	0.06498	0.331941	0.117859	0	0	0	0.024612	0.126596	0	0.15243	0.175736	0.15325	0.243839	0	0.226735
BnaA01g12500D	0	0	0	0	0	0	0	0	0	0	0	0	0	0	0	0	0	0	0	0	0	0	0	0	0	0
BnaA01g12510D	9.80993	13.0343	10.8908	10.044	7.91253	6.2265	7.78221	8.61137	7.89207	8.0594	6.49107	2.9619	2.70067	4.6864	10.0309	7.31928	12.6565	5.3507	5.6569	4.8747	7.92072	6.75274	4.63501	8.66936	9.28681	11.7488
BnaA01g12520D	0.30015	0.334964	0.209309	0.05691	0.021231	0	0.054783	0	0.171408	0.438055	0.171634	0	0	0	0.039022	0	0	0.058691	0	0	0.093215	0	0.093536	0.175598	0.265351	0.441092
BnaA01g12530D	0.273176	0.515853	0.829008	0.223474	0.231942	0	0.108294	0	0.643661	0.273336	0.753033	0.068253	0	0	0.521269	1.25261	0.556629	0.045931	0.401239	0.232466	0.28996	0.046179	0.160552	0.578948	0.274301	0.185586
BnaA01g12540D	117.312	123.973	148.533	129.319	128.932	35.5171	78.1049	95.0122	149.99	96.7409	102.732	42.8674	33.0976	52.4546	220.578	175.234	135.15	63.8847	90.6146	77.3741	169.137	140.621	146.281	128.443	118.996	127.607
BnaA01g12550D	0	0	0	0	0	0	0	0	0	0	0	0	0	0	0	0	0.100578	0	0	0	0.279059	0	0	0	0	0
BnaA01g12560D	2.13335	2.95913	2.29109	1.23869	2.02579	2.17443	2.50555	1.45599	2.70459	5.03652	4.06055	3.53256	3.50595	3.34114	2.01212	2.6987	2.50192	2.0815	1.95019	2.19137	1.72365	1.26569	1.43681	2.8235	2.23482	1.76963
BnaA01g12570D	3.15061	2.77495	2.66555	10.5506	16.2566	16.6292	11.3101	10.6116	6.0242	5.78259	3.14478	8.8734	6.4838	12.2351	1.29578	1.7677	2.64801	12.9633	7.75493	10.7185	5.03193	3.02686	4.77095	4.53046	3.85007	5.42907
BnaA01g12580D	0	0	0	0.02802	0.02916	0.205267	0.296641	0.33439	0	0	0	0.084863	0	0.029349	0	0	0	0.083005	0.027986	0.01442	0.028074	0	0.049891	0	0.055691	0
BnaA01g12590D	1.21652	1.55515	0.836949	0.495581	0	0	0.052924	0	3.12095	2.74544	5.03642	0.055687	0.804485	0.488082	0.475077	0.510707	0.124553	0.366549	0.101517	0.65526	0.230063	0.09057	0.297892	0.89326	0.908881	0.81527
BnaA01g12600D	0.872136	1.35312	1.16494	0	1.21662	0	0	0.711325	0	0	0	0	0.605541	0	0	0.925691	0.848647	0	2.43167	1.82516	1.37866	0	1.52793	1.34535	1.58286	0
BnaA01g12610D	0	0	0	0	0	0	0	0	0	0	0	0	0	0	0	0	0	0	0	0	0	0	0	0	0	0
BnaA01g12620D	0	0	0	0	0	0	0	0	0	0	0	0	0	0	0	0	0	0	0	0	0	0	0	0	0	0
BnaA01g12630D	0	0	0	0	0	0	0	0	0	0	0	0	0	0	0	0	0	0	0	0	0	0	0	0	0	0
BnaA01g12640D	0	0	0	0	0	0	0	0	0	0	0	0	0	0	0	0	0	0	0	0	0	0	0	0	0	0.06078
BnaA01g12650D	0.836264	0.582845	0.856517	0.23203	0.377078	0.029086	0.087239	0.140659	1.60495	2.36144	3.53689	0	0.280117	0.377341	0.630681	0.34859	0.65557	0.343092	0.515702	0.34527	0.465126	1.05848	1.43553	0.502278	0.211723	0.391519
BnaA01g12660D	0.055118	0	0.031089	0	0	0	0	0	0.007177	0.165404	0.093567	0	0	0	0	0	0.000415	0.04077	0	0	0.001206	0	0.009558	0	0	0
BnaA01g12670D	0.557984	1.0243	0.251741	0.282898	0.134529	0	0	0	0.373751	0.631805	0.167034	0.06232	0	0.04232	0.612843	0.238304	0.17577	0.187046	0.344236	0.134562	0.338864	0.228747	0.223984	0	0.215633	0
BnaA01g12680D	0.480795	0.457576	0.751789	0.229312	0.299419	0	0.069798	0.34712	0.593899	0.419629	0.610728	0	0	0.09433	0.558065	0.470444	0.529103	0.22863	0.533632	0.713285	0.336423	0.175085	0.045815	0.577434	0.282261	0.579771
BnaA01g12690D	0	0	0	0	0	0.063379	0	0	0	0	0.086628	0.108558	0.026159	0	0	0	0.064481	0	0.097541	0	0	0	0.034409	0	0	0
BnaA01g12700D	0	0	0	0	0	0	0	0	0	0	0	0	0	0	0	0	0	0	0	0	0	0	0.113869	0	0	0
BnaA01g12710D	0	0	0	0	0	0	0	0	0	0	0	0	0	0	0	0	0	0	0	0	0	0	0	0	0	0
BnaA01g12720D	0	0	0	0	0	0	0	0	0	0	0	0	0	0	0	0	0	0	0	0	0	0	0	0	0	0
BnaA01g12730D	0	0	0	0	0	0	0	0	0	0	0	0.030936	0	0.024261	0.060356	0.053956	0	0	0.042048	0	0	0	0	0	0	0
BnaA01g12740D	0.300223	0.316002	0.389546	0.48465	0.408325	0.633315	0.741364	0.683958	0.253462	0.554455	0.365975	0.351489	0.281273	0.435492	0.270489	0.166315	0.311242	0.618757	0.571714	0.799503	0.861204	0.731336	1.0137	0.663062	0.458499	0.766468
BnaA01g12750D	0	0	0	0.036477	0.151077	0.113471	0.038198	0	0	0	0	0.037235	0.038792	0	0.072767	0	0	0	0	0	0	0.037537	0	0	0	0.038222
BnaA01g12760D	0	0	0	0	0	0	0	0	0	0	0	0	0	0	0	0	0	0	0	0	0	0	0	0	0	0
BnaA01g12770D	0	0	0	0	0	0	0	0	0	0	0	0	0	0	0	0	0	0	0	0	0	0	0	0	0	0
BnaA01g12780D	0	0	0	0	0	0	0	0	0	0	0	0	0	0	0	0	0	0	0	0	0	0	0	0	0	0
BnaA01g12790D	0.133395	0.123731	0.128472	0.212987	0.327279	0.240589	0.14273	0.242251	0.247826	0.282831	0.299281	0.371932	0.082397	0.378678	1.32577	1.5335	1.47426	0.79846	1.24313	1.35343	0.886965	0.762185	0.708809	0.520791	0.926623	0.88297
BnaA01g12800D	2.16709	0.135807	0.156175	0.224207	1.04263	0.085821	0	0.117023	0.140045	0.049125	0	0	2.93043	0	0.910061	0.032274	1.09765	0	0	0	0.238666	0.624116	0.660777	0	0	0.336345
BnaA01g12810D	0.013053	0.045633	0	0	0	0	0	0	0.001552	0	0.03758	0.009248	0.053592	0	0	0.016101	0	0.025521	0.029308	0.011802	0	0.009975	0	0	0.000143	0
BnaA01g12820D	0	0	0.042172	0	0	0	0	0	0	0	0.036489	0	0	0	0	0	0	0	0	0	0	0	0	0	0	0.157343
BnaA01g12830D	0	0	0	0	0	0	0	0	0	0.11199	0	0	0.046407	0	0	0	0	0	0.044315	0	0	0	0	0	0	0
BnaA01g12840D	0.112552	0.073304	0.053983	0	0.037414	0.07609	0.069133	0	0.240165	0.394476	0.964737	0.166723	0.436366	0.146789	0.073193	0.113554	0	0	0.032292	0	0.074631	0	0.144993	0.049254	0.075596	0.019352
BnaA01g12850D	0	0	0	0	0	0	0	0	0	0	0	0	0	0	0	0	0	0	0	0	0	0	0	0	0	0
BnaA01g12860D	2.61388	2.53831	3.19652	1.67543	1.49692	1.68463	1.24126	2.11553	2.08666	1.90105	1.85914	0.450965	0.653407	0.84737	2.5779	3.55478	2.9638	3.82261	2.47172	3.28363	3.95971	3.55975	2.38739	2.16252	2.71702	3.04342
BnaA01g12870D	0	0.438248	0.278349	0.7147	0	0	0	0	0.700796	0	0	0.928813	0	0	0	0	0	0.196861	0	0	0.283147	0	0	0	0	0
BnaA01g12880D	0	0	0	0	0	0	0	0	0	0	0	0	0	0	0.105923	0.061428	0	0	0	0	0	0.123807	0	0	0	0
BnaA01g12890D	0	0	0	0	0	0	0	0	0	0	0.077091	0	0	0	0	0.06217	0.062642	0	0	0	0	0	0	0	0	0
BnaA01g12900D	38.5331	29.5749	33.0755	38.7998	46.1588	43.0975	37.7929	52.3154	34.9236	32.1421	26.4823	48.1854	45.1535	56.9407	36.6832	35.0336	44.4937	83.5044	68.9551	72.579	43.5105	45.1165	43.1854	37.6093	38.3843	33.5161
BnaA01g12910D	0.279111	0.109991	0.222856	0.083394	0.151474	0	0.027468	0	0.914918	0.906137	1.42173	0.029796	0.194765	0.092945	0.07979	0.121713	0.101477	0.140402	0.138395	0.245152	0.26564	0.419113	0.483858	0.328618	0.222268	0.181799
BnaA01g12920D	0.1053	0.252461	0.024766	0.012014	0.10269	0	0.159189	0.372642	0.829491	0.338846	0.453323	0	0.046237	0	0	0.023779	0	0.003687	0.13896	0.016441	0.059298	0.015671	0.010811	0.013545	2.11983	0.039807
BnaA01g12930D	6.02505	5.64454	5.68098	10.0703	9.63146	0.229228	1.15571	0.946537	41.1746	29.4383	53.2845	3.88017	4.39322	1.53443	8.77115	11.727	8.97643	2.41178	3.7099	2.96004	6.82953	7.87283	10.3915	3.59827	3.77072	3.81309
BnaA01g12940D	0.084109	0	0	0.137898	0.187314	0	0.02643	0	0.438187	0.869448	2.10984	0.134122	0.029743	0	0.261327	0.026212	0.095865	0	0	0.029268	0.054229	0.029071	0.193784	0	0	0
BnaA01g12950D	0	0.011055	0	0.045714	0.151675	0	0	0	0	0.021113	0.088392	0.014549	0	0	0.014169	0	0.014766	0	0.022956	0.043954	0	0.044297	0	0	0	0.014885
BnaA01g12960D	0	0	0	0.028281	0	0	0	0	0.113982	0.184412	0.581322	0	0.029876	0.0221	0	0	0	0	0	0.082394	0	0.098001	0.286913	0	0	0
BnaA01g12970D	0	0	0	0	0	0	0	0	0	0.021212	0	0.019383	0.039579	0	0	0	0	0	0	0	0	0	0.007703	0	0	0
BnaA01g12980D	0	0	0	0	0.031648	0	0	0.030857	0.245351	0.318079	0.514071	0.266527	0.088969	0.032279	0.042735	0	0	0	0	0	0.227405	0.219748	0.66624	0	0	0
BnaA01g12990D	0	0	0	0	0	0	0	0	0.15055	0.126785	0.454573	0	0.052538	0	0	0	0	0	0	0	0.054018	0.051351	0.254652	0	0	0
BnaA01g13000D	1.59611	1.15061	1.64627	0.994226	1.08274	1.57808	1.40316	3.18985	2.88575	4.1846	2.82817	1.11154	0.452103	0.43067	1.35613	1.84404	2.08938	0.83921	1.05397	0.818183	1.34344	1.18932	1.52935	2.6576	2.652	1.05842
BnaA01g13010D	0	0	0	0	0.011644	0	0	0	0	0	0	0	0	0	0	0	0	0	0.038409	0	0	0	0	0	0	0
BnaA01g13020D	0	0.02044	0.099597	0.037079	0	0.128364	0	0.0952	0.048409	0.050938	0	0.022644	0.026206	0	0.100665	0.050844	0.020577	0	0.306596	0	0	0.074532	0.038182	0	0	0.057634
BnaA01g13030D	0.110994	0.190257	0.218919	0.048799	0.050953	0.113471	0.031172	0	0.049295	0.343143	0.168675	0.11208	0.051723	0.081394	0.025629	0.237496	0	0	0.253306	0.081306	0.050208	0	0.246758	0	0	0.298285
BnaA01g13040D	0	0.016684	0	0	0	0	0	0	0	0.263403	0	0	0.16364	0	0	0	0	0	0	0	0	0	0	0.144855	0	0.143975
BnaA01g13050D	0	0.020189	0.019993	0.020244	0	0.111347	0	0.113397	0	0.020643	0	0.079226	0.031722	0.085306	0	0.07254	0.020903	0.02079	0.133148	0.073866	0	0.010451	0.24915	0.020538	0.020716	0.10571
BnaA01g13060D	0.003979	0.056296	0	0.062095	0.029077	0.027532	0.068287	0.053085	0	0	0	0.037976	0.017632	0.040782	0.024722	0	0.155522	0.078874	0.280742	0.08754	0	0.079503	0.094823	0	0	0
BnaA01g13070D	0	0	0	0	0	0	0	0	0	0	0	0	0	0	0	0	0	0	0	0	0	0	0	0	0	0
BnaA01g13080D	0.576837	0.40232	0.393075	0.482487	0	0.508831	0.595614	0.445571	0.441651	0	0	0	0	0.842717	0	0	0.562661	0	0.952415	0.58249	0.764677	0.566965	0	0.558295	0.554367	0
BnaA01g13090D	0.622848	0.711879	0.35282	0.308277	0.501406	0.04553	0.14156	0.099679	0.531732	0.927572	0.297489	0.934522	1.56436	1.23567	0.301458	0.329468	0.733584	0.876627	1.10331	0.863898	0.276258	0.132863	0.176391	1.445	0.489427	0.44102
BnaA01g13100D	0	0.517743	0	0.28674	0.378999	0.102616	0.692636	0.002283	0	0.253459	0.591566	1.66998	0	0.517239	0	0	0	1.80227	1.39141	0.402836	0	0	0	0	0	0
BnaA01g13110D	0	0	0	0	0	0	0	0	0	0	0.17135	0	0	0	0	0	0	0	0	0	0	0	0	0	0	0
BnaA01g13120D	0	0.063413	0	0	0	0	0	0.016186	0.021339	0	0	0.128303	0.121298	0.055867	0	0	0	0	0	0.051536	0	0	0	0	0	0
BnaA01g13130D	0	0	0	0.125495	0.083588	0.303828	0.166906	0.440056	0	0	0.106175	0	0	0	0.05612	0	0.032408	0.077316	0	0.033019	0	0.029286	0.067953	0.288923	0	0.305448
BnaA01g13140D	0	0	0	0	0	0.182676	0.009758	0.305915	0	0	0	0	0.054413	0.073967	0.006777	0.003658	0	0	0	0.052516	0.00326	0.161595	0.088017	0	0.19388	0
BnaA01g13150D	0	0	0	0	0	0	0	0	0	0	0	0	0	0	0	0	0	0	0	0	0	0	0	0	0	0
BnaA01g13160D	0	0	0	0.030498	0	0.041239	0	0	0	0	0.133573	0.035394	0.089879	0.258247	0	0	0	0.053353	0	0.058395	0	0.056055	0	0	0	0
BnaA01g13170D	0	0	0	0	0	0.43362	0	0.065642	0.070205	0	0	0	0.268291	0	0	0.192175	0	0	0.108381	0	0.051998	0	0	0	0	0
BnaA01g13180D	0	0	0	0	0.03292	0.262448	0.284974	0.032424	0	0	0	0	0	0	0	0	0	0	0.02606	0	0	0	0	0.086109	0.059563	0.066294
BnaA01g13190D	0	0	0	0	0	0	0	0	0	0	0	0	0	0	0	0	0	0	0	0	0	0	0	0	0	0
BnaA01g13200D	0	0	0	0	0	0	0	0	0	0	0	0	0	0	0	0	0	0	0	0	0	0	0	0	0	0
BnaA01g13210D	1.08663	1.23015	0.690282	1.98326	2.311	2.83648	1.06486	1.73618	4.66699	5.63741	4.41029	8.66855	12.9898	6.21449	1.04155	1.11661	2.49079	7.14065	4.7301	7.95345	0.366943	0.150498	0.233326	2.25292	1.39858	1.40683
BnaA01g13220D	0	0	0	0	0	0	0	0	0	0	0	0	0	0	0	0	0	0	0	0	0	0	0	0	0	0
BnaA01g13230D	0	0	0	0	0	0	0	0	0	0	0	0	0.06515	0.130709	0	0	0	0.131041	0	0.132644	0	0	0	0	0	0
BnaA01g13240D	0	0	0	0	0	0	0	0	0	0	0	0	0	0	0	0	0	0	0	0	0	0	0	0	0	0
BnaA01g13250D	0	0	0	0.158785	0	0	0	0	0.080022	0.107405	0	0	0	0.028714	0	0.08583	0.056197	0	0	0	0.128981	0.27325	0.203204	0	0	0
BnaA01g13260D	0	0	0	0	0	0	0	0	0	0	0	0	0	0	0	0	0	0	0	0	0	0	0	0	0	0
BnaA01g13270D	0	0	0	0	0	0	0	0	0	0	0	0.041762	0.023856	0	0	0.013467	0	0	0	0	0	0.052591	0	0	0.060731	0
BnaA01g13280D	12.823	17.8325	14.7992	94.1965	496.301	62.0753	30.0909	94.6538	37.2185	78.2841	21.1219	25.6487	54.2754	101.194	4.78043	22.373	9.6325	43.1203	141.218	87.1345	418.308	57.4926	44.0015	14.1462	11.7217	12.0191
BnaA01g13290D	0.380963	0.975668	0.713529	0.7203	1.75116	0.162642	0.231819	0.121794	1.00278	1.151	1.80804	3.37923	2.69755	2.07829	0.206514	2.14135	0.507607	0.387839	1.34412	1.25764	1.32439	1.76571	2.52265	0.556141	0.500376	0.540226
BnaA01g13300D	1.7934	2.65844	1.66423	1.1308	1.12254	0.67959	0.600125	0.554981	1.61288	1.09372	0.54255	1.45454	2.47694	2.85524	0.868506	1.59698	0.468447	0.798154	2.88233	1.4628	0.071044	0.335776	0.102499	1.5256	1.16437	1.95624
BnaA01g13310D	24.2114	20.6359	29.3903	133.967	143.137	91.5995	110.415	91.6976	41.5725	45.0274	31.8546	125.965	123.824	133.605	53.8379	48.6659	47.6054	93.0894	98.451	93.7546	55.2046	85.5711	56.861	73.845	64.4194	64.3162
BnaA01g13320D	0.099758	0.10788	1.97662	0.090851	0.188864	0.06403	0.436186	0.094638	1.44702	0.143342	0.3587	0.112986	1.38491	0.26617	0.045948	0.055965	0.081959	1.2998	0.111453	0.118606	0.048038	0.187731	0.169484	0.275639	0.057463	0.062217
BnaA01g13330D	3.79879	3.88037	3.97225	6.2263	4.85755	2.90496	3.65723	3.1101	5.40844	8.12489	9.18723	9.75589	10.092	5.83052	3.45348	4.37136	3.34035	2.91989	6.68533	3.67481	4.27631	4.17367	5.6146	4.06281	4.39624	4.02498
BnaA01g13340D	1.40293	1.36687	1.07989	0.443193	0.449804	1.71986	1.07398	1.43051	1.16489	1.75358	0.779091	0.630136	0.903259	1.03078	1.0352	1.10889	0.675743	1.85187	1.57993	1.57452	1.42351	0.519527	0.864932	1.37293	1.9625	1.70795
BnaA01g13350D	0.309669	0.473312	0.277045	0.174158	0.287327	0.921319	1.06902	0	0.069902	0.175461	0	0.558251	0.476137	0.801558	0.068792	0.210359	0	2.73745	1.23132	4.64221	0.070261	0.071929	0	1.23718	1.89269	2.09039
BnaA01g13360D	0.150126	0	0	0	0	0	0.085731	0	0	0	0.156359	0	0.167315	0	0	0	0	0.024355	0	0.047169	0	0	0.335526	0	0	0
BnaA01g13370D	0.144752	0.2589	0.287899	0.145757	0.050561	0.349972	0.304078	0.682639	0	0	0	0.201891	0	0	0.370184	0.995032	0.486453	0.141225	0.17007	0.07576	0.294997	0.348529	0.243982	0.215797	0.273452	0.268638
BnaA01g13380D	0	0	0	0	0	0	0	0	0	0	0	0	0	0	0	0	0	0	0	0	0	0	0	0	0	0
BnaA01g13390D	14.767	15.3591	14.8356	15.0725	13.6333	3.31867	8.78179	6.201	6.48726	8.51017	12.1139	19.3114	14.4613	18.6935	9.29495	5.69475	7.81381	19.9331	13.4826	18.4389	14.8735	6.25887	14.7017	8.09403	3.3191	10.0433
BnaA01g13400D	5.74039	5.95879	6.68371	3.09688	2.84749	4.61028	4.56257	4.92875	3.4375	5.97147	4.85806	1.97911	2.86575	3.03851	4.29493	3.8039	4.16261	5.36614	6.46624	6.10647	5.38137	6.46221	6.18623	8.3172	7.43106	7.89611
BnaA01g13410D	0	0	0	0	0	0	0	0	0	0	0	0	0	0	0	0	0	0	0	0	0	0	0	0	0	0
BnaA01g13420D	0.419562	0.235204	0.347768	2.94219	2.07674	1.61551	2.16118	3.96586	1.00289	1.1846	1.28043	0.374777	0.144426	0.201719	0.427563	0.330389	1.05648	2.22348	2.29414	3.10112	0.920713	1.1809	1.22252	2.20267	2.02288	2.26847
BnaA01g13430D	0.575011	0.758035	0.340765	0.157046	0.185189	0.036899	0.042898	0.662513	0.152388	0.620836	0.644993	0.387685	0.080749	0	0.34155	0.807066	0.729025	0.036639	0.237597	0.126332	0.210465	0	0.037482	0.457577	0.098024	0.810372
BnaA01g13440D	0	0	0	0	0	0	0	0	0	0.007865	0	0	0	0	0.000314	0.000333	2.5284	0	0	0	0	0	0	0	0	0
BnaA01g13450D	0	0	0	0	0	0	0	0	0	0	0	0	0	0	0	0	0	0	0	0	0	0	0	0	0	0
BnaA01g13460D	1.38154	2.31385	0.806634	3.10421	1.78945	4.87047	6.08285	4.21908	0.398538	0.990996	0.582446	0.153398	0.030065	0.239256	2.28809	2.87961	3.28003	3.81689	1.9459	1.72702	0.733582	0.64937	0.40113	3.96933	3.3564	3.19392
BnaA01g13470D	21.0156	20.2204	21.1384	34.7809	35.9725	32.7603	46.256	32.7316	40.9586	37.6764	44.021	53.1021	50.5026	47.558	27.5754	27.4857	24.4634	31.6341	33.0289	32.6837	46.3918	39.5006	48.3653	23.6728	22.2984	20.6212
BnaA01g13480D	0	0	1.85617	0	0.849682	3.10569	0.767878	4.50837	1.36711	2.24585	0	3.65726	3.86125	1.23633	1.91559	0	1.17501	3.38124	2.90734	2.41342	1.17719	2.57159	2.08722	2.55512	2.10995	4.35976
BnaA01g13490D	0.900984	1.54066	1.57418	8.91456	7.85334	3.19523	2.47871	3.46611	0.612082	0.945907	0.533695	1.62173	1.81707	0.718282	11.0904	14.0568	19.147	13.7671	8.68198	6.34246	3.40081	3.87259	5.86484	6.85056	6.19283	4.25652
BnaA01g13500D	6.9937	3.68077	2.60364	26.1398	26.6443	45.3689	52.7044	44.2784	11.33	27.3289	15.5169	39.2804	41.1288	23.1678	12.8708	16.9233	14.4923	24.3158	21.804	22.5919	20.2911	25.8438	49.3974	8.24462	11.6481	11.465
BnaA01g13510D	124.368	146.334	149.573	93.3148	80.2406	70.9289	60.9331	86.3697	95.147	72.7238	78.1568	14.247	15.3207	20.1936	155.081	148.552	172.357	62.9906	89.7055	66.1189	105.631	96.2564	88.3751	152.92	148.562	118.218
BnaA01g13520D	1.77816	1.52723	1.64077	1.3389	2.00767	2.54487	2.46093	3.63576	0.538223	0.974757	1.94508	0.9899	0.170388	0.651634	1.33362	1.55995	2.32328	1.4417	2.03153	1.27053	3.05766	1.95537	2.00254	2.42841	1.68118	1.90003
BnaA01g13530D	2.68781	1.67016	1.96113	2.12932	2.80539	6.99758	5.0698	5.47215	6.75205	7.14282	8.63387	6.42244	6.05143	3.42015	1.82336	2.67943	1.87342	1.68616	2.55321	2.98367	1.74731	1.91321	2.08128	2.92422	4.22784	2.90389
BnaA01g13540D	2.23306	2.79446	2.32919	19.0015	17.9735	65.7661	75.2307	56.0232	2.10947	2.39603	2.19092	13.7806	5.94112	13.7799	5.70738	3.01489	4.15066	20.8065	9.88947	22.4323	62.4164	60.3032	110.744	5.50563	9.98352	7.51342
BnaA01g13550D	2.07652	2.42796	1.53943	2.37974	2.67712	6.89593	5.16856	6.01992	3.45229	2.91613	2.06217	2.46666	3.79369	5.69003	1.14132	1.99914	1.24636	3.32775	6.608	4.27756	5.32197	4.51933	7.31249	4.76729	5.89419	4.72633
BnaA01g13560D	8.86022	10.3441	7.50752	5.07811	4.80385	3.05139	3.93203	5.47875	4.267	4.81879	4.33462	1.07011	1.58782	1.51084	5.08305	5.69908	6.04432	5.23756	5.67049	6.05519	3.6013	4.08434	2.9812	7.50415	6.65728	6.68666
BnaA01g13570D	0.092608	0.065567	0.082103	0.050439	0.070299	0.217066	0.41483	0.187155	0	0.068884	0	0.050285	0.021271	0.092275	0	0.046213	0.020922	0.165848	0.20432	0.049097	0.16828	0.101819	0	0.136725	0.040661	0.114436
BnaA01g13580D	0.738495	0.710597	0.62592	0.284027	0.230179	1.17478	1.22047	1.71375	1.23028	1.17694	0.987392	0.632271	0.685731	0.54426	0.498907	0.365291	0.436273	0.529175	0.690153	0.885235	0.706604	0.53228	0.60817	1.74787	1.24536	1.49823
BnaA01g13590D	0	0	0	0	0	0	0	0	0	0	0	0	0.113761	0	0	0	0	0	0	0	0	0	0	0	0	0
BnaA01g13600D	0	0	0	0	0	0	0	0	0	0	0	0	0	0	0	0	0	0	0	0	0	0	0	0	0	0
BnaA01g13610D	11.6971	13.2727	8.48524	2.10695	1.6078	1.2809	0.931187	1.28047	3.87921	3.54871	3.43583	1.69831	1.30267	1.82247	3.28002	4.75838	5.75785	6.62747	5.73335	4.2978	1.70862	3.15166	1.05151	9.10998	5.87229	6.88442
BnaA01g13620D	0.30054	0.318362	0.669616	0.189368	0.250827	0	0	0.035734	0.639401	0.628675	0.299788	0	0	0	0.051765	0.141242	0.099593	0.035684	0.257132	0.07212	0.193154	0.136211	0.071412	0.297103	0.171018	0.26518
BnaA01g13630D	5.22901	5.77617	5.57695	3.68159	4.25346	4.17114	4.68713	3.58365	4.87418	4.68657	3.80561	10.0718	7.65726	8.79651	4.15068	4.47502	3.90498	7.94559	7.42056	7.02202	4.62733	5.08116	5.20983	3.87013	3.43977	4.18577
BnaA01g13640D	0	0	0	0.039938	0	0	0	0	0	0	0	0.019608	0.023133	0	0	0	0	0	0	0	0	0	0	0	0	0
BnaA01g13650D	4.24426	5.36335	4.14374	2.03736	1.73711	0.40895	0.837956	0.974684	2.75272	3.1412	1.55665	0.820343	1.78596	1.99795	1.85275	2.30879	2.05734	2.18907	1.97205	2.00926	0.997734	0.971016	0.595381	2.95139	2.91323	2.64563
BnaA01g13660D	0	0	0	0	0	0	0.070024	0.143309	0	0	0	0	0.077887	0	0	0	0.146929	0	0	0.141536	0.070382	0	0.114308	0	0	0
BnaA01g13670D	33.9054	27.7483	22.994	29.4245	52.4853	8.22206	9.36093	13.4175	20.144	21.6177	30.2027	68.592	77.8857	57.1445	22.2044	37.4538	28.4471	32.636	57.5755	43.6947	28.4002	28.7542	60.666	32.2371	24.7101	23.2737
BnaA01g13680D	0	0	0	0	0	0	0	0	0	0	0	0	0	0	0	0	0	0	0	0	0	0	0	0	0	0
BnaA01g13690D	4.81817	8.03161	6.16258	4.14869	4.82856	17.0989	14.1865	12.6221	4.8503	3.70655	2.34654	18.8384	20.3564	25.0803	11.8456	15.9642	12.0518	12.702	15.306	14.5011	11.8918	15.8066	14.9023	8.60814	10.121	11.5388
BnaA01g13700D	0.617645	0.282156	0.486484	1.31998	0.95221	51.9856	33.3558	36.2603	1.66642	0.941099	1.32026	16.1417	17.584	20.6632	6.35399	11.4075	3.11242	2.2817	2.05794	2.82578	15.7229	6.69475	21.2043	0.825743	1.54467	1.12922
BnaA01g13710D	0.327723	0.431282	0.331895	0.410704	0.638856	1.02771	0.909808	0.619126	0.115143	0.264143	0.059122	0.377559	0.617397	0.177972	0.553875	0.155735	0.253082	0.743124	0.566475	0.971176	0.617086	0.542663	0.705559	0.304498	0.060088	0.510438
BnaA01g13720D	0.399564	0.607279	0.563427	0.455491	0.305674	0.426084	0.544106	0.18833	0.564597	0.590367	0.886391	0.605308	0.439429	0.357186	0.040087	0.487068	0.198476	0.260988	0.255925	0.176171	0.168742	0.336102	0.125208	0.08281	0.173422	0.153289
BnaA01g13730D	0.176139	0	0.158171	0.103885	0.075709	0.441834	0.097047	0.24187	0.246686	0.344524	0.070958	0.331323	0.137484	0.081154	0.074637	0.156524	0.197918	0.038998	0.266468	0.022272	0.232245	0.426589	0.245249	0.039045	0.117754	0.105376
BnaA01g13740D	0	0.067475	0.12487	0.084274	0	0.069456	0.157215	0.034674	0.033945	0	0.069854	0	0.032689	0	0.055859	0.057512	0	0.05646	0.05064	0.070098	0	0	0	0.0195	0	0
BnaA01g13750D	0	0.294753	0.231508	0	0.098248	0	0.052226	0	0	0.092868	0	0.203638	0	0	0.048918	0.13948	0.206329	0	0.252392	0.10369	0.152926	0	0	0	0	0.203795
BnaA01g13760D	1.45835	1.74205	1.62064	1.05943	0.876368	1.87396	1.44073	2.73589	1.5471	1.55112	1.29596	2.42971	2.23191	2.6411	1.10366	1.24701	1.07002	1.92176	2.62907	2.23345	1.60591	1.79043	1.46755	1.81916	1.58296	2.22015
BnaA01g13770D	0.49664	0.392203	0.489021	0.200473	0.432154	0.298415	0	0	0.28863	0.093384	0.200774	0.249357	0	0.148665	0	0.135822	0.309122	0.196989	0.099772	0.100392	0.077845	0.229343	0.153993	0.1	0.288638	0.192619
BnaA01g13780D	20.6958	24.6613	13.1081	4.49585	6.51825	3.99717	4.16943	4.34568	10.3608	11.0755	7.24848	13.1592	12.9469	13.1122	4.14045	3.95652	3.70447	24.7547	19.9851	26.3027	3.11148	3.67646	2.11459	19.2351	15.0349	15.1399
BnaA01g13790D	0	0	0	0	0	0	0	0	0	0	0	0	0	0	0	0	0	0	0	0	0	0	0	0	0	0
BnaA01g13800D	4.5259	3.9505	4.33627	4.97801	5.58589	8.64379	9.07393	8.7631	7.09652	6.53097	11.368	8.26592	5.7837	6.42755	3.78828	3.81453	3.78453	6.79022	6.49351	7.03853	8.80828	7.85241	10.5805	5.48355	4.9061	5.45855
BnaA01g13810D	0	0	0	0	0.089226	0	0	0	0.126453	1.66	3.09444	0.751919	0.107783	0	0	0	0	0	0	0	0	0	0.185024	0	0	0
BnaA01g13820D	0.226133	0.197689	0.089031	0	0.098509	0.042126	0.085886	0.05088	0.22123	0.173713	0.175618	0.224823	0.580995	0.078506	0.049018	0.050699	0.025201	0.165296	0.049907	0.202805	0.181902	0.063683	0.127099	0.108611	0.069022	0.083983
BnaA01g13830D	3.05331	3.88278	3.43423	3.72124	5.10146	6.54299	6.29291	6.11204	5.56119	6.16975	4.38707	9.29751	12.6095	10.2622	3.3952	4.30488	3.73267	5.57242	4.83204	6.42126	7.07514	5.26774	7.026	3.83827	4.05622	4.10043
BnaA01g13840D	0	0	0	0	0	0	0	0	0	0	0	0	0	0	0	0	0	0	0	0	0	0	0	0	0	0
BnaA01g13850D	9.82867	10.2867	8.29191	8.41081	12.8277	4.96547	3.215	1.82913	14.1562	12.1125	10.3223	6.49701	8.52362	9.06277	4.38496	4.19524	6.28049	6.26953	4.26506	5.0285	10.1843	5.91203	4.5164	8.89815	5.24799	7.67541
BnaA01g13860D	6.51744	5.15309	7.24699	8.19736	6.56333	4.35585	3.53589	3.90475	6.42097	4.79882	7.75727	0.439763	0.275098	0.252975	6.26083	6.53906	8.13453	3.19296	3.1234	2.26118	2.83853	3.25136	3.69717	12.5176	8.29961	10.4848
BnaA01g13870D	2.01042	3.24825	2.83827	2.12929	4.1536	2.34688	2.3532	3.1859	3.25102	1.93857	2.64217	2.97796	1.93688	2.92208	1.73768	2.69554	2.94804	2.63118	4.31669	4.17527	3.5483	3.10115	3.5396	4.85456	3.08327	3.70706
BnaA01g13880D	15.4655	17.3744	15.1459	17.8954	40.7401	6.45866	11.54	5.06037	29.4007	33.1732	21.5273	24.7039	35.6941	22.5965	7.66984	8.66299	13.5849	16.4215	14.5103	14.8582	14.9194	8.17011	8.24523	11.1436	11.106	9.68913
BnaA01g13890D	0.964464	1.45282	1.39201	0.999605	1.0716	3.12514	3.78	3.4363	0.867585	1.04755	0.929158	4.25547	2.13463	2.95066	1.02951	1.05178	1.44952	2.00012	2.38327	2.69938	3.01581	2.66764	3.38907	2.47804	2.01549	2.76306
BnaA01g13900D	0.786477	0.761966	0.680027	0.43613	0.500371	0.904337	0.650665	0.852383	0.639548	0.87387	0.698493	0.528774	0.210057	0.369368	0.287309	0.440259	0.289714	0.893064	0.858459	0.698941	1.01269	0.875319	0.743523	0.827557	0.730638	0.862284
BnaA01g13910D	7.91672	6.78866	7.53444	6.06305	5.37117	16.2787	15.5548	15.0979	9.06961	8.56084	7.85041	7.26828	6.17055	7.52282	6.8662	6.56303	6.18272	12.3856	9.34014	11.9955	10.6444	12.7922	12.0292	9.39016	11.4175	10.543
BnaA01g13920D	2.33555	1.93736	2.15042	1.22145	1.4267	3.32398	2.71743	2.91538	1.74345	0.988722	1.28628	2.11242	1.79379	2.19888	1.88894	2.32766	1.95177	3.7691	4.27646	4.51977	2.8738	2.96671	2.9999	3.40914	2.70241	3.0052
BnaA01g13930D	0	0	0	0	0	0.016585	0	0	0	0	0	0	0	0	0	0	0	0	0	0	0	0	0	0	0	0.070869
BnaA01g13940D	2.27086	2.39629	2.5884	1.51813	2.31857	2.44138	2.91856	2.59075	2.21747	2.69635	1.87649	3.2097	3.07966	3.29602	2.08692	2.01477	1.41935	3.07492	2.67575	2.78713	2.64408	2.42977	3.27188	2.96414	2.41863	2.95973
BnaA01g13950D	2.74006	1.83224	0.727387	2.23118	2.195	0.302902	0.689358	0.51241	1.17289	11.6213	5.35453	23.8765	28.2609	3.74017	5.64496	5.80185	4.92679	1.64505	3.39291	1.85656	0.456533	0.51778	1.35601	0.62258	0.367461	1.15734
BnaA01g13960D	0.482447	0.338852	0.3318	0.480767	0.317652	0.611262	0.348399	0.539743	0.369091	0.363834	0.272282	1.31008	1.18567	1.26278	0.371619	0.457918	0.449855	0.374733	0.537235	0.328691	1.36106	0.69106	0.682238	0.210922	0.278845	0.192008
BnaA01g13970D	3.33225	5.11647	3.03548	8.90824	8.88226	21.074	19.1597	16.2975	5.0359	5.81882	5.42126	11.9114	13.7371	13.6151	6.43096	5.54437	7.39217	10.9516	10.0503	8.1362	14.1842	13.7458	13.2572	10.7182	10.3205	10.1801
BnaA01g13980D	0.050313	0.10665	0.006031	0.455805	0.038574	0.081173	0.06163	0.202031	0.005006	0.013215	0.011036	0.446486	0.492749	0.086192	0.058423	0.020665	0.013767	0.131199	0.002447	0.015804	0.007105	0.018295	0.109156	0.011563	0.01055	0.069886
BnaA01g13990D	3.07036	2.23106	2.21909	1.3165	1.49688	0.521554	0.403023	0.514823	2.2997	1.28353	0.950885	0.828346	0.775804	0.840263	1.21127	1.64266	1.19763	1.46505	1.37187	1.56505	0.846204	0.594995	0.832399	1.49527	0.766659	0.833589
BnaA01g14000D	0	0	0	0	0	0	0	0	0	0	0	0	0	0	0	0	0	0	0	0	0	0	0	0	0	0
BnaA01g14010D	0.119823	0.066218	0	0	0	0	0	0	0.05109	0.059383	0	0	0	0.278624	0	0	0	0	0	0	0.066743	0	0	0.067362	0	0
BnaA01g14020D	3.81707	5.05838	4.02531	0.253678	0.509331	0.191294	0.202612	0.340113	4.777	8.80033	3.86249	0.067562	0.292537	0.643539	0.127645	0.133838	0.91471	0.465119	0.163679	0.090434	0.434568	0.255986	0	1.28193	1.05989	1.51117
BnaA01g14030D	0.529365	0.238916	0.409108	0.120757	0	0	0.034393	0	0.72158	0.406267	0.143899	0	0	0	0.065301	0.109978	0.068053	0.050764	0.206021	0.040423	0	0.084723	0.033073	0.208536	0.07565	0.15309
BnaA01g14040D	0.070742	0.328485	0.054896	0.502649	0.195905	0.078532	1.15653	0.525076	0.168405	0.066881	0.327714	0.129038	1.01465	0.141743	0.513674	0.105343	0.155341	4.23381	0	0.196921	0.030037	0.207279	0.308531	5.89291	1.3555	0.113533
BnaA01g14050D	12.7975	11.9106	12.8428	15.2347	15.5846	43.5572	43.4784	41.2797	13.9766	11.623	13.2452	21.3009	14.9618	19.9394	13.4482	12.1861	13.6614	17.5869	18.9837	18.7224	27.382	30.4345	36.6233	19.8681	21.351	21.9128
BnaA01g14060D	19.9667	21.9053	16.1507	8.62604	8.28173	5.71576	5.3692	3.69669	10.252	19.9365	13.3955	2.60326	2.21667	3.66985	5.23268	2.47693	10.1484	15.4847	13.8282	11.3194	10.0668	11.4903	7.37154	21.796	20.3508	19.3882
BnaA01g14070D	0.071328	0.054531	0.130525	0.054936	0	0.071672	0.128904	0.03925	0	0	0.136453	0.076396	0.158915	0.059777	0.055862	0.099609	0.09953	0.0383	0	0.10052	0.20922	0.02397	0.076389	0	0.299142	0.033505
BnaA01g14080D	0.062157	0	0	0	0	0	0	0	0	0	0	0	0	0	0	0	0	0	0	0.217922	0	0	0	0	0	0
BnaA01g14090D	0	0	0	0	0	0	0	0	0	0	0	0	0	0	0	0	0	0	0	0	0	0	0	0	0	0
BnaA01g14100D	14.0688	14.7429	13.186	15.5054	16.9694	25.9977	22.9091	23.6515	10.3359	9.77393	7.91349	23.656	24.0585	25.2829	16.4394	16.7142	15.9805	25.8267	22.6853	26.4712	17.7989	16.8718	17.8389	20.6943	19.3809	18.7306
BnaA01g14110D	4.55751	6.45911	3.19865	2.13505	2.50658	1.42226	3.09236	1.17716	1.8216	3.62497	2.32267	1.30168	2.57569	1.28782	0.969146	0.567025	0.973154	1.28414	1.16874	1.60438	0.957332	1.00247	0.319962	2.34892	2.97831	3.07132
BnaA01g14120D	71.7146	80.6586	65.8698	40.8411	35.3563	17.0257	25.6993	22.7017	34.8456	34.8537	22.7123	10.3915	13.7752	16.8437	33.9352	32.0245	37.1867	22.6376	16.4081	19.4428	14.8232	15.2901	9.4853	33.4709	22.2245	29.4445
BnaA01g14130D	5.00365	3.43902	3.00988	1.7574	1.63842	2.86992	2.6618	8.75334	0.296187	0.936079	0.892602	0.164812	0.716788	0.798361	2.24549	0.996805	2.85845	1.57847	3.76313	1.51917	7.28666	15.0658	6.8227	7.00641	3.85792	4.31654
BnaA01g14140D	0	0	0	0	0	0	0	0.024061	0	0	0	0	0	0	0	0	0	0	0	0	0.024241	0.021931	0	0	0	0.037652
BnaA01g14150D	0	0	0	0.473972	0	0	0	0	0	0.518103	0.627071	0.460921	0	0.376346	0	0	0	0.42488	0	0	0	0	0	0	0	0
BnaA01g14160D	0.199947	0.149502	0.150381	13.2145	0.140323	0.205969	0.24187	0.182628	5.14609	6.24188	4.28414	7.58223	6.50492	8.14941	0.215497	0.161778	0.138741	6.38053	0.211966	0.254676	0.216175	0.127857	0.200322	0.150508	0.1938	0.259418
BnaA01g14170D	4.01362	4.46814	3.41801	2.88251	2.80787	4.99872	2.8276	4.08915	5.00971	4.44702	3.65508	6.34355	6.69614	5.88177	3.19697	3.53007	3.03742	3.72494	2.07567	3.50337	4.306	2.75766	4.69831	3.27468	3.35893	2.97478
BnaA01g14180D	8.12033	7.65824	6.99537	5.66163	5.40492	21.6762	16.4235	18.2631	8.43333	9.94321	8.84276	24.9785	23.7199	24.6926	5.71811	6.72652	8.25837	13.8414	13.2548	12.9154	13.8269	10.0372	13.7576	9.67667	9.91952	8.45574
BnaA01g14190D	0.063381	0	0.015522	0	0.0022	0	0	0	0.015976	0	0.044037	0	0.033868	0.019982	0	0.01722	0	0	0	0	0	0.007576	0	0	0	0
BnaA01g14200D	1.86544	2.14767	1.79215	1.8024	1.55522	2.93109	2.03594	2.71169	2.1294	2.02445	2.54373	3.27859	2.81929	2.76922	1.66827	1.77503	1.74291	2.74546	2.93002	3.11343	1.90315	2.57027	2.18807	2.90722	2.28319	2.58613
BnaA01g14210D	0	0	0	0	0	0	0.09888	0	0	0	0	0	0	0	0	0	0	0	0	0	0	0	0	0	0	0
BnaA01g14220D	0	0	0	0	0	0	0	0	0	0	0	0	0	0	0	0	0	0	0	0	0	0	0	0	0	0
BnaA01g14230D	0	0	0	0	0	0	0	0	0	0	0	0	0	0	0	0	0	0	0	0	0	0	0	0	0	0
BnaA01g14240D	10.9266	13.0528	13.6503	1.06531	0.95237	2.93541	2.14681	2.96598	17.5908	7.6293	7.34835	4.56359	3.25082	3.0588	1.76932	6.49378	1.50224	2.62465	3.9696	2.83582	2.43176	2.00554	2.24585	1.14015	1.24254	1.12931
BnaA01g14250D	0.47777	0.637913	0.092646	1.61992	1.59182	2.96032	2.4242	1.84646	0.688241	1.40542	2.23083	2.21915	1.60321	1.61636	0.88786	0.619647	0.971229	1.86531	1.54753	1.28096	0.028132	1.11165	1.92534	1.36046	0.74602	0.969197
BnaA01g14260D	0.061809	0	0.15132	0.027913	0.077816	0.218675	0.093139	0.271142	0	0.089962	0	0.092657	0.160996	0.193985	0.059148	0.031319	0.248456	0.09395	0.430385	0.234465	0.197933	0.126224	0	0.155135	0.061924	0.195563
BnaA01g14270D	0.493416	0.513749	0.07608	0.526929	0.489307	0.668853	0.713901	0.807134	0.735789	0.152604	0.15138	0.867133	1.37951	1.07417	0.218619	0.533855	0.515716	0.147347	0.327199	1.17681	0.64707	0.951611	0.657713	0.387803	0.728136	0.514596
BnaA01g14280D	0	0	0	0	0	0	0	0	0	0	0	0	0	0	0	0	0	0	0	0	0	0	0	0	0	0
BnaA01g14290D	22.0604	30.395	24.851	11.1582	10.7581	2.82186	5.77925	3.67246	15.2667	22.5869	17.0769	5.16461	7.54837	7.58025	11.2737	10.8733	13.1496	6.32728	7.74505	4.93464	7.21785	4.75979	2.66631	14.8682	11.8539	13.2197
BnaA01g14300D	2.03121	1.40605	1.21376	0.450988	0.424538	2.61774	2.07596	2.68151	1.29021	0.644666	0.840798	0.3473	1.78912	1.29004	0.738036	1.50122	1.3724	1.32108	1.02599	1.14482	1.54411	1.4075	1.12802	1.88484	0.699654	2.20656
BnaA01g14310D	0	0	0.117697	0.016387	0	0.182584	0.347105	0	0	0.171063	0	0	0.283311	0	0	0.63594	0	0.214475	0.163454	0.567297	0.236082	0.010897	0.983833	0.19728	0.213908	0
BnaA01g14320D	0	0	0	0	0	0	0	0.074785	0	0	0	0	0.378912	0.502788	0	0	0	0	0	0	0	0	0	0.29891	0	0
BnaA01g14330D	0.854751	1.37989	1.11036	0.646447	0.468478	0.191211	0.297534	0.862736	1.0695	0.978373	0.720938	0.232676	0.47655	0.249824	0.486056	0.585184	0.700304	0.882622	0.995444	0.820364	0.328088	0.396531	0.292472	1.43544	1.4457	0.911653
BnaA01g14340D	3.67727	3.13419	2.59299	0.087138	0.128323	0	0.192041	0.363949	0.96266	0.188191	1.29035	0.733892	1.407	3.03236	0.122173	0.179646	0.047746	0.094765	0.277596	0.190417	0.364168	0.748642	0.446241	2.57549	2.27694	1.15147
BnaA01g14350D	0.38638	0.53981	0.738616	0.272238	3.80627	0.627075	1.06105	1.136	3.97269	0	1.10664	0.602307	0.663547	0.205329	0.128796	2.23971	0	1.07304	1.24104	0.647987	1.08353	0.116031	5.9255	0	0.788746	1.08493
BnaA01g14360D	0	0	0	0	0	0	0	0	0	0	0	0.400313	0.11493	0.287057	0	0	0	0	0	0	0	0	0	0	0	0
BnaA01g14370D	0.336441	0.532801	0.438118	0.440659	0.229291	0.225429	0	0.220551	0.2222	0.786362	0.102709	2.41569	3.97079	1.79046	0.109151	0.451577	0.227123	0.33941	0.88349	0.668039	0	0.113748	0.113207	0.887404	0	0.115437
BnaA01g14380D	1.35007	2.33396	0.895659	1.51681	8.85121	1.78168	2.89712	0.826151	1.20053	5.66375	2.32298	5.03515	5.29971	5.18526	0.510068	0.590849	1.21332	0.66079	0.969832	0.544066	1.43545	0.232418	0	0.893128	0.401951	0.539915
BnaA01g14390D	0	0	0	0	0	0	0	0	0	0	0	0	0	0	0	0	0	0	0	0	0	0	0	0	0	0
BnaA01g14400D	140.154	183.752	115.109	25.7592	28.3202	5.67143	14.4847	6.96286	77.4018	101.828	83.4378	15.8341	28.9036	19.782	32.8762	26.029	40.164	25.1404	16.9275	18.275	14.7015	14.8472	6.8132	46.9052	43.7317	43.3403
BnaA01g14410D	0	0	0	0	0	0	0	0	0	0	0	0	0	0	0	0	0	0	0	0	0	0	0	0	0	0
BnaA01g14420D	165.116	187.732	169.641	90.7263	84.2089	32.8959	42.0966	57.4229	98.1966	112.661	98.5983	11.5684	12.5777	14.7838	118.565	113.618	114.487	38.4405	50.4341	43.926	83.2687	84.419	75.6356	86.516	115.439	98.3125
BnaA01g14430D	8.89684	3.49654	13.0404	11.0103	2.99498	14.7421	19.3296	16.8692	16.1447	8.55555	4.20872	9.8974	6.21953	14.4289	12.6087	11.2646	15.1944	20.8277	5.00249	20.9201	10.5449	5.81132	10.1864	20.1	23.1906	5.26296
BnaA01g14440D	0	0	0.044774	0.515978	0.518508	0	0.755293	0	0.073374	0	0	0	0	0.051207	0	0.055681	0	0	0	0	0	0	0.455834	0	0	0.074808
BnaA01g14450D	2.65104	3.03327	21.7226	3.12272	4.79206	1.03855	8.18516	0.574719	2.48516	2.03466	17.1967	7.43953	10.5365	7.22656	11.0229	6.34364	52.1709	24.5323	2.19998	15.4513	9.46036	11.7466	1.05848	24.8453	2.49435	21.7086
BnaA01g14460D	0.055643	0.069687	0	0.357113	0.411509	0	0.000388	0	0.00038	0.035819	0.029063	0.005062	0.018437	0.015194	0.031345	0.082803	0.686555	0.037188	0.020736	0	0	0.007537	0	0	0.043035	1.02327
BnaA01g14470D	94.8989	90.9298	109.843	105.475	108.361	96.8257	121.07	117.343	61.7762	68.6191	51.5424	50.3773	62.588	66.0578	124.002	102.278	110.212	66.3437	60.3944	66.7414	121.217	92.6171	96.7073	66.4237	62.7071	64.2371
BnaA01g14480D	0	0	0.063574	0.113924	0	0.18516	0.100512	0	0.28926	0	0.124806	0.132789	0.061244	0.196372	0	0	0	0	0.054617	0.096015	0.051911	0	0.10986	0.085559	0.182779	0.067003
BnaA01g14490D	0.844349	1.29252	0.948278	0.256734	0.282781	0.363819	0.469077	0.207488	0.183608	0.298403	0.323696	0.138226	0.144166	0.04791	0.217003	0.275202	0.179073	0.181529	0.274876	0	0.340118	0.117138	0.093389	1.12013	1.0715	1.09497
BnaA01g14500D	0	0	0	0	0	0	0	0	0	0	0	0	0	0	0	0	0	0	0	0	0	0	0	0	0	0
BnaA01g14510D	0.021248	0	0.018123	0	0.011868	0.01173	0.033525	0.009321	0.001676	0	0	0	0	0.003924	0	0	0	0	0	0	0.000916	0	0	0	0	0
BnaA01g14520D	3.32668	2.77911	2.70495	2.06523	2.46708	3.09957	3.4839	2.87783	8.98417	13.3345	16.0468	9.1457	11.2797	10.7962	2.69154	2.50142	1.68523	1.30568	2.09489	1.17789	6.5675	6.14156	5.15894	3.70779	4.32026	4.19625
BnaA01g14530D	0.99229	1.55735	1.0463	1.8378	1.53424	3.32676	2.72814	2.69114	2.04297	1.31521	2.25479	3.16048	4.99228	3.84301	1.67377	1.25498	1.30649	1.83124	2.41816	2.50088	2.17769	2.16544	2.55107	2.41703	1.66794	1.77282
BnaA01g14540D	0	0	0	0	0	0	0	0	0	0	0	0	0	0	0	0	0	0	0	0	0	0	0	0	0	0
BnaA01g14550D	0	0	0	0	0	0	0	0	0	0	0	0	0	0	0	0	0	0	0	0	0	0	0	0	0	0
BnaA01g14560D	0.509971	0.754639	0.305093	0.481883	1.19426	7.11142	1.10715	3.47533	0.190564	0.064122	0	1.2426	1.39565	2.51473	0.68471	0.938455	0.822212	4.24428	6.82434	6.8922	0.375859	0.844052	1.27448	3.05986	3.96063	3.72328
BnaA01g14570D	4.62414	3.36086	3.08477	3.41056	2.39537	11.3992	9.15621	10.7809	4.94433	6.2478	5.40297	8.17039	11.1574	9.63754	1.98094	2.86186	2.81891	6.65836	9.2322	7.88897	5.43773	6.93422	7.59751	11.8506	11.9933	12.572
BnaA01g14580D	0	0	0	0	0	0	0	0	0	0	0	0	0	0	0	0	0	0	0	0	0	0	0	0	0	0
BnaA01g14590D	0	0	0.009367	0	0	0.072505	0.004535	0	0	0	0.000878	0.030022	0.036535	0	0	0	0	0	0	0	0	0	0	0	0	0
BnaA01g14600D	0.502584	0.580229	0.47146	0.143395	0.047993	0.027335	0.221211	0.326876	0.026808	0.216223	0.082474	0.177028	0.084011	0.170739	0.210352	0.190099	0.268815	0.163525	0.502804	0.603526	0.209204	0.402802	0.696685	0.398009	0.217076	0.249997
BnaA01g14610D	0	0	0	0	0	0	0	0	0	0	0	0	0	0	0	0	0	0	0	0	0	0	0	0	0	0
BnaA01g14620D	0	0	0	0	0	0	0	0	0	0	0	0	0	0	0	0	0	0	0	0	0	0	0	0	0	0
BnaA01g14630D	0	0	0	0	0	0	0	0	0	0	0	0	0	0	0	0	0	0	0	0	0	0	0	0	0	0
BnaA01g14640D	3.32231	2.52055	2.42278	0.572262	0.747641	0.792824	0.340157	1.12606	1.6744	1.72585	1.57483	0.499711	0.338535	0.57676	1.07007	1.12234	1.01079	1.59088	1.60051	1.20956	1.03606	1.13663	0.977391	1.44152	1.84028	1.62982
BnaA01g14650D	0.416845	0.681567	0.436248	0.287392	0.149013	0.391831	0.243455	0.576738	0.302826	0.398273	0.25416	0.922143	1.27658	1.25231	0.228511	0.43101	0.144886	0.536488	0.426697	0.409679	0.065922	0.360415	0.479167	0.822488	0.424868	0.336811
BnaA01g14660D	1.72856	2.25967	2.44764	2.00079	2.3532	4.57744	2.78197	3.46561	2.36119	1.83727	1.02882	5.98318	6.84996	5.5218	2.14148	2.05323	2.21695	3.69115	2.49825	3.46044	2.5296	2.34477	1.8798	2.94085	2.55021	2.39265
BnaA01g14670D	0	0	0	0	0.103117	0	0.094302	0.101783	0	0	0	0.202214	0.154895	0.074687	0	0	0	0.485759	0.214207	0.227845	0	0.273127	0	0	0	0
BnaA01g14680D	0	0	0	0	0	0	0	0	0	0.093796	0	0.467906	0	0	0	0	0	0.449962	0.147225	0.170203	0	0	0	0.194718	0	0
BnaA01g14690D	0.041399	0	0	0.115154	0	0.256203	0.398658	0.066966	0	0	0	1.06525	0.080341	0.274556	0	0	0.067234	0.182781	0.109257	0.135379	0.378504	0.065664	0.263063	0	0	0.068231
BnaA01g14700D	1.13551	0.767148	0.456332	0.344778	0	1.0946	0.93718	0.73198	0.38799	0.810158	0.363568	0.058306	0.111363	0.078253	0.395659	0.321583	0.532878	0.644667	1.35966	0.263581	0.511315	0.152616	0.405123	0.651101	1.31824	1.30716
BnaA01g14710D	1.76988	1.77892	2.06579	1.05269	1.11023	3.64808	2.87404	3.63942	1.56301	2.62503	1.62724	3.34789	3.27156	3.47593	1.93202	1.90509	1.43908	2.58483	2.81252	2.57985	2.72443	1.77126	3.06387	2.67927	2.60813	2.44276
BnaA01g14720D	1.93925	2.25636	1.51424	0.312952	0.873572	0.208514	0.210694	0.31119	2.01124	3.86872	1.25779	34.0082	50.0984	37.6498	0.65854	1.21176	0.527398	1.86358	3.01559	2.82324	0.324614	0.36518	0.277661	1.58135	0.588988	0.74386
BnaA01g14730D	0.030487	0.042779	0.000248	0.41472	0.20028	0	0.21053	0.085586	0.416566	0.500316	0.208347	0	0.161422	0.017045	0	0.065686	0.086253	0.038459	0	0	0	0	0.000256	0	0	0.125375
BnaA01g14740D	0.832996	0.653198	1.15637	1.46231	1.3492	3.60535	4.07	3.6806	0.545323	0.592993	0.579692	1.82538	1.62605	1.83542	1.6214	1.25151	1.01873	1.40588	1.5577	1.4466	2.84747	2.01339	3.4243	1.20911	1.30337	1.01495
BnaA01g14750D	9.65474	7.75335	10.0965	4.60569	8.51337	29.6435	9.55233	27.429	13.1949	17.8793	17.9234	26.1108	28.346	27.2896	18.6711	16.9116	10.2707	6.49795	9.51613	11.4244	12.6403	9.72456	17.8725	13.3744	14.4585	7.85087
BnaA01g14760D	0	0	0	0	0	0	0	0	0.046128	0	0.047539	0	0	0	0	0	0	0	0	0	0	0	0	0	0.050234	0
BnaA01g14770D	0.516653	0.361723	0.460702	0.028183	0.219969	0	0	0.028984	0.200047	0.141854	0.175171	0.028099	0.029772	0	0.545162	0.646746	0.28939	0	0	0	0.082591	0.078375	0.144806	0.185518	0.11488	0.228822
BnaA01g14780D	0	0	0	0	0	0	0	0	0	0	0	0	0	0	0	0	0.083757	0	0	0	0	0	0	0	0	0
BnaA01g14790D	3.85324	4.31464	4.07982	1.89901	1.90924	4.18262	4.38106	3.0906	3.15002	3.51001	1.93241	3.99886	4.03563	6.53444	2.54919	3.31683	2.144	4.14254	4.53328	4.40942	1.84787	2.44467	2.26261	2.976	2.89776	3.79911
BnaA01g14800D	0	0	0	0	0	0	0	0	0	0	0	0	0.054699	0	0	0	0	0.047309	0	0.204168	0	0	0	0	0	0
BnaA01g14810D	0	0	0	0	0	0	0	0	0	0	0	0	0	0	0	0	0	0	0	0	0	0	0	0	0	0
BnaA01g14820D	0	0	0	0	0	0	0	0	0	0	0	0	0	0	0	0	0	0	0.076255	0	0	0	0	0	0	0
BnaA01g14830D	0	0	0	0	0	0	0	0	0	0	0	0	0	0	0	0	0	0	0	0	0	0	0	0	0	0
BnaA01g14840D	0.990653	0.958444	1.07369	0.994656	1.57754	0.944131	2.34272	0.871986	0.755863	0.901978	0.435991	2.20442	1.97919	1.87907	1.13906	0.86563	0.941079	1.21156	0.767513	0.942225	0.914231	0.644349	0.541724	0.967692	0.754662	1.42618
BnaA01g14850D	0.131607	0.122773	0.27428	1.16233	0.919299	1.39624	0.878186	1.47024	0	0.16468	1.03561	0.257242	1.11389	0.129748	0.61655	0.326542	0.853619	1.05031	0.886774	0.773053	0.48533	0.902796	0.628593	0.131314	0.53743	0.452669
BnaA01g14860D	11.1526	12.1905	5.66491	0.867729	4.86709	3.81637	4.37705	7.78397	11.8617	14.2997	7.54579	79.0637	98.417	106.374	3.13376	6.50687	2.11691	16.1777	14.9824	18.0834	1.59586	4.0533	2.68057	7.94131	5.60554	7.38194
BnaA01g14870D	1.44325	2.22729	1.2908	1.53291	1.12281	1.09454	1.58265	0.681709	4.45695	6.9608	3.24405	2.25294	2.79466	3.19538	0.85913	0.722665	0.847634	2.12108	2.36204	1.8044	1.13019	1.0646	1.66586	4.4725	2.79286	3.58828
BnaA01g14880D	83.2374	82.5286	87.1996	96.8688	89.3945	27.6098	48.223	46.8098	81.9911	71.5358	73.4881	70.3217	64.6978	71.6172	87.2974	67.4948	83.0604	92.4636	81.448	86.157	102.882	116.941	104.509	78.4328	76.0218	74.8771
BnaA01g14890D	0.238428	0.279328	0.109637	0.611724	0.705215	0.191971	0.811538	0.063892	0.216239	0	0.064357	0.09832	0.038028	0.289066	0	0.091299	0.184841	0.060186	0.143278	0	0.125527	0.369035	0.120021	0.388923	0.063575	0
BnaA01g14900D	22.3295	14.2214	21.7603	103.705	111.098	72.7941	121.851	56.8913	32.99	33.7916	0.148253	50.106	62.2728	61.1132	15.2806	0.108889	0.088061	36.463	29.7148	35.448	32.5746	38.4242	36.4764	19.2385	18.6434	19.001
BnaA01g14910D	2.71554	2.94939	2.52133	3.69857	3.43734	4.03519	7.48553	3.68422	2.29959	3.24429	2.32338	2.7339	2.22218	2.366	1.57031	1.51567	1.25146	3.13993	2.52879	2.67833	2.59495	2.76916	2.53817	3.03232	2.90978	2.37286
BnaA01g14920D	7.25861	6.54212	5.84908	26.2156	30.3584	33.6387	31.5209	22.439	11.582	8.62158	8.29527	32.6462	30.8678	36.2611	13.7425	16.7001	12.2669	26.8893	21.079	24.041	13.215	12.9398	12.2444	7.59288	9.99194	10.3478
BnaA01g14930D	5.37742	3.2634	7.65303	14.4689	1.46975	28.9254	19.3439	24.4921	6.6026	4.15542	8.54238	21.1955	5.01861	8.697	7.24209	17.767	10.4369	24.9291	23.4815	18.2117	16.7081	9.33434	11.9203	10.2496	13.3476	8.28672
BnaA01g14940D	1.30489	1.29307	1.65206	0.367498	0.250469	0.046902	0.002638	0	1.27606	3.18666	0.563151	0.131017	0.094296	0.318365	0	0	0.235147	0	0.446429	0.254928	0.104032	0.220261	0.000695	1.35134	1.1485	0.16382
BnaA01g14950D	0.757093	2.06976	2.04612	1.87563	0.025184	1.13107	1.92574	1.2905	6.52859	5.94283	5.33816	0.092996	0.008963	0.039251	0.116938	1.75979	1.46025	1.64941	0.775561	0.0972	0.3185	1.20423	0.505692	0.120755	0.194496	0.491523
BnaA01g14960D	12.6881	12.1293	8.39272	2.27145	3.31978	2.37335	3.67366	3.24257	3.24248	12.5433	8.56466	10.6348	18.7687	16.1512	2.39328	3.49632	3.59272	5.39848	5.67465	7.2263	0.984399	3.6243	1.65343	8.94785	6.50418	9.53131
BnaA01g14970D	0	0	0	0	0	0	0	0	0	0	0	0	0	0	0	0	0	0	0	0	0	0	0	0	0	0
BnaA01g14980D	0.275758	0.324839	0.377923	0.217074	0.326762	0.464241	0.778001	0.716038	0.342288	0.487613	0.218586	0.404029	0.636593	0.556282	0.19395	0.286062	0.146541	0.502032	0.389731	0.361039	0.415616	0.386653	0.330407	0.533573	0.349173	0.754462
BnaA01g14990D	1.7204	0.626963	4.11173	6.26662	2.78425	7.9741	3.64757	4.33164	4.55952	6.97152	4.32163	3.57645	3.5856	3.08139	1.36081	1.49642	0.721169	3.60993	3.24315	2.63842	5.09158	8.21921	3.29619	2.95711	2.77391	5.72803
BnaA01g15000D	0.691073	0.499389	0	1.36238	2.46022	0.114106	0.627734	0.230162	1.88755	1.83883	5.64737	12.165	13.718	3.15947	5.95852	12.9761	3.6754	0.96091	1.54967	2.60353	0.370662	0.554176	1.49716	0	0	0.052387
BnaA01g15010D	9.00141	16.3219	11.665	11.3825	8.12076	18.2693	13.7713	8.59008	6.34695	6.96448	4.61789	4.65795	3.31475	4.81391	5.38696	9.21523	13.1482	6.57708	4.90679	4.93215	9.95098	11.7234	5.62604	12.4335	12.5973	10.4736
BnaA01g15020D	0.050808	0	0	0.033438	0.038665	1.56085	1.94322	1.65156	0	0.075773	0.103789	0.053171	0.133838	0.132979	0.202342	0.198747	0.048849	0.30016	0.087202	0.22118	0.199142	0.275056	0.377595	0.325377	0.22191	0.452256
BnaA01g15030D	0	0	0	0	0	0	0	0.023288	0	0	0.020408	0	0	0	0	0	0	0	0	0	0	0	0	0	0	0
BnaA01g15040D	0.937899	0.123516	0.060481	0.927191	1.06957	2.73691	0.509567	0.98698	0.00621	0.762246	0.500177	1.06791	1.18731	0.406791	0.097587	0.072322	1.23376	1.30241	0.366347	0.010259	0.088267	0.14902	0.378755	0.289816	0.047137	0.5349
BnaA01g15050D	0	0	0	0	0	0	0	0	0	0	0	0	0.076976	0	0	0.045248	0	0	0	0	0.047068	0	0	0	0	0.275755
BnaA01g15060D	0	0	0.01125	0	0	0	0.015947	0	0	0	0	0.014079	0	0	0	0	0	0	0	0	0	0	0.014637	0	0	0
BnaA01g15070D	0.005225	0	0.019139	0	0.019319	0.033793	0.01345	0.010965	0	0	0.006443	0.019471	0.009848	0	0	0	0	0	0.050803	0	0.03572	0.009634	0.000628	0.008696	0.01367	0.027832
BnaA01g15080D	4.90666	5.72158	4.74787	22.2497	24.4868	15.3923	24.0607	22.3532	49.9746	56.677	124.639	52.1896	66.5019	37.8158	9.40906	11.5498	7.99062	4.64166	4.85014	7.5296	31.283	27.6108	47.6404	3.66998	5.94614	5.07582
BnaA01g15090D	0	0	0	0	0	0.05065	0	0.050572	0.191352	0	0.15282	0.027268	0.103894	0	0.048396	0	0.101549	0.050501	0	0.153014	0.049762	0.050773	0	0.050056	0	0
BnaA01g15100D	14.141	15.8754	14.4633	5.92647	4.77176	2.31016	3.60914	2.81544	11.882	14.3085	9.70261	6.62742	9.40469	12.6567	7.37779	6.72818	9.04749	6.46617	7.31921	11.5356	4.10962	2.86234	3.65453	10.1236	9.97076	9.65024
BnaA01g15110D	0.891291	0.862696	0.903315	0.852859	0.662979	0.141451	0.434722	0.336789	3.59578	3.71766	6.81404	1.94621	2.00762	1.74494	1.06091	0.983427	0.268969	0.269675	0.538593	0.727185	2.38726	1.79768	3.65337	0.139792	0.190325	0.397971
BnaA01g15120D	0.310437	0.496228	0.310918	0	0	0	0	0	0.112155	0	0	0	0.096566	0.117452	0.30031	1.07898	0.30112	0.314317	0.539089	0.189666	0.500342	1.60415	0.218675	0.816732	0.150729	0.322258
BnaA01g15130D	11.1102	11.476	8.47734	2.99466	2.27354	2.87132	2.76007	5.15188	5.28905	7.19067	7.99731	1.8631	2.3278	2.95937	6.46182	6.72972	7.14459	5.99547	7.41804	5.4519	3.00844	7.11939	2.77315	11.1473	9.03317	7.99482
BnaA01g15140D	1.57313	1.17241	1.59186	1.62733	1.65601	12.4954	11.021	11.9101	2.19992	1.81014	1.48378	1.7367	1.77855	2.17687	3.77463	6.67737	2.7086	0.582905	0.981192	1.20072	4.77334	3.28194	4.79111	1.58876	1.52931	1.34272
BnaA01g15150D	0	0	0	0.085249	0	0.649382	0.240539	0.332058	0	0	0	0	0	0	0	0	0	0	0	0.051296	0	0	0	0	0	0
BnaA01g15160D	0	0	0	0	0	1.63732	4.81168	8.84531	0	0	0	0	0.151829	0	0	0	0	0	0	0	0	0	0	0	0	0
BnaA01g15170D	0	0	0	0	0	0	0	0	0	0	0	0	0	0	0	0	0	0	0	0	0	0	0	0	0	0
BnaA01g15180D	1.06846	0.779692	0.731248	0.408326	0.10027	0.129584	0.181227	0.133756	1.10155	0.888537	0.597329	0.428584	0.183522	0.285313	0.118031	0.183005	0.089765	0.309785	0.203569	0.301636	0.050534	0.164538	0.188101	0.377415	0.144731	0.06535
BnaA01g15190D	0	0.006337	0	0	0	0.023835	0.005554	0	0	0	0	0	0	0	0	0	0	0	0	0	0	0.007809	0	0	0	0
BnaA01g15200D	0.082255	0	0	0	0	0	0	0	0	0	0.087829	0	0	0	0	0	0.262631	0	0	0.088728	0	0	0	0	0	0
BnaA01g15210D	0	0.29909	0.025902	0	0.054042	0	0.515881	0	0	0	0.132419	0.105665	0.052657	0	0	0	0.047882	0.080264	0	0	0	0	0	0	0	0.043496
BnaA01g15220D	0.435993	0.108863	0.564943	0.1767	0.084914	0.324862	0.556547	0.41517	0.149719	0.22114	0	0.055343	0.057465	0.088715	0	0	0	0.053258	0.243379	0.304124	0.109911	0.053585	0.043565	0.380434	0.608055	0.24656
BnaA01g15230D	0	0	0	0	0	0.833249	1.06216	0.877553	0	0	0	0.10079	0	0	0	0.05429	0	0.353899	0	0.163932	0.053432	0.109219	0	0.158547	0.092116	0.386556
BnaA01g15240D	0	0	0	0	0	0.082217	0.300186	0.206072	0	0.042716	0.043395	0.254048	0.088505	0.064847	0	0	0	0	0	0.043547	0.14828	0.086361	0.273204	0	0	0
BnaA01g15250D	34.0564	23.1681	34.7081	221.81	216.736	250.374	240.488	224.902	41.0947	42.0932	47.2252	135.523	125.135	163.535	97.0752	117.302	104.442	192.186	165.116	158.215	153.131	118.936	141.329	73.7357	76.7698	90.4303
BnaA01g15260D	0.317889	0	0.369166	0.776029	0.716007	0.806008	1.70582	0.661978	0	0	0	0.820029	0.777532	0.998149	0.75103	0.9622	0.784903	1.13773	1.41113	1.33777	0.652103	0.476249	0.380057	0.447363	0.267454	1.11323
BnaA01g15270D	0.17324	0.114462	0.130581	0.268682	0.257502	0.343682	0.183799	0.229733	0.569165	0.331774	1.136	0.365759	0.297242	0.288254	0.309435	0.293175	0.259731	0.14378	0.12605	0.047328	0.640082	0.814293	1.70987	0.115977	0.135879	0.071679
BnaA01g15280D	0	0	0	0	0	0	0	0	0	0	0	0.060848	0	0.020624	0	0	0	0.018064	0.028775	0	0.041671	0	0.060559	0	0	0.051553
BnaA01g15290D	0	0	0	0.653424	0	0	0	0	0	0	0.931964	0	0	0	0	0	0	0	0	0	0	0	0	0.729968	0	0
BnaA01g15300D	4.55423	5.12937	3.13716	2.17257	3.4149	22.8263	17.3855	16.0596	8.35462	10.4902	8.15835	33.3106	43.9064	31.4582	2.42827	2.76996	1.8996	8.08461	6.3803	7.24038	6.48027	4.42114	5.57581	6.71308	4.47304	5.43427
BnaA01g15310D	0.659035	0.160823	0.270568	0.346253	0.234103	2.01133	3.52919	3.86528	0.719694	0.800895	2.41906	1.66862	1.15073	1.08372	0.706345	1.43778	0.473757	0.899177	1.5997	1.5098	4.92881	3.32837	6.65753	0.64639	0.741662	0.683664
BnaA01g15320D	8.60867	5.57908	12.0687	5.67046	3.84306	22.3036	34.0116	37.7654	15.7836	12.8692	19.1944	1.68811	3.07475	4.23321	45.1611	39.4582	18.1554	0.930045	1.53763	0.920765	43.0207	28.2825	53.6333	7.19573	6.14176	6.58972
BnaA01g15330D	0.911426	0.728873	1.05163	0.606766	0.696224	1.69854	1.0568	1.72267	0.589619	0.551646	0.430915	0.133598	0.41027	0.606169	0.442899	0.403443	0.758292	0.303922	0.861314	0.612216	0.696055	0.452917	0.568221	1.008	0.801524	1.49174
BnaA01g15340D	0.31411	0.713285	0.009955	0	0	0.193145	0.049362	0.211618	0.779462	1.85649	0.34436	0.392057	0.760346	0.507727	0.078943	0.01437	0.001918	1.26649	0.289981	0.734831	0.042504	0.155112	0.278234	0.148395	0.133356	0.006511
BnaA01g15350D	3.31226	4.07416	2.17209	0.303	0.224995	3.71657	3.59586	3.19783	5.13804	22.3604	10.3493	2.14891	3.1879	2.92594	2.63851	0.759544	1.04924	6.32538	4.56803	6.83605	3.15434	1.8072	4.06179	2.3836	4.29984	2.13095
BnaA01g15360D	1.18107	1.43667	1.28756	0.955837	1.13238	7.03339	5.08924	5.06732	0.422248	1.42372	0.702551	1.29717	1.819	2.84255	1.37349	1.87952	0.997951	3.75045	3.81633	3.69464	3.40549	4.35837	4.80711	2.76865	2.72915	4.29683
BnaA01g15370D	0	0	0	0	0	0.053293	0	0	0	0	0	0	0	0	0	0	0	0	0	0	0	0	0	0	0	0
BnaA01g15380D	0	0	0	0	0	0	0	0	0	0	0	0	0	0	0	0	0	0	0	0	0	0	0	0	0	0
BnaA01g15390D	5.76621	6.30811	3.95156	3.82876	3.87697	6.80211	3.22994	5.12436	4.57573	5.10739	4.30405	9.0453	14.5843	12.0488	3.64992	5.32639	4.89168	5.50637	4.61389	6.36525	2.41529	3.69457	2.49798	6.0706	6.5118	11.8641
BnaA01g15400D	0	0	0	0	0	0	0	0	0	0	0	0	0	0	0	0	0	0	0	0	0	0	0	0	0	0
BnaA01g15410D	1.55993	0.645439	0.237835	0.039891	0.600813	2.16788	0.859384	0.345906	1.13188	0.122571	0.041186	0.248496	0.167007	0.424712	0.039524	0.062343	0	2.62279	1.14541	1.88514	0	0.083459	0	0.34904	1.2524	0.73428
BnaA01g15420D	0.037	0.11478	0.014454	0.101769	0.045389	0.907817	0.605167	0.634624	0.056787	0.11104	0.052712	0.635919	0.993191	0.519907	0.19703	0.104141	0.149466	0.298213	0.306052	0.314456	0.470451	0.205754	0.22557	0.177096	0.066849	0.248773
BnaA01g15430D	0	0	0	0	0	0	0	0	0	0	0	0	0	0	0	0	0	0	0	0	0	0	0	0	0	0
BnaA01g15440D	3.43229	3.77904	5.45116	9.85038	9.71654	14.4951	18.7848	14.1318	0.401338	0.390466	0	0.228923	0	0.922491	5.99984	2.71242	9.22578	1.50527	1.88517	1.41166	11.8208	14.7436	16.6482	9.78833	15.7109	13.291
BnaA01g15450D	8.78388	7.88407	7.58904	5.24594	5.62274	10.4957	10.6897	11.9906	6.40763	9.02372	6.68537	11.9322	13.4867	13.8471	6.47124	7.32423	6.57887	9.14682	7.35813	8.97897	7.29071	6.92768	7.76278	8.74173	8.28105	8.17777
BnaA01g15460D	0	0	0	0	0	0	0	0	0	0	0	0	0	0	0	0	0.179347	0	0	0	0	0	0	0	0	0
BnaA01g15470D	0.326896	0	0.304007	0.265631	1.8859	0	0	0.429808	0	0	0	0.09729	0	0.140503	0.628138	0.494821	0.539413	1.37429	2.29672	2.50239	0.978451	1.23971	1.33692	0.051675	0.772589	0.598747
BnaA01g15480D	0.336622	0.221903	0.397737	0.129361	0.038464	0.736648	0.359261	0.857151	0.149221	0.075127	0.229727	0.258582	0.174473	0.232513	0.570665	0.340885	0.436081	0.717468	0.98866	0.575175	0.546319	0.571548	0.441212	0.753843	0.913283	0.66498
BnaA01g15490D	14.8188	12.3409	17.7893	18.7234	14.9657	37.1752	42.7212	49.0061	13.509	16.4926	14.7939	8.05547	6.21436	7.96347	31.6873	25.3531	21.0037	7.21565	8.6669	9.86792	28.8568	29.3514	40.5556	12.6889	16.522	16.3508
BnaA01g15500D	0	0	0	0	0	0	0	0	0	0.000651	0	0.001245	0	0	0	0	0	0	0	0	0	0	0	0	0	0
BnaA01g15510D	12.4039	12.7622	12.5386	8.78437	10.0054	17.6814	13.296	15.5877	8.51475	13.0717	12.0253	17.1641	17.6032	19.1803	10.1065	10.0895	9.27043	16.6978	19.2624	22.5126	12.4945	11.2549	13.8714	13.9891	12.8922	12.6908
BnaA01g15520D	0	0	0.167458	0.553011	0	0.854413	1.00345	0.360871	0.282154	0.777175	0.936371	0.928187	0.056344	0.279146	0	0.19274	0.063768	0.232073	0.984043	0.615732	0.247142	0	0.150003	0.690087	0.2729	0.316212
BnaA01g15530D	0	0	0	0	0.105075	0	0	0	0	0	0.092155	0	0	0	0	0	0	0	0.154352	0.005086	0	0	0.152207	0	0	0
BnaA01g15540D	0	0	0	0.124164	0.081572	0.135746	0.121578	0.047326	0	0	0	0	0.050042	0	0	0.048544	0	0	0	0.043903	0.044719	0.048912	0.035158	0	0	0.049298
BnaA01g15550D	0.736841	1.79261	0.471238	11.0675	12.4121	20.0124	21.197	16.9891	28.5271	21.7768	20.983	54.7929	40.2837	35.2472	3.54971	5.78818	4.12687	11.44	7.38776	8.98986	14.9535	9.7806	12.1869	2.76843	2.87534	2.41985
BnaA01g15560D	2.51584	2.95024	2.13972	1.7964	1.62735	4.09244	3.98167	4.56226	2.09822	3.42818	1.99907	11.6736	12.1869	9.85497	1.63148	2.2246	1.80593	4.05724	3.98997	3.3237	1.94583	1.8426	1.62661	3.108	3.03545	2.9258
BnaA01g15570D	0	0	0	0	0	0	0	0	0	0	0	0	0	0	0	0	0	0	0	0	0	0	0	0	0	0
BnaA01g15580D	0	0	0	0	0	0	0	0	0	0	0	0	0	0	0	0	0	0	0	0	0	0	0	0	0	0
BnaA01g15590D	2.90464	2.55793	4.06884	2.72427	2.65258	6.86376	6.05083	9.52456	3.11414	2.84987	2.65411	2.25361	1.93512	1.57651	4.72786	4.50363	3.29653	2.2321	2.84916	2.27081	4.39598	5.12483	5.86486	3.21342	3.22444	3.14331
BnaA01g15600D	1.96143	2.16755	1.50313	2.32925	2.42107	2.52327	2.89432	2.29054	2.82911	2.71575	3.05012	2.90476	4.88807	3.70883	1.70316	1.40497	1.50825	2.42688	2.01606	2.17867	1.86742	1.74251	1.82457	1.87912	2.38166	2.22642
BnaA01g15610D	0.256873	0.388191	0.669503	0.924036	0.846963	1.82955	2.03773	1.06015	0.339173	0.8446	0.76326	0.807457	0.640027	0.770934	0.939625	0.520811	0.579036	1.62515	1.57067	0.606095	1.40565	1.4406	1.66056	0.793613	0.934674	1.11624
BnaA01g15620D	15.0268	14.4024	12.24	7.40547	9.65715	11.2279	12.0831	15.4344	10.2505	8.04621	5.27927	12.7195	11.0037	12.5717	12.1327	13.1281	11.7575	16.2194	18.9141	17.9225	12.7491	8.28073	9.84393	10.1627	11.968	11.9002
BnaA01g15630D	3.64092	2.05703	4.623	1.89515	1.68632	4.26494	3.53889	5.20732	3.11452	2.70925	2.23504	4.43558	5.5304	2.94956	12.0079	12.4089	4.81216	2.40575	3.04953	2.27638	5.41646	3.2393	6.83484	2.44087	1.41015	1.87426
BnaA01g15640D	32.952	18.8955	48.3403	57.849	53.9615	63.6507	132.761	131.836	19.7698	33.7242	15.2106	3.51625	3.14196	3.4951	303.542	345.701	60.7431	1.32711	3.01866	2.13889	30.6893	13.086	44.2717	17.8757	26.1056	28.3865
BnaA01g15650D	5.55754	6.73147	6.92615	1.78892	2.35886	0.61285	0.61414	1.25628	3.40528	4.5448	3.28937	3.28214	2.81696	1.86977	13.4328	8.10434	10.3034	9.55582	11.0122	7.62489	2.61594	3.82967	1.66041	9.43636	8.9382	7.09076
BnaA01g15660D	4.23939	6.3176	6.50019	1.32545	1.97363	0.828816	1.78443	2.4647	3.80066	3.72665	1.76799	4.23414	2.66785	2.97858	12.483	6.58897	11.5045	9.95302	10.2457	6.36076	1.85814	3.47932	1.25991	8.52488	7.62113	6.90331
BnaA01g15670D	0.707581	1.61979	0.848118	1.28092	0.536522	3.33991	2.60719	2.26169	0.702145	0.377574	0.503483	3.28376	2.14368	2.78628	0.881263	1.72087	1.00089	2.2278	2.12288	3.00078	2.08191	2.72147	2.62456	1.41858	1.50506	2.1816
BnaA01g15680D	0	0	0	0	0	0	0	0	0	0	0	0	0	0	0	0	0	0.04016	0	0	0	0	0.037045	0	0	0
BnaA01g15690D	6.58557	6.31851	7.36913	5.01506	5.08995	17.5117	13.3728	16.565	8.86719	9.25254	6.56274	13.8644	14.6065	12.5355	6.63979	6.88985	6.29627	13.9151	9.43161	11.7801	10.3102	9.0722	7.0707	9.94601	8.4335	8.89768
BnaA01g15700D	0.425826	0.273708	0.255823	0.263416	0.150992	0.934769	0.650003	0.644532	0.669229	0.34399	0.072086	0.22416	0.282352	0.232737	0.4552	0.229635	0.77755	0.147615	0.697572	0.307086	0.700432	0.217177	0.22365	0.56635	0.839074	0.774539
BnaA01g15710D	0	0	0.024854	0	0	0	0.02609	0	0	0	0.016318	0.04788	0.026363	0.026445	0.012095	0	0	0.012836	0	0.038893	0	0.012905	0.025688	0	0	0
BnaA01g15720D	0.80249	1.05037	0.80366	0.065702	0.220737	0.912818	0.661965	0.800858	0.648437	0.546924	0.442622	5.32994	8.15418	5.02999	0.211683	0.463115	0.046496	0.937977	1.66412	1.38011	0.231817	0.318662	0.223432	0.679722	0.626199	0.649073
BnaA01g15730D	2.41429	2.46829	1.48574	0.329323	0.221615	0.522733	0.302027	0.645777	1.80016	3.75213	2.92791	2.11955	1.5234	1.61641	0.581481	0.245178	0.662068	0.987993	0.98907	1.212	0.873683	1.22628	0.737065	1.63336	2.13217	2.00792
BnaA01g15740D	2.43814	2.0163	2.87155	2.98221	2.83135	3.08436	3.33578	4.16259	2.20917	2.53132	1.99245	1.49425	2.06094	2.32981	1.56416	2.05055	1.85979	2.55321	3.98288	2.84836	2.51389	4.62455	4.20337	4.18828	3.88049	4.88437
BnaA01g15750D	0	0	0	0	0	0	0.080822	0	0	0	0	0	0	0	0	0	0	0	0	0	0	0	0	0	0	0
BnaA01g15760D	2.6669	3.46794	3.73681	2.34439	1.72834	2.69625	2.16482	2.4286	3.57965	4.36301	2.66975	2.77938	3.50208	3.23111	1.88261	1.63312	2.15781	3.67437	2.95823	3.65457	2.74958	2.33572	3.14589	4.08713	3.32148	4.51776
BnaA01g15770D	0.059416	0.241891	0.103163	0	0.053214	0.134556	0.152443	0.093021	0.112735	0.094898	0.073463	0.055821	0	0	0.073099	0.037867	0	0.038331	0	0	0.187593	0.038539	0.057532	0.075987	0.133809	0.097516
BnaA01g15780D	1.46599	1.30794	0.919346	0.8059	1.19756	13.5816	8.84068	17.1666	1.66188	2.23274	0.889918	4.94876	4.78953	5.05938	6.59299	11.9065	2.93488	0.333147	0.482559	0.515739	2.47004	2.32876	3.33676	0.793239	0.529631	0.971201
BnaA01g15790D	0.522677	1.45974	0.873335	0.355536	0	0	0.284703	0.229444	0	0.628486	0	1.43547	1.27635	3.63506	0.463293	0.278935	0.396539	0.331649	1.05438	0.760369	0.073194	0	0	0	0	0.153717
BnaA01g15800D	0.315716	0.279677	0.457637	0.409882	0.251953	0.785047	0.970445	1.21424	0.277008	0.238714	0.195835	0.58434	0.550883	0.494118	0.308365	0.295583	0.297127	0.510395	0.519673	0.4844	0.572527	0.619307	0.703122	0.649184	0.557435	0.656335
BnaA01g15810D	5.90299	8.1755	5.47516	5.91513	5.69451	0.908204	0.829018	1.55467	8.66319	11.8593	19.2751	6.71324	7.8892	0	34.0871	37.3609	6.94111	7.35082	2.82167	2.42755	2.51741	2.07477	0	4.30138	4.24261	2.7599
BnaA01g15820D	1.38331	1.20166	1.48818	5.08268	5.754	9.07683	9.99417	7.83806	1.39992	1.59881	1.45198	3.55667	2.9988	2.84748	4.37984	3.78136	4.01781	3.58027	2.14716	2.74997	5.08191	4.31496	5.89023	2.29267	2.08602	2.52955
BnaA01g15830D	0	0	0	0	0.635703	0	1.25437	0	0	0	0	0	0	0	0	0	0	0	0	0	0.273925	0.139748	0	0	0	0
BnaA01g15840D	5.12918	5.43074	4.45161	2.16326	1.88968	4.55626	4.53976	5.42494	5.39089	6.95662	4.4413	8.53316	10.0873	7.25133	3.48386	2.27305	3.00083	5.80244	6.55459	6.36566	3.79091	4.7341	3.2448	7.16456	6.37271	6.50765
BnaA01g15850D	0	0	0	0	0	0	0	0	0	0	0	0	0	0	0	0	0	0	0	0	0	0	0	0	0	0
BnaA01g15860D	0.028704	0	0.028034	0	0.120861	0.103781	0.115066	0	0.085356	0	0	0.080037	0.027702	0.174351	0	0.027065	0	0	0	0.242361	0	0	0.05119	0.1239	0.115226	0
BnaA01g15870D	2.94886	3.00744	3.39297	5.63262	4.38893	14.0351	12.4432	11.9202	6.43532	5.27139	5.23689	13.0326	11.959	11.1219	3.68122	3.53579	3.70167	7.44844	6.92392	7.51672	8.99786	7.34871	10.2445	4.71103	4.79526	5.11403
BnaA01g15880D	0	0	0	0.218056	0.357992	0	0	0	0.812208	0.31354	0.612839	0.135801	0.224919	0	0	0	0	0.031659	0	0	0.031092	0	0	0	0	0
BnaA01g15890D	0.037205	0	0	0	0	0.037897	0.04864	0.046128	0	0	0	0.111299	0.058302	0	0	0	0	0	0	0	0	0	0	0	0	0
BnaA01g15900D	2.89735	3.79112	2.80962	0.361578	0.583814	0.705742	1.25905	1.76345	2.28324	2.53305	0.723887	7.67512	8.79504	7.84459	1.17294	2.68144	0.730869	4.38319	5.51074	6.85575	1.00254	1.66897	0.813732	2.50746	1.58854	2.26166
BnaA01g15910D	11.1808	12.1936	7.43974	0.615457	0.580826	0.037533	0.105219	0	0.307914	0.071962	0.037748	0.074021	0.076731	0.308386	3.46271	4.97164	6.91032	1.87809	2.20356	1.57669	0.367762	0.759009	0.074641	6.74758	3.86897	3.79692
BnaA01g15920D	0.05726	0.120849	0.031523	0	0	0	0	0.050571	0	0	0	0.171999	0.367867	0.348915	0	0.07904	0	0	0.127021	0.128186	0	0	0.10679	0.048683	0	0.168932
BnaA01g15930D	0	0.372288	0.279772	0.086365	0	0.267764	0.254766	0	0.695996	0.056405	0.178635	0.314284	1.08304	0.482339	0	0	0.310308	0.289197	0.154777	0.251989	0	0.48524	0.089047	0.22052	0.065491	0.077426
BnaA01g15940D	26.9167	28.7177	24.3384	18.8978	19.9854	30.9	30.1848	27.1837	30.6179	28.8818	23.3345	30.4344	37.6257	36.9198	15.4959	19.3715	19.8833	17.8477	21.253	16.623	19.9462	20.9307	18.1929	26.28	27.0919	34.5721
BnaA01g15950D	244.775	410.094	265.968	34.1648	46.4742	23.6406	39.7811	25.3035	728.777	642.221	418.843	49.4236	110.151	57.0119	42.6155	31.8087	44.7491	249.771	208.188	349.623	26.2573	49.2976	18.2135	163.403	246.489	149.551
BnaA01g15960D	23.8546	24.1959	24.3329	23.282	18.3098	10.6019	14.9265	8.65722	37.1083	42.788	37.0383	17.6646	18.4861	18.6738	24.2388	20.6846	21.7457	33.755	30.4169	34.8421	21.5051	18.89	15.8793	27.0085	28.7574	29.8767
BnaA01g15970D	0	0	0	0	0	0	0	0	0	0	0	0	0	0	0	0	0	0	0	0	0	0	0	0	0	0
BnaA01g15980D	0	0	0	0.061098	0.038187	0.127279	0.086027	0.127225	0.041702	0.261791	0.126115	0.083999	0.04361	0	0	0.084609	0	0.042395	0	0	0	0	0	0	0.308323	0
BnaA01g15990D	0.400305	0.819577	0.721151	0.69681	0.816324	3.33888	5.89241	3.1284	0.465149	0.168289	0.274382	1.3909	0.566069	1.21133	1.13047	0.762096	0.370265	1.42285	0.797465	0.347355	1.81645	1.92491	3.08614	1.00796	0.790204	0.947923
BnaA01g16000D	1.8432	1.88854	1.649	1.28521	1.00591	0	0	0	0.912156	0	0	0.28512	0	0	0.660565	0.932534	0.476327	1.29106	1.64621	0	0	0	0.791362	0.817722	0	0.587811
BnaA01g16010D	0	0	0	0	0	0	0	0	0	0	0	0	0	0	0	0	0	0	0	0	0	0	0	0.051082	0	0
BnaA01g16020D	0.297798	0.271144	0.297531	0.121588	0.0536	0.159685	0.050967	0.200618	0.504504	0.489784	0.10671	0.510221	0.661753	0.43259	0.074958	0.168675	0.239176	0.462968	0.680265	0.392139	0.198452	0.106717	0.049395	0.148533	0.228772	0.288229
BnaA01g16030D	0.254356	0.378528	0.27266	0.067418	0.097323	0.146623	0.217218	0.370254	0.170418	0.375499	0.227175	0.669988	1.00924	0.654303	0.187672	0.119708	0.042005	0.329905	0.508076	0.522869	0.288029	0.222785	0.204626	0.470728	0.193277	0.226235
BnaA01g16040D	0	0	0	0	0	0	0.002912	0.087719	0	0.002158	0.028941	0	0.194686	0	0	0	0	0	0	0.024245	0	0	0.004559	0.024373	0	0
BnaA01g16050D	1.06413	1.29575	0.980906	0.438899	0.303945	2.0451	1.71797	1.85519	1.38959	1.16156	1.40841	3.67092	4.26045	3.5663	1.01216	1.62212	1.20887	1.71223	1.30062	1.88101	1.95904	1.68047	1.73598	1.7947	1.86355	1.66326
BnaA01g16060D	0.209425	0.51522	0.200672	0.169684	0.935286	0.291572	0.096882	0.31005	2.00079	0.202209	0.340279	0.625741	0.297538	0.505893	0.350472	0.163841	2.26638	0.849401	0.491124	0.46629	1.38405	2.42473	0.310215	1.58278	0.003009	0.109341
BnaA01g16070D	0	0	0	0	0	0	0	0	0	0	0	0	0	0	0	0	0	0	0	0	0	0	0	0	0	0
BnaA01g16080D	0	0.043032	0.026814	0.030534	0.035265	0.027181	0.042016	0	0	0	0	0	0.037922	0.031458	0.023248	0	0.028967	0.023103	0	0.069079	0.046124	0.028024	0.092107	0	0	0.025841
BnaA01g16090D	37.2522	42.2734	32.0916	10.3107	9.67616	2.10793	3.45739	2.36039	53.9094	78.4784	44.3237	4.84157	6.15994	8.15412	9.16345	4.58407	15.4148	24.2563	13.5419	17.9301	6.49014	4.11338	2.1219	19.8326	24.1729	22.159
BnaA01g16100D	0.364374	0.226924	0.171015	0.421161	1.46097	0.322507	0.23023	0.210445	0.098202	0.811108	0.356043	0.463726	0.17009	0.108938	0.412943	0.199834	0.485791	0.802877	0.381679	0.521333	0.269223	0.448166	0.162686	0.489635	0.132495	0.383076
BnaA01g16110D	0.025604	0.018818	0.018359	0.017204	0	0.066779	0.004698	0.049444	0.05149	0.061916	0.054739	0.050209	0	0.028525	0.011895	0	0.008515	0.014054	0	0.006157	0	0.039059	0.058904	0	0.001036	0.000573
BnaA01g16120D	0	0	0	0	0	0	0	0	0	0	0	0	0	0	0	0	0	0	0	0	0	0	0	0	0	0
BnaA01g16130D	23.3782	33.6964	13.9219	8.03271	12.0639	19.0457	18.2851	27.0815	36.7763	37.357	24.5765	105.384	107.534	133.834	14.8198	16.8671	11.8448	51.1317	35.9864	43.8842	10.1191	16.9667	9.19471	38.9579	35.8881	47.836
BnaA01g16140D	1.20411	0.635128	1.5205	4.27	4.07725	12.4454	14.1418	12.9309	1.12931	1.11496	3.41461	0.964702	0.6418	1.15988	2.57724	3.4216	1.87975	0.805694	1.24848	1.19028	8.0975	5.84652	11.4202	2.60491	3.07536	3.22232
BnaA01g16150D	0	0	0	0	0	0	0	0	0	0	0	0	0	0	0	0	0	0	0	0	0	0	0	0	0	0
BnaA01g16160D	0.194145	0	0	0.060495	0.124844	0.480862	0.906468	1.08114	0.06783	0.182347	0.091738	0.263953	0.320367	0.162704	0.18266	0.157297	0.34663	0.152054	0.382369	0.126201	0.369819	0.357261	0	0.448845	0.312646	0.257429
BnaA01g16170D	25.968	35.7441	26.5037	24.4697	25.7555	46.9415	41.0136	48.0663	31.4763	29.8011	27.1739	40.6836	40.0657	45.8809	28.2478	22.2284	27.927	44.0997	28.9796	32.7733	32.3677	30.9827	28.8713	28.8897	29.988	33.2106
BnaA01g16180D	0	0	0	0	0	0	0	0	0	0	0	0.628924	0	0	0	0	0	0	0	0	0	0	0	0	0	0
BnaA01g16190D	0	0	0	0	0	0	0	0	0	0	0	0	0	0	0	0	0	0	0	0	0	0	0	0	0	0
BnaA01g16200D	0	0	0	0	0	3.81267	0	0	0.359746	0	3.18277	0	0.267168	0	0	0	0	0	0	0	0	0	0	0	0	0
BnaA01g16210D	0	0	0	0	0	0	0	0	0	0	0	0	0	0	0	0	0	0	0	0	0	0	0	0	0	0
BnaA01g16220D	0	0	0	0	0	2.21202	1.82167	0	2.50659	0	1.70546	1.22497	0.94785	0.980253	0	0	0	0	0	2.3852	0	0	2.20887	1.42198	1.47687	0
BnaA01g16230D	0.315474	0	0	0.223399	0.162924	3.70111	3.3992	0	3.42042	0.216726	1.91727	2.96095	1.48018	2.71772	0.300665	0.172936	0.145396	0.24993	0	3.22929	0	0.20586	3.86851	3.45713	3.22171	0
BnaA01g16240D	1.24019	1.10227	1.19949	0.260472	0.269913	0.492549	0.185572	0.69066	0.439947	0.460907	0.219463	0.105042	0.18094	0.293634	0.486645	0.991735	0.757907	0.678302	2.38921	1.43467	0.389723	0.375693	0.306216	2.80357	1.82475	1.76563
BnaA01g16250D	1.12525	1.6633	1.27869	1.47688	0.780963	2.98802	2.44236	2.62523	0.742945	1.44424	1.08732	1.06285	0.914512	1.68421	0.887406	1.12464	1.11066	1.37927	1.41735	1.76735	1.5963	1.29128	2.11219	2.4314	2.70268	1.98202
BnaA01g16260D	1.51573	0.788983	1.44991	1.51322	1.89878	0.019956	0.200457	0.223629	1.56228	0.522828	1.70793	0.717297	1.06634	1.13466	1.55618	2.13417	1.21594	1.94522	3.36031	2.1037	0.856133	2.25567	1.38882	1.90364	1.51553	1.16211
BnaA01g16270D	29.2559	29.2367	32.05	20.2527	20.0746	62.563	51.0219	68.8698	31.6075	28.7292	22.2474	22.4414	14.235	21.6671	36.933	34.4827	37.2678	55.6014	52.1053	50.5607	43.2909	42.0107	31.5512	52.7665	47.093	46.6037
BnaA01g16280D	1.79771	1.33628	1.05382	0.108257	0.198714	0.166231	0.354107	0.622134	0.306688	0.712322	0.451203	0.518589	0.689549	0.76715	1.46643	4.09384	1.58405	2.01105	2.54291	2.4703	0.729351	1.40074	0.481521	5.07293	4.73391	3.48742
BnaA01g16290D	0	0	0	0	0	0	0	0	0	0	0	0	0	0	0	0	0	0	0	0	0	0	0	0	0	0
BnaA01g16300D	0	0.031443	0	0	0.105023	0.090411	0	0.032317	0	0.121692	0.143587	0	0	0	0	0	0	0	0	0	0.043566	0	0	0	0	0
BnaA01g16310D	4.04286	3.58881	1.97492	0.510824	0.71564	0.398049	0.173854	0.715188	2.24684	1.9435	1.74902	53.314	55.0727	4.87852	9.58836	11.2685	13.3203	7.7599	12.1301	6.74113	1.00637	0.853157	1.79726	1.0021	1.30772	1.26758
BnaA01g16320D	0	0	0	0.011674	0	0	0	0	0	0	0	0	0	0	0	0	0	0	0	0	0	0.091729	0	0	0	0
BnaA01g16330D	2.87875	2.37799	2.35427	1.10888	0.547821	1.26503	2.51834	1.69938	6.43751	5.29883	11.2255	0.915692	0.606445	0.39959	2.62663	5.04532	0.627032	0.189628	0.717669	0.410062	4.55288	7.76915	6.76426	0.384122	0.62353	1.37492
BnaA01g16340D	2.05457	1.00795	1.54488	0.691933	1.11795	0.928223	1.16188	0.993281	4.17775	3.77433	6.78792	0.899752	0.157301	0.251506	1.43737	3.35088	0.5732	0.08088	0.445374	0	2.10314	4.47169	4.09696	0	0.208397	1.07756
BnaA01g16350D	0	0	0	0	0	0	0	0	0.041571	0	0	0	0.134398	0	0	0	0	0	0	0	0	0	0	0	0	0
BnaA01g16360D	0.914894	0	1.11859	0.741522	0	0	0	0	0	0	0	1.41338	0	0	0.78547	0	0.542717	0	0	0	0	0	0	0	0.489569	0
BnaA01g16370D	5.56064	5.80046	4.79695	46.2687	48.7285	6.242	13.7109	7.9163	41.3934	46.5129	34.4538	43.5177	29.1268	29.6568	3.95667	3.28737	5.16248	18.6679	16.4172	18.0981	17.3135	14.4492	13.2878	8.19265	11.5685	10.4677
BnaA01g16380D	43.3311	65.4054	38.5534	44.4755	36.2168	1.81375	2.74402	0	214.454	378.685	207.616	12.6082	14.9823	11.8492	19.0751	6.83583	44.9356	76.8434	66.9673	60.3349	18.2106	10.2191	4.3412	135.546	130.977	113.211
BnaA01g16390D	2.0269	1.96568	1.66605	0.983383	1.58549	5.29824	5.23978	3.51794	3.50258	3.59546	3.69154	7.60945	10.8498	8.26252	1.76752	1.2613	1.69209	2.94184	5.36886	4.98013	2.84589	4.47495	3.32676	3.09254	3.63882	4.3144
BnaA01g16400D	0.655305	1.10791	1.08749	124.633	117.385	34.6827	90.7791	33.0447	11.3134	35.2669	12.1525	17.4216	16.6392	15.8403	5.29464	5.28177	7.14888	17.1677	14.9816	19.2217	15.173	8.83154	12.8132	1.8502	2.19929	2.18748
BnaA01g16410D	0	0	0	0	0.028009	0	0	0	0	0	0	0	0.028983	0.029121	0	0	0	0	0	0	0	0	0	0	0	0
BnaA01g16420D	12.8084	12.3368	11.5237	4.89843	5.01932	5.54126	4.85973	7.55555	18.2497	16.4611	17.9257	9.79514	10.4094	6.47554	35.1947	30.0504	22.111	15.2874	13.6199	13.079	9.06492	10.313	7.844	12.0991	11.7078	9.4579
BnaA01g16430D	3.22331	2.69963	2.27229	2.56678	2.24779	6.1028	6.2325	5.50726	3.26053	3.34776	2.22207	3.81092	2.31575	2.32313	4.25037	3.38583	4.83172	2.07953	5.49482	4.0891	4.82999	4.51036	5.46225	4.50379	5.46354	6.33508
BnaA01g16440D	34.1671	38.4728	44.3438	16.1735	13.8139	3.62603	5.48617	14.4852	12.6705	14.376	13.3642	3.13622	2.87266	2.75765	45.0685	75.2981	39.2112	1.65357	3.16824	2.5582	16.0702	12.7189	12.373	13.8546	11.8646	10.5326
BnaA01g16450D	4.13877	4.10436	4.50546	49.3317	44.2029	223.313	148.49	133.617	2.70986	3.72915	4.52799	1.20402	0.732657	1.99711	20.1468	7.58784	14.9343	2.97258	3.30607	2.31227	143.182	85.9591	169.173	3.88441	12.5265	13.7207
BnaA01g16460D	0.049715	0.08926	0.057749	2.05274	1.58336	4.21411	7.26175	4.19423	0	0.041219	0.05059	0.173732	0.092962	0.321557	0.68354	0.181859	0.15563	0.226101	0.214558	0.331258	0.902071	0.816204	0.556933	0.490655	0.469097	1.08555
BnaA01g16470D	0.297084	0.178563	0.132866	0.387504	0.202582	1.31721	0.84169	0.585712	0.1391	0.101616	0.305888	0.170632	0.179213	0.124684	0.137038	0.145034	0.23929	0.085617	0.136693	0.316134	1.45732	0.111553	0.119284	0.180817	0.074442	0.252275
BnaA01g16480D	0.059169	0	0	0	0.120975	0	0	0	0	0	0	0	0	0	0.114794	0	0	0	0	0.354879	0	0	0	0	0	0
BnaA01g16490D	1.70211	2.12292	0.770316	0.331971	0.552989	0.575676	0.505931	0.712086	1.50424	1.43693	0.858473	13.1004	18.4581	17.7064	0.221079	0.630119	0.173998	1.06316	1.34991	2.85226	0.049832	0.631019	0.057722	0.832325	0.344502	0.398868
BnaA01g16500D	0	0	0	0	0	0	0	0	0	0	0	0	0	0	0	0	0	0	0	0	0	0	0	0	0	0
BnaA01g16510D	0	0	0.042583	0	0	0.068083	0.022919	0.135956	0	0	0	0	0.046551	0	0	0	0.1284	0	0.152323	0.087953	0.064956	0.134981	0	0	0	0.132029
BnaA01g16520D	0.741922	0.750753	0.542998	1.84773	1.9803	5.25272	4.55123	5.00433	0.878456	1.05503	0.724726	5.93292	4.82832	4.04199	0.929034	0.567184	1.54682	2.86081	3.37031	3.12173	2.84834	2.67332	2.31726	2.34376	2.25725	2.16427
BnaA01g16530D	30.0089	31.0937	26.4656	168.115	175.253	338.075	228.187	356.435	95.1827	65.4058	59.7775	405.631	284.925	318.464	76.8182	62.6784	96.7626	267.341	225.034	246.657	109.472	90.9823	97.0189	156.456	158.106	161.161
BnaA01g16540D	1.41636	1.40372	1.05662	0.44169	0.760871	0.5458	0.908754	0.644467	1.45182	2.14663	1.29619	1.13216	1.6644	1.65744	0.474847	0.572004	0.654774	0.887793	1.14952	0.694415	0.67199	0.601794	0.615656	0.831775	1.01174	0.914974
BnaA01g16550D	0	0	0	0	0	0	0	0	0	0	0	0	0	0	0	0	0	0	0	0	0	0	0	0	0	0
BnaA01g16560D	8.47715	7.51218	6.28525	5.11762	4.728	3.9888	3.52309	5.22747	6.84155	9.53628	4.66008	18.8462	21.4178	24.1888	3.44955	5.51861	3.01333	7.67185	9.40581	9.29094	2.59797	2.92235	1.77889	5.14148	3.64012	4.36666
BnaA01g16570D	0	0	0	0	0	0	0	0	0	0	0	0	0	0	0	0	0	0	0	0	0	0	0	0	0	0
BnaA01g16580D	0	0	0	0	0	0	0	0	0	0	0	0	0	0	0	0	0	0	0	0	0	0	0	0	0	0
BnaA01g16590D	0.573612	0	0.11875	0	0	0	0	0	0	0.123859	0	0	0	0	0	0.107683	0	0	0.122529	0	0	0	0	0	0	0
BnaA01g16600D	12.8797	14.546	12.7316	8.80889	6.46545	15.444	17.985	17.4556	7.31632	7.51682	5.64533	3.54513	4.69355	5.49036	12.2769	9.63729	11.3341	13.0081	9.54712	9.80098	13.3088	10.7172	12.1296	16.3263	16.8236	14.1825
BnaA01g16610D	7.66995	8.08384	6.55519	1.43192	1.19166	3.40483	4.37232	4.73506	3.65861	6.69016	5.08354	3.9031	3.56121	2.60334	2.26231	2.74526	3.11567	4.38687	3.9163	3.67616	3.81808	2.5305	2.54033	7.52525	6.08226	7.40599
BnaA01g16620D	2.8279	1.33683	1.37538	4.87696	1.88296	1.98171	2.22648	1.81868	3.21648	2.53308	5.22056	4.51366	4.22147	3.00473	2.90108	3.92194	3.31682	5.72018	4.59652	6.14019	6.49804	12.8939	11.6813	1.54957	2.25968	4.21754
BnaA01g16630D	1.8423	1.37291	1.14334	3.16656	2.64466	7.28754	6.75249	4.93855	2.13995	2.09351	2.04993	2.44439	2.22858	4.38157	3.51014	3.08137	1.85603	3.12695	3.5804	3.10995	7.67533	6.23768	9.65053	3.74504	4.37015	3.14201
BnaA01g16640D	3.95052	2.91097	2.83325	7.17736	5.14734	10.7788	8.63597	9.34104	2.17965	2.50775	2.89622	3.98574	3.29298	5.69014	4.11278	4.02348	4.44819	5.07898	4.14387	3.90686	6.28715	6.80842	6.40058	4.69576	4.48595	7.29255
BnaA01g16650D	0.475984	0.738286	0.777005	0.291639	0.41778	0.398854	0.286302	1.1141	0.765153	1.05627	0.367774	0.589214	0.626571	0.385858	1.03443	0.838241	0.524582	0.374711	1.14466	0.285571	0.547816	0.376234	0.216073	1.71175	1.05496	0.980467
BnaA01g16660D	7.569	8.49598	7.17222	8.87771	9.52763	27.9148	19.2404	23.687	13.0559	18.5235	10.6016	15.9978	13.7494	13.7233	5.97115	5.53204	6.87476	22.3284	18.3039	19.3806	13.9135	13.8685	15.6532	18.8176	16.3905	20.7828
BnaA01g16670D	0.042691	0	0	0.062133	0.043788	0.449595	0.304925	0.216347	0.210963	0.128718	0.043588	0.042808	0	0.177898	0	0.086237	0.048337	0.210872	0.248153	0.150489	0.085158	0.043445	0	0.240884	0.086115	0.073418
BnaA01g16680D	0.077675	0.223452	0.075862	0	0.156429	0.078592	0	0	0.308313	0.275907	0.158085	0.297317	0	0	0	0	0.12423	0	0	0	0	0	0	0	0	0
BnaA01g16690D	0	0	0	0	0	0	0	0	0	0	0	0	0	0	0	0	0	0	0	0	0	0	0	0	0	0
BnaA01g16700D	0.656163	1.00287	0.349293	0.220538	3.43363	0.180204	0.094321	0.526728	1.87386	2.92789	0.745116	0.332533	0.546407	0.956505	0.184831	1.42521	0.144121	1.20511	2.39581	1.13459	0.363647	0.183189	0.090496	0.655	0.240759	0.64097
BnaA01g16710D	1.75625	1.81324	1.25783	0.79199	1.37741	1.27286	1.12426	2.47937	1.14045	1.79103	2.0935	0.607011	0.435435	0.518011	0.691033	1.8515	1.0797	0.692211	2.10779	0.750691	0.670918	1.00219	1.52603	2.5752	1.60309	1.15461
BnaA01g16720D	1.94605	1.73245	1.78759	0.793312	1.30643	1.5968	2.09248	1.73242	2.67244	3.32636	3.13861	2.79863	3.34781	3.14085	1.88983	1.42512	1.43246	2.28121	2.09	2.39847	2.80083	1.51136	1.93267	2.80646	2.44833	2.61085
BnaA01g16730D	0	0	0	0	0.265881	0	0	0	0	0.261109	0	1.82759	1.27448	0.519287	0	0	0	0.262966	0.341822	0.087841	0.172746	0	0	0	0	0
BnaA01g16740D	0.042307	0	0	0	0	0	0.091016	0	0	0	0	0.839169	0.375586	0	0	0.094899	0	0.171885	0	0	0.093832	0	0	0.070912	0	0
BnaA01g16750D	2.47738	2.43491	2.20749	1.38688	1.75727	3.26965	2.49653	4.0908	3.93288	3.14858	2.27771	5.77015	5.55974	5.9101	1.66327	1.40987	1.72366	3.75138	4.40254	3.20648	2.86382	2.83318	2.98335	3.16988	3.27467	3.37304
BnaA01g16760D	0.03547	0	0	0.202419	0	0	0.109462	0	0	0	0	0	0	0	0	0	0	0	0	0	0	0	0	0	0	0
BnaA01g16770D	0.024494	0.02237	0.017719	0.074707	0.817291	0.225466	0.046633	0.567397	0.020913	1.3088	0.033042	0.041285	0.387925	0.188223	0.028305	1.04113	0.037908	0.048046	1.1098	0.022028	0	0.883886	0.036094	0.106732	0.01916	0.040948
BnaA01g16780D	0.146616	0.120558	0.124972	0.031698	0.045139	0.035368	0.127595	0	0.878706	0.336869	0.27309	0.276557	0.414098	0.205445	0.109866	0.175343	0.042991	0.119981	0.191878	0.198642	0.054367	0.067867	0.190508	0.112935	0.04389	0.018466
BnaA01g16790D	0	0.00413	0	0	0	0	0	0	0	0	0	0	0	0	0	0	0	0	0	0.023016	0	0	0	0	0.003148	0.021592
BnaA01g16800D	0	0.275609	0	0.101579	0.10571	0.1556	0.366978	0	0	0	0	0	0	0	0	0.089415	0	0	0.180635	0.076489	0	0	0.063567	0.147147	0.150591	0.134415
BnaA01g16810D	0	0	0.148021	0	0.352953	0	0	0	0	0	0	0	0	0	0.309397	0	0	0	0	0	0	0	0	0.222205	0	0
BnaA01g16820D	0	0	0	0	0	0	0	0	0	0	0	0	0	0	0	0	0	0	0	0	0	0	0	0	0	0
BnaA01g16830D	1.86262	2.32607	2.1567	2.32512	1.42208	10.7191	8.24155	11.107	1.8278	2.61387	1.13488	0.961141	0.566588	1.19429	3.94752	2.64008	2.06892	0.659139	0.422912	0.644282	2.64254	1.70366	3.71187	1.20242	1.39308	2.38569
BnaA01g16840D	0	0.052202	0	0	0	54.1161	33.5676	33.5594	0	0	0	0.121095	0	0.204628	0	0	0	0.082243	0	0.12414	0.336571	0.930782	1.14781	2.11324	2.15681	2.17791
BnaA01g16850D	9.4927	11.0471	7.75841	1.44526	0.882749	1.45342	1.17963	1.07841	3.61933	5.74451	1.98977	5.71251	3.66806	8.31892	6.88997	11.4546	7.98598	15.429	8.82534	11.066	1.86109	1.12071	1.04572	3.67478	3.19301	2.60667
BnaA01g16860D	37.3162	41.4068	31.9094	34.1046	30.3632	56.44	39.2831	35.8849	30.455	33.1518	25.1545	56.7422	48.4112	51.8479	36.3458	44.3506	54.4176	73.2391	54.7418	56.0816	38.7623	41.302	36.8515	29.0944	36.0309	36.3809
BnaA01g16870D	1.05625	0.914928	0.749487	0.576938	0.188587	0.295083	0.516564	0.636418	0.461825	0.423759	0.306651	0.149377	0.137987	0.122381	0.325308	0.848046	0.471601	0.489051	1.17895	1.52476	0.504969	0.502263	0.454336	1.41059	1.90233	1.51484
BnaA01g16880D	0	0	0	0	0	0	0	0	0	0	0	0	0	0	0	0	0	0	0	0	0	0	0	0	0	0
BnaA01g16890D	0	0	0	0	0	0	0	0	0	0	0	0	0	0	0	0	0	0	0	0	0	0	0	0	0	0
BnaA01g16900D	0	0	0	0	0	0	0	0	0	0	0	0	0	0	0	0	0	0	0	0	0	0	0	0	0	0
BnaA01g16910D	0	0	0.12773	8.02727	7.48405	1.59345	5.22361	2.09917	0.097659	0.844299	0.26617	1.5149	1.44884	1.06066	0.09536	0.132094	0	0.099283	0.048545	0.195189	0	0	0.132239	0	0	0
BnaA01g16920D	0	0	0	0	0	0	0	0	0	0	0	0	0	0	0	0	0	0	0	0	0	0	0	0	0	0
BnaA01g16930D	0	0	0	0	0	0	0	0	0	0	0	0	0	0	0	0	0	0	0	0	0	0	0	0	0	0
BnaA01g16940D	0	0	0	0	0	0	0	0	0	0	0	0	0.062099	0	0	0	0	0	0	0	0	0	0	0	0	0
BnaA01g16950D	0.239394	0.139381	0	0	0	0	0	0	0	0	0	0	0.126297	0	0	0	0.373252	0.28031	0.503462	0	0	0	0	0.312284	0.086564	0.175505
BnaA01g16960D	0.531374	0.59364	0.476808	0.303399	0.450485	0.570874	0.64178	0.37559	0.579246	0.618765	0.410104	0.611609	0.451095	0.553387	0.244508	0.220531	0.173291	0.303013	0.598466	0.484701	0.099526	0.343779	0.321512	0.520321	1.02692	0.294518
BnaA01g16970D	0	0	0	0	0.138363	0.343724	0.179339	0.119777	0	0	0.471552	0	0.063536	0	0.175981	0	0.062102	0.106208	0.060874	0.087358	0.181367	0.098847	0	0.487323	0.308556	0.410171
BnaA01g16980D	0	0	0	0	0	0	0	0	0	0	0	0	0	0	0	0	0	0	0	0	0	0	0	0	0	0
BnaA01g16990D	2.00939	2.33456	2.28566	1.54357	0.943091	0.901284	1.09385	1.58327	1.07309	1.4275	1.02679	0.222934	0.158179	0.117223	0.808415	0.494719	1.03775	0.475867	0.768492	0.710726	0.660091	0.790024	0.48603	1.98314	1.65063	1.24511
BnaA01g17000D	0.072642	0.138946	0.095873	0.144644	0.046162	0.168188	0	0.049585	0.287522	0.092759	0	0	0	0.38118	0.095223	0.148228	0.486556	0.123788	0.192766	0.100242	0.073186	0.049783	0.049546	0.293003	0.148017	0.075615
BnaA01g17010D	1.76073	2.16344	1.85792	10.2466	10.3881	13.7235	7.26755	12.705	0.250461	0.960725	0.185729	2.14667	0.837351	6.1174	7.93319	4.19335	8.36327	22.3645	21.9756	26.2888	9.34145	12.9053	14.7124	6.85903	9.06394	8.59594
BnaA01g17020D	0.550184	0.432681	0.878748	0.316773	0.624069	0.906147	0.626284	0.969986	0.012677	0.110885	0.340675	0.444627	0.739701	0.453834	0.085206	0.280567	0.4705	0.161983	0.966566	0.378715	0.4541	0.60738	0.377675	0.878831	0.469376	1.09865
BnaA01g17030D	0.114872	0.512796	0	0.777137	0.844591	0	0.590261	0.400424	0.582416	1.2248	0.697604	0.342589	0.163092	0.333427	0.273478	0.082685	0.161094	1.19814	0.245135	0.971553	0.2438	0.548273	0.562895	0.392515	0.738214	1.17049
BnaA01g17040D	7.45829	8.99476	6.809	17.6716	14.4161	3.03383	2.72552	2.63694	11.3162	9.14049	5.23029	5.01968	1.07173	5.2145	5.87847	3.42516	11.334	23.1738	15.6274	16.8399	1.22468	3.77967	1.37551	4.77542	16.9736	6.75637
BnaA01g17050D	2.28723	2.32224	2.43449	14.2621	13.7365	10.5113	11.9329	8.82606	9.60996	19.5877	8.35315	7.51147	6.29058	8.49868	1.45397	1.05295	2.50465	7.2945	7.10309	9.09033	5.83212	6.1533	5.48972	5.83228	6.10334	6.17495
BnaA01g17060D	2.64666	2.92343	1.6954	0.619706	0.914009	1.20779	1.05563	1.78688	3.20008	2.19374	2.2338	2.33818	3.08796	2.07475	0.849527	1.16446	1.04394	2.47664	2.39661	2.80685	1.36383	1.70817	0.87098	3.519	2.1936	2.59148
BnaA01g17070D	0.481518	0.194051	0.414459	0.678631	0.276309	0.246734	0.495866	0.280517	0.69286	1.69128	0.762861	0.307968	0.329908	0.47341	0.662419	0.346883	0.997822	1.11112	1.42604	0.271146	0.751604	0.507232	0.430177	1.34017	1.1536	2.10783
BnaA01g17080D	0	0	0	0	0	0	0	0	0	0	0	0	0	0	0	0	0	0	0	0	0	0	0	0	0	0
BnaA01g17090D	0	0	0	0	0	0	0	0	0	0	0	0	0	0	0	0	0	0.045466	0	0	0	0	0	0	0	0
BnaA01g17100D	1.39559	0.739706	0.502305	0	0	0.194521	0.205653	0.307645	0.775829	0.793232	0.842389	0.063903	0.150238	0.189117	0.312205	0.192886	0.639446	0.319291	0.562627	0.393078	0.046555	0.195213	0.064761	0.459109	0.386945	0.307513
BnaA01g17110D	0	0	0	0	0	0	0	0	0	0	0	0	0	0	0	0	0	0	0	0	0	0	0	0	0	0
BnaA01g17120D	0.080596	0.052814	0.287746	0.131249	0.15398	0.099126	0.099523	0.265979	0.15942	0.212596	0.026974	0.248803	0.167272	0	0	0.144597	0.267953	0.10335	0.053244	0.430165	0.395246	0.089013	0.952605	0.107276	0	0.08296
BnaA01g17130D	3.38447	3.61611	4.32249	2.12235	2.21328	1.86888	1.44518	2.71568	3.36118	4.01167	2.78069	2.41714	2.14709	3.11847	3.02913	3.46966	2.39148	3.38829	5.35793	4.23453	3.13317	2.47858	1.67079	4.41249	4.20258	4.42191
BnaA01g17140D	0	0	0	0.003435	0	0	0	0	0.075331	0	0	0	0.008677	0.040299	0	0	0	0.017593	0.008454	0.042863	0	0	0	0	0	0
BnaA01g17150D	1.22026	0.569399	0.873797	5.18958	6.33593	14.2345	14.7467	7.06124	1.4852	2.33537	1.32338	20.2155	13.9171	12.7234	5.43873	2.54656	5.46005	8.47089	2.97852	12.6566	4.40093	4.79084	10.2545	1.56175	2.03427	3.01136
BnaA01g17160D	0	0	0	0	0	0	0	0	0	0	0	0	0	0	0	0	0	0	0	0	0	0	0	0	0	0
BnaA01g17170D	0.847556	0.736127	0.441919	21.5729	20.4309	16.8698	25.9262	26.2009	4.00004	2.26536	2.57604	59.1114	56.4263	39.2626	45.2455	47.1919	40.4006	117.426	41.6936	84.1028	33.6005	21.6858	46.9076	1.9621	2.8078	2.62853
BnaA01g17180D	0	0	0	0	0	0	0	0	0	0	0	0.0853	0	0	0	0	0	0	0	0	0	0	0	0	0	0
BnaA01g17190D	0	0	0	0	0	0	0	0	0	0	0	0	0	0	0	0	0	0	0	0	0	0	0	0	0	0
BnaA01g17200D	0	0	0	0.074212	0.013137	4.94191	4.71085	0	3.66798	0.078016	3.77863	4.4427	1.47635	2.89831	0.152365	0	0	0	0	4.53204	0	0	4.26422	4.00534	4.36006	0
BnaA01g17210D	2.3666	2.78861	1.53026	1.25436	0.172974	2.8488	2.38932	2.15155	1.30853	2.70622	1.03884	3.18703	4.20238	8.19269	1.52607	1.93042	2.16589	5.8242	3.28524	2.79913	1.65621	2.76652	2.20678	3.47412	1.56596	2.08305
BnaA01g17220D	0	0	0	0	0	0	0	0	0	0	0	0	0	0	0	0	0	0	0	0	0	0	0	0	0	0
BnaA01g17230D	0.295942	0	0	0	0	0	0	0	0	0	0	0.106087	0	0	0	0	0	0	0.106101	0	0	0	0	0	0	0
BnaA01g17240D	0	0	0	0	0	0	0	0	0	0	0	0	0	0	0	0	0	0	0	0	0	0	0	0	0	0
BnaA01g17250D	2.70764	3.63958	5.76585	11.0928	11.8825	14.8608	8.00668	11.6649	8.01293	5.16277	1.89279	2.89778	1.85765	2.33965	12.5696	41.3722	31.9341	63.8715	78.8321	68.779	6.0852	4.0237	10.4662	12.6827	31.4153	25.8464
BnaA01g17260D	0.329316	0.325739	0.245727	0.820456	0.684163	0	0.170246	0.366297	1.90086	1.81238	1.1857	1.25836	1.65125	0.621445	0.244878	1.6666	1.59784	1.43775	1.04755	0.934066	0.415731	0.344061	0.91063	0.113962	0.421527	0.42703
BnaA01g17270D	0	0	0	0	0	0.294644	0	0.167449	0	0	0	0	0	0	0	0.36758	0	0.405082	0	0.419635	0	0	0	0	0	0
BnaA01g17280D	0.537757	0.571545	0.467163	1.02866	0.449221	0.132113	0.244903	0.076108	1.6132	1.59157	1.10171	1.00218	0.940449	0.759717	0.50952	2.28966	0.831445	1.89067	1.41515	1.23216	0.356904	0.258565	1.101	0.344121	0.248265	0.25392
BnaA01g17290D	0	0	0	0.862963	0	0.264317	0.664224	0.667604	0.098803	0	0.137652	0.323654	0.451908	0	0.118951	0.259327	0	0	0.194888	0	0.130047	0	0	0	0	0
BnaA01g17300D	0	0	0	0.535473	0	0.129538	0	0	0	0	0.730149	2.11742	0.16415	0	0	0	0.507309	0	0	0	0	0	0	0	0	0
BnaA01g17310D	0	0	0	0	0	0	0	0	0	0	0	0	0	0	0	0	0	0	0	0	0	0	0	0	0	0
BnaA01g17320D	0	0	0	0	0	0.479656	0	0	0	0	0	0	0	0	0	0	0	0	0	0	0	0	0	0	0	0
BnaA01g17330D	0.2645	0.286335	0.202814	0	0.079153	0.056794	0.028172	0.075076	0.181605	0.085183	0.061986	1.44143	1.04467	0.615279	0.086031	0.223115	0.032744	0.255773	0.246007	0.267002	0.141288	0	0.061489	0.277643	0.020411	0.252335
BnaA01g17340D	0.025709	0.035506	0.035279	0	0.026467	0.035871	0.071475	0.045085	0.07169	0.094106	0	0.203728	0.168557	0.136844	0.118736	0.093569	0.191049	0.180853	0.102748	0.036887	0.098844	0.132233	0.127379	0.07224	0.388721	0.11105
BnaA01g17350D	3.4561	4.7797	4.67684	1.90853	2.31433	3.57847	1.45423	2.76122	5.1935	1.75777	1.85701	3.81806	4.24419	3.21222	3.16592	3.83865	3.29651	5.84425	5.97322	5.27461	2.38715	3.00077	1.77189	3.96383	3.30984	3.89511
BnaA01g17360D	1.31396	2.57074	1.15072	0.158885	0.174988	0	0	0	0.159935	0.085876	0.174479	1.87694	0.882226	0.703211	1.65656	1.28704	0.677389	0.605119	1.67132	0.349304	0.922093	0.94751	0.604916	1.38732	2.50436	1.57841
BnaA01g17370D	0	0	0	0	0	0	0	0	0	0	0	0	0	0	0	0	0	0	0	0	0	0	0	0	0	0
BnaA01g17380D	0	0	0	0	0	0	0	0	0	0	0	0	0	0	0	0	0	0	0	0	0	0	0	0	0	0
BnaA01g17390D	0	0	0	0	0	0	0	0	0	0	0	0	0	0	0	0	0	0	0	0	0	0	0	0	0	0
BnaA01g17400D	1.1513	0.852501	0.070292	5.76449	6.37201	11.4153	12.4804	5.31781	0.123534	0.626024	0.248814	2.53565	3.12751	3.03648	1.40392	1.0631	1.57406	3.22207	4.04478	2.89005	0.822155	2.99099	1.63771	2.91915	4.69848	4.13765
BnaA01g17410D	3.07256	2.21396	1.86282	2.88405	2.81775	5.65941	7.12257	6.43014	3.76295	3.39569	4.31137	9.41623	10.5567	8.52388	2.38739	1.41722	1.79866	4.12394	4.60793	4.47212	4.26117	5.24889	4.59265	3.73231	3.71131	3.66342
BnaA01g17420D	5.63551	5.97592	4.76444	6.72612	7.58018	12.3001	13.5157	13.8006	5.52205	5.51172	7.79311	6.67557	7.54883	6.38243	5.99002	5.69854	4.97158	8.91442	9.11545	8.5976	9.51649	13.1626	10.774	10.1785	10.9344	12.2259
BnaA01g17430D	0	0	0	0	0	0	0	0	0	0	0	0	0	0	0	0	0	0	0	0	0	0	0	0	0	0
BnaA01g17440D	2.01834	1.75562	1.60478	0.408438	0.371923	0.45529	1.20146	0.414388	0.807613	0.867332	0.724131	0.703569	0.595394	1.54165	1.75656	1.04766	1.24483	1.4589	2.24636	3.97931	0.812139	0.970325	0.331806	1.65683	2.51195	2.57508
BnaA01g17450D	7.43633	9.25231	5.64672	2.303	1.93095	4.92531	4.75632	5.14273	4.36054	5.80923	3.96919	2.91793	2.94493	3.66745	4.49186	3.02164	2.72302	4.12979	3.38119	3.2745	3.4477	3.05003	2.12195	6.06691	5.10436	4.92835
BnaA01g17460D	9.31886	10.2099	7.26885	5.49741	5.24314	9.65488	8.89606	6.65317	3.19088	5.65487	5.55472	20.1194	17.0673	21.1806	20.8394	16.0049	23.855	19.5465	19.4721	15.3545	7.15585	7.02739	6.0477	15.1558	16.7941	11.0325
BnaA01g17470D	0	0	0	0	0	0	0	0	0	0	0	0	0	0	0	0	0	0	0	0.055887	0	0	0	0	0	0
BnaA01g17480D	1.63028	1.61195	1.19789	0.94537	0.801142	3.25451	2.5797	1.6635	0.904323	0.56518	0.378867	0.645108	0.758236	1.21306	1.63882	1.53468	1.45569	1.6423	1.65635	1.74312	1.92783	2.14908	1.69525	1.8441	1.80901	1.72181
BnaA01g17490D	2.75047	2.80843	2.24972	0.938478	1.2464	1.68545	1.23031	1.99868	2.02482	2.15335	1.87993	0.821903	0.789824	1.14531	1.62861	1.70335	1.69518	2.3507	2.91582	1.99512	1.17073	1.25259	0.746632	3.76598	2.76977	2.83759
BnaA01g17500D	3.83334	2.1112	2.76823	3.61606	5.80389	26.0938	20.3087	21.9051	2.82079	1.6987	2.34606	8.28776	6.05406	11.5034	6.62652	6.12689	5.62134	8.22003	10.7822	10.3585	15.6844	10.3811	20.1125	4.49902	6.57904	6.66101
BnaA01g17510D	0	0.131191	1.21895	0	0	1.54623	0	0.735827	0.002706	0.117286	0	0.091208	0	0	0.674489	0	0	0	0.001714	0.001259	0.000224	0.009362	0.002704	0.032645	0.002285	0.000901
BnaA01g17520D	0	0	0	0	0	0	0	0	0	0	0	0	0	0	0	0	0	0.0444	0	0	0	0	0	0	0	0
BnaA01g17530D	0.114666	0	0.145564	0.281243	0.304983	0.19705	0.364535	0.185759	0.168091	0.287666	0.080474	0.098226	0.118549	0	0	0	0	0.101176	0.245474	0.172191	0	0	0	0.854562	0.370661	0.523144
BnaA01g17540D	0	0	0	0	0	0.144733	0	0.300098	0	0	0	0	0	0	0	0	0	0	0	0	0.053165	0	0	0	0	0
BnaA01g17550D	8.28566	9.35977	10.416	8.84559	12.104	14.4386	16.0622	7.55469	12.5039	10.1934	9.47501	6.61167	4.36403	6.04266	9.45361	5.59776	9.76041	8.00203	11.6473	9.03548	11.548	13.6748	11.3721	18.157	14.5702	18.2554
BnaA01g17560D	3.42771	2.10954	3.70374	9.01131	10.9704	13.1461	11.6388	12.3772	9.33534	8.3287	11.1863	12.3686	13.2922	11.9997	9.38172	12.852	7.04954	4.51544	2.38552	4.38544	11.509	7.6485	13.0704	1.84536	1.92363	2.30065
BnaA01g17570D	97.9543	76.8313	120.293	469.457	431.504	760.734	826.606	863.16	120.313	117.972	113.688	281.302	186.895	287.191	342.217	327.547	272.459	208.753	174.384	263.394	590.513	631.393	837.924	138.786	169.223	167.483
BnaA01g17580D	1.41055	1.29185	1.61251	2.7274	2.18511	8.52504	9.54476	9.04944	1.25036	1.61023	1.67213	4.77635	4.61833	3.96063	3.23804	3.75538	2.48121	1.22446	2.23986	2.08	4.3323	4.26879	4.74684	2.15145	2.75884	2.95186
BnaA01g17590D	0.473267	0.355885	0.403227	0.28556	0.41521	1.2994	1.52944	1.48742	0.320815	0.88827	0.649781	1.29351	1.36416	1.21908	0.757305	0.409323	0.213563	0.421075	0.809091	0.488463	0.554988	0.371453	0.448851	0.525308	0.755946	0.611315
BnaA01g17600D	0.073643	0.036745	0	0.072239	0.114645	0.194442	0.363705	0.358595	0.073448	0.074892	0.03804	0.393282	0.343074	0.279341	0.244849	0.07228	0.098005	0	0.080446	0	0.06122	0	0.037735	0.149521	0	0
BnaA01g17610D	0	0	0.057475	0.119976	0	0.212183	0.236546	0	0.068129	0.070177	0	0	0.068823	0.072803	3.8173	4.20022	0.989627	0.070676	0	0	0.069178	0	0	0	0	0.071392
BnaA01g17620D	0	0	0	0	0	6.5076	1.77876	3.44755	0	0	0	0.452275	0.079699	0.492763	0	0	0	0.077522	0	0.666998	0	0	0	0.158316	0.146554	0.231758
BnaA01g17630D	0	0	0	0	0	0	0	0	0	0	0	0	0	0	0	0	0	0	0	0	0	0	0	0	0	0
BnaA01g17640D	0	0	0	0	0	0	0	0	0	0	0	0	0	0	0	0	0	0	0	0	0	0	0	0	0	0
BnaA01g17650D	0.025319	0	0	0	0.026683	0	0	0	0	0	0	0	0	0.050105	0	0	0	0	0	0	0	0	0	0	0	0
BnaA01g17660D	0	0.260475	0	0.091982	0.095723	1.68453	1.75712	0.704592	0.251815	0.529949	0.190254	2.20477	2.30745	2.84037	0.542257	0.418834	0	0	0	0.095619	0.831527	0	0	0.212232	0	0.192769
BnaA01g17670D	0	0	0	0	0	0	0	0	0	0	0	0	0	0	0	0	0	0	0	0	0	0	0	0	0	0
BnaA01g17680D	0.186915	0.108115	0.140801	0	0	0	0	0	0	0	0	0	0	0	0	0	0.069708	0	0	0	0	0	0	0.134307	0.035472	0.249012
BnaA01g17690D	12.2395	13.5934	10.5459	7.72712	9.85485	16.6617	17.6797	19.6752	13.2948	17.7625	15.6211	36.0265	37.0635	31.1871	11.1612	11.3649	10.9913	24.41	22.9846	24.7776	14.9413	17.1347	18.8548	16.2533	12.1991	13.5004
BnaA01g17700D	0.948962	1.26682	1.62371	0.242565	0.387814	0.178029	0.535157	1.52473	0.13735	0.806601	0.074023	5.19968	11.554	3.3087	5.37353	7.23341	4.64172	2.81403	2.73232	1.76193	0.436991	1.00856	0.26737	5.70849	3.61135	2.47836
BnaA01g17710D	0.092886	0.179865	0	0.077557	0	0.080512	0	0	0	0.093044	0	0	0	0	0.086185	0.0907	0.282329	0.187411	0	0	0	0	0	0.157587	0.373177	0.092105
BnaA01g17720D	5.52111	5.6096	5.87346	5.7126	5.31165	12.4259	11.4547	13.6746	4.05671	5.04903	4.34719	2.6009	2.48372	2.47303	7.58735	6.79476	5.49417	6.03207	6.84598	6.48328	6.75623	7.60478	7.97086	7.05985	7.45521	8.09963
BnaA01g17730D	0	0	0	0	0	0	0	0	0	0	0	0	0	0	0	0	0	0	0	0	0	0	0	0	0	0
BnaA01g17740D	2.0701	2.64929	1.79338	1.57143	1.61684	2.07852	2.32491	1.97556	2.05853	3.18292	3.67834	8.34725	10.6256	4.94098	3.31891	3.89031	2.43864	3.02254	2.2686	2.25157	1.14414	0.887419	1.10662	2.90987	2.01075	1.8229
BnaA01g17750D	0	0	0	0	0	0	0	0	0	0	0	0	0	0	0	0	0	0	0	0	0	0	0	0	0	0
BnaA01g17760D	8.40466	7.86216	9.08657	5.59028	6.52418	2.59592	2.43851	2.4555	4.26819	5.72654	3.94336	1.98502	2.33449	2.83602	7.71333	7.74756	9.51772	4.66659	3.7018	5.49811	6.36744	4.09818	4.02217	6.25793	5.49537	5.85937
BnaA01g17770D	0.071864	0.03879	0	0.018756	0.037221	0.246715	0.04186	0.386026	0.034208	0	0.032299	0.091795	0	0.03731	0.095808	0.04187	0.069329	0	0.091172	0	0.022595	0	0.034798	0.102952	0.033978	0.023656
BnaA01g17780D	0.357466	0.874225	0.652583	0.213366	0.760629	0.241665	0.733248	0.673679	1.38733	0.601874	0.36675	0.778452	1.04964	1.77574	1.03504	0.742018	1.55017	1.32497	1.40221	1.30326	0.597552	1.20179	1.04181	2.40661	1.22384	1.36704
BnaA01g17790D	0.107036	0.058873	0.227981	0	0	0.438961	0	0.170253	0.020339	0	0	0.139639	0	0.125124	0.21961	0.122003	0.060074	0.180936	0.123544	0.164307	0	0.042248	0.10207	0.134468	0.151322	0.260438
BnaA01g17800D	0	0	0	1.01076	0.956175	0	0	0	0.598919	1.62815	10.4507	1.06586	0.369079	0.160645	0.053487	0	0.181999	0.161516	0.135962	0.055932	0.050265	0.528574	0.705282	0	0	0
BnaA01g17810D	0	0	0	0	0	0	0	0	0	0	0	0	0	0	0	0	0	0	0	0	0	0	0	0	0	0
BnaA01g17820D	0.022463	0.010943	0.027725	0	0	0	0	0	0.007064	0	0.024397	0	0.008949	0	0	0	0	0	0	0.002275	0.008859	0	0	0	0	0
BnaA01g17830D	1.20778	0.722347	0.829639	0.502504	0.668226	0.572524	0.665786	0.883751	0.381194	0.247224	0.390876	0.417956	0.456177	0.248314	0.161604	0.060049	0.428728	0.390064	0.387018	0.410182	0.427408	0.898564	0.530657	0.099202	0.060994	0.272368
BnaA01g17840D	0	0	0	0	0	0	0	0	0	0	0.117383	0	0	0	0	0	0	0	0.046423	0.088198	0	0.058402	0.066427	0	0	0.059269
BnaA01g17850D	0	0	0	0	0	0	0	0	0	0	0	0	0	0	0	0	0	0	0	0	0	0	0	0	0	0
BnaA01g17860D	2.87349	2.64859	3.23974	4.29757	3.93849	7.84194	11.7873	9.24304	7.60462	8.79307	10.5579	8.11808	7.63995	7.74923	4.93326	6.19424	4.34373	2.94376	4.94633	5.1474	6.83926	5.9841	5.32352	5.3503	5.07201	5.5929
BnaA01g17870D	0	0.054749	0.037603	0.244828	0.111306	0.401502	0.203459	0.748503	0.036041	0	0.038788	0.411891	0.039954	0.04001	0.254067	0.100147	0.368132	0	0.114331	0.133453	0.331458	0.06886	0.376605	0.095992	0.388579	0.302563
BnaA01g17880D	0.687677	1.72986	0.683382	0.864322	0.749107	2.04204	2.30632	2.13464	0.684858	1.13527	0.758578	2.65081	1.13595	1.90328	1.05965	1.14883	0.804507	1.26723	1.33296	1.34024	1.85302	1.08214	1.75536	0.958564	0.64586	1.3663
BnaA01g17890D	4.8038	4.73902	6.04515	7.35433	5.32933	14.4454	12.5347	13.6992	4.52578	5.10356	5.69227	9.65758	9.51639	9.87369	4.15458	5.63116	4.96698	7.52834	7.46869	7.92868	8.86467	8.99525	9.61299	6.40751	7.32712	8.91231
BnaA01g17900D	0.357895	0.290531	0.082202	0.519231	0.445349	0.574206	1.001	0.279152	0.731467	0.63047	0.46931	0.350117	0.686184	0.670734	0.088851	0.107723	0.112409	0.128374	0.415712	0.257399	0.476274	0.111951	0.474505	0.240639	0.219582	0.239002
BnaA01g17910D	0.53197	0.346696	0.255831	0.111359	0.188673	0.076382	0.247402	0.229177	0.112742	0.151112	0.115615	0.113421	0.274577	0.039356	0	0.037997	0.229199	0.038206	0.293222	0.072577	0.036141	0.038412	0	1.10629	0.189842	0.58487
BnaA01g17920D	0	0	0	0	0	0	0	0	0	0	0	0	0	0	0	0	0	0	0	0	0	0	0	0	0	0
BnaA01g17930D	16.6473	22.5135	15.9237	21.0505	22.8751	48.898	48.0285	54.0948	29.4053	24.1748	21.7641	55.5243	51.4627	64.4696	32.5417	32.387	26.818	74.9672	63.2732	76.5778	56.7589	55.4655	60.7868	28.2926	28.5714	29.8869
BnaA01g17940D	37.0863	45.1038	22.1095	8.01475	7.28877	0.156458	0.919769	0.722902	318.734	329.215	248.26	17.9479	20.0691	13.5911	6.0211	2.18091	5.36373	40.7541	35.8348	41.7966	6.93635	18.3009	5.84007	38.9237	43.5158	35.1998
BnaA01g17950D	1.71425	1.5219	1.01249	2.8797	3.6341	3.70519	4.75323	4.03567	1.20791	0.84906	1.96956	5.08712	5.78728	6.67668	2.37262	2.14909	2.14094	2.1498	2.47778	4.1902	3.44647	3.71402	4.94897	2.17285	3.90362	3.26755
BnaA01g17960D	0	0	0	0	0	0	0	0	0	0	0	0	0	0	0	0	0	0	0	0	0	0	0	0	0	0
BnaA01g17970D	0.040601	0.056208	0	0	0	0	0.395675	0	0.051602	0.05774	0	0.085073	0	0.053943	0.051728	0.106764	0	0	0.102411	0.064836	0	0	0	0	0.196291	0
BnaA01g17980D	8.68981	9.74538	8.92066	6.72895	5.1506	3.5767	5.22751	5.0363	10.7149	8.04269	8.3555	4.13809	3.75946	6.67943	8.49007	8.31847	7.97432	13.6355	14.0383	15.0419	7.82419	11.1823	7.92089	8.69575	8.84623	10.9537
BnaA01g17990D	1.41664	1.23461	8.95693	4.80977	6.99695	2.42945	9.72811	3.67101	7.7001	2.09411	1.26435	8.54641	2.75442	10.6115	10.7839	11.1102	7.43125	9.55159	9.29514	3.18514	8.37531	3.79964	4.58494	14.3163	7.68654	9.47334
BnaA01g18000D	0.070058	0.068863	0	2.8028	2.62458	22.9447	25.8705	60.2638	0	3.24603	0	4.69259	1.06313	3.32054	1.78762	1.67038	2.74646	24.2803	65.8432	24.4815	8.1126	8.93864	8.11935	101.039	58.0541	81.7091
BnaA01g18010D	3.31476	2.95374	2.80918	2.38728	2.94406	7.5333	5.05486	7.2113	3.06755	3.33841	3.52005	4.30005	5.35883	3.97594	2.98394	3.45956	3.75855	4.20677	5.47167	4.61289	4.11856	4.37919	4.91639	6.48709	5.78697	5.96682
BnaA01g18020D	0	0	0	0.026697	0	0	0.079627	0	0	0	0	0	0	0	0	0	0	0	0	0	0	0	0	0	0	0
BnaA01g18030D	2.55225	3.54194	3.29737	2.54181	1.90661	7.07119	6.38112	5.39646	3.26282	5.16016	5.46625	4.2385	7.18951	5.78102	2.74442	3.90499	3.68708	4.80286	6.78737	8.05949	4.26811	4.01274	4.207	4.98896	4.91787	4.22727
BnaA01g18040D	0	0.055922	0.161222	0.083783	0.058881	0	0	0.029274	0	0.069954	0.07136	0	0.03007	0.056813	0.15305	0.058341	0.243462	0	0.014357	0.053757	0.072013	0.173505	0	0.230936	0.028546	0.087668
BnaA01g18050D	39.3963	68.4231	34.7896	11.2858	7.50601	9.08999	11.6859	6.79981	10.564	13.6873	10.7343	1.04105	1.09576	0.623438	36.8311	23.8533	42.6905	4.72606	1.99943	2.43569	2.85723	3.01561	2.57489	21.6303	30.3142	23.5333
BnaA01g18060D	0.063791	0	0.016972	0.021338	0	0.043957	0.066811	0.174754	0.021555	0.021469	0	0.074824	0	0	0.126146	0.085194	0.134914	0	0.032288	0.043404	0.075771	0.021959	0	0.14469	0	0
BnaA01g18070D	1.15016	1.27951	0.884748	0.608905	0.669124	1.51645	1.46764	1.71025	1.90303	2.20859	1.91932	2.21577	1.64738	2.62106	1.38823	1.67062	1.11099	2.443	1.86828	1.9691	1.92435	1.58524	2.31242	1.76502	1.25663	1.43598
BnaA01g18080D	0.260658	0.31844	0.217031	0.109413	0.184631	0.026464	0.086774	0.146628	0.154938	0.066838	0.088416	0.756356	0.763973	0.960249	0.057759	0.252122	0.139277	0.404682	0.178467	0.29869	0.058992	0.100185	0	0.272927	0.085747	0.229247
BnaA01g18090D	0	0	0	0	0	0	0	0	0	0	0	0	0	0	0	0	0	0	0	0	0	0	0	0	0	0
BnaA01g18100D	0	0	0	0	0	0	0	0	0	0	0.029298	0	0	0.041076	0	0	0	0	0	0	0	0	0	0	0	0
BnaA01g18110D	0.041393	0	0	0	0	0	0	0	0	0	0	0	0	0	0	0	0	0	0.038284	0	0	0	0	0	0	0
BnaA01g18120D	0	0	0	0	0	0	0	0	0	0	0	0	0	0	0	0	0	0	0	0	0	0	0	0	0	0
BnaA01g18130D	0	0	0	0	0	0	0	0	0	0	0	0	0	0	0	0	0	0	0	0	0	0	0	0	0	0
BnaA01g18140D	0	0	0	0	0	0	0	0	0	0	0	0	0	0	0	0	0	0	0	0	0	0	0	0	0	0
BnaA01g18150D	0	0	0	0	0	0	0	0	0	0	0	0	0	0	0	0	0	0	0	0	0	0	0	0	0	0
BnaA01g18160D	20.5105	19.4159	22.8143	80.2493	116.814	185.006	178.799	124.807	26.1258	42.2876	32.7133	52.9167	53.7742	60.3917	27.9336	23.4487	29.5724	41.5784	31.5299	37.188	126.796	72.3747	124.335	20.5442	24.9592	25.4731
BnaA01g18170D	2.23229	2.80342	1.33051	9.10778	6.80683	3.56833	4.68988	3.25501	4.07127	5.75891	1.44575	4.21331	5.69894	9.73286	1.04262	2.53818	2.49231	27.3483	29.9484	33.5196	2.88575	3.48746	3.32904	7.64096	3.58905	5.24097
BnaA01g18180D	7.32643	7.72048	6.69345	4.12249	6.11311	9.73538	3.75084	5.33487	4.14393	3.20499	2.71635	0.133179	0.262513	0.72662	2.02633	3.9655	3.55495	1.34021	3.21414	1.55489	1.35018	1.80824	0.797919	3.82321	5.97246	5.36592
BnaA01g18190D	0	0	0	0	0	0	0	0	0	0	0	0	0	0	0	0	0	0	0	0	0	0	0	0	0	0
BnaA01g18200D	0	0	0	0	0	0	0	0	0	0	0	0	0	0	0	0	0	0	0	0	0	0	0	0	0	0
BnaA01g18210D	0.142556	0.111134	0.201353	0.302285	0.158998	0.535475	0.497425	0.234103	0.146046	0.144078	0.239709	0.176663	0.030505	0.03065	0.057413	0.24683	0.29587	0.085991	0.174973	0.060036	0.203573	0.087353	0.148865	0.176562	0.088748	0.12073
BnaA01g18220D	0	0	0	0	0	0	0	0	0	0	0	0	0	0	0	0	0	0	0	0	0	0	0	0	0	0
BnaA01g18230D	0	0	0	0	0	0	0	0	0	0	0	0	0	0	0	0	0	0	0	0	0	0	0	0	0	0
BnaA01g18240D	0	0	0	0	0	0	0	0	0	0	0	0	0	0	0	0	0	0	0	0	0	0	0	0	0	0
BnaA01g18250D	0	0	0	0	0	0	0	0	0	0	0	0	0	0	0	0	0	0	0	0	0	0	0	0	0	0
BnaA01g18260D	0	0	0	0	0	0	0.084313	0	0	0	0	0	0	0	0	0	0	0	0	0	0	0	0	0	0	0
BnaA01g18270D	0.031865	0	0	0.031406	0.032683	8.51417	2.92674	18.5476	0.031726	0.063944	0	10.0823	5.44194	8.06122	0.031117	0.064368	0.187436	0.177071	0.063363	0	0	0.129711	0.192994	1.53005	1.51147	0.917396
BnaA01g18280D	2.03477	1.97586	1.65983	0.727584	0.796763	1.26502	0.602699	0.884509	1.67816	2.05454	1.28629	2.72152	4.27677	3.46852	1.30473	1.30765	1.27586	1.75115	1.61584	2.05588	0.981877	1.77045	1.68121	1.83916	0.455272	1.31379
BnaA01g18290D	0	0	0	0	0	0	0	0	0	0	0	0	0	0	0	0	0	0	0	0	0	0	0	0	0	0
BnaA01g18300D	0	0	0	0	0	0	0	0	0	0	0	0	0	0	0	0	0	0	0	0	0	0	0	0	0	0
BnaA01g18310D	0	0	0	0	0	0	0	0	0	0	0	0	0	0	0	0	0	0	0	0	0	0	0	0	0	0
BnaA01g18320D	0	0.909472	0	1.0545	0	0	0	0	0	0	0	0	0	0	1.43549	0	0	0	0.580959	0	0	0	0	1.22652	5.17397	1.49342
BnaA01g18330D	0.021179	0.068413	0.014259	0.413233	0.027187	0	0.006966	0.013386	0.184531	2.51496	0.755572	0.046221	0	0	0.181337	0.015861	0.002179	0.257867	0.136446	0.009873	0	0.012871	0.00386	0.052164	0.374322	0.346465
BnaA01g18340D	0.016255	0.045826	0.037818	0.019583	0.011765	0.13671	0.149211	0.025388	0.06162	0.055247	0.08524	0.036279	0.040052	0.022619	0.061784	0.060235	0.026659	0.0579	0	0.026183	0.042554	0.013806	0.0252	0.015986	0.022877	0.027664
BnaA01g18350D	2.61783	2.6416	2.01696	6.57219	4.28615	6.59013	10.8784	4.63953	2.96617	4.56251	4.39147	8.44426	9.75123	7.30302	1.64847	2.40727	2.3598	2.52222	2.61584	4.31768	3.8105	3.3056	3.53468	2.68586	2.6858	2.88942
BnaA01g18360D	0	0	0	0	0	0	0	0	0	0	0	0	0	0	0	0	0	0	0	0	0	0	0	0	0	0
BnaA01g18370D	0	0	0	0	0	0	0	0	0	0	0	0	0	0	0	0	0	0	0	0	0	0	0	0	0	0
BnaA01g18380D	4.02957	3.40827	3.05795	1.90939	1.96854	5.28348	3.62177	8.00295	2.44848	3.31005	2.85671	2.07335	2.11519	2.73936	4.07085	5.03662	2.57473	4.40267	6.08413	5.44425	3.17006	4.09809	2.21273	4.2084	5.06875	5.77836
BnaA01g18390D	6.66125	9.05154	5.56634	0.748308	1.33631	0.985767	1.25663	2.30145	7.82882	9.30248	3.80743	18.8844	37.4013	30.2252	2.63789	3.82437	2.28792	8.35901	8.44539	7.86692	1.12665	2.00407	1.25081	3.76377	3.39407	4.70233
BnaA01g18400D	0	0	0	0	0	0	0	0	0	0	0	0	0	0	0	0	0	0	0	0	0	0	0	0	0	0
BnaA01g18410D	43.541	51.2557	40.6519	40.499	29.6677	39.9701	44.9895	46.7324	30.5579	29.0755	34.861	16.7794	14.4428	13.478	68.2454	52.1162	31.6909	49.532	31.694	44.5276	66.7834	61.8683	63.5294	57.0409	46.6582	58.0727
BnaA01g18420D	0.275065	0	0.62697	0.123787	0.122402	1.35661	0.254404	0.540642	0.230827	0.316165	0.285292	0.61333	0.387872	0.678352	0	0.346714	0	0.456454	0.598058	1.06934	0.939865	0.876456	0.133293	0	0	0.405034
BnaA01g18430D	6.35719	6.03475	5.38378	5.53817	4.99246	11.0584	10.78	10.171	7.29463	7.85327	6.94462	16.1382	16.7848	16.7093	4.96203	5.54538	5.42985	10.9222	11.4028	11.7775	8.59896	10.7142	10.9154	8.2094	8.78735	9.59489
BnaA01g18440D	0.161612	0.66301	0.287121	0.010708	0.101211	0.061458	0.044509	0.051744	0.258293	0.868945	0.265703	3.72948	3.13392	2.0189	0.160305	0.599922	0.248087	1.11173	1.01925	1.0389	0.195698	0	0.622091	0.448124	1.56201	0.789529
BnaA01g18450D	0.190258	0.447785	0.041399	0.180806	0.468775	35.4014	16.9997	5.54253	0.984827	0.431092	0.821335	0.543722	0.498163	1.10394	0.829565	0.194487	0.012629	0.394268	0.327421	1.40589	1.45331	0.753616	1.91428	0.20472	0.382371	0.082547
BnaA01g18460D	1.1546	2.36937	1.25171	0.34729	0.299504	1.6867	1.93406	2.60761	0.982225	1.27356	0.730731	0.939126	1.0341	1.65704	1.25255	0.895079	0.805143	2.12805	3.23368	3.3261	1.17326	2.4766	1.44518	3.19503	1.96116	3.04466
BnaA01g18470D	18.1544	21.8791	21.5584	8.58698	7.10515	4.07904	2.06293	4.43307	10.4425	17.6134	11.2721	2.93477	2.89615	2.61504	5.11175	11.0503	4.64747	7.24608	2.8448	2.87586	3.53601	1.54203	3.17227	10.7563	9.84301	4.04381
BnaA01g18480D	0	0	0	0	0	0	0	0.144364	0.029928	0	0.091379	0.239985	0.013127	0	0.004031	0	0.014627	0	0	0	0	0	0.155379	0	0.107582	0
BnaA01g18490D	0	0	0	0	0	0	0	0	0	0	0	0.094847	0	0	0	0	0	0	0	0	0	0	0	0	0	0
BnaA01g18500D	0	0	0	0	0	0	0	0	0.107116	0	0.030682	0.758074	0.285956	0.108315	0.366838	0.159597	0	0	0.106973	0.221962	0	0	0	0	0	0.106291
BnaA01g18510D	0	0	0	0	0	0	0	0	0.055998	0.080173	0	0	0.072819	0.299212	0	0.15951	0.465592	0.356927	0.081067	0.119245	0	0	0.029141	0	0	0
BnaA01g18520D	0	0	0	0	0	0	0	0	0	0	0	0	0	0	0	0	0	0	0	0	0	0	0	0	0	0
BnaA01g18530D	2.91818	3.10553	2.03691	2.00182	1.66447	2.24381	2.56998	1.91924	2.43156	2.5812	3.36391	14.1491	14.9023	15.8268	3.17055	2.12437	3.49724	3.69499	2.23349	2.36384	3.33784	3.53444	3.3263	1.72979	1.84718	1.19611
BnaA01g18540D	0.02034	0.029657	0.039731	0.111159	0.032992	0.026528	0.047676	0.004897	0.019982	0	0.041397	0.175092	0.367481	0.242345	0	0	0.021656	0.070451	0.061193	0.043272	0.020152	0.044259	0.06994	0	0	0.021914
BnaA01g18550D	2.78035	2.94996	2.66191	0.473037	0.3939	1.12391	0.844712	1.00512	1.88617	2.27153	2.28442	2.23731	3.43714	4.2027	1.35082	1.44558	2.12908	3.32382	3.83874	3.8594	1.86517	1.43691	1.52843	2.7635	1.79429	1.65626
BnaA01g18560D	0	0	0	0	0	0	0.05417	0	0	0	0	0	0	0	0	0	0	0	0	0	0	0	0	0	0	0
BnaA01g18570D	0.296498	0.555889	0.331527	0.191529	0.238438	0.039508	0.020016	0.070611	0.056829	0.226467	0.362115	0.407668	0.815938	0.949233	0.102231	0.111502	0.173208	0.303973	0.120336	0.415218	0.038815	0.011749	0.115358	0.25275	0.384665	0.156617
BnaA01g18580D	0.218561	0.879081	0.132766	0	0	0	0.031818	0	0.350987	1.79106	0.074816	0.009818	0.047963	0	0.010273	0	0	0	0.099909	0	0.027776	0	0.013185	0.170335	0.731127	0.175357
BnaA01g18590D	0.072465	0.109545	0.218989	0.064458	0.046909	0.599596	0.122903	0.459298	0.127898	0.127893	0.024331	0.344675	0.350363	0.247526	0.278668	0.110838	0.095149	0.318709	0.120645	0.556131	0.245096	0.391343	0	0.166644	0.147271	0.389219
BnaA01g18600D	0	0	0	0	0	0	0	0	0	0	0	0	0	0	0	0	0	0	0	0	0	0	0	0	0	0
BnaA01g18610D	0	0	0	0	0	0	0	0	0	0	0	0	0	0	0	0	0	0	0	0	0	0	0	0	0	0
BnaA01g18620D	0	0	0	0	0.236448	0	0	0	0	0	0.138232	0	0	0	0	0	0	0.137039	0	0.069358	0	0.050836	0	0	0	0
BnaA01g18630D	2.02418	1.77251	2.55518	1.44887	0.689485	2.38736	2.07071	2.99419	0.731146	0.965569	0.840207	3.70008	3.88447	3.16417	2.20652	1.88241	1.65508	2.70742	2.64246	2.26989	2.50246	2.23397	2.84132	2.65848	2.21111	2.19301
BnaA01g18640D	0	0	0.129929	0.035292	0.196337	1.40127	2.37946	1.54381	0.035711	0.072097	0	0	0.037345	0.037398	2.28177	2.89601	0.210739	0	0.035661	0	0.143095	0.072151	0.134508	0.107956	0.13789	0.148049
BnaA01g18650D	0.309809	0.22675	0.576065	0.312325	0.393709	0.079396	0.361619	0.394248	0.195057	0.08432	0.040059	0.039342	0	0	0.524138	0.9343	0.658693	0.238015	0.540927	0.278044	1.27949	0.667196	0.978081	0.346531	0.274893	0.080906
BnaA01g18660D	0	0	0	0	0	0	0	0	0	0	0	0	0	0.016406	0	0	0	0	0	0	0	0	0	0	0	0
BnaA01g18670D	0	0	0	0	0	0.226809	0	0	0	0.26913	0	0	0	0	0	0	0	0	0	0	0	0	0	0	0	0
BnaA01g18680D	11.2409	10.959	5.58572	3.87668	2.87803	0	0.753373	0.381787	35.5136	36.6508	27.2929	3.23459	3.90704	5.8983	2.82695	2.13926	4.25442	31.2818	22.5571	44.0121	1.92074	2.26458	0.192066	18.4379	17.0476	19.3838
BnaA01g18690D	1.33197	1.66762	1.39754	0.58353	0.785353	1.52683	1.01407	1.08515	1.90379	1.47515	1.50937	1.15172	1.526	1.3448	0.52056	0.897692	0.722476	1.20191	2.38831	1.94003	1.02791	1.44543	1.12915	2.10786	1.48442	2.33449
BnaA01g18700D	0	0	0	0.020611	0	0	0.015846	0	0	0	0.031456	0	0	0	0	0	0	0.0095	0	0	0.015364	0	0.022746	0	0	0
BnaA01g18710D	0	0	0	0	0	0	0	0	0	0	0	0	0	0	0	0	0	0	0	0	0	0	0	0	0	0
BnaA01g18720D	0	0.020923	0.077421	0	0	0	0.0135	0.022732	0.038282	0.026468	0	0	0.01371	0	0.025718	0	0	0.021274	0	0	0	0	0	0	0	0
BnaA01g18730D	1.89256	1.65703	1.51449	1.4674	1.72294	2.99554	3.42716	2.77923	1.64459	1.68837	1.68342	2.79758	2.68752	2.5624	1.60104	1.30854	1.36619	2.36225	2.05417	2.14581	2.37999	2.13783	2.54846	2.28845	1.93025	2.53796
BnaA01g18740D	0	0	0	0.016223	0.033765	0	0	0	0	0	0.016805	0	0	0	0	0.066499	0	0.033321	0	0	0	0	0	0	0	0.016999
BnaA01g18750D	0	0	0	0	0	0	0	0	0	0	0	0	0	0	0	0	0	0	0.641307	0	0	0	0	0	0	0
BnaA01g18760D	0.100887	0	0	0	0	0	0	0	0	0.165821	0.083143	0.198813	0.213808	0	0	0.097983	0.09152	0.090309	0.096805	0	0	0	0.316995	0	0.314957	0.190873
BnaA01g18770D	0.057433	0	0.033063	0.424728	0.133626	0.20898	0.359123	0.194455	0.563099	0.093409	0.206709	0.339737	0.243921	0.339796	0.199426	0.271459	0.018683	0.019525	0.082991	0.04469	0.273651	0.413373	0.578412	0	0.248627	0.064319
BnaA01g18780D	0	0.022385	0	0	0	0	0	0	0.044971	0.045625	0	0	0	0	0	0.022925	0	0.015316	0	0.09279	0	0.02104	0	0	0	0
BnaA01g18790D	0	0.004781	0	0	0	0	0	0	0	0	0	0	0	0	0	0	0	0	0	0	0	0	0	0	0	0
BnaA01g18800D	0	0.015397	0	0	0.047927	0.034454	0.015317	0.028423	0	0	0	0	0.029799	0	0	0	0	0	0	0.020137	0	0	0	0	0.017529	0
BnaA01g18810D	0	0	0	0	0	0	0	0	0	0	0	0	0	0	0	0	0	0	0	0	0	0	0	0	0	0
BnaA01g18820D	0	0	0	0	0	0	0	0	0	0	0	0	0	0	0	0	0	0	0	0	0	0	0	0	0	0
BnaA01g18830D	0	0	0	0	0	0	0	0	0	0	0	0	0	0	0	0	0	0	0	0	0	0	0	0	0	0
BnaA01g18840D	0	0	0	0	0	0	0	0	0	0	0	0	0	0	0	0	0	0	0	0	0	0	0	0	0	0
BnaA01g18850D	0	0	0	0	0	0	0	0	0	0	0	0	0	0	0	0	0	0	0	0	0	0	0	0	0	0
BnaA01g18860D	2.25845	2.03132	3.45595	2.20532	1.47778	3.85439	1.97361	3.5627	3.9107	2.71291	2.20454	5.26865	4.43958	3.69113	1.90258	1.63371	2.5038	2.13628	2.09508	4.00641	1.54644	2.88143	2.28646	2.45055	3.12475	4.11633
BnaA01g18870D	47.21	63.7249	47.4874	21.5667	21.1628	18.7884	14.4588	20.7633	26.7711	26.3735	20.4779	9.61582	9.36607	15.1817	29.138	26.8963	31.1733	41.4365	33.885	33.6521	17.3106	19.0369	16.4944	26.7631	32.9416	40.143
BnaA01g18880D	7.35186	14.8201	11.7742	12.5583	9.42962	15.4948	16.1346	21.3401	11.7931	7.95679	8.24057	9.11185	0	0.059316	10.7514	9.87995	12.5657	14.5632	8.67471	18.154	15.669	13.1687	13.0941	9.32118	7.49779	8.7888
BnaA01g18890D	53.6135	62.5285	50.0751	41.4308	34.3277	74.8258	75.3835	70.4285	36.4355	32.5491	26.4005	21.7628	23.4382	35.1215	61.5718	52.8674	60.782	67.419	47.5541	54.5261	56.9021	53.186	46.9223	54.3383	61.6193	54.7865
BnaA01g18900D	0.07726	0.382018	0	0.075272	0.128544	0	0	0	0	0.21543	0	0	0	0.075756	0	0	0	0.102961	0.184318	0.097423	0.235088	0.168501	0.162532	0.125248	0	0.155768
BnaA01g18910D	0	0.126402	0.144961	7.35267	6.7149	8.22938	4.26263	2.17211	0	0.276287	0	3.99908	3.06489	7.09633	1.28143	1.02049	1.51036	6.56228	6.99555	5.95591	4.0052	2.42456	5.412	2.84395	2.31898	6.45509
BnaA01g18920D	9.06012	9.35258	8.04038	8.44182	6.91957	21.6412	17.9627	23.2021	12.3905	10.7076	6.80667	9.91562	10.9031	15.6426	10.1768	10.5489	9.13361	12.2332	14.5258	13.1708	8.10715	13.6244	13.9504	14.4402	16.2327	15.5642
BnaA01g18930D	0.772763	0	0	0.014439	0.997762	0.098198	0	0	0.047964	0.017626	0	0	0	0.008789	0	0	0.006133	0	0.0555	0.020649	0.064908	0.023967	0	1.09077	1.44463	0.019794
BnaA01g18940D	0.905714	0.760406	0.978981	0.676767	0.718049	3.98877	3.35377	3.24555	1.18853	1.57041	1.24429	2.48094	4.36182	3.60646	1.2039	1.64112	0.91485	1.88989	1.56644	1.84164	1.32339	1.80427	1.75282	2.70063	2.87246	2.86745
BnaA01g18950D	0.239455	0.215504	0	0.094341	0.25226	0.404025	0.563413	0.626161	0.146381	0.140836	0.227989	0.589949	0.586799	0.65442	0.261437	0.383269	0.395988	0.466953	0.477377	0.434024	0.395345	0.679654	0.472697	0.338339	0.621459	0.473138
BnaA01g18960D	0.23275	0.142874	0.083564	0.084049	0.073218	0.106475	0.315321	0.13266	0.098771	0.052554	0.029023	0	0	0	0.102852	0.166664	0.072321	0.057544	0.041451	0.095105	0.145362	0.028928	0.233736	0.36277	0.278138	0.19187
BnaA01g18970D	0.424055	0.195554	0.50607	0.435185	0.394856	0.84169	0.712622	0.833786	0.469719	0.485329	0.362986	1.38711	0.712603	1.15601	0.433589	0.792016	0.728425	1.7145	1.31128	1.49715	0.467281	0.644934	0.786966	0.859914	0.785671	0.790791
BnaA01g18980D	0	0	0	0	0	0	0	0	0	0.046188	0	0	0	0	0	0	0	0	0	0	0	0	0	0	0	0
BnaA01g18990D	0.247674	0.370048	0.132488	0.100376	0.389422	0.790518	0.803075	0.608632	0.251833	0.230434	0.35319	0.85961	0.617598	0.290671	0.276359	0.698181	0.112611	0.191246	0.192141	0.279786	1.0608	1.89598	1.27636	0.035565	0.269223	0.416751
BnaA01g19000D	0	0	0	0	0	0	0	0	0	0	0	0	0	0	0	0	0	0.023539	0	0	0	0	0	0	0	0
BnaA01g19010D	2.03819	0.214259	0.174574	0.262486	0	0.170945	0.138162	0.35113	0.120452	0.65491	0.192052	0.433444	0.372697	5.30226	0.238424	0.201295	0.197507	0	0.224532	0.34848	0	0.368314	0.169874	0.383153	2.44506	0.15976
BnaA01g19020D	0	0	0	0	0	0	0	0	0	0	0	0	0	0.040819	0	0	0	0	0.026617	0	0.023526	0	0	0	0	0
BnaA01g19030D	0	0	0	0	0	0	0	0	0	0	0	0	0	0	0	0	0	0	0	0	0	0	0	0	0	0.034715
BnaA01g19040D	0.112583	0.055332	0.054795	0	0.115091	0.105369	0.144088	0.273918	0	0.154313	0.057283	0.213968	0.167651	0.107635	0	0.226667	0.11282	0.283375	0.465962	1.58175	0.111729	0.110004	0	0.224966	0	0
BnaA01g19050D	0	0	0	0	0	0	0	0	0	0	0	0	0	0	0	0	0	0	0	0	0	0	0	0	0	0
BnaA01g19060D	0	0	0	0	0	0	0	0	0	0	0	0	0	0	0	0	0	0	0	0	0	0	0	0	0	0
BnaA01g19070D	0	0	0	0	0	0	0	0	0	0	0	0	0	0	0	0	0	0	0	0	0	0	0	0	0	0
BnaA01g19080D	0	0	0	0	0	0	0	0	0	0	0	0	0	0	0	0	0	0	0	0	0	0	0	0	0.119509	0.226843
BnaA01g19090D	2.16297	1.47091	1.25923	0.763464	1.06008	0.425062	0.392367	0.840285	0.437625	1.43485	0.963934	0.512823	0.884485	0.875445	0.486244	0.161927	0.757087	1.18285	1.8708	1.39539	0.488897	0.646627	0.239419	2.30325	2.25367	2.29818
BnaA01g19100D	40.9083	41.3359	39.9861	43.5057	46.9348	63.8047	64.2198	59.7764	49.2051	32.1424	39.0335	94.1417	85.5978	94.7605	40.0994	44.1722	39.5267	58.6348	65.8273	72.06	52.5784	47.8698	54.944	35.4403	36.1513	41.8849
BnaA01g19110D	67.1763	58.3456	53.4052	86.6385	112.182	16.135	17.9241	8.98983	189.955	254.986	94.025	425.501	692.132	740.191	38.0713	22.1966	62.783	451.49	312.106	432.516	56.0349	46.1555	23.1751	98.438	105.713	142.317
BnaA01g19120D	6.65294	13.2883	7.3716	14.2536	23.557	4.91806	5.95902	7.68815	24.0534	55.1831	38.4751	7.89969	9.64734	5.9137	5.31522	8.24274	8.38378	6.59576	12.1461	8.10133	8.23984	7.92708	6.77952	7.67622	6.90059	7.17154
BnaA01g19130D	0.171035	0.249959	0.314026	0.156661	0.244203	0.075983	0.395279	0.110648	0.236523	0.050624	0.243431	0.286173	0.119079	0.154938	0.497874	0.158313	0.079684	0.524869	0.905995	0.479684	0.438611	0.302265	0.635498	0.055826	0.357267	0.737557
BnaA01g19140D	0	0.114016	0	0	0	0	0	0	0.029448	0.177168	0.237963	0.414224	0.408961	0.185032	0.222207	0.43695	0.180601	0.138829	0.139781	0.196168	0.047986	0	0	0	0.022274	0
BnaA01g19150D	3.4132	4.50891	1.58587	2.35784	3.15656	4.62553	3.96204	2.84913	4.64835	4.72339	5.36048	6.42755	5.14405	6.36123	3.06054	2.69854	3.27075	4.48387	3.78246	5.94141	4.2744	5.05906	2.4716	3.98903	2.15695	3.8178
BnaA01g19160D	3.61479	3.87895	4.01139	6.77141	6.07493	5.10027	8.94852	5.8484	5.81997	10.9721	4.44	2.02534	2.51292	2.27592	2.1293	1.75052	2.4145	3.58494	5.93581	4.36362	3.01557	2.77286	3.34819	7.32279	5.0593	5.67074
BnaA01g19170D	0	0	0	0	0	0	0	0	0	0	0	0	0	0	0	0	0	0	0	0	0	0	0	0	0	0
BnaA01g19180D	0.140849	0.168905	0.232377	0.152224	0.040298	0	0.069637	0.091507	1.77064	1.03101	1.18611	0.531977	0.525959	0.338968	0.050985	0.200563	0.298353	0.340342	0.301199	0.276015	0.252834	0.173809	0.309277	0.425308	0.441731	0.265432
BnaA01g19190D	0	0	0	0	0	0	0	0	0	0	0	0	0	0	0	0	0	0	0	0	0	0	0	0	0	0
BnaA01g19200D	0	0	0	0	0	0	0	0	0	0	0	0	0	0	0	0	0	0	0	0	0	0	0	0	0	0
BnaA01g19210D	4.44418	4.87947	2.87327	0.579711	0.887716	2.35851	2.77561	1.70522	8.86206	8.64403	9.1723	2.90156	3.11591	2.95882	3.68151	2.71351	2.44887	2.31815	1.41192	2.28827	4.08528	4.46629	3.16302	2.00396	1.12202	1.94385
BnaA01g19220D	0	0	0	0	0	0	0	0	0	0	0	0	0	0	0	0	0	0	0	0	0	0	0	0	0	0
BnaA01g19230D	1.19965	1.13986	1.3877	0.89394	0.661899	1.47106	1.49148	1.43413	0.621972	0.503278	0.510261	0.366492	0.237681	0.150178	0.870695	0.65363	0.903259	0.423097	0.906725	0.581825	0.562246	0.609816	0.424562	1.60223	1.74806	1.86981
BnaA01g19240D	0	0	0	0	0	0	0	0	0	0	0	0	0	0	0	0	0	0	0	0	0	0	0	0	0	0
BnaA01g19250D	0	0	0	0	0	0	0.052318	0	0	0	0	0	0	0	0	0	0	0	0	0	0	0	0	0	0	0
BnaA01g19260D	9.27616	10.1911	8.21829	3.71333	4.02155	8.46275	9.41948	8.92956	7.2215	7.66541	7.74765	4.82668	4.41626	4.80308	3.95247	4.33224	3.19986	7.17451	6.24906	6.19954	6.91993	5.05388	5.43479	8.14889	6.79381	7.68775
BnaA01g19270D	1.00244	0.88178	0.912757	4.07772	6.26102	6.45683	5.50941	6.68115	5.30231	4.06445	5.37456	3.69924	2.85441	3.03857	2.48924	2.91185	1.58564	1.79509	2.37	2.98461	1.54784	1.37324	1.76147	1.54964	1.93422	2.41347
BnaA01g19280D	38.9285	40.1309	45.7673	40.102	38.2226	7.76015	16.0819	14.691	28.8621	29.0423	27.035	19.4688	16.913	23.4998	34.8196	26.7071	33.3934	28.4369	29.2569	30.928	37.2832	38.5585	31.6496	45.4762	41.4852	42.0808
BnaA01g19290D	0	0	0	0.077351	0.159643	0.357991	0.283205	0.160168	0	0	0	0.069453	0.0776	0	0	0	0	0	0.078553	0	0.137638	0	0	0.152191	0	0.153674
BnaA01g19300D	5.3965	5.76492	3.93325	1.17931	2.75622	4.13917	3.71037	5.36113	7.29434	9.06092	5.03156	34.0342	42.5253	31.5448	2.1674	2.98668	2.26509	8.31804	7.42605	8.09666	2.63767	2.34883	2.48904	4.34335	4.22836	4.01058
BnaA01g19310D	0	0	0	0	0	0	0	0	0	0	0	0	0	0	0	0	0	0	0	0	0	0.127107	0	0	0	0
BnaA01g19320D	0.130282	0	0	0	0	0	0	0	0.092563	0	0	0	0	0.156331	0	0	0	0	0.063936	0	0	0	0	0.097945	0	0
BnaA01g19330D	1.71119	1.36298	0.772551	1.93066	1.58114	5.35114	3.72134	6.11667	2.26729	0.663521	3.59701	2.57491	3.10436	3.19023	1.41612	2.6305	1.35668	3.94575	4.23548	4.04589	2.43935	3.84661	3.23315	3.42782	3.69529	2.70515
BnaA01g19340D	0.153581	0.127869	0	0	0	0	0.053912	0.044998	0.091896	0	0	0	0	0.246933	0.026223	0	0.000466	0	0	0	0.254574	0.074452	0.074303	0.071977	0.166612	0.000215
BnaA01g19350D	0	0	0	0	0	0	0	0	0	0	0	0	0	0	0	0	0	0	0	0	0	0	0	0	0	0
BnaA01g19360D	0	0	0	0	0	0	0	0	0	0	0	0	0	0	0	0	0	0	0	0	0	0	0	0	0	0
BnaA01g19370D	0	0	0	0	0	0	0	0	0	0	0	0	0	0	0	0	0	0	0	0	0	0	0	0	0	0
BnaA01g19380D	0	0	0	0	0	0	0	0	0	0	0	0	0	0	0	0	0	0	0	0	0	0	0	0	0	0
BnaA01g19390D	2.30164	3.27987	2.69795	4.50778	5.64768	32.0584	33.4285	26.738	1.99226	1.68397	1.82756	1.80562	1.3421	2.71084	3.89265	3.01168	4.01278	5.18454	4.34174	5.55371	12.5036	7.41765	12.2502	6.31325	7.32862	7.10006
BnaA01g19400D	66.8603	73.477	76.5964	78.2844	69.2602	42.0564	49.1192	41.2171	66.0183	66.493	62.8543	22.8753	20.5672	27.0614	82.9638	63.2778	72.3967	52.8638	65.1372	62.0224	73.6285	66.9445	49.4372	71.6414	82.0143	76.9088
BnaA01g19410D	3.61087	3.98927	3.36718	7.35463	4.95282	7.84341	5.46725	7.99031	4.82914	3.24697	3.16013	3.2423	3.03622	5.19148	5.0106	3.16566	2.98368	7.46135	9.21509	9.14676	5.77917	8.68998	8.07632	5.30177	5.99015	7.05462
BnaA01g19420D	0	0	0	0	0	0	0	0	0	0	0	0	0	0	0	0	0	0	0	0	0	0	0	0	0	0
BnaA01g19430D	0	0	0	0.056458	0.024583	0	0	0	0	0	0	0	0	0	0	0	0	0	0	0	0	0	0	0	0	0
BnaA01g19440D	0	0	0	0	0	0	0	0	0	0	0	0	0	0	0	0	0	0	0	0	0	0	0	0	0	0
BnaA01g19450D	0	0.030888	0.019073	0	0.034117	0.092515	0	0	0.049532	0	0	0.035591	0	0	0	0	0.050877	0	0.02912	0.028825	0	0	0	0.000469	0.000687	0.033659
BnaA01g19460D	3.16306	2.12062	1.85884	0.957378	1.2037	0	0.424951	0	6.42659	3.89363	2.28066	3.12548	3.3054	1.71226	1.25198	1.31058	0.92556	2.45965	1.46513	4.31192	1.63201	3.699	3.33163	0.26116	0.428645	0.672105
BnaA01g19470D	0.038956	0.152615	0.109006	0	0.100727	0.046546	0.146248	0.052526	0.050905	0	0	0.501949	0	0.394778	0.130087	0.156194	0	0.759498	0.568358	0.973119	0	0.210237	0.278281	0	0.052091	0.051133
BnaA01g19480D	0	0	0	0.093723	0	0.067389	0.198706	0	0.826017	0.616597	0.457069	0	0	0	0	0	0	0	0	0	0	0	0	0	0	0
BnaA01g19490D	0.626077	1.21298	0.282621	0	0.231702	1.86517	0.439468	2.13733	0.416428	0.954129	0.509596	0.662363	1.25384	1.25132	1.45057	1.23747	1.15886	1.97547	1.2596	1.35863	1.248	1.16009	2.25525	1.07775	1.69851	1.51756
BnaA01g19500D	0.342147	0.361181	0.373237	0.321047	0.283545	1.36996	1.12669	1.07168	0.644972	0.290822	0.498888	0.391174	0.4705	0.799817	0.537661	0.445988	0.693754	0.665674	0.480491	0.915048	0.791544	0.694404	0.515037	0.758152	0.68736	0.799687
BnaA01g19510D	0	0	0	0	0	0	0	0	0	0	0	0	0	0	0	0	0	0	0	0	0	0	0	0	0	0
BnaA01g19520D	0	0.459964	0	0	0	0.413834	0.324107	0.413197	0.308384	0.373917	0.254449	0.947822	0.272452	0.55124	0.225983	0	0	0.659461	0.168137	0.767841	0.358639	0.547086	0.35157	0.244674	0.561958	0.571755
BnaA01g19530D	0	0.20368	0	0	0.174092	0.547343	0.527112	0.192416	0.1379	0	0.137926	0.823011	1.24105	0.788762	0	0.527392	0	0.423476	0.44493	0.660166	0.178922	0.329535	0.137626	0.468114	0	0.563837
BnaA01g19540D	3.68401	4.12329	2.09037	1.02866	1.16163	3.49172	2.59684	4.44384	3.65637	5.1451	3.3225	13.3194	18.7772	15.4445	1.22142	1.47624	1.60734	5.01253	5.11755	5.44177	2.77297	3.75024	4.47042	3.68187	2.50146	3.8851
BnaA01g19550D	0.228934	0.344104	0.253659	0	0	0	0	0	0.109047	0.110335	0	0	0.050066	0	0	0.20032	0.467667	0.060656	0.339851	0	0	0	0	0.061763	0.061677	0
BnaA01g19560D	0	0	0	0	0	0	0	0	0	0	0	0	0	0	0	0	0	0	0	0	0	0	0	0	0	0
BnaA01g19570D	0	0	0	0	0	0	0	0	0	0	0	0	0	0	0	0	0	0	0	0	0	0	0	0	0	0
BnaA01g19580D	0	0.043355	0	0	0	0.043735	0	0.043074	0	0	0	0	0	0	0	0.088801	0	0	0	0	0	0	0	0	0.044338	0
BnaA01g19590D	0	0.052522	0.078279	0	0.107426	0.107407	0	0.02699	0.017851	0.159144	0	0.167679	0.021625	0.018694	0	0.042673	0.135312	0.053904	0	0	0.156691	0.160239	0.053938	0.105613	0.062665	0
BnaA01g19600D	0	0	0	0	0	0	0	0	0	0	0	0	0	0	0	0	0	0	0	0	0	0	0	0	0	0
BnaA01g19610D	0	0	0	0	0	0	0	0	0	0	0	0	0	0	0	0	0	0	0	0	0	0	0	0	0	0
BnaA01g19620D	0	0	0	0	0	0	0	0	0	0	0	0	0	0	0	0	0	0	0	0	0	0	0	0	0	0
BnaA01g19630D	0	0	0	0	0	0	0	0	0	0	0	0	0	0	0	0	0	0	0	0	0	0	0	0	0	0
BnaA01g19640D	0.809783	0.819352	1.08653	0.223075	0.387944	1.52978	1.59598	1.28026	0.647118	0.247263	0.446144	0.370786	0.397434	0.810526	0.396585	0.673021	0.462876	0.388485	0.579847	0.266802	1.00394	0.694431	0.183153	1.15257	0.615284	1.06917
BnaA01g19650D	3.94113	3.49174	2.27754	0.690916	0.781401	1.38689	1.65085	2.2487	2.67805	2.09855	1.35196	0.366097	0.734802	0.953119	1.91856	1.70025	2.18801	1.46111	3.04956	1.71598	1.00769	1.03382	0.805452	5.49884	4.40943	5.09051
BnaA01g19660D	0	0	0	0	0	0	0	0	0	0	0	0	0	0	0	0	0	0	0	0	0	0	0	0	0	0
BnaA01g19670D	0	0	0	0	0	0	0	0	0	0	0	0	0	0	0	0	0	0	0	0	0	0	0	0	0	0
BnaA01g19680D	0.366169	0.400899	0.361082	0	0.179643	0	0.02039	0	0.280628	0.057857	0.374003	0	0.054425	0.018403	0.079551	0	0	0.01017	0	0.040341	0	0	0	0.040865	0.41081	0.264455
BnaA01g19690D	0	0	0	0	0	0	0	0	0	0	0	0	0	0	0	0	0	0	0	0	0	0	0	0	0	0
BnaA01g19700D	1.39152	0.983743	1.05898	0.886984	0.571832	1.764	1.19995	1.59014	0.961469	1.0265	1.14788	2.79064	2.02428	2.44554	0.849158	1.28302	1.35766	1.72634	1.8472	1.65525	1.47678	1.4661	1.54053	1.08309	1.10519	1.7365
BnaA01g19710D	3.12369	3.06882	2.51001	44.5016	45.3632	44.5272	28.1025	35.6309	4.87101	5.81052	4.15539	48.1865	49.8121	36.3065	8.79213	11.5394	16.1314	17.6914	18.4883	21.7831	6.74381	12.8601	18.706	14.8208	19.2385	20.296
BnaA01g19720D	0	0	0	0.010714	0.010702	0.028987	0	0.01126	0.031478	0.014917	0	0.008406	0.022523	0.030036	0	0	0	0.008472	0	0.02301	0	0	0	0	0	0
BnaA01g19730D	0.313332	0.423881	0.425872	0.234787	0.349388	0.526022	0.410006	0.450638	0.789498	0.338709	0.335713	0.248117	0.517206	0.404703	0.476389	0.401065	0.407195	0.640522	0.565277	0.494504	0.77253	0.487793	0.341258	0.709085	0.351749	0.411526
BnaA01g19740D	0.578584	0.323732	0.384324	0.910622	0.597882	0.496793	0.708746	0.68789	0.566872	0.688315	0.825869	0.730304	0.789239	0.89864	0.434453	0.377044	0.25885	0.670998	0.709246	0.551096	0.478039	1.4842	1.36602	0.995883	0.567487	0.932789
BnaA01g19750D	540.187	511.574	614.466	651.374	576.896	284.938	315.746	435.731	238.202	248.542	301.418	29.9303	21.1644	30.2567	644.091	691.941	711.945	207.502	271.798	225.921	467.152	545.571	522.329	433.695	473.907	422.664
BnaA01g19760D	0	0	0	0	0	0	0	0	0	0	0	0	0	0	0	0	0	0	0	0	0	0	0	0	0	0
BnaA01g19770D	0	0	0	0	0	0	0	0	0	0	0	0	0	0	0	0	0	0	0	0	0	0	0	0	0	0
BnaA01g19780D	0	0	0	0	0	0	0	0	0	0	0	0	0	0	0	0	0	0	0	0	0	0	0	0	0	0
BnaA01g19790D	5.04607	5.93955	4.3471	1.74303	1.88499	1.90806	1.46912	2.37232	2.72358	3.63201	3.70735	1.02415	0.722398	0.869219	1.92858	3.42779	2.3359	1.08262	2.41211	1.6366	1.1092	1.19441	0.8991	4.63367	3.04812	3.60725
BnaA01g19800D	0	0	0	0	0	0	0	0	0	0	0	0	0	0	0	0	0	0	0	0	0	0	0	0	0	0
BnaA01g19810D	0	0	0.709207	0.252632	1.05026	0	0.113443	0	1.16196	0.497943	0	1.21497	0.995802	0	0.456778	0	0.559553	0.789263	0.951406	1.16762	0.70146	0	0	0.766472	0	1.1106
BnaA01g19820D	0	0	0	0	0	0	0	0	0	0	0	0	0	0	0	0	0	0	0	0	0	0	0	0	0	0
BnaA01g19830D	0	0	0	0	0	0	0	0	0	0	0	0	0	0	0	0	0	0	0	0	0	0	0	0	0	0
BnaA01g19840D	0	0	0	0	0	0	0	0	0	0	0	0	0	0	0	0	0	0	0	0	0	0	0	0	0	0
BnaA01g19850D	0	0.136936	0	0.041014	0.085364	0.084489	0.085468	0.147348	0	0	0.084973	0.06259	0.054086	0.086775	0.040636	0.04203	0	0.144051	0.041373	0.042635	0.062256	0.042348	0.147512	0	0	0.085953
BnaA01g19860D	0	0	0	0	0	0	0	0	0	0	0	0	0	0	0	0	0	0	0	0	0	0	0	0	0	0
BnaA01g19870D	8.13683	6.89701	4.19744	5.52572	5.46516	7.11917	10.9023	7.76804	12.1883	22.7214	20.8523	24.6039	26.9384	10.8229	7.06381	9.98442	6.01217	7.19415	7.73767	8.08906	7.7069	5.04467	7.90494	3.88793	6.85164	6.30688
BnaA01g19880D	0	0	0	0	1.00945	14.1595	12.6217	10.1964	2.65442	1.51757	0.251792	1.69665	0.124544	0.891728	0	1.71771	0.656226	0	0.31841	0	1.37847	1.37864	1.88191	0	0	0
BnaA01g19890D	0	0	0	0	0	0	0.462997	0	0	0	0	0	0	0	0	0	0	0	0	0	0	0	0	0.103149	0.189054	0.131741
BnaA01g19900D	0	0	0	0	0	0	0	0	0	0	0	0	0	0	0	0	0	0	0	0	0	0	0	0	0	0
BnaA01g19910D	0	0	0	0	0	0	0	0	0	0	0	0	0	0	0	0	0	0	0	0	0	0	0	0	0	0
BnaA01g19920D	0.050178	0.079737	0.017759	0	0.033311	0.072951	0.253079	0.02642	0.084055	0.084176	0.042245	0.049956	0.039986	0.048893	0.01536	0.025384	0.016905	0.027434	0.033439	0.065959	0.086064	0	0.021169	0.058181	0.078563	0.119259
BnaA01g19930D	0	0	0	0	0.0491	0	0	0	0	0	0	0.022982	0	0	0	0	0	0	0	0	0	0	0	0	0	0
BnaA01g19940D	0.036662	0	0.099517	0.038707	0.140614	0.134477	0.085171	0.240383	0.081731	0	0.036869	0.231957	0.040051	0.279993	0.197814	0.167646	0.312372	0.282238	0.138024	0.410218	0.042422	0.326634	0.254205	0.09214	0.125372	0
BnaA01g19950D	0.04622	0.110823	0	0	0	0	0	0	0	0	0	0	0.063952	0	0.162891	0	0.051738	0	0	0	0.070606	0	0.062209	0	0	0
BnaA01g19960D	0	0.174556	0	0.163866	0.413125	0.25212	0.495196	0.090086	0	0	0	0.044692	0.052955	0	0.089299	0.041907	0	0.101931	0	0.095639	0	0.077638	0	0	0	0
BnaA01g19970D	6.67235	7.71772	6.05141	1.22842	1.58193	4.16901	5.30971	6.14188	4.72038	5.66763	2.89016	4.17223	3.81986	4.40743	1.53584	2.17411	1.5221	2.98542	2.46271	2.70507	1.29374	0.510674	1.33389	5.19499	4.39746	5.3493
BnaA01g19980D	2.83869	3.56806	2.80525	0.655323	0.669261	2.31445	1.48581	3.15268	2.35994	2.68503	1.03342	1.42877	1.57408	2.18304	0.371681	0.836679	0.42601	1.85255	1.05365	0.788064	0.291704	0	0.477818	1.19273	2.13354	1.95598
[truncated: 127,762 more rows]
