# Supplementary material for: Differential alternative splicing genes and isoform co-expression networks of Brassica napus under multiple abiotic stresses
Source: Front Plant Sci. 2022 Oct 13;13:1009998. doi: 10.3389/fpls.2022.1009998 (PMC9608124; doi:10.3389/fpls.2022.1009998)
Supplement: Supplementary file 9 [file Table_3.xlsx]

## Sheet: Readme
Table S3 DAS genes under single abiotic stress or multiple abiotic stresses

## Sheet: dehydration
DAS genes under single dehydration stress
Gene ID	AS_type	Chrome	Darmor ID	AT ID	Gene function	Gene name	AT stress gene	TFs	RBPs
MSTRG.31151	1h_de.A3SS;	chrC03	BnaC03g05100D	AT5G11860	SCP1-like small phosphatase 5	SSP5	NA	NA	NA
MSTRG.11446	1h_de.A3SS;	chrA05	BnaA05g32900D	AT3G04560	nucleolar/coiled-body phosphoprotein;(source:Araport11)	F7O18.3	NA	NA	NA
MSTRG.20273	1h_de.A3SS;	chrA09	BnaA09g31110D	AT1G23350	Plant invertase/pectin methylesterase inhibitor superfamily protein	F26F24.23	NA	NA	NA
MSTRG.53857	1h_de.A3SS;	chrCnn_random	BnaCnng52160D	AT4G36690	U2 snRNP auxilliary factor, large subunit, splicing factor	ATU2AF65A	RARGE-ABA	NA	yes
MSTRG.18886	1h_de.A3SS;	chrA09	BnaA09g06910D	AT5G64600	O-fucosyltransferase family protein	MUB3.12	NA	NA	NA
MSTRG.28298	1h_de.A3SS;	chrC01	BnaC01g39760D	AT3G07650	CONSTANS-like 9	COL9	DRASTIC-COLD, DRASTIC-NACL, RARGE-COLD	CO-like	NA
MSTRG.1305	1h_de.A3SS;1h_de.A3SS;	chrA01	BnaA01g20900D	AT3G49720	transmembrane protein;(source:Araport11)	AT3G49720	NA	NA	NA
MSTRG.50327	1h_de.A5SS;	chrC09	BnaC09g37170D	AT5G20700	Protein of unknown function (DUF581)	T1M15.100	NA	NA	NA
MSTRG.3276	1h_de.A5SS;	chrA02	BnaA02g18660D	AT1G77800	PHD finger family protein	T32E8.13	NA	NA	NA
MSTRG.46170	1h_de.A5SS;	chrC08	BnaC08g07290D	NA	NA	NA	NA	NA	NA
MSTRG.43637	1h_de.A5SS;	chrC07	BnaC07g11580D	AT1G27630	cyclin T 1;3	CYCT1;3	NA	NA	NA
MSTRG.35570	1h_de.A5SS;	chrC04	BnaC04g08890D	AT2G36390	starch branching enzyme 2.1	SBE2.1	NA	NA	NA
MSTRG.52809	1h_de.A5SS;	chrCnn_random	BnaCnng29600D	AT1G26090	P-loop containing nucleoside triphosphate hydrolases superfamily protein	F14G11.6	NA	NA	NA
MSTRG.7030	1h_de.A5SS;	chrA03	BnaA03g46120D	AT3G15980	Coatomer, beta' subunit	AT3G15980	NA	NA	NA
MSTRG.1971	1h_de.MXE;	chrA01	NA	NA	NA	NA	NA	NA	NA
MSTRG.31175	1h_de.RI;	chrC03	BnaC03g05550D	AT5G12310	RING/U-box superfamily protein	AT5G12310	NA	NA	NA
MSTRG.46961	1h_de.RI;	chrC08	NA	NA	NA	NA	NA	NA	NA
MSTRG.373	1h_de.RI;	chrA01	BnaA01g05410D	AT4G39260	cold, circadian rhythm, and RNA binding 1	CCR1	DRASTIC-NACL, RARGE-COLD	NA	yes
MSTRG.893	1h_de.RI;	chrA01	BnaA01g14250D	AT4G24900	coiled coil protein;(source:Araport11)	TTL	NA	NA	NA
MSTRG.33868	1h_de.RI;	chrC03	BnaC03g53380D	AT3G53580	diaminopimelate epimerase family protein	AT3G53580	NA	NA	NA
MSTRG.39915	1h_de.RI;	chrC05	BnaC05g36590D	AT3G16630	P-loop containing nucleoside triphosphate hydrolases superfamily protein	KINESIN-13A	RARGE-ABA	NA	NA
MSTRG.20057	1h_de.RI;	chrA09	BnaA09g27730D	AT1G27840	Transducin/WD40 repeat-like superfamily protein	ATCSA-1	NA	NA	NA
MSTRG.44562	1h_de.RI;	chrC07	BnaC07g28800D	AT5G26742	DEAD box RNA helicase (RH3)	emb1138	NA	NA	yes
MSTRG.16072	1h_de.RI;	chrA07	BnaA07g31020D	AT1G73660	protein tyrosine kinase family protein	F25P22.8	NA	NA	NA
MSTRG.3653	1h_de.SE;	chrA02	BnaA02g26200D	AT2G02080	indeterminate(ID)-domain 4	IDD4	NA	C2H2	NA
MSTRG.34084	1h_de.SE;	chrC03	BnaC03g57790D	NA	NA	NA	NA	NA	NA
MSTRG.30607	1h_de.SE;	chrC02	BnaC02g43420D	AT5G65060	K-box region and MADS-box transcription factor family protein	MAF3	NA	MIKC_MADS	NA
MSTRG.27254	8h_de.A3SS;	chrC01	BnaC01g18160D	NA	NA	NA	NA	NA	NA
MSTRG.30925	8h_de.A3SS;	chrC03	BnaC03g00890D	AT2G37340	arginine/serine-rich zinc knuckle-containing protein 33	RS2Z33	RARGE-ABA, RARGE-COLD	NA	NA
MSTRG.51301	8h_de.A3SS;	chrC09_random	BnaC09g54190D	AT5G18240	myb-related protein 1	MYR1	NA	G2-like	NA
MSTRG.49948	8h_de.A3SS;	chrC09	BnaC09g29810D	AT5G53486	transmembrane protein;(source:Araport11)	AT5G53486	NA	NA	NA
MSTRG.39815	8h_de.A3SS;	chrC05	BnaC05g34700D	AT3G18500	DNAse I-like superfamily protein	AT3G18500	NA	NA	NA
MSTRG.19601	8h_de.A3SS;	chrA09	BnaA09g19610D	AT3G25840	Protein kinase superfamily protein	AT3G25840	NA	NA	NA
MSTRG.8836	8h_de.A3SS;	chrA04	BnaA04g18330D	AT2G31380	salt tolerance homologue	STH	DRASTIC-COLD, RARGE-COLD, RARGE-LIGHT	DBB	NA
MSTRG.17195	8h_de.A3SS;	chrA08	BnaA08g10540D	AT4G22950	AGAMOUS-like 19	AGL19	NA	MIKC_MADS	NA
MSTRG.585	8h_de.A3SS;	chrA01	BnaA01g09030D	AT4G18230	UDP-N-acetylglucosamine transferase subunit ALG14-like protein;(source:Araport11)	T9A21.80	NA	NA	NA
MSTRG.30682	8h_de.A3SS;	chrC02_random	BnaC02g45020D	AT5G66200	armadillo repeat only 2	ARO2	NA	NA	NA
MSTRG.20079	8h_de.A3SS;	chrA09	BnaA09g28020D	AT1G27300	transmembrane protein;(source:Araport11)	F17L21.9	RARGE-NACL	NA	NA
MSTRG.11503	8h_de.A3SS;	chrA05	BnaA05g33830D	AT3G01480	cyclophilin 38	CYP38	NA	NA	NA
MSTRG.30389	8h_de.A3SS;	chrC02	BnaC02g39030D	AT5G49360	beta-xylosidase 1	BXL1	NA	NA	NA
MSTRG.24271	8h_de.A3SS;	chrAnn_random	BnaAnng09540D	AT5G06390	FASCICLIN-like arabinogalactan protein 17 precursor	FLA17	NA	NA	NA
MSTRG.5582	8h_de.A3SS;	chrA03	BnaA03g21950D	AT2G29690	anthranilate synthase 2	ASA2	NA	NA	NA
MSTRG.8945	8h_de.A3SS;	chrA04	BnaA04g20700D	AT2G35660	FAD/NAD(P)-binding oxidoreductase family protein	CTF2A	NA	NA	NA
MSTRG.41514	8h_de.A3SS;	chrC06	NA	NA	NA	NA	NA	NA	NA
MSTRG.14482	8h_de.A3SS;	chrA07	BnaA07g04160D	AT2G15580	RING/U-box superfamily protein	AT2G15580	NA	NA	NA
MSTRG.30519	8h_de.A3SS;	chrC02	BnaC02g41800D	AT5G08130	basic helix-loop-helix (bHLH) DNA-binding superfamily protein	BIM1	NA	bHLH	NA
MSTRG.46506	8h_de.A3SS;	chrC08	BnaC08g13980D	AT1G10090	Early-responsive to dehydration stress protein (ERD4)	T27I1.11	NA	NA	NA
MSTRG.16485	8h_de.A3SS;	chrA07_random	BnaA07g37700D	AT3G53500	RNA-binding (RRM/RBD/RNP motifs) family protein with retrovirus zinc finger-like domain	RS2Z32	RARGE-COLD, RARGE-NACL	NA	yes
MSTRG.15056	8h_de.A3SS;	chrA07	BnaA07g14310D	AT2G28910	CAX interacting protein 4	CXIP4	NA	NA	NA
MSTRG.39327	8h_de.A3SS;8h_de.A5SS;	chrC05	BnaC05g24700D	AT3G28670	oxidoreductase, zinc-binding dehydrogenase family protein	AT3G28670	NA	NA	NA
MSTRG.26862	8h_de.A3SS;8h_de.A5SS;	chrC01	BnaC01g11070D	AT2G32120	heat-shock protein 70T-2	HSP70T-2	NA	NA	NA
MSTRG.33870	8h_de.A3SS;8h_de.RI;	chrC03	BnaC03g53420D	AT3G47860	chloroplastic lipocalin	CHL	NA	NA	NA
MSTRG.50557	8h_de.A3SS;8h_de.RI;	chrC09	BnaC09g41540D	AT4G11340	Disease resistance protein (TIR-NBS-LRR class) family	F8L21.130	NA	NA	NA
MSTRG.12644	8h_de.A5SS;	chrA06	BnaA06g15090D	AT1G21350	Thioredoxin superfamily protein	F24J8.1	NA	NA	NA
MSTRG.7925	8h_de.A5SS;	chrA04	BnaA04g01660D	AT3G59350	Protein kinase superfamily protein	AT3G59350	RARGE-COLD, RARGE-DROUGHT	NA	NA
MSTRG.25225	8h_de.A5SS;	chrAnn_random	BnaAnng26570D	AT2G22980	serine carboxypeptidase-like 13	SCPL13	RARGE-ABA	NA	NA
MSTRG.17315	8h_de.A5SS;	chrA08	BnaA08g12390D	AT4G31720	TBP-associated factor II 15	TAFII15	NA	NA	NA
MSTRG.48625	8h_de.A5SS;	chrC09	BnaC09g02930D	AT5G28030	L-cysteine desulfhydrase 1	DES1	NA	NA	NA
MSTRG.48887	8h_de.A5SS;	chrC09	BnaC09g07820D	AT3G50670	U1 small nuclear ribonucleoprotein-70K	U1-70K	NA	NA	yes
MSTRG.49267	8h_de.A5SS;	chrC09	BnaC09g15170D	AT1G59640	BIG PETAL P	BPEp	NA	NA	NA
MSTRG.34826	8h_de.A5SS;	chrC03_random	BnaC03g72720D	AT2G43820	UDP-glucosyltransferase 74F2	UGT74F2	NA	NA	NA
MSTRG.44138	8h_de.A5SS;	chrC07	NA	NA	NA	NA	NA	NA	NA
MSTRG.37513	8h_de.A5SS;	chrC04	BnaC04g49710D	AT3G20670	histone H2A 13	HTA13	NA	NA	NA
MSTRG.27626	8h_de.A5SS;	chrC01	BnaC01g25020D	AT1G36380	transmembrane protein;(source:Araport11)	F7F23.10	NA	NA	NA
MSTRG.36932	8h_de.A5SS;	chrC04	BnaC04g38240D	AT2G25970	KH domain-containing protein	F17H15.1	NA	NA	NA
MSTRG.40664	8h_de.A5SS;	chrC05_random	BnaC05g50020D	AT1G17680	tetratricopeptide repeat (TPR)-containing protein	F11A6.2	NA	NA	NA
MSTRG.43096	8h_de.RI;	chrC06_random	BnaC06g43550D	AT3G25110	fatA acyl-ACP thioesterase	FaTA	NA	NA	NA
MSTRG.28052	8h_de.RI;	chrC01	NA	NA	NA	NA	NA	NA	NA
MSTRG.40144	8h_de.RI;	chrC05	BnaC05g40320D	AT3G13060	evolutionarily conserved C-terminal region 5	ECT5	NA	NA	NA
MSTRG.14547	8h_de.RI;	chrA07	BnaA07g05140D	AT4G27830	beta glucosidase 10	BGLU10	DRASTIC-COLD, DRASTIC-NACL	NA	NA
MSTRG.43401	8h_de.RI;	chrC07	BnaC07g06720D	AT4G09730	RH39	RH39	NA	NA	NA
MSTRG.33867	8h_de.RI;	chrC03	BnaC03g53360D	AT3G48000	aldehyde dehydrogenase 2B4	ALDH2B4	DRASTIC-DROUGHT	NA	NA
MSTRG.36238	8h_de.RI;	chrC04	BnaC04g23900D	AT3G57930	rho GTPase-activating gacO-like protein;(source:Araport11)	AT3G57930	NA	NA	NA
MSTRG.43765	8h_de.SE;	chrC07	NA	NA	NA	NA	NA	NA	NA
MSTRG.13757	8h_de.SE;	chrA06	NA	NA	NA	NA	NA	NA	NA
MSTRG.17416	8h_de.SE;	chrA08	BnaA08g14210D	AT4G27000	RNA-binding (RRM/RBD/RNP motifs) family protein	ATRBP45C	RARGE-ABA	NA	yes
MSTRG.51305	8h_de.SE;	chrC09_random	BnaC09g54280D	AT5G19220	ADP glucose pyrophosphorylase large subunit 1	APL1	NA	NA	NA
MSTRG.21765	8h_de.SE;	chrA09_random	BnaA09g56260D	AT1G16570	UDP-Glycosyltransferase superfamily protein	F19K19.11	NA	NA	NA
MSTRG.18520	8h_de.SE;	chrA09	BnaA09g00480D	AT4G01960	transmembrane protein;(source:Araport11)	T7B11.22	NA	NA	NA
MSTRG.27677	8h_de.SE;	chrC01	BnaC01g26160D	AT3G49430	SER/ARG-rich protein 34A	SR34a	NA	NA	yes
MSTRG.27069	8h_de.SE;	chrC01	BnaC01g15010D	AT4G23450	RING/U-box superfamily protein	AIRP1	DRASTIC-COLD, DRASTIC-NACL	NA	NA
MSTRG.15345	8h_de.SE;	chrA07	BnaA07g19200D	AT3G62140	NEFA-interacting nuclear protein;(source:Araport11)	AT3G62140	NA	NA	NA
MSTRG.25895	8h_de.SE;	chrAnn_random	BnaAnng37730D	AT2G47730	glutathione S-transferase phi 8	GSTF8	RARGE-ABA, RARGE-DROUGHT, RARGE-LIGHT, RARGE-NACL	NA	NA
MSTRG.42597	8h_de.SE;	chrC06	NA	NA	NA	NA	NA	NA	NA
MSTRG.55285	8h_de.SE;8h_de.A5SS;	chrUnn_random	BnaUnng01270D	AT3G29400	exocyst subunit exo70 family protein E1	EXO70E1	NA	NA	NA
MSTRG.38409	8h_de.SE;8h_de.RI;	chrC05	BnaC05g08090D	AT1G10600	associated molecule with the SH3 domain of STAM 2	AMSH2	NA	NA	NA
MSTRG.33064	1h_de.A3SS;8h_de.A3SS;	chrC03	BnaC03g38550D	AT3G14420	Aldolase-type TIM barrel family protein	GOX1	GEO-UV-B	NA	NA
MSTRG.47101	1h_de.A3SS;8h_de.A3SS;	chrC08	BnaC08g24740D	NA	NA	NA	NA	NA	NA
MSTRG.10580	1h_de.A5SS;8h_de.A5SS;	chrA05	NA	NA	NA	NA	NA	NA	NA
MSTRG.20871	1h_de.A5SS;8h_de.A5SS;	chrA09	BnaA09g40730D	AT2G25970	KH domain-containing protein	F17H15.1	NA	NA	NA
MSTRG.45130	1h_de.A5SS;8h_de.A5SS;	chrC07	BnaC07g38900D	AT4G24440	transcription initiation factor IIA gamma chain / TFIIA-gamma (TFIIA-S)	T22A6.270	NA	NA	NA
MSTRG.42567	1h_de.A5SS;8h_de.A5SS;	chrC06	BnaC06g34510D	AT3G63500	Protein of unknown function (DUF1423)	TTA2	NA	NA	NA
MSTRG.33058	1h_de.A5SS;8h_de.SE;8h_de.A5SS;	chrC03	BnaC03g38360D	AT3G14200	Chaperone DnaJ-domain superfamily protein	AT3G14200	NA	NA	NA
MSTRG.18979	1h_de.SE;8h_de.SE;	chrA09	BnaA09g08260D	AT2G13290	beta-1,4-N-acetylglucosaminyltransferase family protein	F15O11.7	NA	NA	NA

## Sheet: cold
DAS genes under single cold stress
Gene ID	AS_type	Chrome	Darmor ID	AT ID	Gene function	Gene name	AT stress gene	TFs	RBPs
MSTRG.44268	4h_cold.A3SS;	chrC07	BnaC07g23660D	AT3G26580	Tetratricopeptide repeat (TPR)-like superfamily protein	AT3G26580	NA	NA	NA
MSTRG.7485	4h_cold.A3SS;	chrA03	BnaA03g54210D	AT4G37680	heptahelical protein 4	HHP4	NA	NA	NA
MSTRG.13717	4h_cold.A3SS;	chrA06	BnaA06g32810D	AT3G26580	Tetratricopeptide repeat (TPR)-like superfamily protein	AT3G26580	NA	NA	NA
MSTRG.12307	4h_cold.A3SS;	chrA06	BnaA06g09860D	AT1G15200	protein-protein interaction regulator family protein	F9L1.14	RARGE-LIGHT	NA	NA
MSTRG.15188	4h_cold.A3SS;	chrA07	BnaA07g16360D	AT3G54350	Forkhead-associated (FHA) domain-containing protein	emb1967	NA	NA	NA
MSTRG.17488	4h_cold.A3SS;	chrA08	BnaA08g15370D	AT4G36690	U2 snRNP auxilliary factor, large subunit, splicing factor	ATU2AF65A	RARGE-ABA	NA	yes
MSTRG.51489	4h_cold.A3SS;	chrCnn_random	BnaCnng03110D	AT5G03040	IQ-domain 2	iqd2	NA	NA	NA
MSTRG.21729	4h_cold.A3SS;	chrA09_random	BnaA09g55690D	AT3G24495	MUTS homolog 7	MSH7	NA	NA	NA
MSTRG.22302	4h_cold.A3SS;	chrA10	BnaA10g08220D	AT5G54390	HAL2-like	HL	NA	NA	NA
MSTRG.28528	4h_cold.A3SS;	chrC01_random	BnaC01g44190D	AT2G17540	hypothetical protein;(source:Araport11)	MJB20.10	NA	NA	NA
MSTRG.26624	4h_cold.A3SS;	chrC01	BnaC01g06900D	AT4G31550	WRKY DNA-binding protein 11	WRKY11	RARGE-ABA, RARGE-COLD, RARGE-LIGHT	WRKY	NA
MSTRG.24825	4h_cold.A3SS;	chrAnn_random	BnaAnng19630D	AT3G51830	SAC domain-containing protein 8	SAC8	NA	NA	NA
MSTRG.46651	4h_cold.A3SS;	chrC08	BnaC08g16710D	AT1G15500	TLC ATP/ADP transporter	ATNTT2	NA	NA	NA
MSTRG.42521	4h_cold.A3SS;	chrC06	BnaC06g33750D	AT1G72560	ARM repeat superfamily protein	PSD	NA	NA	NA
MSTRG.23274	4h_cold.A3SS;	chrA10	BnaA10g23230D	AT5G08130	basic helix-loop-helix (bHLH) DNA-binding superfamily protein	BIM1	NA	bHLH	NA
MSTRG.26711	4h_cold.A3SS;	chrC01	BnaC01g08450D	AT4G29930	basic helix-loop-helix (bHLH) DNA-binding superfamily protein	F27B13.170	NA	bHLH	NA
MSTRG.47198	4h_cold.A3SS;	chrC08	BnaC08g26270D	AT3G55450	PBS1-like 1	PBL1	RARGE-DROUGHT	NA	NA
MSTRG.40493	4h_cold.A3SS;	chrC05	BnaC05g46010D	AT3G05840	Protein kinase superfamily protein	ATSK12	NA	NA	NA
MSTRG.50920	4h_cold.A3SS;	chrC09	BnaC09g47290D	AT5G08740	NAD(P)H dehydrogenase C1	NDC1	NA	NA	NA
MSTRG.31182	4h_cold.A3SS;	chrC03	BnaC03g05640D	AT5G12840	nuclear factor Y, subunit A1	NF-YA1	NA	NF-YA	NA
MSTRG.2087	4h_cold.A3SS;	chrA01_random	BnaA01g34790D	AT4G31550	WRKY DNA-binding protein 11	WRKY11	RARGE-ABA, RARGE-COLD, RARGE-LIGHT	WRKY	NA
MSTRG.19835	4h_cold.A3SS;	chrA09	BnaA09g23850D	AT1G33240	GT-2-like 1	GTL1	NA	Trihelix	NA
MSTRG.5332	4h_cold.A3SS;	chrA03	BnaA03g17970D	AT2G38640	Protein of unknown function (DUF567)	T6A23.16	NA	NA	NA
MSTRG.53422	4h_cold.A3SS;	chrCnn_random	BnaCnng43100D	AT2G18230	pyrophosphorylase 2	PPa2	NA	NA	NA
MSTRG.5558	4h_cold.A3SS;	chrA03	BnaA03g21690D	AT2G47250	RNA helicase family protein	T8I13.9	NA	NA	NA
MSTRG.14663	4h_cold.A3SS;	chrA07	BnaA07g07050D	AT1G30820	CTP synthase family protein	T17H7.12	NA	NA	NA
MSTRG.40466	4h_cold.A5SS;	chrC05	BnaC05g45490D	AT3G06330	RING/U-box superfamily protein	F24P17.21	NA	NA	NA
MSTRG.12136	4h_cold.A5SS;	chrA06	BnaA06g06700D	AT1G10890	arginine/glutamate-rich 1 protein;(source:Araport11)	T19D16.19	NA	NA	NA
MSTRG.20030	4h_cold.A5SS;	chrA09	BnaA09g27250D	AT1G28420	homeobox-1	HB-1	NA	HB-other	NA
MSTRG.50220	4h_cold.A5SS;	chrC09	BnaC09g35120D	AT5G59780	myb domain protein 59	MYB59	NA	MYB	NA
MSTRG.32724	4h_cold.A5SS;	chrC03	NA	NA	NA	NA	NA	NA	NA
MSTRG.18693	4h_cold.A5SS;	chrA09	BnaA09g03550D	AT5G28030	L-cysteine desulfhydrase 1	DES1	NA	NA	NA
MSTRG.13509	4h_cold.A5SS;	chrA06	NA	NA	NA	NA	NA	NA	NA
MSTRG.30340	4h_cold.A5SS;	chrC02	BnaC02g37960D	AT3G29390	RS2-interacting KH protein	RIK	NA	NA	NA
MSTRG.38426	4h_cold.A5SS;	chrC05	BnaC05g08380D	AT1G10890	arginine/glutamate-rich 1 protein;(source:Araport11)	T19D16.19	NA	NA	NA
MSTRG.34615	4h_cold.A5SS;	chrC03	BnaC03g68530D	AT1G50300	TBP-associated factor 15	TAF15	RARGE-LIGHT	NA	NA
MSTRG.35172	4h_cold.A5SS;	chrC04	BnaC04g01070D	AT2G46270	G-box binding factor 3	GBF3	DRASTIC-COLD, DRASTIC-DROUGHT, DRASTIC-NACL, RARGE-DROUGHT, RARGE-NACL	bZIP	NA
MSTRG.34803	4h_cold.A5SS;	chrC03_random	BnaC03g72230D	AT2G38950	Transcription factor jumonji (jmj) family protein / zinc finger (C5HC2 type) family protein	T7F6.12	NA	NA	NA
MSTRG.45499	4h_cold.A5SS;	chrC07	BnaC07g45720D	AT4G35600	Protein kinase superfamily protein	CST	NA	NA	NA
MSTRG.34983	4h_cold.A5SS;	chrC03_random	BnaC03g75710D	AT1G25290	RHOMBOID-like protein 10	RBL10	NA	NA	NA
MSTRG.24187	4h_cold.A5SS;	chrAnn_random	BnaAnng08090D	AT5G51690	1-amino-cyclopropane-1-carboxylate synthase 12	ACS12	NA	NA	NA
MSTRG.5443	4h_cold.A5SS;	chrA03	NA	NA	NA	NA	NA	NA	NA
MSTRG.15727	4h_cold.MXE;	chrA07	BnaA07g25760D	AT1G66330	senescence-associated family protein	T27F4.8	NA	NA	NA
MSTRG.13635	4h_cold.MXE;	chrA06	BnaA06g31670D	AT3G28100	nodulin MtN21 /EamA-like transporter family protein	UMAMIT45	NA	NA	NA
MSTRG.26437	4h_cold.RI;	chrC01	BnaC01g03770D	AT4G34650	squalene synthase 2	SQS2	NA	NA	NA
MSTRG.24280	4h_cold.RI;	chrAnn_random	BnaAnng09800D	AT2G13790	somatic embryogenesis receptor-like kinase 4	SERK4	DRASTIC-NACL	NA	NA
MSTRG.12583	4h_cold.RI;	chrA06	BnaA06g14200D	AT1G20050	C-8,7 sterol isomerase	HYD1	NA	NA	NA
MSTRG.33704	4h_cold.SE;	chrC03	BnaC03g50580D	AT5G63780	RING/FYVE/PHD zinc finger superfamily protein	SHA1	NA	NA	NA
MSTRG.43549	4h_cold.SE;	chrC07	BnaC07g09890D	AT1G29470	S-adenosyl-L-methionine-dependent methyltransferases superfamily protein	F15D2.5	NA	NA	NA
MSTRG.21126	4h_cold.SE;	chrA09	BnaA09g45250D	AT1G15080	lipid phosphate phosphatase 2	LPP2	NA	NA	NA
MSTRG.49471	4h_cold.SE;	chrC09	BnaC09g20000D	AT5G47100	calcineurin B-like protein 9	CBL9	NA	NA	NA
MSTRG.24504	4h_cold.SE;	chrAnn_random	BnaAnng13790D	NA	NA	NA	NA	NA	NA
MSTRG.32856	4h_cold.SE;	chrC03	BnaC03g34750D	AT3G06480	DEAD box RNA helicase family protein	F24P17.2	NA	NA	yes
MSTRG.1063	4h_cold.SE;	chrA01	BnaA01g16710D	AT4G27870	Vacuolar iron transporter (VIT) family protein	T27E11.110	NA	NA	NA
MSTRG.32309	4h_cold.SE;	chrC03	BnaC03g25720D	AT2G46340	SPA (suppressor of phyA-105) protein family	SPA1	NA	NA	NA
MSTRG.41330	4h_cold.SE;	chrC06	BnaC06g12130D	AT5G37260	Homeodomain-like superfamily protein	RVE2	NA	MYB_related	NA
MSTRG.34330	4h_cold.SE;	chrC03	BnaC03g62500D	AT4G29550	Protein of unknown function (DUF626)	T16L4.60	NA	NA	NA
MSTRG.48266	4h_cold.SE;	chrC08_random	NA	NA	NA	NA	NA	NA	NA
MSTRG.17460	4h_cold.SE;	chrA08	BnaA08g14950D	AT4G35600	Protein kinase superfamily protein	CST	NA	NA	NA
MSTRG.42342	4h_cold.SE;	chrC06	BnaC06g30750D	NA	NA	NA	NA	NA	NA
MSTRG.29393	4h_cold.SE;	chrC02	NA	NA	NA	NA	NA	NA	NA
MSTRG.38669	4h_cold.SE;	chrC05	BnaC05g12690D	AT1G79090	topoisomerase II-associated protein;(source:Araport11)	YUP8H12R.29	NA	NA	NA
MSTRG.42565	4h_cold.SE;	chrC06	BnaC06g34470D	AT1G73660	protein tyrosine kinase family protein	F25P22.8	NA	NA	NA
MSTRG.26187	4h_cold.SE;	chrAnn_random	BnaAnng41910D	AT1G56650	production of anthocyanin pigment 1	PAP1	DRASTIC-NACL	MYB	NA
MSTRG.37818	4h_cold.SE;	chrC04_random	BnaC04g55480D	AT3G57550	guanylate kinase	AGK2	NA	NA	NA
MSTRG.29659	4h_cold.SE;	chrC02	BnaC02g22320D	AT1G73650	Protein of unknown function (DUF1295)	F25P22.7	NA	NA	NA
MSTRG.44127	4h_cold.SE;4h_cold.A3SS;4h_cold.A5SS;	chrC07	BnaC07g21340D	AT2G01890	purple acid phosphatase 8	PAP8	NA	NA	NA
MSTRG.11046	4h_cold.SE;4h_cold.A5SS;	chrA05	BnaA05g27090D	AT1G55310	SC35-like splicing factor 33	SCL33	RARGE-NACL	NA	yes
MSTRG.52601	4h_cold.SE;4h_cold.SE;	chrCnn_random	BnaCnng25160D	NA	NA	NA	NA	NA	NA
MSTRG.37891	24h_cold.A3SS;	chrC04_random	BnaC04g56840D	AT2G41070	Basic-leucine zipper (bZIP) transcription factor family protein	EEL	NA	bZIP	NA
MSTRG.41862	24h_cold.A3SS;	chrC06	BnaC06g21540D	AT1G33240	GT-2-like 1	GTL1	NA	Trihelix	NA
MSTRG.5627	24h_cold.A3SS;	chrA03	BnaA03g22610D	AT2G26800	Aldolase superfamily protein	AT2G26800	RARGE-ABA	NA	NA
MSTRG.14782	24h_cold.A3SS;	chrA07	BnaA07g09480D	NA	NA	NA	NA	NA	NA
MSTRG.42405	24h_cold.A3SS;	chrC06	BnaC06g31900D	AT1G70760	inorganic carbon transport protein-related	NdhL	NA	NA	NA
MSTRG.2504	24h_cold.A3SS;	chrA02	BnaA02g04100D	NA	NA	NA	NA	NA	NA
MSTRG.50673	24h_cold.A3SS;	chrC09	BnaC09g43350D	AT5G13730	sigma factor 4	SIG4	NA	NA	NA
MSTRG.18780	24h_cold.A3SS;	chrA09	BnaA09g05120D	AT5G23890	GPI-anchored adhesin-like protein;(source:Araport11)	MRO11.7	NA	NA	NA
MSTRG.21998	24h_cold.A3SS;	chrA10	BnaA10g02560D	AT1G04410	Lactate/malate dehydrogenase family protein	c-NAD-MDH1	NA	NA	NA
MSTRG.10332	24h_cold.A3SS;	chrA05	BnaA05g14760D	AT1G31280	Argonaute family protein	AGO2	NA	NA	NA
MSTRG.2580	24h_cold.A3SS;	chrA02	BnaA02g05150D	AT5G20935	DUF3148 family protein;(source:Araport11)	CRR42	NA	NA	NA
MSTRG.2281	24h_cold.A3SS;	chrA02	BnaA02g00870D	AT5G11200	DEAD/DEAH box RNA helicase family protein	UAP56b	NA	NA	yes
MSTRG.34750	24h_cold.A3SS;	chrC03_random	BnaC03g71240D	AT5G04430	binding to TOMV RNA 1L (long form)	BTR1L	NA	NA	NA
MSTRG.39923	24h_cold.A3SS;	chrC05	BnaC05g36720D	AT3G16520	UDP-glucosyl transferase 88A1	UGT88A1	NA	NA	NA
MSTRG.29981	24h_cold.A3SS;	chrC02	BnaC02g30140D	AT3G16290	AAA-type ATPase family protein	EMB2083	NA	NA	NA
MSTRG.1289	24h_cold.A3SS;	chrA01	NA	NA	NA	NA	NA	NA	NA
MSTRG.39041	24h_cold.A3SS;	chrC05	BnaC05g19040D	AT1G23890	NHL domain-containing protein	T23E23.6	NA	NA	NA
MSTRG.27771	24h_cold.A3SS;	chrC01	BnaC01g28660D	AT1G60600	UbiA prenyltransferase family protein	ABC4	NA	NA	NA
MSTRG.50651	24h_cold.A3SS;	chrC09	NA	NA	NA	NA	NA	NA	NA
MSTRG.50526	24h_cold.A3SS;	chrC09	BnaC09g41010D	AT5G16840	binding partner of acd11 1	BPA1	NA	NA	NA
MSTRG.15762	24h_cold.A3SS;	chrA07	BnaA07g26340D	NA	NA	NA	NA	NA	NA
MSTRG.12596	24h_cold.A3SS;	chrA06	BnaA06g14330D	AT1G20260	ATPase, V1 complex, subunit B protein	VAB3	NA	NA	NA
MSTRG.44736	24h_cold.A3SS;	chrC07	BnaC07g31300D	AT5G61570	Protein kinase superfamily protein	K11J9.21	NA	NA	NA
MSTRG.34223	24h_cold.A3SS;24h_cold.A3SS;	chrC03	NA	NA	NA	NA	NA	NA	NA
MSTRG.42525	24h_cold.A3SS;24h_cold.A3SS;	chrC06	BnaC06g33790D	AT1G72640	NAD(P)-binding Rossmann-fold superfamily protein	F28P22.17	NA	NA	NA
MSTRG.8657	24h_cold.A3SS;24h_cold.RI;	chrA04	BnaA04g15260D	AT2G25930	hydroxyproline-rich glycoprotein family protein	ELF3	NA	NA	NA
MSTRG.53196	24h_cold.A5SS;	chrCnn_random	BnaCnng37910D	AT5G53180	polypyrimidine tract-binding protein 2	PTB2	NA	NA	NA
MSTRG.26509	24h_cold.A5SS;	chrC01	BnaC01g04730D	AT4G33470	histone deacetylase 14	HDA14	NA	NA	NA
MSTRG.52914	24h_cold.A5SS;	chrCnn_random	BnaCnng31740D	AT3G58030	RING/U-box superfamily protein	AT3G58030	RARGE-COLD, RARGE-LIGHT	NA	NA
MSTRG.34438	24h_cold.A5SS;	chrC03	BnaC03g65170D	AT4G23180	cysteine-rich RLK (RECEPTOR-like protein kinase) 10	CRK10	NA	NA	NA
MSTRG.19543	24h_cold.A5SS;	chrA09	BnaA09g18630D	AT2G01450	MAP kinase 17	MPK17	NA	NA	NA
MSTRG.36570	24h_cold.A5SS;	chrC04	BnaC04g30700D	AT1G66880	Protein kinase superfamily protein	F4N21.1	NA	NA	NA
MSTRG.23897	24h_cold.RI;	chrAnn_random	BnaAnng02600D	AT3G05380	DIRP ;Myb-like DNA-binding domain	ALY2	NA	NA	NA
MSTRG.33107	24h_cold.RI;	chrC03	BnaC03g39300D	AT3G15840	post-illumination chlorophyll fluorescence increase	PIFI	GEO-NACL	NA	NA
MSTRG.12850	24h_cold.RI;	chrA06	BnaA06g18830D	AT3G44600	cyclophilin71	CYP71	NA	NA	NA
MSTRG.9919	24h_cold.RI;	chrA05	BnaA05g07300D	AT2G37170	plasma membrane intrinsic protein 2	PIP2B	DRASTIC-COLD, DRASTIC-NACL	NA	NA
MSTRG.8468	24h_cold.RI;	chrA04	BnaA04g11790D	AT5G40240	nodulin MtN21 /EamA-like transporter family protein	UMAMIT40	NA	NA	NA
MSTRG.9639	24h_cold.RI;	chrA05	BnaA05g02730D	AT2G42300	basic helix-loop-helix (bHLH) DNA-binding superfamily protein	MHK10.2	NA	bHLH	NA
MSTRG.44963	24h_cold.RI;	chrC07	BnaC07g35550D	AT4G18910	NOD26-like intrinsic protein 1;2	NIP1;2	NA	NA	NA
MSTRG.23151	24h_cold.RI;	chrA10	BnaA10g21460D	AT5G10940	transducin family protein / WD-40 repeat family protein	ASG2	NA	NA	NA
MSTRG.34928	24h_cold.RI;	chrC03_random	BnaC03g74530D	AT2G17580	Polynucleotide adenylyltransferase family protein	AGS1	NA	NA	NA
MSTRG.36148	24h_cold.RI;	chrC04	BnaC04g21950D	AT3G61130	galacturonosyltransferase 1	GAUT1	NA	NA	NA
MSTRG.35293	24h_cold.RI;	chrC04	BnaC04g03380D	AT2G44140	Peptidase family C54 protein	F6E13.27	NA	NA	NA
MSTRG.28222	24h_cold.RI;	chrC01	BnaC01g38060D	AT3G13040	myb-like HTH transcriptional regulator family protein	MGH6.22	NA	G2-like	NA
MSTRG.3850	24h_cold.RI;	chrA02	BnaA02g29890D	AT3G29390	RS2-interacting KH protein	RIK	NA	NA	NA
MSTRG.3387	24h_cold.RI;	chrA02	BnaA02g20560D	AT4G02460	DNA mismatch repair protein, putative	PMS1	NA	NA	NA
MSTRG.40530	24h_cold.SE;	chrC05	BnaC05g46620D	AT3G05165	Major facilitator superfamily protein	AT3G05165	NA	NA	NA
MSTRG.17128	24h_cold.SE;	chrA08	BnaA08g09100D	AT4G19160	transglutaminase family protein;(source:Araport11)	T18B16.130	NA	NA	NA
MSTRG.16745	24h_cold.SE;	chrA08	BnaA08g02230D	AT1G50140	P-loop containing nucleoside triphosphate hydrolases superfamily protein	F2J10.1	NA	NA	NA
MSTRG.18001	24h_cold.SE;	chrA08	BnaA08g23890D	AT1G15350	DUF4050 family protein;(source:Araport11)	F9L1.29	NA	NA	NA
MSTRG.11474	24h_cold.SE;	chrA05	BnaA05g33370D	AT3G02750	Protein phosphatase 2C family protein	F13E7.31	NA	NA	NA
MSTRG.8081	24h_cold.SE;	chrA04	BnaA04g04510D	AT3G53830	Regulator of chromosome condensation (RCC1) family protein	AT3G53830	NA	NA	NA
MSTRG.30873	24h_cold.SE;	chrC03	BnaC03g00040D	AT1G01060	Homeodomain-like superfamily protein	LHY	DRASTIC-COLD, RARGE-COLD	MYB_related	NA
MSTRG.29856	24h_cold.SE;	chrC02	BnaC02g27110D	AT3G01320	SIN3-like 1	SNL1	NA	NA	NA
MSTRG.34123	24h_cold.SE;	chrC03	BnaC03g58610D	AT1G28395	hypothetical protein;(source:Araport11)	AT1G28395	NA	NA	NA
MSTRG.53540	24h_cold.SE;	chrCnn_random	BnaCnng45490D	AT4G16845	VEFS-Box of polycomb protein	VRN2	NA	NA	NA
MSTRG.13098	24h_cold.SE;	chrA06	BnaA06g23320D	AT5G64170	dentin sialophosphoprotein-related	LNK1	NA	NA	NA
MSTRG.18141	24h_cold.SE;24h_cold.A3SS;	chrA08	BnaA08g26070D	AT1G09932	Phosphoglycerate mutase family protein	AT1G09932	NA	NA	NA
MSTRG.19268	24h_cold.SE;24h_cold.A5SS;	chrA09	NA	NA	NA	NA	NA	NA	NA
MSTRG.12560	24h_cold.SE;24h_cold.A5SS;	chrA06	BnaA06g13890D	AT1G19720	Pentatricopeptide repeat (PPR-like) superfamily protein	F14P1.33	NA	NA	NA
MSTRG.17688	24h_cold.SE;24h_cold.SE;	chrA08	BnaA08g18350D	AT1G28395	hypothetical protein;(source:Araport11)	AT1G28395	NA	NA	NA
MSTRG.32717	4h_cold.A3SS;4h_cold.RI;24h_cold.A3SS;	chrC03	BnaC03g32450D	AT3G01540	DEAD box RNA helicase 1	DRH1	DRASTIC-COLD, RARGE-ABA, RARGE-COLD, RARGE-NACL, RARGE-REHYDRATION	NA	yes
MSTRG.49628	4h_cold.A5SS;24h_cold.A5SS;	chrC09	BnaC09g22980D	AT1G54460	TPX2 (targeting protein for Xklp2) protein family	F20D21.28	NA	NA	NA
MSTRG.26121	4h_cold.A5SS;24h_cold.A5SS;	chrAnn_random	BnaAnng41010D	AT3G17860	jasmonate-zim-domain protein 3	JAZ3	RARGE-DROUGHT, RARGE-NACL	NA	NA
MSTRG.15958	4h_cold.A5SS;24h_cold.A5SS;	chrA07	BnaA07g29290D	AT1G71360	Galactose-binding protein	AtSUN4	NA	NA	NA
MSTRG.11411	4h_cold.SE;24h_cold.SE;	chrA05	BnaA05g32290D	AT3G02990	heat shock transcription factor A1E	HSFA1E	NA	NA	NA
MSTRG.50850	4h_cold.SE;4h_cold.A3SS;24h_cold.A3SS;	chrC09	BnaC09g46240D	AT5G44050	MATE efflux family protein	MRH10.16	NA	NA	NA
MSTRG.21890	4h_cold.SE;4h_cold.A3SS;4h_cold.A3SS;4h_cold.RI;24h_cold.RI;	chrA10	BnaA10g00780D	AT1G01060	Homeodomain-like superfamily protein	LHY	DRASTIC-COLD, RARGE-COLD	MYB_related	NA

## Sheet: ABA
DAS genes under single ABA stress
Gene ID	AS_type	Chrome	Darmor ID	AT ID	Gene function	Gene name	AT stress gene	TFs	RBPs
MSTRG.44166	4h_ABA.A3SS;	chrC07	BnaC07g21990D	AT2G02870	Galactose oxidase/kelch repeat superfamily protein	T17M13.4	NA	NA	NA
MSTRG.28478	4h_ABA.A3SS;	chrC01_random	BnaC01g43240D	AT1G60800	NSP-interacting kinase 3	NIK3	NA	NA	NA
MSTRG.4589	4h_ABA.A3SS;	chrA03	BnaA03g05160D	AT5G15020	SIN3-like 2	SNL2	NA	NA	NA
MSTRG.49522	4h_ABA.SE;	chrC09	NA	NA	NA	NA	NA	NA	NA
MSTRG.12046	4h_ABA.SE;	chrA06	BnaA06g05190D	AT1G08910	zinc ion binding;zinc ion binding	F7G19.21	NA	NA	NA
MSTRG.36680	4h_ABA.SE;	chrC04	BnaC04g32920D	AT5G40810	Cytochrome C1 family	MHK7.4	NA	NA	NA
MSTRG.4016	24h_ABA.A3SS;	chrA02	BnaA02g33090D	AT5G61960	MEI2-like protein 1	ML1	NA	NA	NA
MSTRG.4691	24h_ABA.A3SS;	chrA03	BnaA03g06900D	AT5G18120	APR-like 7	APRL7	NA	NA	NA
MSTRG.6362	24h_ABA.A3SS;	chrA03	BnaA03g34680D	AT3G17700	cyclic nucleotide-binding transporter 1	CNBT1	NA	NA	NA
MSTRG.51518	24h_ABA.A5SS;	chrCnn_random	BnaCnng03510D	AT5G02470	Transcription factor DP	DPA	NA	E2F/DP	NA
MSTRG.18393	24h_ABA.A5SS;	chrA08_random	BnaA08g30210D	AT4G17150	alpha/beta-Hydrolases superfamily protein	DL4610W	NA	NA	NA
MSTRG.49839	24h_ABA.A5SS;	chrC09	NA	NA	NA	NA	NA	NA	NA
MSTRG.22572	24h_ABA.A5SS;	chrA10	BnaA10g12770D	AT5G59780	myb domain protein 59	MYB59	NA	MYB	NA
MSTRG.53010	24h_ABA.A5SS;24h_ABA.RI;	chrCnn_random	BnaCnng33800D	AT1G79940	DnaJ / Sec63 Brl domains-containing protein	ATERDJ2A	NA	NA	NA
MSTRG.1501	24h_ABA.MXE;	chrA01	NA	NA	NA	NA	NA	NA	NA
MSTRG.8592	24h_ABA.RI;	chrA04	BnaA04g13930D	AT2G23820	Metal-dependent phosphohydrolase	T29E15.2	NA	NA	NA
MSTRG.9069	24h_ABA.RI;	chrA04	BnaA04g22940D	AT2G39580	zinc finger C3H1 domain protein;(source:Araport11)	F12L6.24	NA	NA	NA
MSTRG.30317	24h_ABA.RI;	chrC02	BnaC02g37460D	AT5G38660	acclimation of photosynthesis to environment	APE1	NA	NA	NA
MSTRG.5701	24h_ABA.SE;	chrA03	BnaA03g23740D	AT4G08690	Sec14p-like phosphatidylinositol transfer family protein	T32A17.1	NA	NA	NA
MSTRG.12572	24h_ABA.SE;	chrA06	BnaA06g14020D	NA	NA	NA	NA	NA	NA

## Sheet: NaCl
DAS genes under single NaCl stress
Gene ID	AS_type	Chrome	Darmor ID	AT ID	Gene function	Gene name	AT stress gene	TFs	RBPs
MSTRG.35531	4h_NaCl.A3SS;	chrC04	BnaC04g08160D	AT2G37080	ROP interactive partner 3	RIP2	NA	NA	NA
MSTRG.17599	4h_NaCl.A3SS;	chrA08	BnaA08g17070D	AT4G38520	Protein phosphatase 2C family protein	APD6	NA	NA	NA
MSTRG.41198	4h_NaCl.A3SS;	chrC06	BnaC06g09170D	AT2G18040	peptidylprolyl cis/trans isomerase, NIMA-interacting 1	PIN1AT	NA	NA	NA
MSTRG.12328	4h_NaCl.A3SS;	chrA06	BnaA06g10130D	AT1G15420	WD repeat protein;(source:Araport11)	AT1G15420	NA	NA	NA
MSTRG.32381	4h_NaCl.A3SS;	chrC03	BnaC03g26840D	AT2G24820	translocon at the inner envelope membrane of chloroplasts 55-II	TIC55-II	NA	NA	NA
MSTRG.6759	4h_NaCl.A3SS;	chrA03	BnaA03g41190D	AT3G51140	Protein of unknown function (DUF3353)	AT3G51140	RARGE-LIGHT	NA	NA
MSTRG.35636	4h_NaCl.A3SS;	chrC04	BnaC04g10230D	AT2G35120	Single hybrid motif superfamily protein	T4C15.21	NA	NA	NA
MSTRG.38855	4h_NaCl.A3SS;	chrC05	BnaC05g15760D	AT3G60750	Transketolase	AtTKL1	NA	NA	NA
MSTRG.22103	4h_NaCl.A3SS;	chrA10	BnaA10g04470D	AT1G07010	Calcineurin-like metallo-phosphoesterase superfamily protein	SLP1	RARGE-LIGHT	NA	NA
MSTRG.30702	4h_NaCl.A5SS;	chrC02_random	BnaC02g45340D	AT4G26690	PLC-like phosphodiesterase family protein	SHV3	RARGE-ABA	NA	NA
MSTRG.22626	4h_NaCl.A5SS;	chrA10	BnaA10g13800D	AT5G22650	histone deacetylase 2B	HD2B	NA	NA	NA
MSTRG.34221	4h_NaCl.A5SS;	chrC03	BnaC03g60170D	AT4G38770	proline-rich protein 4	PRP4	DRASTIC-DROUGHT, DRASTIC-NACL, RARGE-COLD, RARGE-REHYDRATION	NA	NA
MSTRG.26225	4h_NaCl.RI;	chrC01	BnaC01g00600D	AT4G39710	FK506-binding protein 16-2	PnsL4	NA	NA	NA
MSTRG.13235	4h_NaCl.RI;	chrA06	BnaA06g25320D	AT2G18300	basic helix-loop-helix (bHLH) DNA-binding superfamily protein	HBI1	NA	bHLH	NA
MSTRG.22160	4h_NaCl.RI;	chrA10	NA	NA	NA	NA	NA	NA	NA
MSTRG.52176	4h_NaCl.RI;	chrCnn_random	BnaCnng17350D	AT4G25830	Uncharacterised protein family (UPF0497)	CASP-like protein 2C1	NA	NA	NA
MSTRG.53526	4h_NaCl.SE;	chrCnn_random	BnaCnng45130D	AT1G02305	Cysteine proteinases superfamily protein	AT1G02305	NA	NA	NA
MSTRG.38321	24h_NaCl.A3SS;	chrC05	BnaC05g06630D	AT1G09140	SERINE-ARGININE PROTEIN 30	SR30	NA	NA	yes
MSTRG.34706	24h_NaCl.A5SS;	chrC03	BnaC03g70430D	AT3G13570	SC35-like splicing factor 30A	SCL30A	NA	NA	yes
MSTRG.40528	24h_NaCl.A5SS;	chrC05	BnaC05g46590D	AT3G01420	Peroxidase superfamily protein	DOX1	DRASTIC-DROUGHT	NA	NA
MSTRG.7969	24h_NaCl.RI;	chrA04	BnaA04g02520D	AT2G40510	Ribosomal protein S26e family protein	T2P4.14	NA	NA	NA
MSTRG.48993	24h_NaCl.SE;	chrC09	NA	NA	NA	NA	NA	NA	NA
BnaA08g21360D	24h_NaCl.SE;	chrA08	BnaA08g21360D	AT1G21400	Thiamin diphosphate-binding fold (THDP-binding) superfamily protein	F24J8.4	NA	NA	NA
MSTRG.39940	24h_NaCl.SE;	chrC05	BnaC05g37150D	AT3G16250	NDH-dependent cyclic electron flow 1	PnsB3	NA	NA	NA
MSTRG.33758	4h_NaCl.SE;24h_NaCl.SE;	chrC03	BnaC03g51470D	AT5G62760	P-loop containing nucleoside triphosphate hydrolases superfamily protein	MQB2.8	NA	NA	NA

## Sheet: multiple stresses
DAS genes under multiple stresses
Gene ID	AS_type	Chrome	Darmor ID	AT ID	Gene function	Gene name	AT stress gene	TFs	RBPs
MSTRG.19531	1h_de.A5SS;8h_de.A5SS;4h_cold.A5SS;24h_cold.A5SS;4h_ABA.A5SS;24h_ABA.A5SS;4h_NaCl.A5SS;24h_NaCl.A5SS;	chrA09	BnaA09g18440D	AT5G47720	Thiolase family protein	AACT1	NA	NA	NA
MSTRG.51636	1h_de.A5SS;1h_de.A5SS;8h_de.A5SS;8h_de.A5SS;4h_cold.A5SS;24h_cold.A5SS;4h_ABA.A5SS;4h_ABA.A5SS;4h_NaCl.A5SS;4h_NaCl.A5SS;24h_NaCl.A5SS;24h_NaCl.A5SS;24h_NaCl.A5SS;	chrCnn_random	BnaCnng05580D	AT3G01500	carbonic anhydrase 1	CA1	DRASTIC-COLD, DRASTIC-DROUGHT, DRASTIC-NACL	NA	NA
MSTRG.51415	1h_de.A3SS;8h_de.A3SS;24h_cold.A3SS;4h_ABA.A3SS;24h_ABA.A3SS;4h_NaCl.A3SS;24h_NaCl.A3SS;	chrCnn_random	BnaCnng01510D	AT4G01550	NAC domain containing protein 69	NAC069	NA	NAC	NA
MSTRG.926	1h_de.RI;8h_de.RI;24h_cold.RI;4h_ABA.RI;24h_ABA.RI;4h_NaCl.RI;24h_NaCl.RI;	chrA01	BnaA01g14750D	AT4G25500	arginine/serine-rich splicing factor 35	RS40	RARGE-ABA, RARGE-COLD	NA	yes
MSTRG.51009	8h_de.RI;4h_cold.RI;24h_cold.RI;24h_ABA.RI;4h_NaCl.RI;24h_NaCl.RI;	chrC09	BnaC09g48780D	AT5G12110	Glutathione S-transferase, C-terminal-like;Translation elongation factor EF1B/ribosomal protein S6	MXC9.7	NA	NA	NA
MSTRG.30043	1h_de.SE;8h_de.SE;4h_cold.SE;24h_ABA.SE;4h_NaCl.RI;24h_NaCl.SE;	chrC02	NA	NA	NA	NA	NA	NA	NA
MSTRG.46436	8h_de.RI;24h_cold.RI;4h_ABA.RI;24h_ABA.RI;4h_NaCl.RI;	chrC08	BnaC08g12770D	NA	NA	NA	NA	NA	NA
MSTRG.37091	1h_de.RI;8h_de.RI;4h_cold.RI;24h_cold.RI;4h_NaCl.RI;	chrC04	BnaC04g41100D	AT2G30440	thylakoid processing peptide	TPP	RARGE-NACL	NA	NA
MSTRG.1012	8h_de.SE;4h_ABA.SE;4h_NaCl.SE;24h_NaCl.SE;	chrA01	BnaA01g16060D	AT4G27000	RNA-binding (RRM/RBD/RNP motifs) family protein	ATRBP45C	RARGE-ABA	NA	yes
MSTRG.22791	8h_de.A5SS;24h_cold.A5SS;4h_ABA.A5SS;4h_NaCl.A5SS;24h_NaCl.A5SS;	chrA10	BnaA10g16330D	AT5G18630	alpha/beta-Hydrolases superfamily protein	T1A4.10	NA	NA	NA
MSTRG.49414	1h_de.A5SS;8h_de.A5SS;4h_cold.A5SS;4h_NaCl.A5SS;24h_NaCl.A5SS;	chrC09	BnaC09g18620D	AT5G45710	winged-helix DNA-binding transcription factor family protein	RHA1	NA	HSF	NA
MSTRG.7261	1h_de.A3SS;8h_de.A3SS;24h_cold.A3SS;24h_ABA.A3SS;4h_NaCl.A3SS;	chrA03	BnaA03g50200D	AT4G30490	AFG1-like ATPase family protein	F17I23.170	GEO-IRON	NA	NA
MSTRG.7680	8h_de.A5SS;24h_ABA.A5SS;4h_NaCl.A5SS;24h_NaCl.A5SS;	chrA03_random	BnaA03g57280D	AT1G56220	Dormancy/auxin associated family protein	F14G9.17	RARGE-NACL	NA	NA
MSTRG.53131	8h_de.A3SS;24h_cold.A3SS;4h_NaCl.A3SS;24h_NaCl.A3SS;	chrCnn_random	BnaCnng36650D	AT3G52090	DNA-directed RNA polymerase, RBP11-like	NRPB11	NA	NA	NA
MSTRG.18346	8h_de.SE;4h_cold.SE;4h_cold.SE;24h_cold.SE;24h_cold.SE;24h_ABA.SE;24h_ABA.SE;	chrA08_random	BnaA08g29480D	AT1G51200	A20/AN1-like zinc finger family protein	F11M15.7	NA	NA	NA
MSTRG.35994	1h_de.A5SS;8h_de.A5SS;24h_cold.A5SS;4h_NaCl.A5SS;	chrC04	BnaC04g17900D	AT5G42560	Abscisic acid-responsive (TB2/DP1, HVA22) family protein	K16E1.3	NA	NA	NA
MSTRG.51635	8h_de.SE;4h_ABA.SE;4h_NaCl.SE;24h_NaCl.SE;	chrCnn_random	BnaCnng05570D	AT3G01540	DEAD box RNA helicase 1	DRH1	DRASTIC-COLD, RARGE-ABA, RARGE-COLD, RARGE-NACL, RARGE-REHYDRATION	NA	yes
MSTRG.39031	1h_de.A5SS;8h_de.A5SS;24h_cold.A5SS;4h_NaCl.A5SS;	chrC05	BnaC05g18760D	AT1G23440	Peptidase C15, pyroglutamyl peptidase I-like	F28C11.26	NA	NA	NA
MSTRG.8133	24h_cold.A5SS;24h_ABA.SE;4h_NaCl.A5SS;24h_NaCl.A5SS;	chrA04	BnaA04g05540D	AT3G52310	ABC-2 type transporter family protein	ABCG27	NA	NA	NA
MSTRG.50841	24h_cold.A5SS;4h_ABA.A5SS;24h_ABA.A5SS;24h_NaCl.A5SS;	chrC09	BnaC09g45930D	AT5G10650	RING/U-box superfamily protein	MAJ23.10	NA	NA	NA
MSTRG.14126	1h_de.SE;1h_de.SE;8h_de.SE;4h_cold.SE;24h_cold.SE;24h_cold.SE;	chrA06_random	BnaA06g38980D	AT3G44300	nitrilase 2	NIT2	DRASTIC-DROUGHT, DRASTIC-NACL, RARGE-ABA, RARGE-COLD, RARGE-NACL	NA	NA
MSTRG.36117	1h_de.A3SS;8h_de.A3SS;24h_cold.A3SS;24h_NaCl.A3SS;	chrC04	BnaC04g21400D	AT3G62260	Protein phosphatase 2C family protein	AT3G62260	NA	NA	NA
MSTRG.14394	1h_de.A3SS;1h_de.RI;1h_de.RI;8h_de.RI;24h_cold.A3SS;24h_cold.RI;4h_ABA.RI;4h_ABA.RI;	chrA07	BnaA07g02570D	NA	NA	NA	NA	NA	NA
MSTRG.21319	8h_de.RI;24h_cold.RI;4h_NaCl.RI;	chrA09	BnaA09g48800D	AT1G08630	threonine aldolase 1	THA1	NA	NA	NA
MSTRG.50604	1h_de.SE;1h_de.A5SS;8h_de.SE;8h_de.A5SS;4h_NaCl.SE;	chrC09	BnaC09g42270D	AT5G38280	PR5-like receptor kinase	PR5K	NA	NA	NA
MSTRG.52023	1h_de.RI;8h_de.RI;4h_ABA.RI;	chrCnn_random	BnaCnng14560D	AT5G54110	membrane-associated mannitol-induced	MAMI	NA	NA	NA
MSTRG.51018	1h_de.RI;8h_de.RI;4h_ABA.RI;	chrC09	BnaC09g48950D	NA	NA	NA	NA	NA	NA
MSTRG.27581	8h_de.A3SS;24h_cold.A3SS;24h_cold.A5SS;4h_NaCl.A3SS;	chrC01	BnaC01g23810D	AT3G50660	Cytochrome P450 superfamily protein	DWF4	NA	NA	NA
MSTRG.9519	1h_de.RI;8h_de.RI;4h_cold.RI;	chrA05	BnaA05g01050D	AT2G46830	circadian clock associated 1	CCA1	DRASTIC-COLD, DRASTIC-DROUGHT	MYB_related	NA
MSTRG.13806	8h_de.A3SS;24h_ABA.A3SS;24h_NaCl.A3SS;	chrA06	BnaA06g34090D	AT2G02570	nucleic acid binding;RNA binding	T8K22.13	NA	NA	NA
MSTRG.47972	4h_ABA.RI;24h_ABA.RI;24h_NaCl.RI;	chrC08	BnaC08g39860D	AT1G14170	RNA-binding KH domain-containing protein	F7A19.25	NA	NA	yes
MSTRG.36434	4h_cold.SE;24h_ABA.SE;24h_NaCl.SE;	chrC04	BnaC04g28280D	AT3G52310	ABC-2 type transporter family protein	ABCG27	NA	NA	NA
MSTRG.34246	8h_de.A5SS;4h_ABA.A5SS;4h_NaCl.A5SS;	chrC03	BnaC03g60490D	AT4G39260	cold, circadian rhythm, and RNA binding 1	CCR1	DRASTIC-NACL, RARGE-COLD	NA	yes
MSTRG.5778	4h_ABA.A3SS;4h_NaCl.A3SS;24h_NaCl.A3SS;	chrA03	BnaA03g25050D	AT4G12320	cytochrome P450, family 706, subfamily A, polypeptide 6	CYP706A6	NA	NA	NA
MSTRG.46125	24h_cold.A3SS;24h_cold.RI;24h_ABA.A3SS;24h_ABA.RI;24h_NaCl.RI;	chrC08	BnaC08g06400D	AT1G23580	Domain of unknown function DUF220	F28C11.28	NA	NA	NA
MSTRG.1550	8h_de.SE;8h_de.A3SS;4h_cold.A3SS;24h_cold.SE;24h_cold.A3SS;	chrA01	BnaA01g25610D	AT3G20650	mRNA capping enzyme family protein	AT3G20650	NA	NA	NA
MSTRG.37371	1h_de.A5SS;8h_de.A5SS;24h_cold.A5SS;	chrC04	BnaC04g46890D	NA	NA	NA	NA	NA	NA
MSTRG.43435	1h_de.A3SS;8h_de.A3SS;24h_cold.A3SS;	chrC07	NA	NA	NA	NA	NA	NA	NA
MSTRG.42942	8h_de.A3SS;4h_NaCl.A3SS;24h_NaCl.A3SS;	chrC06	BnaC06g40580D	AT2G47580	spliceosomal protein U1A	U1A	NA	NA	yes
MSTRG.35503	8h_de.A5SS;24h_ABA.A5SS;4h_NaCl.A5SS;	chrC04	BnaC04g07710D	AT2G37678	far-red elongated hypocotyl 1	FHY1	NA	NA	NA
MSTRG.29865	8h_de.RI;24h_cold.RI;4h_NaCl.RI;	chrC02	BnaC02g27330D	AT1G76310	CYCLIN B2;4	CYCB2;4	NA	NA	NA
MSTRG.9406	1h_de.SE;8h_de.SE;24h_cold.SE;	chrA04_random	BnaA04g29090D	AT2G35040	AICARFT/IMPCHase bienzyme family protein	F19I3.27	NA	NA	NA
MSTRG.13936	8h_de.A5SS;24h_cold.A5SS;4h_NaCl.A5SS;	chrA06	BnaA06g36130D	AT5G46190	RNA-binding KH domain-containing protein	MCL19.25	NA	NA	yes
MSTRG.20621	1h_de.A5SS;1h_de.RI;8h_de.A3SS;8h_de.A5SS;24h_cold.A3SS;24h_cold.A5SS;	chrA09	BnaA09g36770D	AT2G41790	Insulinase (Peptidase family M16) family protein	T11A7.11	NA	NA	NA
MSTRG.36377	1h_de.SE;8h_de.SE;24h_cold.SE;	chrC04	BnaC04g26840D	AT3G53830	Regulator of chromosome condensation (RCC1) family protein	AT3G53830	NA	NA	NA
MSTRG.28410	8h_de.A3SS;4h_cold.A5SS;	chrC01_random	BnaC01g41640D	AT4G25500	arginine/serine-rich splicing factor 35	RS40	RARGE-ABA, RARGE-COLD	NA	yes
MSTRG.49553	1h_de.A3SS;1h_de.A3SS;24h_cold.A3SS;	chrC09	BnaC09g21600D	AT3G25840	Protein kinase superfamily protein	AT3G25840	NA	NA	NA
MSTRG.26902	1h_de.A3SS;4h_NaCl.A3SS;	chrC01	BnaC01g11840D	NA	NA	NA	NA	NA	NA
MSTRG.28514	1h_de.A5SS;24h_cold.A5SS;	chrC01_random	BnaC01g43970D	AT3G17205	ubiquitin protein ligase 6	UPL6	NA	NA	NA
MSTRG.20488	1h_de.A5SS;4h_NaCl.A5SS;	chrA09	BnaA09g34710D	AT3G54880	zinc finger protein;(source:Araport11)	AT3G54880	NA	NA	NA
MSTRG.46528	1h_de.SE;1h_de.A5SS;4h_NaCl.SE;4h_NaCl.A5SS;	chrC08	BnaC08g14470D	AT1G10650	SBP (S-ribonuclease binding protein) family protein	F20B24.9	NA	NA	NA
MSTRG.32201	1h_de.SE;24h_ABA.SE;	chrC03	BnaC03g23650D	AT2G42240	RNA-binding (RRM/RBD/RNP motifs) family protein	T24P15.15	NA	NA	yes
MSTRG.31297	24h_ABA.A3SS;24h_NaCl.A3SS;	chrC03	BnaC03g07540D	AT5G16030	mental retardation GTPase activating protein;(source:Araport11)	F1N13.170	NA	NA	NA
MSTRG.10011	24h_cold.A3SS;24h_ABA.A3SS;	chrA05	BnaA05g08820D	AT2G35120	Single hybrid motif superfamily protein	T4C15.21	NA	NA	NA
MSTRG.6776	24h_cold.A3SS;4h_ABA.A3SS;	chrA03	BnaA03g41520D	AT3G51880	high mobility group B1	HMGB1	NA	NA	NA
MSTRG.32440	24h_cold.A3SS;4h_NaCl.SE;	chrC03	BnaC03g27690D	AT5G50240	protein-l-isoaspartate methyltransferase 2	PIMT2	NA	NA	NA
MSTRG.24619	24h_cold.A5SS;4h_ABA.A5SS;	chrAnn_random	BnaAnng15970D	AT5G17670	alpha/beta-Hydrolases superfamily protein	MVA3.2	NA	NA	NA
MSTRG.25715	24h_cold.A5SS;4h_NaCl.A5SS;	chrAnn_random	NA	NA	NA	NA	NA	NA	NA
MSTRG.49105	4h_ABA.RI;4h_NaCl.RI;	chrC09	BnaC09g11570D	AT1G63830	PLAC8 family protein	T12P18.15	NA	NA	NA
MSTRG.1717	4h_cold.A5SS;4h_ABA.A5SS;	chrA01	BnaA01g28800D	AT3G15354	SPA1-related 3	SPA3	NA	NA	NA
MSTRG.28675	4h_cold.A5SS;4h_NaCl.A5SS;	chrC02	BnaC02g01960D	AT5G06530	ABC-2 type transporter family protein	ABCG22	NA	NA	NA
MSTRG.51710	4h_cold.SE;24h_NaCl.SE;	chrCnn_random	BnaCnng07660D	AT1G72050	transcription factor IIIA	TFIIIA	NA	C2H2	NA
MSTRG.40702	4h_cold.SE;4h_cold.SE;4h_cold.A3SS;4h_cold.A5SS;24h_ABA.SE;	chrC05_random	BnaC05g50970D	AT1G26790	Dof-type zinc finger DNA-binding family protein	T24P13.17	NA	Dof	NA
MSTRG.38143	8h_de.A3SS;24h_ABA.A3SS;	chrC05	BnaC05g04010D	AT1G05870	Protein of unknown function (DUF1685)	T20M3.14	NA	NA	NA
MSTRG.32688	8h_de.A3SS;24h_ABA.A3SS;	chrC03	BnaC03g32070D	AT4G00520	Acyl-CoA thioesterase family protein	AT4G00520	NA	NA	NA
MSTRG.40834	8h_de.A3SS;24h_cold.A3SS;24h_cold.A3SS;	chrC06	BnaC06g01680D	AT1G65500	transmembrane protein;(source:Araport11)	F5I14.4	NA	NA	NA
MSTRG.51551	8h_de.A3SS;4h_cold.A3SS;	chrCnn_random	BnaCnng03930D	AT5G01310	APRATAXIN-like	APTX	NA	NA	NA
MSTRG.49708	8h_de.A3SS;4h_NaCl.A3SS;	chrC09	BnaC09g24560D	AT1G20850	xylem cysteine peptidase 2	XCP2	NA	NA	NA
MSTRG.51055	8h_de.A3SS;4h_NaCl.A3SS;	chrC09	BnaC09g49480D	AT5G05930	guanylyl cyclase 1	GC1	NA	NA	NA
MSTRG.23138	8h_de.A5SS;24h_NaCl.A5SS;	chrA10	BnaA10g21260D	AT5G11200	DEAD/DEAH box RNA helicase family protein	UAP56b	NA	NA	yes
MSTRG.16896	8h_de.A5SS;4h_ABA.A5SS;	chrA08	NA	NA	NA	NA	NA	NA	NA
MSTRG.8659	8h_de.A5SS;4h_cold.A5SS;	chrA04	BnaA04g15300D	AT2G25970	KH domain-containing protein	F17H15.1	NA	NA	NA
MSTRG.30349	8h_de.A5SS;4h_cold.A5SS;	chrC02	NA	NA	NA	NA	NA	NA	NA
MSTRG.26009	8h_de.A5SS;8h_de.RI;4h_cold.A5SS;	chrAnn_random	BnaAnng39360D	AT5G11200	DEAD/DEAH box RNA helicase family protein	UAP56b	NA	NA	yes
MSTRG.46899	8h_de.RI;24h_ABA.RI;	chrC08	BnaC08g21130D	AT3G49430	SER/ARG-rich protein 34A	SR34a	NA	NA	yes
MSTRG.37961	8h_de.RI;4h_cold.SE;4h_cold.A5SS;4h_cold.RI;	chrC05	BnaC05g00840D	AT1G01060	Homeodomain-like superfamily protein	LHY	DRASTIC-COLD, RARGE-COLD	MYB_related	NA
MSTRG.29661	8h_de.RI;4h_NaCl.RI;	chrC02	BnaC02g22410D	AT2G37220	RNA-binding (RRM/RBD/RNP motifs) family protein	F3G5.1	NA	NA	yes
MSTRG.53022	8h_de.SE;24h_cold.SE;	chrCnn_random	BnaCnng34030D	AT5G19140	Aluminium induced protein with YGL and LRDR motifs	AILP1	NA	NA	NA
MSTRG.42815	8h_de.SE;24h_cold.SE;	chrC06	BnaC06g38570D	AT1G78070	Transducin/WD40 repeat-like superfamily protein	F28K19.28	DRASTIC-COLD, DRASTIC-DROUGHT, DRASTIC-NACL, RARGE-ABA, RARGE-DROUGHT, RARGE-LIGHT, RARGE-NACL	NA	NA
MSTRG.27308	8h_de.SE;24h_NaCl.SE;	chrC01	BnaC01g19150D	AT4G27000	RNA-binding (RRM/RBD/RNP motifs) family protein	ATRBP45C	RARGE-ABA	NA	yes
MSTRG.9539	8h_de.SE;4h_NaCl.SE;	chrA05	BnaA05g01280D	AT2G46550	transmembrane protein;(source:Araport11)	F13A10.8	NA	NA	NA
