# Supplementary material for: Differential alternative splicing genes and isoform co-expression networks of Brassica napus under multiple abiotic stresses
Source: Front Plant Sci. 2022 Oct 13;13:1009998. doi: 10.3389/fpls.2022.1009998 (PMC9608124; doi:10.3389/fpls.2022.1009998)
Supplement: Supplementary file 10 [file Table_4.xlsx]

## Sheet: Sheet1
Table S4 GO enrichment analysis of 357 DAS genes under different abiotic stresses
Class	GO_Name	GO_ID	GO_Level	P_value	EnrichmentScore	HitsGenesCountsInSelectedSet	HitsGenesCountsInBackground	AllGenesCountsInSelectedSet	AllGenesCountsInBackground	GenesOfSelectedSetInGOterm	corrected p-value(BH method)
Molecular function	RNA binding	GO:0003723	5	1.0254e-12	3.95763	37	2147	234	53738	BnaA09g40730D,BnaC02g37960D,BnaC03g71240D,BnaC08g21130D,BnaC05g06630D,BnaC06g33750D,BnaA06g34090D,BnaC01g26160D,BnaA05g14760D,BnaC03g70430D,BnaC07g28800D,BnaC01g41640D,BnaCnng07660D,BnaCnng52160D,BnaAnng39360D,BnaC07g06720D,BnaA08g15370D,BnaA01g05410D,BnaC03g60490D,BnaA10g21260D,BnaA04g15300D,BnaC06g40580D,BnaC02g22410D,BnaA06g36130D,BnaC08g39860D,BnaA01g14750D,BnaC03g68530D,BnaCnng37910D,BnaC03g…	4.24516e-10
Molecular function	nucleic acid binding	GO:0003676	4	6.7315e-09	1.82349	83	10453	234	53738	BnaA09g40730D,BnaC09g48780D,BnaA07g37700D,BnaC01g08450D,BnaA09g27250D,BnaC02g37960D,BnaA08g29480D,BnaC03g34750D,BnaC03g71240D,BnaC08g21130D,BnaC09g35120D,BnaA07g14310D,BnaAnng02600D,BnaC01g06900D,BnaA02g20560D,BnaC02g43420D,BnaC05g00840D,BnaC03g32450D,BnaC05g06630D,BnaC06g33750D,BnaA06g34090D,BnaA03g21690D,BnaCnng03510D,BnaC07g21340D,BnaC01g26160D,BnaC09g43350D,BnaA05g14760D,BnaA01g34790D,BnaA09g…	1.39342e-06
Molecular function	RNA helicase activity	GO:0003724	5	5.58428e-07	20.2632	6	68	234	53738	BnaC03g32450D,BnaA03g21690D,BnaCnng05570D,BnaAnng39360D,BnaA10g21260D,BnaA02g00870D,	7.7063e-05
Molecular function	ATP-dependent activity, acting on RNA	GO:0008186	3	5.58428e-07	20.2632	6	68	234	53738	BnaC03g32450D,BnaA03g21690D,BnaCnng05570D,BnaAnng39360D,BnaA10g21260D,BnaA02g00870D,	7.7063e-05
Molecular function	double-stranded DNA binding	GO:0003690	6	6.15329e-05	5.28605	9	391	234	53738	BnaA02g20560D,BnaC05g00840D,BnaA09g55690D,BnaCnng07660D,BnaC03g00040D,BnaAnng39360D,BnaA10g00780D,BnaA10g21260D,BnaA02g00870D,	0.00509493
Molecular function	heterocyclic compound binding	GO:1901363	3	0.000111886	1.29769	124	21944	234	53738	BnaA09g40730D,BnaC01g43240D,BnaC09g48780D,BnaA07g37700D,BnaC01g08450D,BnaA09g27250D,BnaC02g37960D,BnaA08g29480D,BnaC04g10230D,BnaC03g34750D,BnaAnng08090D,BnaA03g50200D,BnaC03g71240D,BnaC08g21130D,BnaC09g35120D,BnaA07g14310D,BnaAnng02600D,BnaC01g06900D,BnaA02g20560D,BnaA07g31020D,BnaC02g43420D,BnaC05g00840D,BnaA04g01660D,BnaA03g25050D,BnaC03g32450D,BnaC05g06630D,BnaC06g33750D,BnaA06g34090D,BnaA10g…	0.00772015
Molecular function	organic cyclic compound binding	GO:0097159	3	0.00012638	1.29457	124	21997	234	53738	BnaA09g40730D,BnaC01g43240D,BnaC09g48780D,BnaA07g37700D,BnaC01g08450D,BnaA09g27250D,BnaC02g37960D,BnaA08g29480D,BnaC04g10230D,BnaC03g34750D,BnaAnng08090D,BnaA03g50200D,BnaC03g71240D,BnaC08g21130D,BnaC09g35120D,BnaA07g14310D,BnaAnng02600D,BnaC01g06900D,BnaA02g20560D,BnaA07g31020D,BnaC02g43420D,BnaC05g00840D,BnaA04g01660D,BnaA03g25050D,BnaC03g32450D,BnaC05g06630D,BnaC06g33750D,BnaA06g34090D,BnaA10g…	0.00747448
Molecular function	chromatin binding	GO:0003682	3	0.000373312	3.07778	13	970	234	53738	BnaC09g35120D,BnaA06g18830D,BnaA09g23850D,BnaA05g01050D,BnaC04g26840D,BnaA03g41520D,BnaA10g12770D,BnaA04g04510D,BnaC01g38060D,BnaAnng41910D,BnaC09g54190D,BnaC06g12130D,BnaC06g21540D,	0.0193189
Cellular component	intracellular anatomical structure	GO:0005622	3	0.000103486	1.0922	259	58798	283	70170	BnaA09g40730D,BnaC09g20000D,BnaC03g51470D,BnaA09g00480D,BnaC05g12690D,BnaC09g48780D,BnaC04g21400D,BnaC07g09890D,BnaA04g20700D,BnaA07g37700D,BnaA06g09860D,BnaC01g08450D,BnaA09g27250D,BnaA03g21950D,BnaC02g37960D,BnaC01g04730D,BnaA08g29480D,BnaC04g10230D,BnaC02g37460D,BnaC03g34750D,BnaUnng01270D,BnaAnng08090D,BnaA05g33830D,BnaA03g50200D,BnaA10g04470D,BnaC03g27690D,BnaC03g71240D,BnaCnng34030D,BnaC03g…	0.0203868
Cellular component	nucleus	GO:0005634	6	0.000407674	1.24516	144	28675	283	70170	BnaC03g51470D,BnaA09g00480D,BnaA07g37700D,BnaA06g09860D,BnaC01g08450D,BnaA09g27250D,BnaC02g37960D,BnaC01g04730D,BnaA08g29480D,BnaC03g34750D,BnaC03g27690D,BnaC03g71240D,BnaC03g05100D,BnaC08g21130D,BnaC09g35120D,BnaA07g14310D,BnaC01g43970D,BnaAnng02600D,BnaC01g06900D,BnaC05g04010D,BnaC04g49710D,BnaA09g06910D,BnaA06g18830D,BnaA02g20560D,BnaCnng31740D,BnaA08g12390D,BnaA08g26070D,BnaA07g31020D,BnaC02g…	0.0267706
Cellular component	intracellular membrane-bounded organelle	GO:0043231	5	0.000739522	1.11336	230	51222	283	70170	BnaC03g51470D,BnaA09g00480D,BnaC09g48780D,BnaC04g21400D,BnaC07g09890D,BnaA04g20700D,BnaA07g37700D,BnaA06g09860D,BnaC01g08450D,BnaA09g27250D,BnaA03g21950D,BnaC02g37960D,BnaC01g04730D,BnaA08g29480D,BnaC04g10230D,BnaC02g37460D,BnaC03g34750D,BnaA05g33830D,BnaA03g50200D,BnaA10g04470D,BnaC03g27690D,BnaC03g71240D,BnaC03g05100D,BnaC08g21130D,BnaC09g35120D,BnaA07g14310D,BnaC08g13980D,BnaAnng19630D,BnaC01g…	0.0364215
Cellular component	plastid membrane	GO:0042170	5	0.000744817	2.52367	16	1572	283	70170	BnaC02g37460D,BnaA05g33830D,BnaC05g37150D,BnaC03g75710D,BnaA03g41190D,BnaC03g53420D,BnaA09g05120D,BnaA06g32810D,BnaCnng05580D,BnaC01g00600D,BnaC07g23660D,BnaC02g22410D,BnaC06g33790D,BnaCnng45490D,BnaA01g20900D,BnaC03g26840D,	0.0293458
Cellular component	membrane-bounded organelle	GO:0043227	4	0.000776297	1.11278	230	51249	283	70170	BnaC03g51470D,BnaA09g00480D,BnaC09g48780D,BnaC04g21400D,BnaC07g09890D,BnaA04g20700D,BnaA07g37700D,BnaA06g09860D,BnaC01g08450D,BnaA09g27250D,BnaA03g21950D,BnaC02g37960D,BnaC01g04730D,BnaA08g29480D,BnaC04g10230D,BnaC02g37460D,BnaC03g34750D,BnaA05g33830D,BnaA03g50200D,BnaA10g04470D,BnaC03g27690D,BnaC03g71240D,BnaC03g05100D,BnaC08g21130D,BnaC09g35120D,BnaA07g14310D,BnaC08g13980D,BnaAnng19630D,BnaC01g…	0.0254884
Cellular component	plastid envelope	GO:0009526	5	0.000803337	1.97873	26	3258	283	70170	BnaC02g37460D,BnaA05g33830D,BnaC05g37150D,BnaC03g75710D,BnaA03g41190D,BnaC03g53420D,BnaA09g05120D,BnaA06g32810D,BnaC09g49480D,BnaA04g29090D,BnaA03g21690D,BnaCnng05580D,BnaC01g00600D,BnaC05g15760D,BnaC07g28800D,BnaC09g54280D,BnaC07g23660D,BnaC02g22410D,BnaC06g33790D,BnaAnng15970D,BnaAnng37730D,BnaCnng45490D,BnaC02g30140D,BnaA01g20900D,BnaC03g26840D,BnaC08g16710D,	0.0226082
Cellular component	thylakoid membrane	GO:0042651	5	0.000807358	2.70984	14	1281	283	70170	BnaC02g37460D,BnaA05g33830D,BnaC05g37150D,BnaC03g53420D,BnaA09g05120D,BnaA06g32810D,BnaCnng05580D,BnaC01g00600D,BnaC07g23660D,BnaC02g22410D,BnaC06g33790D,BnaCnng45490D,BnaC06g31900D,BnaA01g20900D,	0.0198812
Cellular component	thylakoid	GO:0009579	4	0.000821476	2.3453	18	1903	283	70170	BnaC02g37460D,BnaA05g33830D,BnaC05g37150D,BnaC03g53420D,BnaA09g05120D,BnaA06g32810D,BnaCnng05580D,BnaC01g00600D,BnaC09g47290D,BnaC07g23660D,BnaC03g39300D,BnaC02g22410D,BnaC06g33790D,BnaAnng37730D,BnaCnng45490D,BnaC06g31900D,BnaA01g20900D,BnaC04g41100D,	0.0179812
Cellular component	photosynthetic membrane	GO:0034357	4	0.000895225	2.68055	14	1295	283	70170	BnaC02g37460D,BnaA05g33830D,BnaC05g37150D,BnaC03g53420D,BnaA09g05120D,BnaA06g32810D,BnaCnng05580D,BnaC01g00600D,BnaC07g23660D,BnaC02g22410D,BnaC06g33790D,BnaCnng45490D,BnaC06g31900D,BnaA01g20900D,	0.0176359
Cellular component	chloroplast thylakoid membrane	GO:0009535	7	0.00135869	2.67943	13	1203	283	70170	BnaC02g37460D,BnaA05g33830D,BnaC05g37150D,BnaC03g53420D,BnaA09g05120D,BnaA06g32810D,BnaCnng05580D,BnaC01g00600D,BnaC07g23660D,BnaC02g22410D,BnaC06g33790D,BnaCnng45490D,BnaA01g20900D,	0.0223052
Cellular component	plastid thylakoid membrane	GO:0055035	6	0.00148267	2.65297	13	1215	283	70170	BnaC02g37460D,BnaA05g33830D,BnaC05g37150D,BnaC03g53420D,BnaA09g05120D,BnaA06g32810D,BnaCnng05580D,BnaC01g00600D,BnaC07g23660D,BnaC02g22410D,BnaC06g33790D,BnaCnng45490D,BnaA01g20900D,	0.0224681
Cellular component	nuclear body	GO:0016604	3	0.00189065	5.76629	5	215	283	70170	BnaC05g06630D,BnaC03g70430D,BnaC01g41640D,BnaA01g14750D,BnaC04g07710D,	0.0266042
Cellular component	plastid thylakoid	GO:0031976	5	0.00191146	2.37956	15	1563	283	70170	BnaC02g37460D,BnaA05g33830D,BnaC05g37150D,BnaC03g53420D,BnaA09g05120D,BnaA06g32810D,BnaCnng05580D,BnaC01g00600D,BnaC09g47290D,BnaC07g23660D,BnaC02g22410D,BnaC06g33790D,BnaCnng45490D,BnaA01g20900D,BnaC04g41100D,	0.0251039
Cellular component	chloroplast thylakoid	GO:0009534	6	0.00191146	2.37956	15	1563	283	70170	BnaC02g37460D,BnaA05g33830D,BnaC05g37150D,BnaC03g53420D,BnaA09g05120D,BnaA06g32810D,BnaCnng05580D,BnaC01g00600D,BnaC09g47290D,BnaC07g23660D,BnaC02g22410D,BnaC06g33790D,BnaCnng45490D,BnaA01g20900D,BnaC04g41100D,	0.0251039
Cellular component	intracellular organelle	GO:0043229	4	0.00287322	1.09641	230	52014	283	70170	BnaC03g51470D,BnaA09g00480D,BnaC09g48780D,BnaC04g21400D,BnaC07g09890D,BnaA04g20700D,BnaA07g37700D,BnaA06g09860D,BnaC01g08450D,BnaA09g27250D,BnaA03g21950D,BnaC02g37960D,BnaC01g04730D,BnaA08g29480D,BnaC04g10230D,BnaC02g37460D,BnaC03g34750D,BnaA05g33830D,BnaA03g50200D,BnaA10g04470D,BnaC03g27690D,BnaC03g71240D,BnaC03g05100D,BnaC08g21130D,BnaC09g35120D,BnaA07g14310D,BnaC08g13980D,BnaAnng19630D,BnaC01g…	0.0314459
Cellular component	organelle	GO:0043226	3	0.00300194	1.09584	230	52041	283	70170	BnaC03g51470D,BnaA09g00480D,BnaC09g48780D,BnaC04g21400D,BnaC07g09890D,BnaA04g20700D,BnaA07g37700D,BnaA06g09860D,BnaC01g08450D,BnaA09g27250D,BnaA03g21950D,BnaC02g37960D,BnaC01g04730D,BnaA08g29480D,BnaC04g10230D,BnaC02g37460D,BnaC03g34750D,BnaA05g33830D,BnaA03g50200D,BnaA10g04470D,BnaC03g27690D,BnaC03g71240D,BnaC03g05100D,BnaC08g21130D,BnaC09g35120D,BnaA07g14310D,BnaC08g13980D,BnaAnng19630D,BnaC01g…	0.0311254
Cellular component	nucleoplasm	GO:0005654	3	0.00446421	3.47131	7	500	283	70170	BnaC05g06630D,BnaC03g70430D,BnaC01g41640D,BnaCnng36650D,BnaA01g14750D,BnaC04g07710D,BnaC07g38900D,	0.0418785
Cellular component	nuclear lumen	GO:0031981	6	0.00529871	1.96873	18	2267	283	70170	BnaC08g21130D,BnaC05g06630D,BnaA03g21690D,BnaC01g26160D,BnaC03g70430D,BnaA09g55690D,BnaC01g41640D,BnaCnng07660D,BnaC08g26270D,BnaAnng39360D,BnaA01g05410D,BnaC03g60490D,BnaC06g40580D,BnaCnng36650D,BnaA01g14750D,BnaA02g00870D,BnaC04g07710D,BnaC07g38900D,	0.0434936
Cellular component	chloroplast	GO:0009507	7	0.00616733	1.31558	74	13947	283	70170	BnaA04g20700D,BnaA03g21950D,BnaC01g04730D,BnaC02g37460D,BnaA05g33830D,BnaA03g50200D,BnaA10g04470D,BnaC08g13980D,BnaC05g37150D,BnaA04g02520D,BnaC03g53380D,BnaC03g75710D,BnaA03g41190D,BnaA06g31670D,BnaC03g53420D,BnaA09g05120D,BnaA06g32810D,BnaC09g49480D,BnaA03g25050D,BnaA02g05150D,BnaA04g29090D,BnaA03g21690D,BnaC01g28660D,BnaC09g43350D,BnaCnng05580D,BnaA06g15090D,BnaA06g13890D,BnaA08g23890D,BnaC01g…	0.0485986
Cellular component	organelle envelope	GO:0031967	4	0.00621893	1.62626	30	4574	283	70170	BnaC02g37460D,BnaA05g33830D,BnaC05g37150D,BnaC03g75710D,BnaA03g41190D,BnaC03g53420D,BnaA09g05120D,BnaA06g32810D,BnaC09g49480D,BnaC06g33750D,BnaA04g29090D,BnaA03g21690D,BnaCnng05580D,BnaC01g00600D,BnaC05g15760D,BnaC09g47290D,BnaC07g28800D,BnaC09g54280D,BnaC07g23660D,BnaC02g22410D,BnaCnng17350D,BnaA07g26340D,BnaC06g33790D,BnaAnng15970D,BnaAnng37730D,BnaCnng45490D,BnaC02g30140D,BnaA01g20900D,BnaC03g…	0.0471203
Cellular component	envelope	GO:0031975	3	0.00710087	1.61042	30	4619	283	70170	BnaC02g37460D,BnaA05g33830D,BnaC05g37150D,BnaC03g75710D,BnaA03g41190D,BnaC03g53420D,BnaA09g05120D,BnaA06g32810D,BnaC09g49480D,BnaC06g33750D,BnaA04g29090D,BnaA03g21690D,BnaCnng05580D,BnaC01g00600D,BnaC05g15760D,BnaC09g47290D,BnaC07g28800D,BnaC09g54280D,BnaC07g23660D,BnaC02g22410D,BnaCnng17350D,BnaA07g26340D,BnaC06g33790D,BnaAnng15970D,BnaAnng37730D,BnaCnng45490D,BnaC02g30140D,BnaA01g20900D,BnaC03g…	0.0499597
Biological process	mRNA metabolic process	GO:0016071	8	9.30289e-12	4.64891	29	1482	252	59869	BnaA07g37700D,BnaC01g04730D,BnaC09g49480D,BnaC05g06630D,BnaA06g34090D,BnaA10g21460D,BnaA02g05150D,BnaC01g28660D,BnaC09g43350D,BnaC03g70430D,BnaC01g41640D,BnaC05g50020D,BnaCnng52160D,BnaC09g21600D,BnaC02g27110D,BnaA08g15370D,BnaA01g05410D,BnaC03g60490D,BnaC06g40580D,BnaA06g25320D,BnaA09g19610D,BnaA01g14750D,BnaCnng37910D,BnaA01g25610D,BnaC09g07820D,BnaA08g14210D,BnaC01g19150D,BnaA03g05160D,BnaA01g…	1.36753e-08
Biological process	mRNA splicing, via spliceosome	GO:0000398	12	1.40177e-09	7.79788	15	457	252	59869	BnaA07g37700D,BnaC05g06630D,BnaC03g70430D,BnaC01g41640D,BnaCnng52160D,BnaA08g15370D,BnaA01g05410D,BnaC03g60490D,BnaC06g40580D,BnaA01g14750D,BnaCnng37910D,BnaC09g07820D,BnaA08g14210D,BnaC01g19150D,BnaA01g16060D,	1.0303e-06
Biological process	mRNA processing	GO:0006397	9	2.93431e-09	6.2714	17	644	252	59869	BnaA07g37700D,BnaC05g06630D,BnaA06g34090D,BnaC03g70430D,BnaC01g41640D,BnaCnng52160D,BnaA08g15370D,BnaA01g05410D,BnaC03g60490D,BnaC06g40580D,BnaA01g14750D,BnaCnng37910D,BnaA01g25610D,BnaC09g07820D,BnaA08g14210D,BnaC01g19150D,BnaA01g16060D,	1.43781e-06
Biological process	RNA splicing, via transesterification reactions	GO:0000375	10	2.95557e-09	7.37812	15	483	252	59869	BnaA07g37700D,BnaC05g06630D,BnaC03g70430D,BnaC01g41640D,BnaCnng52160D,BnaA08g15370D,BnaA01g05410D,BnaC03g60490D,BnaC06g40580D,BnaA01g14750D,BnaCnng37910D,BnaC09g07820D,BnaA08g14210D,BnaC01g19150D,BnaA01g16060D,	1.08617e-06
Biological process	RNA splicing, via transesterification reactions with bulged adenosine as nucleophile	GO:0000377	11	2.95557e-09	7.37812	15	483	252	59869	BnaA07g37700D,BnaC05g06630D,BnaC03g70430D,BnaC01g41640D,BnaCnng52160D,BnaA08g15370D,BnaA01g05410D,BnaC03g60490D,BnaC06g40580D,BnaA01g14750D,BnaCnng37910D,BnaC09g07820D,BnaA08g14210D,BnaC01g19150D,BnaA01g16060D,	1.08617e-06
Biological process	RNA splicing	GO:0008380	9	4.65314e-09	4.56876	22	1144	252	59869	BnaA07g37700D,BnaC03g71240D,BnaC08g21130D,BnaA08g12390D,BnaC05g06630D,BnaC01g26160D,BnaC07g11580D,BnaC03g70430D,BnaC01g41640D,BnaCnng52160D,BnaA08g15370D,BnaA01g05410D,BnaC03g60490D,BnaC06g40580D,BnaCnng36650D,BnaA01g14750D,BnaCnng37910D,BnaC09g07820D,BnaA08g14210D,BnaC01g19150D,BnaC07g38900D,BnaA01g16060D,	1.14002e-06
Biological process	photoperiodism, flowering	GO:0048573	7	3.37508e-07	5.12753	15	695	252	59869	BnaA08g29480D,BnaA07g14310D,BnaA07g31020D,BnaC02g43420D,BnaC05g00840D,BnaC03g05550D,BnaC06g34470D,BnaC03g25720D,BnaC05g50020D,BnaA05g01050D,BnaC03g00040D,BnaA10g00780D,BnaA04g15260D,BnaC01g39760D,BnaC06g12130D,	7.08767e-05
Biological process	photoperiodism	GO:0009648	6	5.25377e-07	4.94949	15	720	252	59869	BnaA08g29480D,BnaA07g14310D,BnaA07g31020D,BnaC02g43420D,BnaC05g00840D,BnaC03g05550D,BnaC06g34470D,BnaC03g25720D,BnaC05g50020D,BnaA05g01050D,BnaC03g00040D,BnaA10g00780D,BnaA04g15260D,BnaC01g39760D,BnaC06g12130D,	9.65381e-05
Biological process	long-day photoperiodism, flowering	GO:0048574	8	9.08552e-06	12.6146	6	113	252	59869	BnaC05g00840D,BnaA05g01050D,BnaC03g00040D,BnaA10g00780D,BnaC01g39760D,BnaC06g12130D,	0.00133557
Biological process	RNA processing	GO:0006396	8	1.1393e-05	2.25806	33	3472	252	59869	BnaA07g37700D,BnaA05g33830D,BnaC03g71240D,BnaC08g21130D,BnaA06g18830D,BnaA02g20560D,BnaA03g41190D,BnaA08g12390D,BnaC05g06630D,BnaA06g34090D,BnaC01g26160D,BnaC07g11580D,BnaC03g70430D,BnaC01g41640D,BnaC09g54280D,BnaC05g50020D,BnaCnng52160D,BnaC07g06720D,BnaA08g15370D,BnaA01g05410D,BnaC03g60490D,BnaC06g40580D,BnaCnng36650D,BnaCnng03930D,BnaA01g14750D,BnaCnng37910D,BnaC03g74530D,BnaA01g25610D,BnaC09g…	0.00152252
Biological process	long-day photoperiodism	GO:0048571	7	1.16435e-05	12.0801	6	118	252	59869	BnaC05g00840D,BnaA05g01050D,BnaC03g00040D,BnaA10g00780D,BnaC01g39760D,BnaC06g12130D,	0.00142633
Biological process	vegetative to reproductive phase transition of meristem	GO:0010228	4	1.37247e-05	2.75138	23	1986	252	59869	BnaA09g27250D,BnaA08g29480D,BnaA07g14310D,BnaA06g18830D,BnaA02g20560D,BnaA07g31020D,BnaC02g43420D,BnaC05g00840D,BnaC06g33750D,BnaC03g05550D,BnaC06g34470D,BnaC03g25720D,BnaC05g50020D,BnaA05g01050D,BnaC03g00040D,BnaC02g27110D,BnaA10g00780D,BnaA04g15260D,BnaC01g39760D,BnaC05g36590D,BnaC06g12130D,BnaA07g25760D,BnaA03g05160D,	0.00155195
Biological process	RNA metabolic process	GO:0016070	7	0.000100214	1.46508	82	13297	252	59869	BnaA07g37700D,BnaC01g08450D,BnaA09g27250D,BnaC01g04730D,BnaA05g33830D,BnaC03g71240D,BnaC08g21130D,BnaC09g35120D,BnaC01g06900D,BnaA06g18830D,BnaA02g20560D,BnaA03g41190D,BnaA08g12390D,BnaC02g43420D,BnaC05g00840D,BnaC09g49480D,BnaC05g06630D,BnaA06g34090D,BnaA10g21460D,BnaA02g05150D,BnaCnng03510D,BnaC07g21340D,BnaC01g26160D,BnaC01g28660D,BnaC09g43350D,BnaA01g34790D,BnaC07g11580D,BnaA09g23850D,BnaC03g…	0.0105224
Biological process	regulation of gene expression	GO:0010468	6	0.000315089	1.50937	65	10231	252	59869	BnaA07g37700D,BnaC01g08450D,BnaA09g27250D,BnaA05g33830D,BnaC09g35120D,BnaC01g06900D,BnaA06g18830D,BnaA02g20560D,BnaA08g12390D,BnaC02g43420D,BnaC05g00840D,BnaA07g16360D,BnaC09g49480D,BnaC05g06630D,BnaA10g21460D,BnaCnng03510D,BnaC07g21340D,BnaC09g43350D,BnaA01g34790D,BnaC07g11580D,BnaA09g23850D,BnaC03g70430D,BnaC09g18620D,BnaC02g27330D,BnaC05g50020D,BnaA04g18330D,BnaA05g01050D,BnaCnng07660D,BnaC03g…	0.0289488
Biological process	nucleic acid metabolic process	GO:0090304	6	0.000349409	1.37956	90	15499	252	59869	BnaA07g37700D,BnaC01g08450D,BnaA09g27250D,BnaC01g04730D,BnaA05g33830D,BnaC03g71240D,BnaC08g21130D,BnaC09g35120D,BnaC01g06900D,BnaA06g18830D,BnaA02g20560D,BnaA03g41190D,BnaA08g12390D,BnaC02g43420D,BnaC05g00840D,BnaA07g16360D,BnaC09g49480D,BnaC05g06630D,BnaA06g34090D,BnaA10g21460D,BnaA02g05150D,BnaC03g05550D,BnaCnng03510D,BnaC07g21340D,BnaC01g26160D,BnaC01g28660D,BnaC09g43350D,BnaA01g34790D,BnaC07g…	0.0302136
Biological process	regulation of RNA metabolic process	GO:0051252	7	0.000425389	1.57547	54	8143	252	59869	BnaA07g37700D,BnaC01g08450D,BnaA09g27250D,BnaA05g33830D,BnaC09g35120D,BnaC01g06900D,BnaA06g18830D,BnaA02g20560D,BnaA08g12390D,BnaC02g43420D,BnaC05g00840D,BnaC05g06630D,BnaCnng03510D,BnaC07g21340D,BnaC09g43350D,BnaA01g34790D,BnaC07g11580D,BnaA09g23850D,BnaC03g70430D,BnaC09g18620D,BnaA04g18330D,BnaA05g01050D,BnaCnng07660D,BnaC03g05640D,BnaC03g00040D,BnaC05g50970D,BnaC02g27110D,BnaA10g00780D,BnaA03g…	0.0329117
Biological process	organic cyclic compound metabolic process	GO:1901360	4	0.000447527	1.28519	118	21813	252	59869	BnaA07g37700D,BnaC01g08450D,BnaA09g27250D,BnaA03g21950D,BnaC01g04730D,BnaA05g33830D,BnaC03g71240D,BnaC08g21130D,BnaC09g35120D,BnaA08g18350D,BnaC01g06900D,BnaC02g45340D,BnaA06g18830D,BnaA02g20560D,BnaA04g02520D,BnaA03g41190D,BnaA08g12390D,BnaC02g43420D,BnaC05g00840D,BnaA06g14020D,BnaA07g16360D,BnaA06g32810D,BnaC09g49480D,BnaC05g06630D,BnaA06g34090D,BnaA10g21460D,BnaA02g05150D,BnaC05g18760D,BnaA04g…	0.0328932
Biological process	nucleobase-containing compound metabolic process	GO:0006139	5	0.00046559	1.32804	102	18247	252	59869	BnaA07g37700D,BnaC01g08450D,BnaA09g27250D,BnaC01g04730D,BnaA05g33830D,BnaC03g71240D,BnaC08g21130D,BnaC09g35120D,BnaA08g18350D,BnaC01g06900D,BnaA06g18830D,BnaA02g20560D,BnaA04g02520D,BnaA03g41190D,BnaA08g12390D,BnaC02g43420D,BnaC05g00840D,BnaA07g16360D,BnaC09g49480D,BnaC05g06630D,BnaA06g34090D,BnaA10g21460D,BnaA02g05150D,BnaA04g29090D,BnaC03g05550D,BnaCnng03510D,BnaC07g21340D,BnaC01g26160D,BnaC01g…	0.0325913
Biological process	regulation of nucleobase-containing compound metabolic process	GO:0019219	6	0.000551447	1.53431	57	8826	252	59869	BnaA07g37700D,BnaC01g08450D,BnaA09g27250D,BnaA05g33830D,BnaC09g35120D,BnaC01g06900D,BnaA06g18830D,BnaA02g20560D,BnaA08g12390D,BnaC02g43420D,BnaC05g00840D,BnaC05g06630D,BnaCnng03510D,BnaC07g21340D,BnaC09g43350D,BnaA01g34790D,BnaC07g11580D,BnaA09g23850D,BnaC03g70430D,BnaC09g18620D,BnaC02g27330D,BnaA09g55690D,BnaA04g18330D,BnaA05g01050D,BnaCnng07660D,BnaC03g05640D,BnaC03g00040D,BnaC05g50970D,BnaC02g…	0.0352447
Biological process	obsolete ATP catabolic process	GO:0006200	0	0.000795655	3.18699	11	820	252	59869	BnaA03g50200D,BnaA02g20560D,BnaC03g32450D,BnaC02g01960D,BnaA04g05540D,BnaA09g55690D,BnaC04g28280D,BnaCnng05570D,BnaC07g06720D,BnaCnng29600D,BnaA08g02230D,	0.0467845
Biological process	cellular aromatic compound metabolic process	GO:0006725	4	0.000819342	1.27681	114	21212	252	59869	BnaA07g37700D,BnaC01g08450D,BnaA09g27250D,BnaA03g21950D,BnaC01g04730D,BnaA05g33830D,BnaC03g71240D,BnaC08g21130D,BnaC09g35120D,BnaA08g18350D,BnaC01g06900D,BnaA06g18830D,BnaA02g20560D,BnaA04g02520D,BnaA03g41190D,BnaA08g12390D,BnaC02g43420D,BnaC05g00840D,BnaA07g16360D,BnaA06g32810D,BnaC09g49480D,BnaC05g06630D,BnaA06g34090D,BnaA10g21460D,BnaA02g05150D,BnaC05g18760D,BnaA04g29090D,BnaC03g05550D,BnaCnng…	0.0446086
Biological process	regulation of cellular biosynthetic process	GO:0031326	6	0.000884582	1.51991	55	8597	252	59869	BnaA07g37700D,BnaC01g08450D,BnaA09g27250D,BnaA05g33830D,BnaC09g35120D,BnaC01g06900D,BnaA06g18830D,BnaA02g20560D,BnaA08g12390D,BnaC02g43420D,BnaC05g00840D,BnaA06g14020D,BnaCnng03510D,BnaC07g21340D,BnaC09g43350D,BnaC01g15010D,BnaA01g34790D,BnaC07g11580D,BnaA09g23850D,BnaC03g70430D,BnaC09g18620D,BnaA04g18330D,BnaA05g01050D,BnaCnng07660D,BnaC03g05640D,BnaC03g00040D,BnaC05g50970D,BnaC02g27110D,BnaA10g…	0.0464406
Biological process	gene expression	GO:0010467	5	0.000887123	1.35703	86	15056	252	59869	BnaC09g48780D,BnaA07g37700D,BnaC01g08450D,BnaA09g27250D,BnaA05g33830D,BnaC03g71240D,BnaC08g21130D,BnaC09g35120D,BnaC01g06900D,BnaA06g18830D,BnaA02g20560D,BnaA04g02520D,BnaA03g41190D,BnaA08g12390D,BnaC02g43420D,BnaC05g00840D,BnaA07g16360D,BnaC09g49480D,BnaC05g06630D,BnaC06g33750D,BnaA06g34090D,BnaA10g21460D,BnaCnng03510D,BnaC07g21340D,BnaC01g26160D,BnaC09g43350D,BnaA01g34790D,BnaC07g11580D,BnaA09g…	0.044968
Biological process	regulation of transcription, DNA-templated	GO:0006355	10	0.000966774	1.53809	52	8032	252	59869	BnaA07g37700D,BnaC01g08450D,BnaA09g27250D,BnaA05g33830D,BnaC09g35120D,BnaC01g06900D,BnaA06g18830D,BnaA02g20560D,BnaA08g12390D,BnaC02g43420D,BnaC05g00840D,BnaCnng03510D,BnaC07g21340D,BnaC09g43350D,BnaA01g34790D,BnaC07g11580D,BnaA09g23850D,BnaC03g70430D,BnaC09g18620D,BnaA04g18330D,BnaA05g01050D,BnaCnng07660D,BnaC03g05640D,BnaC03g00040D,BnaC05g50970D,BnaC02g27110D,BnaA10g00780D,BnaA03g41520D,BnaA10g…	0.0473719
Biological process	regulation of nucleic acid-templated transcription	GO:1903506	9	0.000966774	1.53809	52	8032	252	59869	BnaA07g37700D,BnaC01g08450D,BnaA09g27250D,BnaA05g33830D,BnaC09g35120D,BnaC01g06900D,BnaA06g18830D,BnaA02g20560D,BnaA08g12390D,BnaC02g43420D,BnaC05g00840D,BnaCnng03510D,BnaC07g21340D,BnaC09g43350D,BnaA01g34790D,BnaC07g11580D,BnaA09g23850D,BnaC03g70430D,BnaC09g18620D,BnaA04g18330D,BnaA05g01050D,BnaCnng07660D,BnaC03g05640D,BnaC03g00040D,BnaC05g50970D,BnaC02g27110D,BnaA10g00780D,BnaA03g41520D,BnaA10g…	0.0473719
Biological process	regulation of RNA biosynthetic process	GO:2001141	8	0.000985944	1.53675	52	8039	252	59869	BnaA07g37700D,BnaC01g08450D,BnaA09g27250D,BnaA05g33830D,BnaC09g35120D,BnaC01g06900D,BnaA06g18830D,BnaA02g20560D,BnaA08g12390D,BnaC02g43420D,BnaC05g00840D,BnaCnng03510D,BnaC07g21340D,BnaC09g43350D,BnaA01g34790D,BnaC07g11580D,BnaA09g23850D,BnaC03g70430D,BnaC09g18620D,BnaA04g18330D,BnaA05g01050D,BnaCnng07660D,BnaC03g05640D,BnaC03g00040D,BnaC05g50970D,BnaC02g27110D,BnaA10g00780D,BnaA03g41520D,BnaA10g…	0.0452918
