# Supplementary material for: Differential alternative splicing genes and isoform co-expression networks of Brassica napus under multiple abiotic stresses
Source: Front Plant Sci. 2022 Oct 13;13:1009998. doi: 10.3389/fpls.2022.1009998 (PMC9608124; doi:10.3389/fpls.2022.1009998)
Supplement: Supplementary file 11 [file Table_5.xlsx]

## Sheet: Readme
Table S5 DAS genes whose isoforms were identified as hub isoforms in stress-related modules

## Sheet: dehydration-hub
Module	Module related trait__cor	Module_transcripst_number	Module_gene_number	AS_type	Transcript in the module	kME	kWithin	Chrome	Gene ID	Darmor ID	AT ID	Gene function	Gene name	Stress gene in Arabidopsis	RBPs	TF
blue	24h_cold__0.945039544297291	8200	7325	1h_de.A3SS;1h_de.A3SS;	BnaA01g20900D	0.933119	1986.22	chrA01	MSTRG.1305	BnaA01g20900D	AT3G49720	transmembrane protein;(source:Araport11)	AT3G49720	NA	NA	NA
blue	24h_cold__0.945039544297291	8200	7325	1h_de.A5SS;8h_de.A5SS;	MSTRG.45130.3	0.910275	1825.83	chrC07	MSTRG.45130	BnaC07g38900D	AT4G24440	transcription initiation factor IIA gamma chain / TFIIA-gamma (TFIIA-S)	T22A6.270	NA	NA	NA
blue	24h_cold__0.945039544297291	8200	7325	8h_de.A5SS;	MSTRG.36932.1	0.933959	2039.27	chrC04	MSTRG.36932	BnaC04g38240D	AT2G25970	KH domain-containing protein	F17H15.1	NA	NA	NA
blue	24h_cold__0.945039544297291	8200	7325	8h_de.SE;	MSTRG.27069.1	0.857093	1993.52	chrC01	MSTRG.27069	BnaC01g15010D	AT4G23450	RING/U-box superfamily protein	AIRP1	DRASTIC-COLD, DRASTIC-NACL	NA	NA
blue	24h_cold__0.945039544297291	8200	7325	8h_de.SE;	MSTRG.17416.2	0.893549	1980.94	chrA08	MSTRG.17416	BnaA08g14210D	AT4G27000	RNA-binding (RRM/RBD/RNP motifs) family protein	ATRBP45C	RARGE-ABA	yes	NA
brown	8h_de__0.679427694730839	3485	2887	1h_de.A5SS;8h_de.A5SS;	MSTRG.42567.2	0.834297	905.679	chrC06	MSTRG.42567	BnaC06g34510D	AT3G63500	Protein of unknown function (DUF1423)	TTA2	NA	NA	NA
brown	8h_de__0.679427694730839	3485	2887	8h_de.A3SS;8h_de.A5SS;	MSTRG.26862.1	0.892259	667.233	chrC01	MSTRG.26862	BnaC01g11070D	AT2G32120	heat-shock protein 70T-2	HSP70T-2	NA	NA	NA
brown	8h_de__0.679427694730839	3485	2887	8h_de.A3SS;8h_de.A5SS;	MSTRG.26862.2	0.83648	1055.44	chrC01	MSTRG.26862	BnaC01g11070D	AT2G32120	heat-shock protein 70T-2	HSP70T-2	NA	NA	NA
brown	8h_de__0.679427694730839	3485	2887	8h_de.A3SS;8h_de.A5SS;	MSTRG.26862.5	0.879215	664.821	chrC01	MSTRG.26862	BnaC01g11070D	AT2G32120	heat-shock protein 70T-2	HSP70T-2	NA	NA	NA
brown	8h_de__0.679427694730839	3485	2887	8h_de.A3SS;8h_de.RI;	MSTRG.50557.5	0.877544	871.485	chrC09	MSTRG.50557	BnaC09g41540D	AT4G11340	Disease resistance protein (TIR-NBS-LRR class) family	F8L21.130	NA	NA	NA
brown	8h_de__0.679427694730839	3485	2887	8h_de.A5SS;	MSTRG.17315.1	0.90408	758.101	chrA08	MSTRG.17315	BnaA08g12390D	AT4G31720	TBP-associated factor II 15	TAFII15	NA	NA	NA
brown	8h_de__0.679427694730839	3485	2887	8h_de.A5SS;	MSTRG.27626.1	0.893163	1332.43	chrC01	MSTRG.27626	BnaC01g25020D	AT1G36380	transmembrane protein;(source:Araport11)	F7F23.10	NA	NA	NA
brown	8h_de__0.679427694730839	3485	2887	8h_de.RI;	BnaC05g40320D	0.887798	717.855	chrC05	MSTRG.40144	BnaC05g40320D	AT3G13060	evolutionarily conserved C-terminal region 5	ECT5	NA	NA	NA
brown	8h_de__0.679427694730839	3485	2887	8h_de.SE;	MSTRG.15345.1	0.841475	1337.51	chrA07	MSTRG.15345	BnaA07g19200D	AT3G62140	NEFA-interacting nuclear protein;(source:Araport11)	AT3G62140	NA	NA	NA
brown	8h_de__0.679427694730839	3485	2887	8h_de.SE;	BnaC01g26150D	0.84791	778.328	chrC01	MSTRG.27677	BnaC01g26160D	AT3G49430	SER/ARG-rich protein 34A	SR34a	NA	yes	NA
brown	8h_de__0.679427694730839	3485	2887	8h_de.SE;8h_de.RI;	MSTRG.38409.2	0.887813	1047.67	chrC05	MSTRG.38409	BnaC05g08090D	AT1G10600	associated molecule with the SH3 domain of STAM 2	AMSH2	NA	NA	NA
green	4h_cold__0.986366400852756	2478	2003	1h_de.RI;	BnaA01g05410D	0.886247	525.247	chrA01	MSTRG.373	BnaA01g05410D	AT4G39260	cold, circadian rhythm, and RNA binding 1	CCR1	DRASTIC-NACL, RARGE-COLD	NA	NA
green	4h_cold__0.986366400852756	2478	2003	1h_de.RI;	MSTRG.16072.3	0.811578	482.554	chrA07	MSTRG.16072	BnaA07g31020D	AT1G73660	protein tyrosine kinase family protein	F25P22.8	NA	NA	NA
green	4h_cold__0.986366400852756	2478	2003	8h_de.A3SS;	BnaA04g18330D	0.961687	789.347	chrA04	MSTRG.8836	BnaA04g18330D	AT2G31380	salt tolerance homologue	STH	DRASTIC-COLD, RARGE-COLD, RARGE-LIGHT	NA	DBB
green	4h_cold__0.986366400852756	2478	2003	8h_de.A3SS;	MSTRG.8836.1	0.892173	747.595	chrA04	MSTRG.8836	BnaA04g18330D	AT2G31380	salt tolerance homologue	STH	DRASTIC-COLD, RARGE-COLD, RARGE-LIGHT	NA	DBB
greenyellow	1h_de__0.743273242609907	689	550	1h_de.SE;8h_de.SE;	BnaA09g08260D	-0.80889	229.173	chrA09	MSTRG.18979	BnaA09g08260D	AT2G13290	beta-1,4-N-acetylglucosaminyltransferase family protein	F15O11.7	NA	NA	NA
greenyellow	1h_de__0.743273242609907	689	550	8h_de.A3SS;8h_de.A5SS;	MSTRG.26862.4	0.907098	377.013	chrC01	MSTRG.26862	BnaC01g11070D	AT2G32120	heat-shock protein 70T-2	HSP70T-2	NA	NA	NA
magenta	24h_ABA__0.93726898951472	974	938	1h_de.A5SS;	BnaC09g37170D	0.917458	509.341	chrC09	MSTRG.50327	BnaC09g37170D	AT5G20700	Protein of unknown function (DUF581)	T1M15.100	NA	NA	NA
pink	4h_cold__0.605968732460383	1042	960	1h_de.RI;	BnaA07g31020D	0.961906	794.336	chrA07	MSTRG.16072	BnaA07g31020D	AT1G73660	protein tyrosine kinase family protein	F25P22.8	NA	NA	NA
pink	4h_cold__0.605968732460383	1042	960	8h_de.A5SS;	MSTRG.48625.1	0.947721	830.498	chrC09	MSTRG.48625	BnaC09g02930D	AT5G28030	L-cysteine desulfhydrase 1	DES1	NA	NA	NA
pink	4h_cold__0.605968732460383	1042	960	8h_de.RI;	MSTRG.14547.3	0.877185	614.711	chrA07	MSTRG.14547	BnaA07g05140D	AT4G27830	beta glucosidase 10	BGLU10	DRASTIC-COLD, DRASTIC-NACL	NA	NA
salmon	4h_NaCl__0.90038640908659	551	406	8h_de.A3SS;	MSTRG.17195.1	0.852624	894.859	chrA08	MSTRG.17195	BnaA08g10540D	AT4G22950	AGAMOUS-like 19	AGL19	NA	NA	MIKC_MADS
salmon	4h_NaCl__0.90038640908659	551	406	8h_de.A3SS;	BnaC02g39030D	0.978876	473.317	chrC02	MSTRG.30389	BnaC02g39030D	AT5G49360	beta-xylosidase 1	BXL1	NA	NA	NA
salmon	4h_NaCl__0.90038640908659	551	406	8h_de.A3SS;	BnaA09g28020D	0.878041	546.114	chrA09	MSTRG.20079	BnaA09g28020D	AT1G27300	transmembrane protein;(source:Araport11)	F17L21.9	RARGE-NACL	NA	NA
turquoise	8h_de__0.796224581883561	8241	6293	1h_de.A3SS;	BnaC03g05100D	0.85865	1468.11	chrC03	MSTRG.31151	BnaC03g05100D	AT5G11860	SCP1-like small phosphatase 5	SSP5	NA	NA	NA
turquoise	8h_de__0.796224581883561	8241	6293	1h_de.A3SS;8h_de.A3SS;	MSTRG.47101.5	0.84784	1227.8	chrC08	MSTRG.47101	BnaC08g24740D	NA	NA	NA	NA	NA	NA
turquoise	8h_de__0.796224581883561	8241	6293	1h_de.A5SS;8h_de.A5SS;	MSTRG.20871.2	0.911372	1689.42	chrA09	MSTRG.20871	BnaA09g40730D	AT2G25970	KH domain-containing protein	F17H15.1	NA	NA	NA
turquoise	8h_de__0.796224581883561	8241	6293	1h_de.A5SS;8h_de.SE;8h_de.A5SS;	MSTRG.33058.3	0.814547	1023.22	chrC03	MSTRG.33058	BnaC03g38360D	AT3G14200	Chaperone DnaJ-domain superfamily protein	AT3G14200	NA	NA	NA
turquoise	8h_de__0.796224581883561	8241	6293	1h_de.RI;	MSTRG.31175.1	0.814868	1340.35	chrC03	MSTRG.31175	BnaC03g05550D	AT5G12310	RING/U-box superfamily protein	AT5G12310	NA	NA	NA
turquoise	8h_de__0.796224581883561	8241	6293	8h_de.A3SS;	BnaA07g14310D	0.906592	1698.12	chrA07	MSTRG.15056	BnaA07g14310D	AT2G28910	CAX interacting protein 4	CXIP4	NA	NA	NA
turquoise	8h_de__0.796224581883561	8241	6293	8h_de.A3SS;	MSTRG.15056.1	0.837923	1335.43	chrA07	MSTRG.15056	BnaA07g14310D	AT2G28910	CAX interacting protein 4	CXIP4	NA	NA	NA
turquoise	8h_de__0.796224581883561	8241	6293	8h_de.A3SS;8h_de.A5SS;	MSTRG.39327.2	0.848627	1486.44	chrC05	MSTRG.39327	BnaC05g24700D	AT3G28670	oxidoreductase, zinc-binding dehydrogenase family protein	AT3G28670	NA	NA	NA
turquoise	8h_de__0.796224581883561	8241	6293	8h_de.A5SS;	MSTRG.36932.2	0.91698	1621.49	chrC04	MSTRG.36932	BnaC04g38240D	AT2G25970	KH domain-containing protein	F17H15.1	NA	NA	NA
turquoise	8h_de__0.796224581883561	8241	6293	8h_de.A5SS;	MSTRG.48887.2	0.904112	1453.68	chrC09	MSTRG.48887	BnaC09g07820D	AT3G50670	U1 small nuclear ribonucleoprotein-70K	U1-70K	NA	yes	NA
turquoise	8h_de__0.796224581883561	8241	6293	8h_de.SE;	MSTRG.17416.3	0.829585	1015.56	chrA08	MSTRG.17416	BnaA08g14210D	AT4G27000	RNA-binding (RRM/RBD/RNP motifs) family protein	ATRBP45C	RARGE-ABA	yes	NA

## Sheet: cold-hub
Module	Module related trait__cor	Module_transcripst_number	Module_gene_number	AS_type	Transcript in the module	kME	kWithin	Chrome	Gene ID	Darmor ID	AT ID	Gene function	Gene name	Stress gene in Arabidopsis	RBPs	TF
black	24h_cold__0.756163758654314	1431	1252	4h_cold.A5SS;24h_cold.A5SS;	MSTRG.49628.1	0.814036	1003.74	chrC09	MSTRG.49628	BnaC09g22980D	AT1G54460	TPX2 (targeting protein for Xklp2) protein family	F20D21.28	NA	NA	NA
blue	24h_cold__0.945039544297291	8200	7325	4h_cold.RI;	BnaC01g03770D	0.879574	1649.46	chrC01	MSTRG.26437	BnaC01g03770D	AT4G34650	squalene synthase 2	SQS2	NA	NA	NA
blue	24h_cold__0.945039544297291	8200	7325	4h_cold.A5SS;	BnaC05g45490D	0.888501	1751.91	chrC05	MSTRG.40466	BnaC05g45490D	AT3G06330	RING/U-box superfamily protein	F24P17.21	NA	NA	NA
blue	24h_cold__0.945039544297291	8200	7325	4h_cold.A3SS;	BnaA03g21690D	0.810861	937.433	chrA03	MSTRG.5558	BnaA03g21690D	AT2G47250	RNA helicase family protein	T8I13.9	NA	NA	NA
blue	24h_cold__0.945039544297291	8200	7325	4h_cold.A3SS;	BnaA08g15370D	0.851555	1922.81	chrA08	MSTRG.17488	BnaA08g15370D	AT4G36690	U2 snRNP auxilliary factor, large subunit, splicing factor	ATU2AF65A	RARGE-ABA	yes	NA
blue	24h_cold__0.945039544297291	8200	7325	24h_cold.SE;24h_cold.SE;	MSTRG.17688.1	0.811613	1059.2	chrA08	MSTRG.17688	BnaA08g18350D	AT1G28395	hypothetical protein;(source:Araport11)	AT1G28395	NA	NA	NA
blue	24h_cold__0.945039544297291	8200	7325	24h_cold.SE;	MSTRG.34123.2	0.864704	1300.66	chrC03	MSTRG.34123	BnaC03g58610D	AT1G28395	hypothetical protein;(source:Araport11)	AT1G28395	NA	NA	NA
blue	24h_cold__0.945039544297291	8200	7325	24h_cold.SE;	MSTRG.11474.3	0.837645	1525.06	chrA05	MSTRG.11474	BnaA05g33370D	AT3G02750	Protein phosphatase 2C family protein	F13E7.31	NA	NA	NA
blue	24h_cold__0.945039544297291	8200	7325	24h_cold.RI;	MSTRG.12850.1	0.87568	1733.87	chrA06	MSTRG.12850	BnaA06g18830D	AT3G44600	cyclophilin71	CYP71	NA	NA	NA
blue	24h_cold__0.945039544297291	8200	7325	24h_cold.RI;	BnaA06g18830D	0.826623	1464.2	chrA06	MSTRG.12850	BnaA06g18830D	AT3G44600	cyclophilin71	CYP71	NA	NA	NA
blue	24h_cold__0.945039544297291	8200	7325	24h_cold.RI;	BnaC01g38060D	0.837652	1544.84	chrC01	MSTRG.28222	BnaC01g38060D	AT3G13040	myb-like HTH transcriptional regulator family protein	MGH6.22	NA	NA	G2-like
blue	24h_cold__0.945039544297291	8200	7325	24h_cold.RI;	MSTRG.23151.1	0.833715	1290.97	chrA10	MSTRG.23151	BnaA10g21460D	AT5G10940	transducin family protein / WD-40 repeat family protein	ASG2	NA	NA	NA
blue	24h_cold__0.945039544297291	8200	7325	24h_cold.A3SS;	BnaA05g14760D	0.941345	2158.8	chrA05	MSTRG.10332	BnaA05g14760D	AT1G31280	Argonaute family protein	AGO2	NA	NA	NA
blue	24h_cold__0.945039544297291	8200	7325	24h_cold.A3SS;	MSTRG.12596.1	0.930728	2217.47	chrA06	MSTRG.12596	BnaA06g14330D	AT1G20260	ATPase, V1 complex, subunit B protein	VAB3	NA	NA	NA
blue	24h_cold__0.945039544297291	8200	7325	24h_cold.A3SS;	BnaA06g14330D	0.819418	1691.31	chrA06	MSTRG.12596	BnaA06g14330D	AT1G20260	ATPase, V1 complex, subunit B protein	VAB3	NA	NA	NA
blue	24h_cold__0.945039544297291	8200	7325	24h_cold.A3SS;	MSTRG.2281.3	0.814359	1483.84	chrA02	MSTRG.2281	BnaA02g00870D	AT5G11200	DEAD/DEAH box RNA helicase family protein	UAP56b	NA	yes	NA
brown	8h_de__0.679427694730839	3485	2887	4h_cold.A5SS;	MSTRG.38426.1	0.898389	1132.85	chrC05	MSTRG.38426	BnaC05g08380D	AT1G10890	arginine/glutamate-rich 1 protein;(source:Araport11)	T19D16.19	NA	NA	NA
brown	8h_de__0.679427694730839	3485	2887	4h_cold.A5SS;	MSTRG.12136.2	0.848792	1068.01	chrA06	MSTRG.12136	BnaA06g06700D	AT1G10890	arginine/glutamate-rich 1 protein;(source:Araport11)	T19D16.19	NA	NA	NA
brown	8h_de__0.679427694730839	3485	2887	4h_cold.A3SS;	BnaC09g47290D	-0.919519	1543.04	chrC09	MSTRG.50920	BnaC09g47290D	AT5G08740	NAD(P)H dehydrogenase C1	NDC1	NA	NA	NA
brown	8h_de__0.679427694730839	3485	2887	24h_cold.SE;	BnaC05g46620D	0.840718	568.261	chrC05	MSTRG.40530	BnaC05g46620D	AT3G05165	Major facilitator superfamily protein	AT3G05165	NA	NA	NA
brown	8h_de__0.679427694730839	3485	2887	24h_cold.SE;	MSTRG.17128.1	0.927968	1170.17	chrA08	MSTRG.17128	BnaA08g09100D	AT4G19160	transglutaminase family protein;(source:Araport11)	T18B16.130	NA	NA	NA
brown	8h_de__0.679427694730839	3485	2887	24h_cold.A3SS;24h_cold.RI;	MSTRG.8657.3	0.890019	856.969	chrA04	MSTRG.8657	BnaA04g15260D	AT2G25930	hydroxyproline-rich glycoprotein family protein	ELF3	NA	NA	NA
brown	8h_de__0.679427694730839	3485	2887	24h_cold.A3SS;	MSTRG.14782.1	0.947419	1099.12	chrA07	MSTRG.14782	BnaA07g09480D	NA	NA	NA	NA	NA	NA
brown	8h_de__0.679427694730839	3485	2887	24h_cold.A3SS;	MSTRG.2504.6	0.842938	948.175	chrA02	MSTRG.2504	BnaA02g04100D	NA	NA	NA	NA	NA	NA
cyan	4h_ABA__0.639339571682146	466	438	24h_cold.A3SS;24h_cold.A3SS;	BnaC06g33790D	0.841851	688.892	chrC06	MSTRG.42525	BnaC06g33790D	AT1G72640	NAD(P)-binding Rossmann-fold superfamily protein	F28P22.17	NA	NA	NA
darkturquoise	4h_cold__0.605653111732682	85	68	4h_cold.A5SS;	BnaC07g45720D	0.941173	212.002	chrC07	MSTRG.45499	BnaC07g45720D	AT4G35600	Protein kinase superfamily protein	CST	NA	NA	NA
green	4h_cold__0.986366400852756	2478	2003	4h_cold.SE;	BnaC06g12130D	0.986408	767.514	chrC06	MSTRG.41330	BnaC06g12130D	AT5G37260	Homeodomain-like superfamily protein	RVE2	NA	NA	MYB_related
green	4h_cold__0.986366400852756	2478	2003	4h_cold.SE;	MSTRG.42565.4	0.88652	709.611	chrC06	MSTRG.42565	BnaC06g34470D	AT1G73660	protein tyrosine kinase family protein	F25P22.8	NA	NA	NA
green	4h_cold__0.986366400852756	2478	2003	4h_cold.A5SS;	MSTRG.18693.2	0.905538	796.168	chrA09	MSTRG.18693	BnaA09g03550D	AT5G28030	L-cysteine desulfhydrase 1	DES1	NA	NA	NA
green	4h_cold__0.986366400852756	2478	2003	4h_cold.A3SS;	MSTRG.50920.1	0.890194	667.409	chrC09	MSTRG.50920	BnaC09g47290D	AT5G08740	NAD(P)H dehydrogenase C1	NDC1	NA	NA	NA
green	4h_cold__0.986366400852756	2478	2003	4h_cold.A3SS;	BnaC08g26270D	0.873798	797.201	chrC08	MSTRG.47198	BnaC08g26270D	AT3G55450	PBS1-like 1	PBL1	RARGE-DROUGHT	NA	NA
green	4h_cold__0.986366400852756	2478	2003	4h_cold.A3SS;	BnaC05g46010D	0.902379	833.966	chrC05	MSTRG.40493	BnaC05g46010D	AT3G05840	Protein kinase superfamily protein	ATSK12	NA	NA	NA
green	4h_cold__0.986366400852756	2478	2003	4h_cold.A3SS;	BnaA03g17970D	0.935519	671.017	chrA03	MSTRG.5332	BnaA03g17970D	AT2G38640	Protein of unknown function (DUF567)	T6A23.16	NA	NA	NA
green	4h_cold__0.986366400852756	2478	2003	4h_cold.A3SS;	BnaA03g17960D	0.914744	707.603	chrA03	MSTRG.5332	BnaA03g17970D	AT2G38640	Protein of unknown function (DUF567)	T6A23.16	NA	NA	NA
green	4h_cold__0.986366400852756	2478	2003	4h_cold.A3SS;	MSTRG.13717.1	0.967229	688.157	chrA06	MSTRG.13717	BnaA06g32810D	AT3G26580	Tetratricopeptide repeat (TPR)-like superfamily protein	AT3G26580	NA	NA	NA
green	4h_cold__0.986366400852756	2478	2003	4h_cold.A3SS;	MSTRG.26624.3	0.841638	758.881	chrC01	MSTRG.26624	BnaC01g06900D	AT4G31550	WRKY DNA-binding protein 11	WRKY11	RARGE-ABA, RARGE-COLD, RARGE-LIGHT	NA	WRKY
green	4h_cold__0.986366400852756	2478	2003	24h_cold.RI;	MSTRG.33107.3	0.838916	372.974	chrC03	MSTRG.33107	BnaC03g39300D	AT3G15840	post-illumination chlorophyll fluorescence increase	PIFI	GEO-NACL	NA	NA
green	4h_cold__0.986366400852756	2478	2003	24h_cold.A5SS;	MSTRG.34438.3	0.849762	633.023	chrC03	MSTRG.34438	BnaC03g65170D	AT4G23180	cysteine-rich RLK (RECEPTOR-like protein kinase) 10	CRK10	NA	NA	NA
lightcyan	8h_de__0.65968012911167	240	176	24h_cold.RI;	BnaC03g39300D	0.937619	590.889	chrC03	MSTRG.33107	BnaC03g39300D	AT3G15840	post-illumination chlorophyll fluorescence increase	PIFI	GEO-NACL	NA	NA
lightgreen	4h_cold__0.625045557615691	188	161	4h_cold.SE;24h_cold.SE;	MSTRG.11411.1	0.805246	139.48	chrA05	MSTRG.11411	BnaA05g32290D	AT3G02990	heat shock transcription factor A1E	HSFA1E	NA	NA	NA
magenta	24h_ABA__0.93726898951472	974	938	4h_cold.SE;4h_cold.A5SS;	MSTRG.11046.2	0.868142	411.727	chrA05	MSTRG.11046	BnaA05g27090D	AT1G55310	SC35-like splicing factor 33	SCL33	RARGE-NACL	yes	NA
midnightblue	4h_ABA__0.918213331816146	251	238	24h_cold.RI;	MSTRG.9639.1	0.817881	329.551	chrA05	MSTRG.9639	BnaA05g02730D	AT2G42300	basic helix-loop-helix (bHLH) DNA-binding superfamily protein	MHK10.2	NA	NA	bHLH
pink	4h_cold__0.605968732460383	1042	960	4h_cold.SE;4h_cold.A3SS;4h_cold.RI;24h_cold.RI;	BnaA10g00780D	0.870245	488.991	chrA10	MSTRG.21890	BnaA10g00780D	AT1G01060	Homeodomain-like superfamily protein	LHY	DRASTIC-COLD, RARGE-COLD	NA	MYB_related
pink	4h_cold__0.605968732460383	1042	960	4h_cold.SE;	BnaA09g45250D	0.899101	658.659	chrA09	MSTRG.21126	BnaA09g45250D	AT1G15080	lipid phosphate phosphatase 2	LPP2	NA	NA	NA
pink	4h_cold__0.605968732460383	1042	960	24h_cold.SE;	MSTRG.30873.2	0.827049	551.105	chrC03	MSTRG.30873	BnaC03g00040D	AT1G01060	Homeodomain-like superfamily protein	LHY	DRASTIC-COLD, RARGE-COLD	NA	MYB_related
pink	4h_cold__0.605968732460383	1042	960	24h_cold.A3SS;	BnaA03g22610D	0.875466	471.548	chrA03	MSTRG.5627	BnaA03g22610D	AT2G26800	Aldolase superfamily protein	AT2G26800	RARGE-ABA	NA	NA
purple	4h_cold__0.66518816477597	932	760	4h_cold.SE;	MSTRG.17460.1	0.828771	346.714	chrA08	MSTRG.17460	BnaA08g14950D	AT4G35600	Protein kinase superfamily protein	CST	NA	NA	NA
purple	4h_cold__0.66518816477597	932	760	4h_cold.A5SS;24h_cold.A5SS;	MSTRG.15958.1	0.8566	545.303	chrA07	MSTRG.15958	BnaA07g29290D	AT1G71360	Galactose-binding protein	AtSUN4	NA	NA	NA
purple	4h_cold__0.66518816477597	932	760	4h_cold.A5SS;24h_cold.A5SS;	BnaA07g29290D	0.839315	896.079	chrA07	MSTRG.15958	BnaA07g29290D	AT1G71360	Galactose-binding protein	AtSUN4	NA	NA	NA
purple	4h_cold__0.66518816477597	932	760	4h_cold.A5SS;24h_cold.A5SS;	MSTRG.15958.3	0.833929	948.182	chrA07	MSTRG.15958	BnaA07g29290D	AT1G71360	Galactose-binding protein	AtSUN4	NA	NA	NA
purple	4h_cold__0.66518816477597	932	760	4h_cold.A3SS;	BnaA10g08220D	0.824211	520.607	chrA10	MSTRG.22302	BnaA10g08220D	AT5G54390	HAL2-like	HL	NA	NA	NA
purple	4h_cold__0.66518816477597	932	760	4h_cold.A3SS;	BnaC07g23660D	-0.905932	1031.8	chrC07	MSTRG.44268	BnaC07g23660D	AT3G26580	Tetratricopeptide repeat (TPR)-like superfamily protein	AT3G26580	NA	NA	NA
salmon	4h_NaCl__0.90038640908659	551	406	4h_cold.SE;	MSTRG.42342.4	0.837074	131.063	chrC06	MSTRG.42342	BnaC06g30750D	NA	NA	NA	NA	NA	NA
salmon	4h_NaCl__0.90038640908659	551	406	4h_cold.A3SS;	BnaA07g07050D	0.838377	419.468	chrA07	MSTRG.14663	BnaA07g07050D	AT1G30820	CTP synthase family protein	T17H7.12	NA	NA	NA
turquoise	8h_de__0.796224581883561	8241	6293	4h_cold.SE;	BnaC09g20000D	0.934752	1680.72	chrC09	MSTRG.49471	BnaC09g20000D	AT5G47100	calcineurin B-like protein 9	CBL9	NA	NA	NA
turquoise	8h_de__0.796224581883561	8241	6293	4h_cold.A5SS;	MSTRG.12136.3	0.86526	1262.44	chrA06	MSTRG.12136	BnaA06g06700D	AT1G10890	arginine/glutamate-rich 1 protein;(source:Araport11)	T19D16.19	NA	NA	NA
turquoise	8h_de__0.796224581883561	8241	6293	4h_cold.A5SS;	MSTRG.35172.3	0.822266	1068.82	chrC04	MSTRG.35172	BnaC04g01070D	AT2G46270	G-box binding factor 3	GBF3	DRASTIC-COLD, DRASTIC-DROUGHT, DRASTIC-NACL, RARGE-DROUGHT, RARGE-NACL	NA	bZIP
turquoise	8h_de__0.796224581883561	8241	6293	4h_cold.A3SS;	MSTRG.17488.3	0.888685	1334.73	chrA08	MSTRG.17488	BnaA08g15370D	AT4G36690	U2 snRNP auxilliary factor, large subunit, splicing factor	ATU2AF65A	RARGE-ABA	yes	NA
turquoise	8h_de__0.796224581883561	8241	6293	4h_cold.A3SS;	MSTRG.17488.1	0.809505	892.649	chrA08	MSTRG.17488	BnaA08g15370D	AT4G36690	U2 snRNP auxilliary factor, large subunit, splicing factor	ATU2AF65A	RARGE-ABA	yes	NA
turquoise	8h_de__0.796224581883561	8241	6293	24h_cold.SE;	MSTRG.11474.2	0.86792	1420.8	chrA05	MSTRG.11474	BnaA05g33370D	AT3G02750	Protein phosphatase 2C family protein	F13E7.31	NA	NA	NA
turquoise	8h_de__0.796224581883561	8241	6293	24h_cold.RI;	BnaC07g35550D	0.897931	1662.45	chrC07	MSTRG.44963	BnaC07g35550D	AT4G18910	NOD26-like intrinsic protein 1;2	NIP1;2	NA	NA	NA
turquoise	8h_de__0.796224581883561	8241	6293	24h_cold.RI;	MSTRG.44963.1	0.805484	1267.75	chrC07	MSTRG.44963	BnaC07g35550D	AT4G18910	NOD26-like intrinsic protein 1;2	NIP1;2	NA	NA	NA
turquoise	8h_de__0.796224581883561	8241	6293	24h_cold.RI;	MSTRG.35293.2	0.884773	1322.54	chrC04	MSTRG.35293	BnaC04g03380D	AT2G44140	Peptidase family C54 protein	F6E13.27	NA	NA	NA
turquoise	8h_de__0.796224581883561	8241	6293	24h_cold.A3SS;	BnaC09g41010D	0.806228	1187.84	chrC09	MSTRG.50526	BnaC09g41010D	AT5G16840	binding partner of acd11 1	BPA1	NA	NA	NA
turquoise	8h_de__0.796224581883561	8241	6293	24h_cold.A3SS;	BnaC05g36720D	0.931623	1865.89	chrC05	MSTRG.39923	BnaC05g36720D	AT3G16520	UDP-glucosyl transferase 88A1	UGT88A1	NA	NA	NA
turquoise	8h_de__0.796224581883561	8241	6293	24h_cold.A3SS;	MSTRG.39923.3	0.89232	1553.15	chrC05	MSTRG.39923	BnaC05g36720D	AT3G16520	UDP-glucosyl transferase 88A1	UGT88A1	NA	NA	NA
turquoise	8h_de__0.796224581883561	8241	6293	24h_cold.A3SS;	MSTRG.39923.2	0.815435	1333.41	chrC05	MSTRG.39923	BnaC05g36720D	AT3G16520	UDP-glucosyl transferase 88A1	UGT88A1	NA	NA	NA
yellow	24h_NaCl__0.658022996369359	3043	2689	4h_cold.SE;4h_cold.A3SS;4h_cold.A3SS;4h_cold.RI;24h_cold.RI;	MSTRG.21890.3	0.847234	465.664	chrA10	MSTRG.21890	BnaA10g00780D	AT1G01060	Homeodomain-like superfamily protein	LHY	DRASTIC-COLD, RARGE-COLD	NA	MYB_related
yellow	24h_NaCl__0.658022996369359	3043	2689	24h_cold.SE;24h_cold.A5SS;	BnaA06g13890D	0.807319	1151.45	chrA06	MSTRG.12560	BnaA06g13890D	AT1G19720	Pentatricopeptide repeat (PPR-like) superfamily protein	F14P1.33	NA	NA	NA
yellow	24h_NaCl__0.658022996369359	3043	2689	24h_cold.A3SS;24h_cold.A3SS;	MSTRG.42525.3	0.896421	634.058	chrC06	MSTRG.42525	BnaC06g33790D	AT1G72640	NAD(P)-binding Rossmann-fold superfamily protein	F28P22.17	NA	NA	NA
yellow	24h_NaCl__0.658022996369359	3043	2689	24h_cold.A3SS;	BnaA02g05150D	0.805644	453.049	chrA02	MSTRG.2580	BnaA02g05150D	AT5G20935	DUF3148 family protein;(source:Araport11)	CRR42	NA	NA	NA
yellow	24h_NaCl__0.658022996369359	3043	2689	24h_cold.A3SS;	BnaC01g28660D	0.918889	1155.43	chrC01	MSTRG.27771	BnaC01g28660D	AT1G60600	UbiA prenyltransferase family protein	ABC4	NA	NA	NA

## Sheet: ABA-hub
Module	Module related trait__cor	Module_transcripst_number	Module_gene_number	AS_type	Transcript in the module	kME	kWithin	Chrome	Gene ID	Darmor ID	AT ID	Gene function	Gene name	Stress gene in Arabidopsis	RBPs	TF
black	24h_cold__0.756163758654314	1431	1252	4h_ABA.A3SS;	MSTRG.44166.1	0.912527	1318.95	chrC07	MSTRG.44166	BnaC07g21990D	AT2G02870	Galactose oxidase/kelch repeat superfamily protein	T17M13.4	NA	NA	NA
blue	24h_cold__0.945039544297291	8200	7325	24h_ABA.A3SS;	MSTRG.4016.1	0.819885	1188.16	chrA02	MSTRG.4016	BnaA02g33090D	AT5G61960	MEI2-like protein 1	ML1	NA	NA	NA
cyan	4h_ABA__0.639339571682146	466	438	24h_ABA.RI;	BnaA04g13930D	0.850213	1067.99	chrA04	MSTRG.8592	BnaA04g13930D	AT2G23820	Metal-dependent phosphohydrolase	T29E15.2	NA	NA	NA
green	4h_cold__0.986366400852756	2478	2003	4h_ABA.SE;	MSTRG.12046.1	0.830536	430.795	chrA06	MSTRG.12046	BnaA06g05190D	AT1G08910	zinc ion binding;zinc ion binding	F7G19.21	NA	NA	NA
green	4h_cold__0.986366400852756	2478	2003	24h_ABA.A3SS;	BnaA03g34680D	0.939564	643.511	chrA03	MSTRG.6362	BnaA03g34680D	AT3G17700	cyclic nucleotide-binding transporter 1	CNBT1	NA	NA	NA
green	4h_cold__0.986366400852756	2478	2003	24h_ABA.A3SS;	MSTRG.6362.1	0.938802	655.482	chrA03	MSTRG.6362	BnaA03g34680D	AT3G17700	cyclic nucleotide-binding transporter 1	CNBT1	NA	NA	NA
magenta	24h_ABA__0.93726898951472	974	938	24h_ABA.A5SS;	BnaA10g12770D	0.924767	323.828	chrA10	MSTRG.22572	BnaA10g12770D	AT5G59780	myb domain protein 59	MYB59	NA	NA	MYB
pink	4h_cold__0.605968732460383	1042	960	4h_ABA.SE;	MSTRG.36680.5	-0.827205	373.292	chrC04	MSTRG.36680	BnaC04g32920D	AT5G40810	Cytochrome C1 family	MHK7.4	NA	NA	NA
turquoise	8h_de__0.796224581883561	8241	6293	4h_ABA.A3SS;	MSTRG.4589.2	0.88013	1321.87	chrA03	MSTRG.4589	BnaA03g05160D	AT5G15020	SIN3-like 2	SNL2	NA	NA	NA

## Sheet: NaCl-hub
Module	Module related trait__cor	Module_transcripst_number	Module_gene_number	AS_type	Transcript in the module	kME	kWithin	Chrome	Gene ID	Darmor ID	AT ID	Gene function	Gene name	Stress gene in Arabidopsis	RBPs	TF
black	24h_cold__0.756163758654314	1431	1252	24h_NaCl.A3SS;	MSTRG.38321.1	0.88096	1532.75	chrC05	MSTRG.38321	BnaC05g06630D	AT1G09140	SERINE-ARGININE PROTEIN 30	SR30	NA	yes	NA
black	24h_cold__0.756163758654314	1431	1252	24h_NaCl.A3SS;	MSTRG.38321.2	0.826677	1029.02	chrC05	MSTRG.38321	BnaC05g06630D	AT1G09140	SERINE-ARGININE PROTEIN 30	SR30	NA	yes	NA
blue	24h_cold__0.945039544297291	8200	7325	4h_NaCl.A5SS;	MSTRG.22626.1	0.922191	1953.34	chrA10	MSTRG.22626	BnaA10g13800D	AT5G22650	histone deacetylase 2B	HD2B	NA	NA	NA
blue	24h_cold__0.945039544297291	8200	7325	4h_NaCl.A5SS;	MSTRG.22626.2	0.962674	2392.08	chrA10	MSTRG.22626	BnaA10g13800D	AT5G22650	histone deacetylase 2B	HD2B	NA	NA	NA
brown	8h_de__0.679427694730839	3485	2887	4h_NaCl.SE;24h_NaCl.SE;	MSTRG.33758.4	0.823421	553.955	chrC03	MSTRG.33758	BnaC03g51470D	AT5G62760	P-loop containing nucleoside triphosphate hydrolases superfamily protein	MQB2.8	NA	NA	NA
pink	4h_cold__0.605968732460383	1042	960	4h_NaCl.A3SS;	MSTRG.22103.2	0.845505	443.106	chrA10	MSTRG.22103	BnaA10g04470D	AT1G07010	Calcineurin-like metallo-phosphoesterase superfamily protein	SLP1	RARGE-LIGHT	NA	NA
turquoise	8h_de__0.796224581883561	8241	6293	24h_NaCl.A5SS;	MSTRG.34706.2	0.922599	1628.59	chrC03	MSTRG.34706	BnaC03g70430D	AT3G13570	SC35-like splicing factor 30A	SCL30A	NA	yes	NA
yellow	24h_NaCl__0.658022996369359	3043	2689	4h_NaCl.A3SS;	MSTRG.22103.1	0.820033	457.316	chrA10	MSTRG.22103	BnaA10g04470D	AT1G07010	Calcineurin-like metallo-phosphoesterase superfamily protein	SLP1	RARGE-LIGHT	NA	NA

## Sheet: multiple stresses-hub
Module	Module related trait__cor	Module_transcripst_number	Module_gene_number	AS_type	Transcript in the module	kME	kWithin	Chrome	Gene ID	Darmor ID	AT ID	Gene function	Gene name	Stress gene in Arabidopsis	RBPs	TF
black	24h_cold__0.756163758654314	1431	1252	1h_de.A5SS;8h_de.A5SS;24h_cold.A5SS;4h_NaCl.A5SS;	MSTRG.39031.1	0.876343	1048.89	chrC05	MSTRG.39031	BnaC05g18760D	AT1G23440	Peptidase C15, pyroglutamyl peptidase I-like	F28C11.26	NA	NA	NA
blue	24h_cold__0.945039544297291	8200	7325	8h_de.A3SS;24h_cold.A3SS;24h_cold.A5SS;4h_NaCl.A3SS;	MSTRG.27581.1	0.897179	1890.92	chrC01	MSTRG.27581	BnaC01g23810D	AT3G50660	Cytochrome P450 superfamily protein	DWF4	NA	NA	NA
blue	24h_cold__0.945039544297291	8200	7325	8h_de.A3SS;24h_cold.A3SS;24h_cold.A5SS;4h_NaCl.A3SS;	MSTRG.27581.2	0.878937	1685.54	chrC01	MSTRG.27581	BnaC01g23810D	AT3G50660	Cytochrome P450 superfamily protein	DWF4	NA	NA	NA
blue	24h_cold__0.945039544297291	8200	7325	8h_de.A5SS;24h_NaCl.A5SS;	MSTRG.23138.1	0.906557	1856.36	chrA10	MSTRG.23138	BnaA10g21260D	AT5G11200	DEAD/DEAH box RNA helicase family protein	UAP56b	NA	yes	NA
blue	24h_cold__0.945039544297291	8200	7325	8h_de.A5SS;4h_cold.A5SS;	MSTRG.8659.1	0.893866	1811.48	chrA04	MSTRG.8659	BnaA04g15300D	AT2G25970	KH domain-containing protein	F17H15.1	NA	NA	NA
blue	24h_cold__0.945039544297291	8200	7325	8h_de.RI;24h_ABA.RI;	MSTRG.46899.4	0.812209	866.727	chrC08	MSTRG.46899	BnaC08g21130D	AT3G49430	SER/ARG-rich protein 34A	SR34a	NA	yes	NA
blue	24h_cold__0.945039544297291	8200	7325	8h_de.SE;24h_cold.SE;	MSTRG.42815.2	0.84548	1230.31	chrC06	MSTRG.42815	BnaC06g38570D	AT1G78070	Transducin/WD40 repeat-like superfamily protein	F28K19.28	DRASTIC-COLD, DRASTIC-DROUGHT, DRASTIC-NACL, RARGE-ABA, RARGE-DROUGHT, RARGE-LIGHT, RARGE-NACL	NA	NA
brown	8h_de__0.679427694730839	3485	2887	8h_de.SE;4h_ABA.SE;4h_NaCl.SE;24h_NaCl.SE;	MSTRG.1012.2	0.802299	831.538	chrA01	MSTRG.1012	BnaA01g16060D	AT4G27000	RNA-binding (RRM/RBD/RNP motifs) family protein	ATRBP45C	RARGE-ABA	yes	NA
brown	8h_de__0.679427694730839	3485	2887	8h_de.A3SS;4h_NaCl.A3SS;24h_NaCl.A3SS;	MSTRG.42942.1	0.848988	1247.89	chrC06	MSTRG.42942	BnaC06g40580D	AT2G47580	spliceosomal protein U1A	U1A	NA	yes	NA
darkturquoise	4h_cold__0.605653111732682	85	68	1h_de.RI;8h_de.RI;4h_cold.RI;24h_cold.RI;4h_NaCl.RI;	BnaC04g41100D	0.850508	246.111	chrC04	MSTRG.37091	BnaC04g41100D	AT2G30440	thylakoid processing peptide	TPP	RARGE-NACL	NA	NA
green	4h_cold__0.986366400852756	2478	2003	4h_cold.A5SS;4h_NaCl.A5SS;	BnaC02g01960D	0.847844	487.328	chrC02	MSTRG.28675	BnaC02g01960D	AT5G06530	ABC-2 type transporter family protein	ABCG22	NA	NA	NA
green	4h_cold__0.986366400852756	2478	2003	1h_de.RI;8h_de.RI;4h_cold.RI;	MSTRG.9519.2	0.833167	399.292	chrA05	MSTRG.9519	BnaA05g01050D	AT2G46830	circadian clock associated 1	CCA1	DRASTIC-COLD, DRASTIC-DROUGHT	NA	MYB_related
green	4h_cold__0.986366400852756	2478	2003	1h_de.RI;8h_de.RI;4h_cold.RI;	MSTRG.9519.4	0.815722	351.892	chrA05	MSTRG.9519	BnaA05g01050D	AT2G46830	circadian clock associated 1	CCA1	DRASTIC-COLD, DRASTIC-DROUGHT	NA	MYB_related
green	4h_cold__0.986366400852756	2478	2003	8h_de.A5SS;4h_ABA.A5SS;4h_NaCl.A5SS;	BnaC03g60490D	0.829155	433.208	chrC03	MSTRG.34246	BnaC03g60490D	AT4G39260	cold, circadian rhythm, and RNA binding 1	CCR1	DRASTIC-NACL, RARGE-COLD	yes	NA
green	4h_cold__0.986366400852756	2478	2003	8h_de.A5SS;4h_ABA.A5SS;4h_NaCl.A5SS;	MSTRG.34246.1	0.947818	664.544	chrC03	MSTRG.34246	BnaC03g60490D	AT4G39260	cold, circadian rhythm, and RNA binding 1	CCR1	DRASTIC-NACL, RARGE-COLD	yes	NA
green	4h_cold__0.986366400852756	2478	2003	8h_de.RI;4h_cold.SE;4h_cold.A5SS;4h_cold.RI;	BnaC05g00840D	0.939618	721.121	chrC05	MSTRG.37961	BnaC05g00840D	AT1G01060	Homeodomain-like superfamily protein	LHY	DRASTIC-COLD, RARGE-COLD	NA	MYB_related
green	4h_cold__0.986366400852756	2478	2003	8h_de.RI;4h_cold.SE;4h_cold.A5SS;4h_cold.RI;	MSTRG.37961.3	0.826321	462.027	chrC05	MSTRG.37961	BnaC05g00840D	AT1G01060	Homeodomain-like superfamily protein	LHY	DRASTIC-COLD, RARGE-COLD	NA	MYB_related
green	4h_cold__0.986366400852756	2478	2003	1h_de.RI;8h_de.RI;4h_ABA.RI;	BnaC09g48940D	0.889588	735.018	chrC09	MSTRG.51018	BnaC09g48950D	NA	NA	NA	NA	NA	NA
green	4h_cold__0.986366400852756	2478	2003	1h_de.RI;8h_de.RI;4h_ABA.RI;	MSTRG.51018.4	0.842187	570.489	chrC09	MSTRG.51018	BnaC09g48950D	NA	NA	NA	NA	NA	NA
green	4h_cold__0.986366400852756	2478	2003	1h_de.SE;1h_de.A5SS;4h_NaCl.SE;4h_NaCl.A5SS;	MSTRG.46528.1	0.868036	496.83	chrC08	MSTRG.46528	BnaC08g14470D	AT1G10650	SBP (S-ribonuclease binding protein) family protein	F20B24.9	NA	NA	NA
greenyellow	1h_de__0.743273242609907	689	550	1h_de.A3SS;8h_de.A3SS;24h_cold.A3SS;24h_NaCl.A3SS;	BnaC04g21400D	0.897681	203.645	chrC04	MSTRG.36117	BnaC04g21400D	AT3G62260	Protein phosphatase 2C family protein	AT3G62260	NA	NA	NA
lightgreen	4h_cold__0.625045557615691	188	161	8h_de.A5SS;4h_ABA.A5SS;4h_NaCl.A5SS;	MSTRG.34246.2	0.812868	162.725	chrC03	MSTRG.34246	BnaC03g60490D	AT4G39260	cold, circadian rhythm, and RNA binding 1	CCR1	DRASTIC-NACL, RARGE-COLD	yes	NA
pink	4h_cold__0.605968732460383	1042	960	1h_de.RI;8h_de.RI;4h_cold.RI;	MSTRG.9519.1	0.847205	446.669	chrA05	MSTRG.9519	BnaA05g01050D	AT2G46830	circadian clock associated 1	CCA1	DRASTIC-COLD, DRASTIC-DROUGHT	NA	MYB_related
pink	4h_cold__0.605968732460383	1042	960	4h_cold.A5SS;4h_ABA.A5SS;	MSTRG.1717.2	0.873254	451.602	chrA01	MSTRG.1717	BnaA01g28800D	AT3G15354	SPA1-related 3	SPA3	NA	NA	NA
purple	4h_cold__0.66518816477597	932	760	4h_ABA.RI;4h_NaCl.RI;	BnaC09g11570D	0.931504	935.715	chrC09	MSTRG.49105	BnaC09g11570D	AT1G63830	PLAC8 family protein	T12P18.15	NA	NA	NA
purple	4h_cold__0.66518816477597	932	760	4h_ABA.RI;4h_NaCl.RI;	MSTRG.49105.2	0.886084	516.537	chrC09	MSTRG.49105	BnaC09g11570D	AT1G63830	PLAC8 family protein	T12P18.15	NA	NA	NA
purple	4h_cold__0.66518816477597	932	760	1h_de.SE;1h_de.A5SS;8h_de.SE;8h_de.A5SS;4h_NaCl.SE;	MSTRG.50604.3	0.875442	537.251	chrC09	MSTRG.50604	BnaC09g42270D	AT5G38280	PR5-like receptor kinase	PR5K	NA	NA	NA
salmon	4h_NaCl__0.90038640908659	551	406	8h_de.SE;4h_NaCl.SE;	MSTRG.9539.3	0.838794	151.379	chrA05	MSTRG.9539	BnaA05g01280D	AT2G46550	transmembrane protein;(source:Araport11)	F13A10.8	NA	NA	NA
turquoise	8h_de__0.796224581883561	8241	6293	1h_de.RI;8h_de.RI;24h_cold.RI;4h_ABA.RI;24h_ABA.RI;4h_NaCl.RI;24h_NaCl.RI;	MSTRG.926.1	0.807363	1026.48	chrA01	MSTRG.926	BnaA01g14750D	AT4G25500	arginine/serine-rich splicing factor 35	RS40	RARGE-ABA, RARGE-COLD	yes	NA
turquoise	8h_de__0.796224581883561	8241	6293	8h_de.RI;24h_cold.RI;4h_NaCl.RI;	MSTRG.29865.2	0.967653	2049.97	chrC02	MSTRG.29865	BnaC02g27330D	AT1G76310	CYCLIN B2;4	CYCB2;4	NA	NA	NA
turquoise	8h_de__0.796224581883561	8241	6293	24h_cold.A3SS;24h_cold.RI;24h_ABA.A3SS;24h_ABA.RI;24h_NaCl.RI;	MSTRG.46125.2	0.849475	1182.65	chrC08	MSTRG.46125	BnaC08g06400D	AT1G23580	Domain of unknown function DUF220	F28C11.28	NA	NA	NA
turquoise	8h_de__0.796224581883561	8241	6293	24h_cold.A3SS;4h_ABA.A3SS;	BnaA03g41520D	0.849933	1244.49	chrA03	MSTRG.6776	BnaA03g41520D	AT3G51880	high mobility group B1	HMGB1	NA	NA	NA
turquoise	8h_de__0.796224581883561	8241	6293	1h_de.A5SS;1h_de.RI;8h_de.A3SS;8h_de.A5SS;24h_cold.A3SS;24h_cold.A5SS;	BnaA09g36770D	0.935162	1811.22	chrA09	MSTRG.20621	BnaA09g36770D	AT2G41790	Insulinase (Peptidase family M16) family protein	T11A7.11	NA	NA	NA
turquoise	8h_de__0.796224581883561	8241	6293	8h_de.A3SS;24h_ABA.A3SS;24h_NaCl.A3SS;	MSTRG.13806.1	0.822243	1303.89	chrA06	MSTRG.13806	BnaA06g34090D	AT2G02570	nucleic acid binding;RNA binding	T8K22.13	NA	yes	NA
turquoise	8h_de__0.796224581883561	8241	6293	24h_cold.A5SS;4h_ABA.A5SS;24h_ABA.A5SS;24h_NaCl.A5SS;	MSTRG.50841.1	0.887375	1529.19	chrC09	MSTRG.50841	BnaC09g45930D	AT5G10650	RING/U-box superfamily protein	MAJ23.10	NA	NA	NA
turquoise	8h_de__0.796224581883561	8241	6293	24h_cold.A5SS;4h_ABA.A5SS;24h_ABA.A5SS;24h_NaCl.A5SS;	MSTRG.50841.2	0.895243	1386.35	chrC09	MSTRG.50841	BnaC09g45930D	AT5G10650	RING/U-box superfamily protein	MAJ23.10	NA	NA	NA
turquoise	8h_de__0.796224581883561	8241	6293	8h_de.A5SS;24h_cold.A5SS;4h_NaCl.A5SS;	MSTRG.13936.3	0.811993	1076.25	chrA06	MSTRG.13936	BnaA06g36130D	AT5G46190	RNA-binding KH domain-containing protein	MCL19.25	NA	yes	NA
turquoise	8h_de__0.796224581883561	8241	6293	1h_de.A5SS;8h_de.A5SS;4h_cold.A5SS;24h_cold.A5SS;4h_ABA.A5SS;24h_ABA.A5SS;4h_NaCl.A5SS;24h_NaCl.A5SS;	BnaA09g18440D	0.852057	1092.83	chrA09	MSTRG.19531	BnaA09g18440D	AT5G47720	Thiolase family protein	AACT1	NA	NA	NA
turquoise	8h_de__0.796224581883561	8241	6293	1h_de.A5SS;8h_de.A5SS;4h_cold.A5SS;24h_cold.A5SS;4h_ABA.A5SS;24h_ABA.A5SS;4h_NaCl.A5SS;24h_NaCl.A5SS;	MSTRG.19531.2	0.902231	1514.48	chrA09	MSTRG.19531	BnaA09g18440D	AT5G47720	Thiolase family protein	AACT1	NA	NA	NA
turquoise	8h_de__0.796224581883561	8241	6293	8h_de.RI;24h_cold.RI;4h_NaCl.RI;	BnaA09g48800D	0.856565	1105.37	chrA09	MSTRG.21319	BnaA09g48800D	AT1G08630	threonine aldolase 1	THA1	NA	NA	NA
yellow	24h_NaCl__0.658022996369359	3043	2689	8h_de.RI;4h_cold.SE;4h_cold.A5SS;4h_cold.RI;	MSTRG.37961.1	0.847101	454.947	chrC05	MSTRG.37961	BnaC05g00840D	AT1G01060	Homeodomain-like superfamily protein	LHY	DRASTIC-COLD, RARGE-COLD	NA	MYB_related
