# Supplementary material for: Differential alternative splicing genes and isoform co-expression networks of Brassica napus under multiple abiotic stresses
Source: Front Plant Sci. 2022 Oct 13;13:1009998. doi: 10.3389/fpls.2022.1009998 (PMC9608124; doi:10.3389/fpls.2022.1009998)
Supplement: Supplementary file 12 [file Table_6.xlsx]

## Sheet: Sheet1
Table S6 Lists of overlap genes between DAS genes and DEGs identified under different abiotic stress conditions
DAS type	DEG type	Gene ID	BaseMean	Log2FoldChange	Pvalue	Padj
1h_de.A3SS;	1h_de.DEG	MSTRG.7261	383.84	4.75872	6.2409e-56	3.11663e-53
1h_de.A3SS;	1h_de.DEG	MSTRG.51415	967.723	4.84578	3.14741e-41	8.55992e-39
1h_de.A5SS;1h_de.RI;	1h_de.DEG	MSTRG.20621	1013.73	4.06842	1.21349e-37	2.76756e-35
1h_de.SE;	1h_de.DEG	MSTRG.36377	623.471	3.30276	5.09988e-23	4.8352e-21
1h_de.A5SS;	1h_de.DEG	MSTRG.39031	357.714	1.93437	5.7131e-21	4.60939e-19
1h_de.A5SS;	1h_de.DEG	MSTRG.19531	291.994	2.68367	1.43136e-17	8.50432e-16
1h_de.A3SS;	1h_de.DEG	MSTRG.36117	140.416	2.3947	2.72374e-13	9.69187e-12
1h_de.RI;	1h_de.DEG	MSTRG.51018	951.302	-3.05875	5.3152e-12	1.57014e-10
1h_de.SE;	1h_de.DEG	MSTRG.14126	1876.01	1.23568	1.59228e-11	4.40913e-10
1h_de.RI;	1h_de.DEG	MSTRG.51018	153.309	-3.27373	2.24664e-09	4.57132e-08
1h_de.RI;	1h_de.DEG	MSTRG.373	201.462	-1.87716	5.2363e-09	1.00342e-07
1h_de.RI;	1h_de.DEG	MSTRG.16072	665.817	-2.19512	3.63161e-08	5.96471e-07
1h_de.A5SS;	1h_de.DEG	MSTRG.51636	715.81	-1.1903	2.02244e-06	2.33243e-05
1h_de.A5SS;	1h_de.DEG	MSTRG.49414	128.132	1.10051	2.94428e-06	3.26804e-05
1h_de.A5SS;	1h_de.DEG	MSTRG.33058	190.584	1.91609	4.78203e-06	5.02755e-05
1h_de.A3SS;1h_de.RI;	1h_de.DEG	MSTRG.14394	35.1003	1.63812	7.20349e-06	7.26102e-05
1h_de.RI;	1h_de.DEG	MSTRG.52023	65.0882	-1.94497	8.07692e-05	0.000617022
1h_de.A3SS;	1h_de.DEG	MSTRG.28298	54.4438	-2.09149	8.87632e-05	0.000668222
1h_de.A5SS;	1h_de.DEG	MSTRG.37371	97.4764	-1.08629	0.000758434	0.00425771
1h_de.RI;	1h_de.DEG	MSTRG.44562	2389.54	-1.32257	0.000870333	0.00479027
1h_de.A3SS;	1h_de.DEG	MSTRG.26902	162.909	-1.78046	0.00126947	0.00661562
1h_de.A5SS;	1h_de.DEG	MSTRG.7030	351.803	1.02201	0.00693138	0.0274232
1h_de.A3SS;	1h_de.DEG	MSTRG.26902	12.9654	-1.79673	0.00789689	0.0304799
8h_de.A5SS;	8h_de.DEG	MSTRG.19531	2234.65	5.45082	3.61531e-129	3.29371e-126
8h_de.A3SS;8h_de.A5SS;	8h_de.DEG	MSTRG.20621	3092.95	5.38195	2.96939e-92	1.16187e-89
8h_de.A3SS;	8h_de.DEG	MSTRG.30389	4021.7	5.83181	1.28445e-75	2.76067e-73
8h_de.A5SS;	8h_de.DEG	MSTRG.7925	770.251	7.06394	3.84817e-69	6.43541e-67
8h_de.A5SS;	8h_de.DEG	MSTRG.7680	2024.79	4.29611	2.72412e-58	2.84726e-56
8h_de.RI;	8h_de.DEG	MSTRG.37961	1582.61	-4.86506	1.6122e-54	1.44932e-52
8h_de.RI;	8h_de.DEG	MSTRG.51018	1103.34	-5.3513	1.71635e-54	1.54068e-52
8h_de.A3SS;	8h_de.DEG	MSTRG.8836	578.939	-6.10019	4.92369e-49	3.68763e-47
8h_de.A3SS;	8h_de.DEG	MSTRG.51415	501.256	3.47664	2.02872e-46	1.34895e-44
8h_de.A5SS;	8h_de.DEG	MSTRG.35503	328.487	4.65726	2.22283e-44	1.35818e-42
8h_de.RI;	8h_de.DEG	MSTRG.14547	345.345	-3.84791	7.73416e-44	4.61931e-42
8h_de.A3SS;	8h_de.DEG	MSTRG.7261	367.37	4.33023	3.58213e-41	1.90631e-39
8h_de.A3SS;	8h_de.DEG	MSTRG.11503	1854.91	-2.48658	2.25136e-39	1.10026e-37
8h_de.A3SS;	8h_de.DEG	MSTRG.15056	962.989	2.00505	8.0066e-37	3.40573e-35
8h_de.A3SS;8h_de.A5SS;	8h_de.DEG	MSTRG.39327	403.22	3.96731	5.51332e-35	2.15037e-33
8h_de.A5SS;	8h_de.DEG	MSTRG.12644	200.264	-3.58617	9.41311e-35	3.62738e-33
8h_de.RI;	8h_de.DEG	MSTRG.21319	690.428	3.74016	1.41293e-34	5.37019e-33
8h_de.A3SS;	8h_de.DEG	MSTRG.17195	248.754	2.50884	7.56725e-30	2.2499e-28
8h_de.A3SS;8h_de.A5SS;	8h_de.DEG	MSTRG.39327	357.295	3.67334	1.1406e-29	3.3456e-28
8h_de.SE;	8h_de.DEG	MSTRG.9539	676.442	3.37576	1.96685e-28	5.30755e-27
8h_de.A5SS;	8h_de.DEG	MSTRG.25225	969.927	1.796	2.396e-27	6.07107e-26
8h_de.A3SS;	8h_de.DEG	MSTRG.38143	356.282	2.77424	5.86724e-27	1.45288e-25
8h_de.A3SS;	8h_de.DEG	MSTRG.24271	92.3992	-3.84598	8.76515e-26	2.01668e-24
8h_de.RI;	8h_de.DEG	MSTRG.51018	181.268	-5.08758	1.37583e-25	3.12079e-24
8h_de.A5SS;	8h_de.DEG	MSTRG.34246	714.652	2.25843	5.3081e-25	1.16007e-23
8h_de.A5SS;	8h_de.DEG	MSTRG.49267	123.969	3.35593	7.48671e-24	1.5233e-22
8h_de.SE;	8h_de.DEG	MSTRG.51305	1923.9	-3.575	1.03431e-23	2.08501e-22
8h_de.A3SS;	8h_de.DEG	MSTRG.51055	161.773	2.46121	1.29526e-23	2.59563e-22
8h_de.A3SS;	8h_de.DEG	MSTRG.13806	374.369	2.03091	1.49908e-23	2.98934e-22
8h_de.RI;	8h_de.DEG	MSTRG.29865	382.036	2.19426	1.50685e-21	2.65493e-20
8h_de.A3SS;8h_de.A5SS;	8h_de.DEG	MSTRG.26862	416.146	2.34255	2.75709e-21	4.76885e-20
8h_de.A3SS;	8h_de.DEG	MSTRG.20079	115.03	3.99048	3.55767e-21	6.09316e-20
8h_de.A3SS;	8h_de.DEG	MSTRG.46506	374.877	2.94147	4.85304e-20	7.67633e-19
8h_de.A3SS;8h_de.RI;	8h_de.DEG	MSTRG.33870	484.709	-2.16394	2.32384e-19	3.49807e-18
8h_de.A3SS;	8h_de.DEG	MSTRG.49708	169.121	2.51492	4.74859e-19	6.99961e-18
8h_de.A5SS;	8h_de.DEG	MSTRG.35994	343.816	1.92377	8.59827e-18	1.14719e-16
8h_de.RI;	8h_de.DEG	MSTRG.926	738.676	1.65834	1.25966e-16	1.53748e-15
8h_de.A5SS;	8h_de.DEG	MSTRG.20871	786.14	1.69124	1.44231e-16	1.75202e-15
8h_de.SE;	8h_de.DEG	MSTRG.18520	107.086	2.22558	1.16367e-14	1.22214e-13
8h_de.A5SS;	8h_de.DEG	MSTRG.22791	856.355	2.07632	5.02594e-14	5.01444e-13
8h_de.SE;	8h_de.DEG	MSTRG.25895	571.892	-1.59888	5.15904e-13	4.67708e-12
8h_de.A3SS;	8h_de.DEG	MSTRG.28410	812.833	1.62715	8.18358e-13	7.27429e-12
8h_de.A3SS;	8h_de.DEG	MSTRG.51301	243.552	-1.75459	9.71875e-13	8.58016e-12
8h_de.A5SS;	8h_de.DEG	MSTRG.34826	326.994	2.41882	2.41547e-12	2.05434e-11
8h_de.RI;	8h_de.DEG	MSTRG.52023	78.6579	-2.33406	7.64286e-12	6.18563e-11
8h_de.A3SS;	8h_de.DEG	MSTRG.42942	109.81	1.84527	1.33671e-11	1.05308e-10
8h_de.RI;	8h_de.DEG	MSTRG.33867	297.728	-1.30276	1.98831e-11	1.54058e-10
8h_de.SE;8h_de.A5SS;	8h_de.DEG	MSTRG.33058	226.077	1.79007	2.25636e-11	1.74097e-10
8h_de.SE;	8h_de.DEG	MSTRG.27308	360.609	1.45722	4.29488e-11	3.22896e-10
8h_de.A5SS;	8h_de.DEG	MSTRG.39031	448.945	1.91146	8.49652e-11	6.20665e-10
8h_de.SE;	8h_de.DEG	MSTRG.53022	694.48	-2.08034	9.8214e-11	7.12924e-10
8h_de.A5SS;	8h_de.DEG	MSTRG.40664	491.394	1.18705	2.24322e-10	1.56917e-09
8h_de.SE;	8h_de.DEG	MSTRG.27069	73.8604	3.28287	3.37321e-10	2.31896e-09
8h_de.SE;	8h_de.DEG	MSTRG.18346	234.978	1.50757	3.82243e-10	2.61336e-09
8h_de.A3SS;8h_de.RI;	8h_de.DEG	MSTRG.50557	598.051	1.6705	4.8003e-10	3.24449e-09
8h_de.A5SS;	8h_de.DEG	MSTRG.17315	263.098	1.2267	1.3572e-09	8.73946e-09
8h_de.A5SS;	8h_de.DEG	MSTRG.13936	171.546	1.52053	1.51776e-09	9.72333e-09
8h_de.RI;	8h_de.DEG	MSTRG.46436	70.1173	2.01302	1.9017e-09	1.20502e-08
8h_de.A5SS;	8h_de.DEG	MSTRG.42567	187.297	1.55812	7.97135e-09	4.71621e-08
8h_de.A3SS;	8h_de.DEG	MSTRG.27581	88.5156	1.83244	8.79183e-09	5.17506e-08
8h_de.A5SS;	8h_de.DEG	MSTRG.36932	601.383	1.00569	9.60787e-09	5.62717e-08
8h_de.SE;	8h_de.DEG	MSTRG.27677	105.715	1.54404	3.76023e-08	2.04784e-07
8h_de.RI;	8h_de.DEG	MSTRG.14394	57.9769	2.12139	5.52529e-08	2.95327e-07
8h_de.A3SS;	8h_de.DEG	MSTRG.5582	259.669	-1.33233	5.62145e-08	3.00283e-07
8h_de.RI;	8h_de.DEG	MSTRG.46436	30.9259	2.65724	2.49017e-07	1.22729e-06
8h_de.A5SS;	8h_de.DEG	MSTRG.49414	182.556	1.33625	5.20222e-07	2.44227e-06
8h_de.RI;	8h_de.DEG	MSTRG.29661	388.271	1.03659	2.9823e-06	1.26311e-05
8h_de.RI;	8h_de.DEG	MSTRG.43096	882.453	-1.00156	3.12235e-06	1.31895e-05
8h_de.A3SS;	8h_de.DEG	MSTRG.32688	422.707	1.06806	3.65468e-06	1.52995e-05
8h_de.SE;	8h_de.DEG	MSTRG.1012	110.29	1.2002	4.59226e-06	1.89399e-05
8h_de.SE;	8h_de.DEG	MSTRG.15345	49.6002	1.69394	5.3001e-06	2.16775e-05
8h_de.A3SS;8h_de.RI;	8h_de.DEG	MSTRG.50557	82.218	1.56199	5.97717e-06	2.426e-05
8h_de.RI;	8h_de.DEG	MSTRG.51009	63.7797	1.8237	1.04652e-05	4.093e-05
8h_de.SE;	8h_de.DEG	MSTRG.14126	985.524	-1.36931	2.67732e-05	9.81757e-05
8h_de.SE;8h_de.RI;	8h_de.DEG	MSTRG.38409	75.0646	1.3107	2.84626e-05	0.000103977
8h_de.SE;	8h_de.DEG	MSTRG.21765	94.4713	1.14151	4.45863e-05	0.000157716
8h_de.A3SS;	8h_de.DEG	MSTRG.585	79.3819	1.22919	4.63154e-05	0.000163397
8h_de.A5SS;	8h_de.DEG	MSTRG.48625	806.333	-3.57957	5.27786e-05	0.000184419
8h_de.A3SS;	8h_de.DEG	MSTRG.40834	41.2697	1.72542	0.00011117	0.000367417
8h_de.RI;	8h_de.DEG	MSTRG.9519	2036.91	-1.53995	0.000177129	0.000564003
8h_de.A5SS;	8h_de.DEG	MSTRG.51636	742.791	-2.51862	0.000470981	0.00138481
8h_de.A5SS;	8h_de.DEG	MSTRG.27626	70.6968	1.09387	0.000580094	0.0016764
8h_de.A3SS;	8h_de.DEG	MSTRG.47101	64.6575	1.18221	0.00134147	0.00359847
8h_de.A3SS;	8h_de.DEG	MSTRG.30519	79.7514	-1.28289	0.00159809	0.00421919
8h_de.RI;	8h_de.DEG	MSTRG.36238	34.9458	-1.44879	0.00182205	0.00474885
8h_de.RI;	8h_de.DEG	MSTRG.51009	37.6094	1.66748	0.0025051	0.00634645
8h_de.A3SS;	8h_de.DEG	MSTRG.33064	27.7709	-1.19959	0.011674	0.0251087
8h_de.SE;8h_de.A5SS;	8h_de.DEG	MSTRG.50604	36.4811	-1.21286	0.0154686	0.0322287
8h_de.A3SS;	8h_de.DEG	MSTRG.39815	12.3519	-1.41255	0.0236564	0.0468416
4h_cold.SE;	4h_cold.DEG	MSTRG.41330	1799.97	5.23956	3.80178e-52	2.58686e-49
4h_cold.RI;	4h_cold.DEG	MSTRG.26437	275.366	3.80569	3.03458e-50	1.80401e-47
4h_cold.A5SS;	4h_cold.DEG	MSTRG.15958	854.104	4.51838	7.02783e-47	3.30753e-44
4h_cold.SE;	4h_cold.DEG	MSTRG.11411	343.922	4.2785	1.67625e-36	3.864e-34
4h_cold.A5SS;	4h_cold.DEG	MSTRG.28675	4852.77	2.51669	1.57307e-34	3.18425e-32
4h_cold.SE;	4h_cold.DEG	MSTRG.11411	100.79	3.91183	1.53451e-24	1.43482e-22
4h_cold.SE;4h_cold.A3SS;4h_cold.A5SS;	4h_cold.DEG	MSTRG.40702	691.274	2.44928	6.14615e-24	5.49225e-22
4h_cold.A3SS;	4h_cold.DEG	MSTRG.5332	157.204	3.74048	1.27847e-17	6.12929e-16
4h_cold.A5SS;	4h_cold.DEG	MSTRG.45499	181.608	3.14653	1.35507e-17	6.48552e-16
4h_cold.A3SS;	4h_cold.DEG	MSTRG.5332	121.747	2.39951	5.39008e-17	2.43528e-15
4h_cold.SE;	4h_cold.DEG	MSTRG.29659	417.383	1.54514	1.92206e-15	7.46561e-14
4h_cold.RI;	4h_cold.DEG	MSTRG.9519	4744.81	1.32705	1.41106e-14	4.96826e-13
4h_cold.A5SS;	4h_cold.DEG	MSTRG.40466	235.582	2.33051	2.02695e-14	7.00577e-13
4h_cold.MXE;	4h_cold.DEG	MSTRG.15727	1074	1.35123	1.62749e-13	4.9152e-12
4h_cold.SE;4h_cold.A5SS;4h_cold.RI;	4h_cold.DEG	MSTRG.37961	6183.65	1.81772	1.7585e-13	5.28262e-12
4h_cold.A5SS;	4h_cold.DEG	MSTRG.35172	169.634	1.71666	1.85109e-13	5.54895e-12
4h_cold.RI;	4h_cold.DEG	MSTRG.24280	104.524	2.44244	6.8891e-13	1.91095e-11
4h_cold.A3SS;	4h_cold.DEG	MSTRG.19835	426.481	-1.90695	2.44942e-12	6.35209e-11
4h_cold.SE;	4h_cold.DEG	MSTRG.24504	164.283	1.5535	3.45852e-12	8.77463e-11
4h_cold.SE;4h_cold.A3SS;4h_cold.RI;	4h_cold.DEG	MSTRG.21890	7011.11	1.57411	1.48081e-11	3.44724e-10
4h_cold.A5SS;	4h_cold.DEG	MSTRG.26121	94.8327	2.55956	1.50042e-10	3.04594e-09
4h_cold.A3SS;	4h_cold.DEG	MSTRG.46651	459.874	1.66836	5.29251e-10	9.97663e-09
4h_cold.SE;	4h_cold.DEG	MSTRG.42565	768.025	1.62041	1.2704e-09	2.24455e-08
4h_cold.A3SS;	4h_cold.DEG	MSTRG.47198	246.399	1.43857	2.89688e-09	4.84323e-08
4h_cold.SE;	4h_cold.DEG	MSTRG.24504	45.6959	1.77298	4.97662e-07	5.69407e-06
4h_cold.A3SS;	4h_cold.DEG	MSTRG.22302	327.361	1.54847	1.49346e-06	1.55848e-05
4h_cold.A5SS;	4h_cold.DEG	MSTRG.1717	475.935	1.05992	4.71874e-06	4.4239e-05
4h_cold.SE;4h_cold.A3SS;4h_cold.A5SS;	4h_cold.DEG	MSTRG.44127	1117.65	1.71443	4.84411e-06	4.52491e-05
4h_cold.A5SS;	4h_cold.DEG	MSTRG.19531	145.967	1.18464	5.25465e-06	4.87613e-05
4h_cold.A3SS;	4h_cold.DEG	MSTRG.14663	76.9348	-1.45946	8.74997e-06	7.72613e-05
4h_cold.SE;	4h_cold.DEG	MSTRG.17460	318.533	1.11477	0.000243468	0.00150324
4h_cold.SE;	4h_cold.DEG	MSTRG.36434	69.8418	1.31163	0.000275845	0.00167602
4h_cold.SE;	4h_cold.DEG	MSTRG.26187	29.7339	-1.74815	0.000405813	0.00234794
4h_cold.SE;4h_cold.A5SS;	4h_cold.DEG	MSTRG.11046	36.9247	-1.4082	0.0026767	0.0120185
4h_cold.SE;	4h_cold.DEG	MSTRG.34330	29.8217	-1.24957	0.00305805	0.0134643
4h_cold.A5SS;	4h_cold.DEG	MSTRG.34983	56.4271	-1.13561	0.0034956	0.015062
4h_cold.RI;	4h_cold.DEG	MSTRG.12583	22.042	-1.41308	0.00355717	0.0152911
4h_cold.A5SS;	4h_cold.DEG	MSTRG.34983	33.0341	-1.20873	0.00526313	0.0212801
24h_cold.A3SS;24h_cold.A5SS;	24h_cold.DEG	MSTRG.27581	657.812	4.97767	1.11379e-99	2.07856e-97
24h_cold.A5SS;	24h_cold.DEG	MSTRG.51636	690.366	-4.32127	1.15241e-75	1.13391e-73
24h_cold.A3SS;24h_cold.A5SS;	24h_cold.DEG	MSTRG.20621	1676.92	4.40987	9.033e-72	8.12018e-70
24h_cold.A3SS;	24h_cold.DEG	MSTRG.21998	350.451	-3.74972	9.41448e-71	8.2458e-69
24h_cold.A3SS;	24h_cold.DEG	MSTRG.27771	355.18	-3.9573	8.89184e-69	7.51985e-67
24h_cold.A3SS;	24h_cold.DEG	MSTRG.42525	503.66	-2.43925	2.92234e-51	1.40726e-49
24h_cold.SE;24h_cold.A5SS;	24h_cold.DEG	MSTRG.12560	228.368	-3.24187	3.61698e-49	1.59651e-47
24h_cold.A3SS;	24h_cold.DEG	MSTRG.10011	159.364	-3.72775	6.01059e-44	2.17337e-42
24h_cold.A5SS;	24h_cold.DEG	MSTRG.34438	252.735	-3.13782	1.99998e-43	7.12268e-42
24h_cold.A5SS;	24h_cold.DEG	MSTRG.26509	172.856	-3.58261	2.88504e-43	1.01627e-41
24h_cold.A3SS;	24h_cold.DEG	MSTRG.50673	137.568	-4.74299	3.88148e-43	1.36024e-41
24h_cold.A3SS;	24h_cold.DEG	MSTRG.41862	167.49	-3.49981	4.18413e-41	1.35209e-39
24h_cold.A3SS;	24h_cold.DEG	MSTRG.42405	115.774	-4.92931	9.79482e-41	3.13057e-39
24h_cold.A3SS;	24h_cold.DEG	MSTRG.10332	563.283	3.0247	1.44537e-38	4.30163e-37
24h_cold.A3SS;	24h_cold.DEG	MSTRG.41862	169.851	-3.50591	7.17983e-37	2.00376e-35
24h_cold.A3SS;	24h_cold.DEG	MSTRG.51415	445.297	3.22842	2.42369e-36	6.63441e-35
24h_cold.A3SS;	24h_cold.DEG	MSTRG.18780	174.652	-3.62086	2.33032e-35	6.12488e-34
24h_cold.A3SS;	24h_cold.DEG	MSTRG.7261	262.727	3.76077	3.00696e-34	7.55405e-33
24h_cold.SE;	24h_cold.DEG	MSTRG.53022	686.342	-2.48829	9.49144e-30	1.91885e-28
24h_cold.A5SS;	24h_cold.DEG	MSTRG.19531	468.423	3.00272	9.90288e-30	1.99808e-28
24h_cold.A5SS;	24h_cold.DEG	MSTRG.19543	158.52	-2.47861	5.36805e-29	1.04036e-27
24h_cold.RI;	24h_cold.DEG	MSTRG.21319	299.36	2.31689	3.62212e-28	6.7432e-27
24h_cold.A3SS;	24h_cold.DEG	MSTRG.12596	1789.94	1.52457	4.76901e-28	8.83281e-27
24h_cold.A5SS;	24h_cold.DEG	MSTRG.53196	105.35	-3.31468	5.22673e-28	9.65726e-27
24h_cold.A3SS;	24h_cold.DEG	MSTRG.2580	79.1402	-5.27877	6.67574e-28	1.22388e-26
24h_cold.RI;	24h_cold.DEG	MSTRG.9639	69.1568	-4.40478	1.44006e-24	2.25208e-23
24h_cold.A3SS;	24h_cold.DEG	MSTRG.40834	130.199	3.59401	5.02821e-23	7.20639e-22
24h_cold.A5SS;	24h_cold.DEG	MSTRG.36570	187.151	-2.568	3.53051e-22	4.80847e-21
24h_cold.SE;	24h_cold.DEG	MSTRG.40530	184.928	-2.16112	3.60375e-22	4.90388e-21
24h_cold.SE;	24h_cold.DEG	MSTRG.36377	470.006	2.3821	1.24097e-19	1.47346e-18
24h_cold.A3SS;	24h_cold.DEG	MSTRG.49553	1087.44	-1.30141	5.59026e-19	6.35495e-18
24h_cold.A5SS;	24h_cold.DEG	MSTRG.24619	178.612	-2.3177	1.61639e-18	1.77747e-17
24h_cold.A3SS;	24h_cold.DEG	MSTRG.50850	233.743	-3.20681	6.41089e-18	6.7748e-17
24h_cold.RI;	24h_cold.DEG	MSTRG.21890	2617.03	-1.88012	1.24123e-17	1.29103e-16
24h_cold.RI;	24h_cold.DEG	MSTRG.28222	2644.53	1.08477	1.27404e-16	1.23869e-15
24h_cold.SE;	24h_cold.DEG	MSTRG.11474	1666.54	2.33875	8.97973e-16	8.23014e-15
24h_cold.A5SS;	24h_cold.DEG	MSTRG.37371	112.116	-1.83806	5.45798e-15	4.72184e-14
24h_cold.A5SS;	24h_cold.DEG	MSTRG.15958	1299.3	4.9162	5.76268e-15	4.97353e-14
24h_cold.A3SS;	24h_cold.DEG	MSTRG.39041	105.626	-2.16756	2.03232e-14	1.681e-13
24h_cold.A5SS;	24h_cold.DEG	MSTRG.50841	97.7552	2.30248	1.16602e-12	8.33522e-12
24h_cold.RI;	24h_cold.DEG	MSTRG.9919	7954.79	-1.1871	1.00974e-11	6.63768e-11
24h_cold.SE;	24h_cold.DEG	MSTRG.42815	1769.63	1.31049	1.0672e-11	6.99966e-11
24h_cold.RI;	24h_cold.DEG	MSTRG.23151	1138.21	1.10369	1.23469e-11	8.06031e-11
24h_cold.A3SS;	24h_cold.DEG	MSTRG.37891	435.434	1.09764	3.90468e-11	2.44283e-10
24h_cold.SE;	24h_cold.DEG	MSTRG.17128	145.029	-1.89408	1.33728e-10	7.98389e-10
24h_cold.RI;	24h_cold.DEG	MSTRG.926	594.4	1.15176	2.01282e-10	1.1825e-09
24h_cold.A3SS;	24h_cold.DEG	MSTRG.50526	88.2619	2.18168	3.10399e-10	1.79639e-09
24h_cold.RI;	24h_cold.DEG	MSTRG.12850	190.445	1.50747	8.65998e-10	4.81094e-09
24h_cold.SE;	24h_cold.DEG	MSTRG.18346	210.482	1.20922	1.69479e-09	9.14461e-09
24h_cold.SE;	24h_cold.DEG	MSTRG.8081	454.476	1.77021	1.7923e-09	9.65044e-09
24h_cold.A3SS;	24h_cold.DEG	MSTRG.2504	179.544	-1.57112	2.17647e-09	1.1616e-08
24h_cold.RI;	24h_cold.DEG	MSTRG.35293	121.09	1.63906	6.2657e-09	3.18673e-08
24h_cold.SE;	24h_cold.DEG	MSTRG.18001	263.316	1.08546	1.65844e-08	8.06277e-08
24h_cold.RI;	24h_cold.DEG	MSTRG.29865	239.726	1.24455	2.22708e-08	1.06693e-07
24h_cold.RI;	24h_cold.DEG	MSTRG.36148	308.177	1.00397	4.23003e-08	1.96978e-07
24h_cold.A5SS;	24h_cold.DEG	MSTRG.26121	70.4671	1.76012	1.34112e-07	5.8925e-07
24h_cold.A5SS;	24h_cold.DEG	MSTRG.39031	310.604	1.11736	2.31626e-07	9.91313e-07
24h_cold.A3SS;24h_cold.RI;	24h_cold.DEG	MSTRG.46125	48.7515	1.735	1.10693e-06	4.38093e-06
24h_cold.A3SS;	24h_cold.DEG	MSTRG.39923	77.8975	1.46356	2.11279e-06	8.06573e-06
24h_cold.A3SS;	24h_cold.DEG	MSTRG.15762	149.895	-1.0545	6.95305e-06	2.48604e-05
24h_cold.SE;	24h_cold.DEG	MSTRG.34123	60.5036	1.69887	1.87279e-05	6.31131e-05
24h_cold.SE;24h_cold.A3SS;	24h_cold.DEG	MSTRG.18141	904.8	-1.01258	4.41961e-05	0.000141088
24h_cold.RI;	24h_cold.DEG	MSTRG.51009	58.742	1.59838	5.88895e-05	0.000184315
24h_cold.A3SS;24h_cold.RI;	24h_cold.DEG	MSTRG.14394	43.0548	1.49585	6.16512e-05	0.000192399
24h_cold.RI;	24h_cold.DEG	MSTRG.46436	55.3177	1.49514	6.49787e-05	0.000202095
24h_cold.SE;	24h_cold.DEG	MSTRG.17688	57.7788	1.0938	0.00153098	0.00377098
24h_cold.RI;	24h_cold.DEG	MSTRG.46436	19.8442	1.8131	0.00191318	0.00462844
4h_ABA.RI;	4h_ABA.DEG	MSTRG.51018	1031.96	-3.11874	6.50387e-25	9.35326e-23
4h_ABA.RI;	4h_ABA.DEG	MSTRG.47972	122.243	2.72391	4.15705e-23	5.04862e-21
4h_ABA.A5SS;	4h_ABA.DEG	MSTRG.19531	254.671	2.30685	6.28559e-23	7.44081e-21
4h_ABA.A5SS;	4h_ABA.DEG	MSTRG.1717	173.569	-2.553	2.16578e-18	1.65915e-16
4h_ABA.A3SS;	4h_ABA.DEG	MSTRG.28478	121.314	-2.1723	6.47507e-15	3.28901e-13
4h_ABA.RI;	4h_ABA.DEG	MSTRG.51018	170.419	-2.9932	7.97137e-15	3.99492e-13
4h_ABA.SE;	4h_ABA.DEG	MSTRG.36680	252.266	2.00031	9.76068e-14	4.2513e-12
4h_ABA.A5SS;	4h_ABA.DEG	MSTRG.34246	572.178	2.14028	7.42924e-12	2.44922e-10
4h_ABA.A5SS;	4h_ABA.DEG	MSTRG.50841	81.3358	2.31706	5.39933e-11	1.55774e-09
4h_ABA.RI;	4h_ABA.DEG	MSTRG.926	559.925	1.42305	3.38408e-09	7.32154e-08
4h_ABA.A5SS;	4h_ABA.DEG	MSTRG.51636	722.008	-1.586	5.38274e-08	9.3446e-07
4h_ABA.A5SS;	4h_ABA.DEG	MSTRG.22791	499.751	1.35688	4.31634e-06	5.00738e-05
4h_ABA.A3SS;	4h_ABA.DEG	MSTRG.51415	124.684	1.33574	6.37326e-06	7.12037e-05
4h_ABA.RI;	4h_ABA.DEG	MSTRG.14394	36.5817	1.55495	3.1412e-05	0.000294187
4h_ABA.RI;	4h_ABA.DEG	MSTRG.46436	40.9029	1.27802	0.000443044	0.00299176
24h_ABA.SE;	24h_ABA.DEG	MSTRG.40702	1328.24	3.32255	3.21162e-57	7.73011e-55
24h_ABA.A5SS;	24h_ABA.DEG	MSTRG.35503	388.373	4.89726	9.12066e-49	1.47346e-46
24h_ABA.A5SS;	24h_ABA.DEG	MSTRG.19531	714.759	3.72383	5.08608e-48	7.93629e-46
24h_ABA.RI;	24h_ABA.DEG	MSTRG.8592	580.987	-2.38231	7.52308e-43	9.16505e-41
24h_ABA.A3SS;	24h_ABA.DEG	MSTRG.31297	93.0841	-4.49767	1.28663e-34	9.94691e-33
24h_ABA.RI;	24h_ABA.DEG	MSTRG.47972	201.204	3.27195	6.13035e-32	4.07213e-30
24h_ABA.A5SS;	24h_ABA.DEG	MSTRG.7680	674.545	2.54368	4.19814e-26	1.91693e-24
24h_ABA.A3SS;	24h_ABA.DEG	MSTRG.10011	169.725	-2.45668	3.77717e-23	1.39737e-21
24h_ABA.A3SS;	24h_ABA.DEG	MSTRG.38143	270.168	2.29357	5.14266e-20	1.54101e-18
24h_ABA.A3SS;	24h_ABA.DEG	MSTRG.7261	115.666	2.48639	4.85314e-16	1.05687e-14
24h_ABA.A5SS;	24h_ABA.DEG	MSTRG.50841	106.797	2.50788	9.37763e-16	1.98473e-14
24h_ABA.A3SS;	24h_ABA.DEG	MSTRG.6362	163.508	-3.18143	4.05104e-15	8.15296e-14
24h_ABA.A5SS;	24h_ABA.DEG	MSTRG.22572	426.776	1.36157	1.68138e-08	1.67999e-07
24h_ABA.SE;	24h_ABA.DEG	MSTRG.36434	115.801	2.0424	1.09673e-07	9.89104e-07
24h_ABA.SE;	24h_ABA.DEG	MSTRG.18346	189.154	1.05244	1.30053e-07	1.16145e-06
24h_ABA.A3SS;24h_ABA.RI;	24h_ABA.DEG	MSTRG.46125	50.0693	1.84531	1.85821e-07	1.62007e-06
24h_ABA.RI;	24h_ABA.DEG	MSTRG.46436	57.2635	1.62347	6.41403e-07	5.15935e-06
24h_ABA.A3SS;24h_ABA.RI;	24h_ABA.DEG	MSTRG.46125	99.4743	1.15489	4.91161e-06	3.46177e-05
24h_ABA.SE;	24h_ABA.DEG	MSTRG.8133	110.227	1.50817	5.36118e-05	0.000312141
24h_ABA.RI;	24h_ABA.DEG	MSTRG.51009	47.9836	1.25819	0.000703628	0.00322201
24h_ABA.RI;	24h_ABA.DEG	MSTRG.46436	18.7131	1.76082	0.0010261	0.00451571
4h_NaCl.A5SS;	4h_NaCl.DEG	MSTRG.19531	734.868	3.90476	1.67915e-96	2.36299e-93
4h_NaCl.A5SS;	4h_NaCl.DEG	MSTRG.51636	629.548	-3.62014	9.72886e-60	3.74976e-57
4h_NaCl.A5SS;	4h_NaCl.DEG	MSTRG.7680	1350.96	3.80356	5.64931e-55	1.74414e-52
4h_NaCl.A3SS;	4h_NaCl.DEG	MSTRG.7261	246.871	3.8518	8.09677e-39	1.03584e-36
4h_NaCl.SE;	4h_NaCl.DEG	MSTRG.9539	765.956	3.70377	8.93032e-35	8.87596e-33
4h_NaCl.A3SS;	4h_NaCl.DEG	MSTRG.51055	163.043	2.6155	2.49642e-28	1.54461e-26
4h_NaCl.RI;	4h_NaCl.DEG	MSTRG.26225	523.232	-2.72897	7.76092e-28	4.60421e-26
4h_NaCl.RI;	4h_NaCl.DEG	MSTRG.21319	285.054	2.44379	2.86784e-27	1.6418e-25
4h_NaCl.A3SS;	4h_NaCl.DEG	MSTRG.51415	323.595	2.90981	4.20018e-25	2.04145e-23
4h_NaCl.RI;	4h_NaCl.DEG	MSTRG.29865	316.145	2.00638	5.12681e-23	2.09617e-21
4h_NaCl.A3SS;	4h_NaCl.DEG	MSTRG.35636	85.1508	-2.77676	8.30433e-20	2.57039e-18
4h_NaCl.A5SS;	4h_NaCl.DEG	MSTRG.35503	128.141	3.33863	7.19411e-19	2.03902e-17
4h_NaCl.A5SS;	4h_NaCl.DEG	MSTRG.34246	407.593	1.37079	4.43745e-15	8.7125e-14
4h_NaCl.A3SS;	4h_NaCl.DEG	MSTRG.49708	126.534	2.1583	8.98506e-15	1.7028e-13
4h_NaCl.A5SS;	4h_NaCl.DEG	MSTRG.22791	738.587	1.96248	1.11054e-14	2.08247e-13
4h_NaCl.A5SS;	4h_NaCl.DEG	MSTRG.35994	270.774	1.63468	3.36895e-13	5.35506e-12
4h_NaCl.A5SS;	4h_NaCl.DEG	MSTRG.39031	381.749	1.7657	1.03729e-12	1.5445e-11
4h_NaCl.A3SS;	4h_NaCl.DEG	MSTRG.27581	129.722	2.64599	1.71684e-11	2.18255e-10
4h_NaCl.A5SS;	4h_NaCl.DEG	MSTRG.8133	167.928	2.43449	2.72271e-11	3.36719e-10
4h_NaCl.A3SS;	4h_NaCl.DEG	MSTRG.35531	205.45	-1.86914	1.50253e-10	1.67875e-09
4h_NaCl.RI;	4h_NaCl.DEG	MSTRG.926	522.79	1.13679	1.13548e-08	9.75994e-08
4h_NaCl.A3SS;	4h_NaCl.DEG	MSTRG.42942	88.8168	1.60199	6.31909e-08	4.82013e-07
4h_NaCl.A3SS;	4h_NaCl.DEG	MSTRG.38855	75.9428	-1.53811	1.53378e-07	1.09255e-06
4h_NaCl.A3SS;	4h_NaCl.DEG	MSTRG.6759	246.556	-1.05695	2.04547e-07	1.42451e-06
4h_NaCl.SE;	4h_NaCl.DEG	MSTRG.53526	30.3488	2.50414	2.35273e-07	1.62428e-06
4h_NaCl.SE;	4h_NaCl.DEG	MSTRG.1012	105.41	1.27943	5.39042e-07	3.48302e-06
4h_NaCl.RI;	4h_NaCl.DEG	MSTRG.13235	181.211	1.35277	2.21082e-06	1.2942e-05
4h_NaCl.A5SS;	4h_NaCl.DEG	MSTRG.13936	138.762	1.26432	3.49359e-06	1.96491e-05
4h_NaCl.A5SS;	4h_NaCl.DEG	MSTRG.20488	78.3825	1.39422	4.85305e-06	2.6579e-05
4h_NaCl.A5SS;	4h_NaCl.DEG	MSTRG.22626	52.8654	-1.63141	6.21211e-05	0.000275269
4h_NaCl.A3SS;	4h_NaCl.DEG	MSTRG.22103	874.356	-1.15197	0.000174369	0.000702443
4h_NaCl.RI;	4h_NaCl.DEG	MSTRG.46436	44.2237	1.29191	0.000215395	0.000850283
4h_NaCl.RI;	4h_NaCl.DEG	MSTRG.51009	47.8799	1.43409	0.00028817	0.00110457
4h_NaCl.A3SS;	4h_NaCl.DEG	MSTRG.12328	18.268	-1.6304	0.002594	0.007918
4h_NaCl.RI;	4h_NaCl.DEG	MSTRG.52176	156.418	1.2049	0.00510594	0.0143547
4h_NaCl.RI;	4h_NaCl.DEG	MSTRG.51009	28.401	1.28337	0.0199624	0.0467695
4h_NaCl.RI;	4h_NaCl.DEG	MSTRG.46436	14.0895	1.38963	0.0206365	0.0481178
24h_NaCl.A5SS;	24h_NaCl.DEG	MSTRG.40528	1068.63	-7.83042	3.04316e-153	6.60467e-150
24h_NaCl.A5SS;	24h_NaCl.DEG	MSTRG.19531	475.553	3.12271	5.95871e-64	2.37534e-61
24h_NaCl.A5SS;	24h_NaCl.DEG	MSTRG.7680	1038.02	3.29297	3.31304e-47	7.29853e-45
24h_NaCl.RI;	24h_NaCl.DEG	MSTRG.47972	122.419	2.50176	1.1548e-24	8.14318e-23
24h_NaCl.A3SS;	24h_NaCl.DEG	MSTRG.38321	181.888	2.32389	2.38531e-23	1.51931e-21
24h_NaCl.A3SS;	24h_NaCl.DEG	MSTRG.31297	102.242	-2.48573	3.14147e-19	1.46449e-17
24h_NaCl.A5SS;	24h_NaCl.DEG	MSTRG.51636	2272.09	1.4148	8.9676e-16	3.07665e-14
24h_NaCl.A5SS;	24h_NaCl.DEG	MSTRG.22791	656.492	1.62529	2.54871e-15	8.33435e-14
24h_NaCl.A5SS;	24h_NaCl.DEG	MSTRG.50841	83.6528	2.13215	6.4505e-14	1.82429e-12
24h_NaCl.A3SS;	24h_NaCl.DEG	MSTRG.51415	144.409	1.35976	3.08589e-09	4.73749e-08
24h_NaCl.RI;	24h_NaCl.DEG	MSTRG.46125	90.1436	1.0015	0.000285631	0.00167881
24h_NaCl.A3SS;	24h_NaCl.DEG	MSTRG.42942	70.5294	1.00662	0.000579756	0.00312626
24h_NaCl.RI;	24h_NaCl.DEG	MSTRG.51009	46.4252	1.24601	0.000600083	0.00321899
